# Supplementary material for: Epigenetic Rewiring Connects Aging to Alzheimer’s Pathology in the Human Prefrontal Cortex
Source: Research Square preprint supplement (doi:10.21203/rs.3.rs-7381745/v1), 2025-08-29
Supplement: Supplementary file 1 [file 7d47107d2125c35f8a48c49a.xlsx]

## Sheet: catalogue
Table Number	Title
STable1	KEGG enrichment analysis of the top 1000 differentially methylated CpGs between the northern and southern China
STable2	Gene Set Enrichment Analysis (GSEA) of age-associated CpGs
STable3	Age-associated CpGs shared between CBMAP and ROSMAP
STable4	GO enrichment analysis of the CpGs shared by CBMAP and ROSMAP
STable5	CBMAP-specific age-associated CpGs
STable6	CpGs significant in CBMAP & ROSMAP (PFC) but not Hannum (blood)
STable7	GO enrichment analysis of 186 PFC-specific age-associated CpGs
STable8	GO enrichment analysis of top 1,000 age-associated CpGs
STable9	Integrated analysis of age, CpGs, and histone gene expression
STable10	Mediation analysis for age-methylation-histone gene expression pathways
STable11	PFC-specific epigenetic mediation of age effects on gene expression
STable12	Meta-analysis of significant CpGs associations with AD pathological markers (ADNC, Braak NFT, Aβ Score)
STable13	GO enrichment analysis of ADNC-associated CpGs
STable14	KEGG enrichment analysis of ADNC-associated CpGs
STable15	GO enrichment analysis of Braak NFT stage-associated CpGs
STable16	GO enrichment analysis of Aβ-associated CpGs
STable17	Sensitivity analysis of ADNC-associated CpGs
STable18	Functional enrichment of hub CpGs in ADNC-associated co-methylation modules
STable19	Pathway analysis of pseudotemporal CpGs trajectory clusters in ADNC
STable20	Pathway analysis of pseudotemporal CpGs trajectory clusters in Braak NFT stage
STable21	Pathway analysis of pseudotemporal CpGs trajectory clusters in Aβ

## Sheet: STable1
KEGG enrichment analysis of the top 1000 differentially methylated CpGs between the northern and southern China
category	subcategory	ID	Description	GeneRatio	BgRatio	pvalue	p.adjust	qvalue	geneID	Count
Organismal Systems	Immune system	hsa04662	B cell receptor signaling pathway	0.04	78/6567	3.74085641187603e-06	0.000939860257225027	0.000929841760146012	GSK3B, NFATC3, LILRB3, LOC102725035, LOC107987425, LOC107987462, LILRA6, LILRB5, LILRB2, LILRA5	16
Environmental Information Processing	Signaling molecules and interaction	hsa04061	Viral protein interaction with cytokine and cytokine receptor	0.04	55/6567	5.94848264066473e-06	0.000939860257225027	0.000929841760146012	IL20RB, CCR10, CXCR2, CXCR1, TNFRSF14, TNFRSF1B, IL20RA, IL10RA, CCL5, CXCL8	13
Environmental Information Processing	Signaling molecules and interaction	hsa04060	Cytokine-cytokine receptor interaction	0.06	183/6567	0.000406584589742388	0.0423808110440472	0.0419290502334511	TNFRSF12A, IL20RB, CCR10, ACVRL1, CXCR2, CXCR1, TNFRSF14, TNFRSF1B, IL20RA, IL10RA	22
Organismal Systems	Development and regeneration	hsa04380	Osteoclast differentiation	0.05	127/6567	0.000536465962582876	0.0423808110440472	0.0419290502334511	LILRB3, LOC102725035, LOC107987425, LOC107987462, LILRA6, LILRB5, LILRB2, LILRA5, LILRA2, SOCS3	17

## Sheet: STable2
Gene Set Enrichment Analysis (GSEA) of age-associated CpGs
pathway	pval	padj	log2err	ES	NES	size	leadingEdge	gs_cat	gs_subcat	gs_description
FAN_EMBRYONIC_CTX_OLIG	1.08684e-35	2.8133e-31	1.55654	0.438132	2.57162	716	ADAMTS18, NENF, PACC1, FAM177A1, TMEM230, NDRG1, TECR, PPP1R16B, FGFR2, BTBD16, CDR2L, PLA2G4C, CARNS1, IPO13, BBX, LPAR1, MAP7D1, ALAD, HID1, TMEM63A, QDPR, PCSK7, PXK, RGS3, VWA1, SEPTIN4, HIPK2, SHTN1, GAB2, RHOU, BCAS1, STMN4, MEGF9, FRMD4B, TULP4, TCTA, GLDN, AMPD3, MAP7, TECPR2, ABCA2, TPRN, PREX1, GNAI1, PLD1, FUT8, GLTP, RNF103, SPATA2, PTPDC1, SECISBP2L, SCD, SH3GL3, MITF, SHISA4, ULK2, …	C8
FAN_EMBRYONIC_CTX_BIG_GROUPS_MICROGLIA	1.90919e-30	2.47097e-26	1.43181	-0.485949	-2.91659	354	PLVAP, TLR10, SERPINF1, OTUD1, ABI3, KLF2, ADAM28, GLRX, CTSB, CAPZB, GPX1, LGMN, CNPY3, GRN, VAMP8, PFN1, FCGR1A, PLEK, TAGAP, HCST, GADD45B, DAB2, MRC1, IFI30, ARRB2, OLFML3, PLD4, PDPN, C2, FYB1, COLGALT1, GAS6, CD300A, HCK, DNASE2, BLNK, BTG2, RAB3IL1, VDAC1, RGS10, NINJ1, C3AR1, LST1, AIF1, CEBPD, LAPTM5, TNFRSF1B, MYO1F, RHBDF2, GPSM3, TBXAS1, SP100, DUSP1, APLP2, LCP1, PARVG, DOCK2, ARPC1B…	C8
ZHONG_PFC_MAJOR_TYPES_MICROGLIA	1.02025e-28	8.80304e-25	1.38775	-0.456977	-2.79341	413	PLVAP, TLR10, SERPINF1, OTUD1, ABI3, KLF2, ADAM28, CTSB, CAPZB, GPX1, LGMN, CNPY3, GRN, VAMP8, PFN1, FCGR1A, SLC29A1, PLEK, ANXA11, TAGAP, HCST, GADD45B, JAG1, DAB2, CTSA, MRC1, IFI30, ARRB2, OLFML3, PLD4, PDPN, C2, VAV1, RBMS1, FYB1, COLGALT1, GAS6, CD300A, HCK, GNAI2, BLNK, BTG2, RUNX1, RAB3IL1, RGS10, NINJ1, C3AR1, LST1, AIF1, CEBPD, LAPTM5, TNFRSF1B, MYO1F, RHBDF2, MBNL1, GPSM3, TBXAS1, SP100…	C8
HU_FETAL_RETINA_MICROGLIA	9.96533e-25	6.44881e-21	1.2871	-0.451878	-2.71808	359	TLR10, ABI3, KLF2, ADAM28, GLRX, CTSB, CAPZB, GPX1, LGMN, HLA-DRB1, CEBPB, CNPY3, GRN, VAMP8, PFN1, AKAP13, FCGR1A, SLC29A1, PLEK, ANXA11, TAGAP, HCST, GADD45B, OAZ1, ARRB2, OLFML3, PLD4, ARPC2, FGL2, HLA-DRA, VAV1, SLA, FYB1, BAG3, COLGALT1, GAS6, CD300A, HCK, GNAI2, UBC, BLNK, STK10, BTG2, RUNX1, RGS10, NINJ1, C3AR1, LST1, AIF1, CEBPD, LAPTM5, TNFRSF1B, MYO1F, ACTB, RHBDF2, MBNL1, GPSM3, TBXAS1…	C8		Retinal Microglia
MODULE_84	1.47376e-24	7.62964e-21	1.2871	-0.41515	-2.57385	467	APOC2, HLA-DQA1, HLA-DQB1, SLPI, TRPV2, LILRA4, PARP12, CRABP1, STAT4, GNLY, CYP1B1, DEF6, TAGLN, FGFR1, ACTA2, COL1A2, HLA-DRB5, TSPAN4, MYH11, GAS1, CHST15, ADH1B, FCGR2B, GLRX, MYL9, MARCO, COL6A2, PCOLCE, C1S, COL6A3, PPBP, CHIT1, LGMN, QPCT, HLA-DRB1, SERPING1, IGFBP4, CCL19, ANXA1, GRN, F13A1, SLC38A10, CD6, ISG20, TGFBI, SECTM1, GNA15, CD209, PLEK, EPB41L3, FN1, AQP9, IGFBP3, TNFAIP8, DAB2…	C4	CM	Immune (humoral) and inflammatory response.
TRAVAGLINI_LUNG_ADVENTITIAL_FIBROBLAST_CELL	2.24798e-22	9.69815e-19	1.22105	-0.475852	-2.78694	281	GSTM5, BICC1, SLPI, COL1A1, LRRN4CL, SERPINF1, FBLN5, CYP1B1, OGN, FGFR1, COL1A2, SOCS3, ABI3BP, GAS1, ADH1B, KLF2, CRABP2, OSR1, COL6A2, PCOLCE, SCARA5, COL3A1, C1S, AKR1C1, COL6A3, FBLN2, MGP, PDLIM4, IGFBP6, IGFBP4, NRP1, ANXA1, ISLR, AOX1, B4GALT1, MEDAG, CPXM2, DCN, TUBB6, HTRA3, LEPR, DAB2, C1R, NNMT, OLFML3, IL32, PLAU, CTSK, PDPN, PLK3, FGL2, CLEC3B, PTGIS, C7, BAG3, VAT1, MYC, TCN2, BTG2…	C8
MURARO_PANCREAS_MESENCHYMAL_STROMAL_CELL	5.35771e-22	1.98121e-18	1.21254	-0.36225	-2.31329	641	PTGFRN, PEA15, COL1A1, FMOD, CRLF1, LTBP2, MFAP4, SERPINF1, CYP1B1, NCK2, ITGA5, COL8A1, ACTA2, SPHK1, COL1A2, CEMIP, FKBP9, CHST15, OLFML2A, TPM2, PSMA7, ADAMTS2, TPM4, ROCK2, COL6A2, RIC8A, CTSB, COL3A1, C1S, SVIL, CAPZB, COL6A3, COL18A1, MGP, CCN4, TXN, IGFBP4, NRP1, CEBPB, THBS1, ANXA1, ANO1, ISLR, YARS1, APEX1, PFN1, B4GALT1, SUSD2, MEDAG, AKAP13, VCL, TGFBI, DCN, RCN1, LAMC1, PTK7, TUBB6, R…	C8
HU_FETAL_RETINA_FIBROBLAST	1.14417e-21	3.47689e-18	1.20398	-0.439935	-2.63445	344	PLVAP, COL1A1, ARHGAP28, MFAP4, OGN, IGF2, FGFR1, ITGA5, COL1A2, SOCS3, FOXC2, FKBP9, TPM2, KLF2, ALDH1A2, MYL9, TPM4, FBLIM1, ROCK2, COL6A2, PHLDB2, TBX18, PCOLCE, CPXM1, SCARA5, COL3A1, SVIL, FOXC1, COL6A3, PRKAR1A, IGFBP6, IGFBP4, PFN1, TGFBI, DCN, LAMC1, PLXNC1, TUBB6, TGFB1I1, CDC42EP3, GADD45B, JAG1, FN1, DAB2, C1R, CLIC1, OLFML3, FAM111A, DKK2, KDELR2, CTSK, SNED1, NUDT4, RBMS1, LAMB1, BTG…	C8		Retinal Fibroblasts
DESCARTES_FETAL_CEREBELLUM_MICROGLIA	1.20888e-21	3.47689e-18	1.20398	-0.397498	-2.47242	480	PLVAP, BATF3, LILRA4, PIK3CG, TLR10, PLEKHA2, SERPINF1, DEF6, TNFSF8, OTUD1, SLC17A9, FCGR2B, ADAM28, CACNA2D4, CTSB, LYVE1, CAPZB, MYO7A, CFB, LILRB5, CHIT1, LGMN, MR1, B4GALT1, CD180, FCGR1A, RGS18, PIK3R5, GNA15, PLEK, TAGAP, GADD45B, MS4A6A, TFCP2L1, ARRB2, PLD4, LRMDA, ARHGAP15, IL10, ALOX15B, APOBR, CD300LF, DPP4, DENND1C, C2, VAV1, FYB1, HCK, DNASE2, TEP1, BLNK, PARP15, TLR6, BTG2, RUNX1, …	C8		descartes DE_gene_by_organ.csv, fold.change>5, qval<0.05, pval<0.05
CUI_DEVELOPING_HEART_C8_MACROPHAGE	1.6433e-21	4.25367e-18	1.20398	-0.481321	-2.80617	266	HLA-DQB1, OTUD1, GLRX, CTSB, GPX1, LGMN, HLA-DRB1, CEBPB, CNPY3, GRN, VAMP8, F13A1, FCGR1A, ADCY7, IQGAP2, PLEK, HCST, GADD45B, MS4A6A, MRC1, IFI30, JAML, ARRB2, PLD4, FGL2, HLA-DRA, SLA, FYB1, CD300A, HCK, GNAI2, RETN, BTG2, RUNX1, S100A4, RGS10, NINJ1, C3AR1, LST1, AIF1, CEBPD, LAPTM5, ATP6V1B2, TNFRSF1B, MYO1F, GPSM3, TBXAS1, SLC2A3, PLCB2, DUSP1, CYRIB, LCP1, PARVG, DOCK2, PRAM1, SPI1, ARPC1B…	C8
MANNO_MIDBRAIN_NEUROTYPES_HMGL	3.71381e-20	8.73928e-17	1.16018	-0.370175	-2.33256	539	PLVAP, APOC2, TRPV2, PIK3CG, SERPINF1, FAR2, OTUD1, ABI3, SIGLEC1, KLF2, ADAM28, GLRX, CTSB, CAPZB, GPX1, LGMN, CNPY3, ANO1, GRN, VAMP8, B4GALT1, FCGR1A, ADCY7, STAT6, PLEK, ANXA11, TAGAP, HCST, GADD45B, IGFBP3, PROCR, DAB2, MRC1, MAP2K3, ARRB2, OLFML3, OPRK1, PLD4, APOBEC3C, PLAU, PDPN, FGL2, APOBR, VAV1, SLA, FYB1, LTBR, BAG3, ADAT2, COLGALT1, GAS6, UBC, NIBAN1, BLNK, SCPEP1, RUNX1, IL27RA, RAB…	C8		Cell types are named using anatomical and functional mnemonics prefixed by 'm' or'h' to indicate mouse and human respectively: OMTN, oculomotor and trochlear nucleus; Sert, serotonergic; NbM, medial neuroblast; NbDA, neuroblast dopaminergic; DA0-2, dopaminergic neurons; RN, red nucleus; Gaba1-2, GABAergic neurons; mNbL1-2, lateral neuroblasts; NbML1-5, mediolateral neuroblasts; NProg, neuronal pr…
MODULE_5	1.20205e-19	2.59293e-16	1.14219	-0.409424	-2.49357	396	HLA-DQA1, HLA-DQB1, SLPI, LTBP2, MFAP4, CYP1B1, FGFR1, CD151, COL1A2, SOCS3, MYH11, EPCAM, TPM2, ADH1B, GLRX, MYL9, HOPX, MARCO, COL6A2, PCOLCE, COL3A1, C1S, COL6A3, AOC3, IGFBP6, LGMN, IGFBP4, THBS1, ANXA1, GRN, F13A1, TGFBI, SECTM1, CITED2, CYB5A, EPB41L3, FN1, DAB2, CTSA, MRC1, MAP2K3, NNMT, IL32, GNS, CLEC3B, DEPP1, EFNA1, C2, RBMS1, SLA, KRT18, C7, LTBR, SERPINA3, HCK, S100A4, TNFAIP2, COL4A…	C4	CM	Lung genes.
SCHUETZ_BREAST_CANCER_DUCTAL_INVASIVE_UP	1.52827e-19	3.04303e-16	1.14219	-0.429437	-2.55866	327	BICC1, PRNP, HLA-DQA1, HLA-DQB1, COL1A1, SERPINF1, ITGBL1, COL14A1, ATP10D, SPHK1, COL1A2, CEMIP, GAS1, SCG5, GLRX, MYL9, COL6A2, FZD2, COL3A1, C1S, KDR, COL6A3, FBLN2, CCN4, HLA-DRB1, SERPING1, NRP1, ANXA1, ISLR, TGFBI, DCN, FCGR1A, LAMC1, PLXNC1, ADCY7, TUBB6, TGFB1I1, MS4A6A, FN1, IGFBP3, PLN, DAB2, C1R, IFI30, CAVIN3, NNMT, LHFPL6, OLFML3, COL15A1, PLAU, CTSK, FGL2, HLA-DRA, LAMB1, S100A4, CO…	C2	CGP	Genes up-regulated in invasive ductal carcinoma (IDC) relative to ductal carcinoma in situ (DCIS, non-invasive).
HAY_BONE_MARROW_STROMAL	4.34907e-19	8.04112e-16	1.12391	-0.339457	-2.16774	649	BICC1, SLPI, COL1A1, FMOD, ARHGAP28, CRABP1, LTBP2, CDO1, FRZB, CYP1B1, MARK1, IGF2, ITGBL1, TAGLN, FGFR1, COL14A1, COL1A2, SOCS3, FOXC2, ABI3BP, TSPAN4, FKBP9, GAS1, OLFML2A, MATN3, ADH1B, ASS1, GGT5, THSD4, ADAMTS2, COL6A2, TMEM150C, PTGFR, TBX18, PCOLCE, COL3A1, C1S, DLX5, FOXC1, COL6A3, MGP, DLX6, SORBS2, TBX15, PDLIM4, ADAMTS1, IGFBP6, SERPING1, PLA2R1, IGFBP4, NRP1, ISLR, MEDAG, CPXM2, DCN,…	C8
MCLACHLAN_DENTAL_CARIES_UP	3.37317e-18	5.82096e-15	1.10534	-0.493138	-2.76962	205	HLA-DQA1, HLA-DQB1, SLPI, CRLF1, SOCS3, CYP1A1, CHST15, KPNA2, FCGR2B, GLRX, CTSB, MGP, CFB, HLA-DRB1, IGFBP4, VAMP8, F13A1, TNFRSF21, CD209, PLEK, MS4A6A, TNFAIP8, MRC1, IFI30, SELE, NNMT, COL15A1, PLAU, FGL2, DEPP1, HLA-DRA, SLA, FYB1, SERPINA3, HCK, BLNK, CFD, C3AR1, CEBPD, LAPTM5, TNFRSF1B, SLC2A3, CYRIB, CCL5, LCP1, ARPC1B, IER3, CD27, STAB1, PTPRC, CD53, FCGR2A, PTGER4, MNDA, TYROBP, SAA1, …	C2	CGP	Genes up-regulated in pulpal tissue extracted from carious teeth.
TRAVAGLINI_LUNG_TREM2_DENDRITIC_CELL	6.36696e-18	1.03005e-14	1.09593	-0.3581	-2.25243	535	HLA-DQA1, PEA15, HLA-DQB1, ATP6V1D, SERPINF1, EIF4EBP1, CD151, HLA-DRB5, JPT1, TSPAN4, FCGR2B, GLRX, PSMA7, MARCO, RPS27L, COL6A2, CTSB, HSP90AB1, HM13, LILRB5, CHIT1, GPX1, LGMN, QPCT, HLA-DRB1, SERPING1, TXN, RNF149, GRN, VAMP8, AGPAT2, TGFBI, FCGR1A, TUBB6, FUOM, PDLIM7, SLC29A1, PGD, CYB5A, MS4A6A, FN1, DAB2, CTSA, MRC1, CAMK1D, IFI30, CAVIN3, GNS, UROD, CTSK, CD300LF, PSMB3, C2, HLA-DRA, COL…	C8
FAN_OVARY_CL13_MONOCYTE_MACROPHAGE	8.53493e-18	1.29957e-14	1.08644	-0.387362	-2.37639	427	HLA-DQA1, PEA15, HLA-DQB1, COX6B1, SPHK1, HLA-DRB5, FCGR2B, CTSB, CAPZB, RAB8B, HM13, GPX1, LGMN, HLA-DRB1, TXN, ARL6IP5, CEBPB, ANXA1, CNPY3, GRN, VAMP8, PFN1, B4GALT1, BID, AKAP13, ISG20, GNA15, PLEK, ANXA11, NAA50, CDC42EP3, ATP6V1H, HCST, MS4A6A, TNFAIP8, MAP2K3, CLIC1, IFI30, JAML, OAZ1, CACYBP, ARRB2, TES, ARPC2, FGL2, PSMB3, HLA-DRA, BTG1, MTPN, GNAI2, PHACTR1, TUBA1C, S100A4, CFD, RGS10, …	C8		The ovaries analyzed showed a pronounced population of CD53high/CXCR4high immune cells (Fig. 2e), including separate clusters for adaptive T lymphocytes and Natural Killer (NK) cells (CL4 and CL12), B lymphocytes (CL18), and innate immune system, such as monocytes and macrophages (CL13)
KIM_ALL_DISORDERS_CALB1_CORR_UP	1.59206e-17	2.28947e-14	1.07687	-0.358247	-2.24858	522	GABRA2, PRNP, ATP6V1D, MPC2, SERPINF1, STX1A, NELL2, SNRNP40, PRUNE2, CLIP3, PAFAH1B1, PAK1, GOT1, SCG5, ASS1, PCSK1, PRKAR1A, HSP90AB1, HPCA, INA, YARS1, TSPYL4, TSPYL5, ADAM23, PEX11B, PCMT1, ATIC, TOMM34, NPTX1, YWHAB, SUCLA2, SERINC3, MOAP1, TBC1D9, CAP2, PDHX, ISCA1, SLC12A5, KARS1, HSPA12A, PSMD1, CERS6, MLLT11, OAZ1, CAMK1G, DUSP14, RER1, NSG2, UBE2N, HTR2A, ALDOA, UBC, GARS1, EFNB3, VDAC1…	C2	CGP	Genes whose expression significantly and positively correlated with the density of CALB1-positive [GeneID=793] GABAergic interneurons in the BA9 brain region across all subjects with psychiatric disorders.
LINDGREN_BLADDER_CANCER_CLUSTER_2B	1.76582e-17	2.40569e-14	1.07687	-0.405598	-2.43145	353	HLA-DQB1, SERPINF1, ACTG2, ACTA2, COL1A2, HLA-DRB5, SOCS3, ABI3BP, TPM2, FCGR2B, MYL9, COL6A2, STMN3, PCOLCE, CPXM1, C1S, COL6A3, COL18A1, PRKAR1A, FBLN2, MGP, AOC3, HLA-DRB1, SERPING1, ISG20, IQGAP2, HTRA3, CCN3, CDC42EP3, ELN, GADD45B, DAB2, C1R, IFI30, SELE, HMGCS1, NNMT, IL32, COL15A1, PNOC, ARHGAP15, TES, PDPN, ARPC2, FGL2, DKK3, HLA-DRA, FYB1, GJA5, SERPINA3, IL27RA, B3GNT2, CERK, CST7, RGS…	C2	CGP	Genes specifically up-regulated in Cluster IIb of urothelial cell carcinom (UCC) tumors.
REACTOME_INNATE_IMMUNE_SYSTEM	4.14741e-17	5.36779e-14	1.06721	-0.301913	-1.97311	859	NAPRT, PCBP2, CD47, MUC20, CAND1, SLPI, PSMD4, ATP6V1D, CTSV, TLR10, GNLY, POLR1C, CREB1, SUGT1, DSP, PAK1, APP, PSMA7, CTSB, C1S, HSP90AB1, PPP3CB, CFB, UBE2V1, PSMD13, WASF1, RAB3A, PPBP, STBD1, CHIT1, LGMN, QPCT, SERPING1, POLR3B, TXN, CNPY3, RAB3D, GRN, VAMP8, IMPDH2, AGPAT2, B4GALT1, CD180, VCL, FCGR1A, VTN, CD209, IQGAP2, STAT6, MYO1C, ATP6V1H, PSMD1, CTSA, C1R, MAP2K3, PIK3CB, MAP3K14, PLD…	C2	CP:REACTOME	Innate Immune System
HOSHIDA_LIVER_CANCER_SUBCLASS_S1	8.94378e-17	1.10243e-13	1.05746	-0.464703	-2.63488	219	CD47, PEA15, HLA-DQB1, LTBP2, CYP1B1, TAGLN, ACTA2, CD151, COL1A2, PAK1, TPM2, CRABP2, COL6A2, COL3A1, MGP, LGMN, SLBP, ANXA1, GRN, F13A1, PFN1, PROCR, DAB2, IFI30, OAZ1, GNS, COL15A1, ARPC2, FGL2, SLA, FYB1, LAMB1, ALDOA, GNAI2, LMO4, COL4A2, COL4A1, C3AR1, AIF1, LAPTM5, ATP6V1B2, TNFRSF1B, M6PR, GEM, CCL5, LCP1, ARPC1B, GUCY1A1, LOX, HK1, GYPC, IER3, S100A11, MAP1B, PTPRC, CD53, AP2S1, S100A10,…	C2	CGP	Genes from 'subtype S1' signature of hepatocellular carcinoma (HCC): aberrant activation of the WNT signaling pathway.
MANNO_MIDBRAIN_NEUROTYPES_HPERIC	1.19172e-16	1.40216e-13	1.04763	-0.319965	-2.06153	718	PLVAP, CISD1, TAPBPL, TRPV2, STAT4, FRZB, PDE4C, TAGLN, NCK2, ANKRD37, DSP, ACTA2, FAR2, COL1A2, GJC1, SLC16A12, SOCS3, OLFML2A, TPM2, FAM13A, GLRX, GGT5, MYL9, GALNT18, HOPX, TPM4, PPIB, TBX18, PCOLCE, COL3A1, C1S, SVIL, FOXC1, GIPC3, COL18A1, PRKAR1A, MGP, TBX15, ADAMTS1, CCN4, SERPING1, PLA2R1, IGFBP4, FGD5, GRN, LPP, VAMP8, PFN1, L3HYPDH, VCL, EHBP1L1, TGFBI, TNFRSF21, DCN, LAMC1, TUBB6, STAT…	C8		Cell types are named using anatomical and functional mnemonics prefixed by 'm' or'h' to indicate mouse and human respectively: OMTN, oculomotor and trochlear nucleus; Sert, serotonergic; NbM, medial neuroblast; NbDA, neuroblast dopaminergic; DA0-2, dopaminergic neurons; RN, red nucleus; Gaba1-2, GABAergic neurons; mNbL1-2, lateral neuroblasts; NbML1-5, mediolateral neuroblasts; NProg, neuronal pr…
GAO_LARGE_INTESTINE_24W_C11_PANETH_LIKE_CELL	1.86357e-16	2.09733e-13	1.04763	-0.419906	-2.47347	293	HLA-DQA1, HLA-DQB1, ABI3, SIGLEC1, LYVE1, LILRB5, LGMN, HLA-DRB1, CEBPB, F13A1, CD180, FCGR1A, SECTM1, PLXNC1, ADCY7, CD209, PLEK, PGD, HCST, MS4A6A, DAB2, MRC1, IFI30, ARRB2, IL10, NR4A3, PLAU, FGL2, C2, HLA-DRA, VAV1, SLA, FYB1, CD300A, HCK, TNFAIP2, NINJ1, LST1, AIF1, LAPTM5, ATP6V1B2, TNFRSF1B, NCF1, RHBDF2, GPSM3, TBXAS1, PLCB2, CD163L1, LCP1, DOCK2, SPI1, CYTH4, FGD2, CD68, STAB1, MFSD1, RA…	C8
MODULE_75	2.03966e-16	2.19985e-13	1.04763	-0.419364	-2.47027	293	CRLF1, SERPINF1, GNLY, IGF2, HLA-DRB5, C1S, CFB, LILRB5, PPBP, CHIT1, GPX1, SERPING1, NRP1, CCL19, GRN, CD6, ISG20, TGFBI, VTN, FN1, AQP9, DAB2, C1R, CSF3, CD24, DPP4, C2, HLA-DRA, BTG1, KCNN4, FYB1, C7, LTBR, DEFB1, GAS6, CCR9, MYC, BTG2, OASL, IL27RA, CD300C, CST7, CLU, C3AR1, LST1, AIF1, CRIP1, CFH, IL18, GEM, CCR5, GBP1, CD27, HLA-B, CCL4, CD53, KLF6, FAS, FCGR2A, PTGER4, MNDA, ST6GAL1, CSF3R…	C4	CM	Immune response.
MODULE_46	2.8222e-16	2.9221e-13	1.0377	-0.424742	-2.48992	284	CRLF1, SERPINF1, GNLY, IGF2, HLA-DRB5, CIITA, C1S, CFB, LILRB5, PPBP, CHIT1, SERPING1, NRP1, CEBPB, CCL19, GRN, CD6, ISG20, TGFBI, VTN, VIP, FN1, AQP9, DAB2, C1R, OPRK1, CSF3, CD24, DPP4, C2, HLA-DRA, BTG1, KCNN4, FYB1, C7, LTBR, DEFB1, GAS6, CCR9, MYC, OASL, IL27RA, CD300C, CST7, CLU, C3AR1, LST1, CRIP1, CFH, IL18, GEM, CCR5, GBP1, CD27, HLA-B, CCL4, IFNGR2, CD53, KLF6, FAS, FCGR2A, PTGER4, MNDA…	C4	CM	Genes in the cancer module 46.
MODULE_47	3.57055e-16	3.55475e-13	1.0377	-0.469339	-2.65304	212	COL1A1, LTBP2, FRZB, SERPINF1, ACTG2, CYP1B1, TAGLN, FGFR1, ACTA2, CLIP3, COL1A2, GAS1, SCG5, MYL9, COL6A2, DES, PCOLCE, COL3A1, C1S, AKR1C1, COL6A3, COL18A1, FBLN2, PLAGL1, ADAMTS1, SERPING1, IGFBP4, THBS1, ISLR, TGFBI, SIRT3, FN1, IGFBP3, DAB2, C1R, MLLT11, NNMT, KDELR3, COL15A1, GJB2, PLAU, CTSK, PDPN, CNN2, SV2B, CLEC3B, PTGIS, DKK3, COL12A1, ECM1, GAS6, LAMB1, COL4A2, COL4A1, LOX, FBLN1, JUN…	C4	CM	ECM and collagens.
AIZARANI_LIVER_C21_STELLATE_CELLS_1	4.58334e-16	4.39407e-13	1.02767	-0.488137	-2.70156	186	COL1A1, MFAP4, SERPINF1, FBLN5, COL14A1, ACTA2, COL1A2, SOCS3, GGT5, MYL9, ADAMTS2, TPM4, COL6A2, PCOLCE, COL3A1, C1S, COL6A3, INMT, FBLN2, MGP, ADAMTS1, HLA-DRB1, IGFBP4, CEBPB, THBS1, CPXM2, VCL, DCN, LAMC1, CITED2, CDC42EP3, C1QTNF1, IGFBP3, C1R, CAVIN3, OLFML3, DEPP1, DKK3, C7, LAMB1, MYC, BTG2, COL4A2, COL4A1, NR2F2, CEBPD, CFH, GEM, PRSS23, C11orf96, FBLN1, NEXN, IER3, MAP1B, MMP2, LAMC3, L…	C8
HALLMARK_EPITHELIAL_MESENCHYMAL_TRANSITION	1.22464e-15	1.13213e-12	1.01754	-0.485531	-2.68642	185	COL1A1, FMOD, CRLF1, FBLN5, TAGLN, ITGA5, ACTA2, COL1A2, FOXC2, ABI3BP, GAS1, TPM2, MATN3, MYL9, TPM4, COL6A2, PPIB, PCOLCE, COL3A1, COL6A3, FBLN2, MGP, PDLIM4, IGFBP4, THBS1, LAMC2, TGFBI, DCN, LAMC1, PVR, ELN, GADD45B, CAP2, FN1, IGFBP3, DAB2, IGFBP2, NNMT, IL32, COL12A1, ECM1, COLGALT1, PCOLCE2, COL4A2, COL4A1, VEGFA, NID2, GEM, LAMA2, COPA, CTHRC1, SGCG, LOX, FBLN1, JUN, TPM1, FAS, MMP2, COL8…	H		Genes defining epithelial-mesenchymal transition, as in wound healing, fibrosis and metastasis.
MODULE_2	1.34213e-15	1.19797e-12	1.01754	-0.3862	-2.31791	354	HLA-DQA1, ULK1, HLA-DQB1, SLPI, CRABP1, LTBP2, MFAP4, ACTG2, CYP1B1, IGF2, FGFR1, CD151, CLIP3, COL1A2, MYH11, GOT1, TPM2, ADH1B, MYL9, COL6A2, PCOLCE, COL3A1, C1S, AKR1C1, COL6A3, FBLN2, PDLIM4, AOC3, IGFBP6, IGFBP4, INA, ANXA1, TGFBI, SLC29A1, MOAP1, CYB5A, TBC1D9, EPB41L3, CAP2, FN1, IGFBP3, LEPR, MLLT11, NNMT, CSF3, COL15A1, SV2B, CD24, CLEC3B, DEPP1, C7, SERPINA3, LAMB1, LMO4, S100A4, COL4A1…	C4	CM	DRG (dorsal root ganglia) genes.
RUBENSTEIN_SKELETAL_MUSCLE_FBN1_FAP_CELLS	3.68286e-15	3.1119e-12	0.996986	-0.425107	-2.47844	266	SLPI, COL1A1, AP3S1, MFAP4, SERPINF1, FBLN5, NDFIP1, FGFR1, COL14A1, COL1A2, ABI3BP, GAS1, OLFML2A, RPS27L, COL6A2, PCOLCE, SCARA5, COL3A1, C1S, COL6A3, FBLN2, MGP, IGFBP6, SERPING1, TXN, ARL6IP5, ANXA1, ISLR, MEDAG, DCN, F10, HTRA3, ANXA11, ELN, JAG1, FN1, PROCR, DAB2, C1R, CLIC1, CAVIN3, OAZ1, OLFML3, UGP2, CTSK, TUBB, HNRNPF, PTGIS, COL12A1, TMEM109, RBMS1, CKS1B, RNF7, DEFB1, ALDOA, UAP1, S10…	C8
NABA_MATRISOME	3.72683e-15	3.1119e-12	0.996986	-0.309908	-1.99207	702	CCL28, MUC20, SLPI, COL1A1, FMOD, HAPLN4, CRLF1, CTSV, LTBP2, MFAP4, COCH, FRZB, SERPINF1, FBLN5, HYAL3, NELL2, OGN, IGF2, TNFSF8, COL14A1, COL8A1, CLEC2A, COL1A2, ABI3BP, MATN3, SLIT1, ADAM28, WNT3, THSD4, BMP3, ADAMTS2, COL6A2, PCOLCE, ITIH2, CTSB, COL3A1, ADAMTS15, COL6A3, COL18A1, CLEC2L, FBLN2, MGP, NTN4, ADAM22, ADAMTS1, CCN4, PPBP, GDF10, IGFBP6, SERPING1, IGFBP4, CCL19, THBS1, ANXA1, F13A…	C2	CP	Ensemble of genes encoding extracellular matrix and extracellular matrix-associated proteins
DESCARTES_FETAL_ADRENAL_STROMAL_CELLS	7.21196e-15	5.8338e-12	0.986546	-0.566873	-2.85809	107	BICC1, COL1A1, FMOD, ACTG2, CYP1B1, OGN, ITGBL1, TAGLN, ACTA2, ABI3BP, MYH11, ADH1B, OSR1, TBX18, PCOLCE, SCARA5, COL3A1, ADAMTS15, COL6A3, MGP, CCN4, IGFBP6, ANO1, ISLR, DCN, IGFBP3, C1R, FHL5, KDELR3, DKK2, GJB2, BMP4, COL12A1, C7, PCDH18, SULF1, SGCG, LOX, FOXS1, LAMC3, LUM, ZNF385D, RSPO3, PODN, TWIST2, ADRA1D, PRELP, EDNRA, POSTN, GLP2R, MEOX2, CDH11, PRICKLE1, CCDC80	C8		descartes DE_gene_by_organ.csv, fold.change>5, qval<0.05, pval<0.05
MODULE_38	1.67612e-14	1.31473e-11	0.975995	-0.367486	-2.23968	399	COL1A1, CRABP1, LTBP2, MFAP4, ACTG2, IGF2, FGFR1, ITGA5, DSP, CD151, COL1A2, MYH11, GAS1, ARID3A, RAB11FIP5, TPM2, FCGR2B, GLRX, MYL9, HOPX, COL6A2, PCOLCE, COL3A1, COL6A3, FBLN2, LGMN, IGFBP4, ANXA1, SPINK2, GRN, F13A1, AGPAT2, SLC38A10, TGFBI, CITED2, SLC29A1, ELN, JAG1, FN1, IGFBP3, PROCR, DAB2, MAP2K3, IGFBP2, IL32, COL15A1, PLAU, PDPN, PLK3, CLEC3B, DEPP1, EFNA1, TMED3, C2, ECM1, KCNN4, KRT1…	C4	CM	Placenta genes.
TRAVAGLINI_LUNG_EREG_DENDRITIC_CELL	3.99584e-14	3.04111e-11	0.965328	-0.329653	-2.07721	539	HLA-DQA1, PEA15, RPS26, HLA-DQB1, TLNRD1, ITGA5, TNFSF8, SPHK1, HLA-DRB5, SOCS3, OTUD1, FCGR2B, TPM4, CTSB, CDV3, RAB8B, GPX1, LGMN, QPCT, HLA-DRB1, ADIPOR1, CEBPB, THBS1, RNF149, RNF19B, VAMP8, F13A1, AKAP13, TGFBI, FCGR1A, PIK3R5, GNA15, PDLIM7, PLEK, SUMO3, GADD45B, EPB41L3, MS4A6A, STK24, MRC1, MAP2K3, CLIC1, IFI30, ARRB2, GNS, IL10, PLAU, FGL2, HLA-DRA, RBMS1, KCNN4, HCK, GNAI2, TCN2, TUBA1C…	C8
MODULE_45	4.11199e-14	3.04111e-11	0.965328	-0.33805	-2.10259	489	HLA-DQB1, SLPI, CRABP1, STAT4, GNLY, CYP1B1, ITGA5, SLC19A1, CHST15, ARID3A, FCGR2B, GLRX, HTR7, PCOLCE, TP53I11, LILRB5, PPBP, SULT4A1, QPCT, ARL6IP5, ANXA1, GRN, F13A1, CD6, MPPED1, ISG20, TGFBI, SECTM1, ADCY7, IQGAP2, STAT6, PLEK, ELN, TBC1D9, AQP9, TNFAIP8, MAP2K3, IL32, PLK3, FGL2, CARD10, C2, VAV1, SLA, FYB1, HTR2A, SEMA6C, CD300A, HCK, CPD, LMO4, OASL, IL27RA, S100A4, TNFAIP2, CD300C, CST7…	C4	CM	Whole blood genes.
REN_ALVEOLAR_RHABDOMYOSARCOMA_DN	4.43296e-14	3.18742e-11	0.965328	-0.369704	-2.23451	373	PEA15, COL1A1, FBLN5, ITGBL1, ITGA5, COL8A1, ATP10D, CD151, SPHK1, CEMIP, TSPAN4, RAB11FIP5, KLF2, GLRX, ADAMTS2, PDCD6, TPM4, COL6A2, FZD2, PCOLCE, CTSB, C1S, CAPZB, IGFBP6, QPCT, NRP1, THBS1, ANXA1, GRN, LPP, B4GALT1, TGFBI, LAMC1, TGFB1I1, STAT6, TMEM43, FN1, IGFBP3, SSH1, DAB2, CLIC1, DUSP14, NNMT, KDELR3, GNS, PLAU, CNN2, TMED3, ECM1, BAG3, GAS6, VAT1, GNAI2, UAP1, SCPEP1, CLU, ANXA2, MBNL1,…	C2	CGP	Genes commonly down-regulated in human alveolar rhabdomyosarcoma (ARMS) and its mouse model overexpressing PAX3-FOXO1 [GeneID=5077;2308] fusion.
DESCARTES_FETAL_EYE_MICROGLIA	5.42669e-14	3.79648e-11	0.965328	-0.515602	-2.71072	132	ADAM28, LYVE1, RASGEF1C, LGMN, HLA-DRB1, F13A1, PIK3R5, ADCY7, PLEK, MS4A6A, PLD4, ARHGAP15, PLK3, HLA-DRA, VAV1, FYB1, HCK, RUNX1, LAPTM5, MYO1F, RHBDF2, TBXAS1, CD163L1, LCP1, DOCK2, PRAM1, SPI1, CYTH4, FGD2, RHOH, CDCA5, STAB1, ARHGAP25, PTPRC, ITGAM, ST6GAL1, CSF3R, TRAF3IP3, SMAP2, CSF1R, ITGAL, RNASET2, RGS1, LAT2, CD84, AOAH, GLIPR1, CD37, CD74, NCKAP1L, APBB1IP, ADAP2, FGD3, ARHGAP30, GMI…	C8		descartes DE_gene_by_organ.csv, fold.change>5, qval<0.05, pval<0.05
RODWELL_AGING_KIDNEY_UP	6.07035e-14	4.13503e-11	0.954542	-0.351358	-2.15532	431	CD47, HLA-DQA1, HLA-DQB1, COL1A1, PARP12, PIK3CG, CDO1, TAGLN, COL14A1, COL1A2, SOCS3, CHST15, HTR7, GGT5, RPS27L, COL3A1, C1S, CFB, RAB8B, QPCT, HLA-DRB1, SERPING1, GRN, ISLR, PFN1, EHBP1L1, TGFBI, SHISA5, STAT6, CCN3, HCST, TMEM43, MS4A6A, FN1, MRC1, C1R, CLIC1, JAML, NNMT, IL32, COL15A1, DKK3, TMED3, HLA-DRA, FYB1, LASP1, C7, LTBR, STK10, PCDHA9, TNFAIP2, RGS10, LST1, TMSB10, CRIP1, FHOD1, LAP…	C2	CGP	Genes whose expression increases with age in normal kidney.
GAO_LARGE_INTESTINE_ADULT_CJ_IMMUNE_CELLS	1.20367e-13	7.92451e-11	0.943632	-0.343611	-2.11721	448	PLVAP, COL1A1, TRPV2, LTBP2, MFAP4, SERPINF1, FBLN5, SLC24A3, FGFR1, ITGA5, COL14A1, ACTA2, COL1A2, ABI3BP, TSPAN4, OLFML2A, TPM2, ADH1B, ADAM28, RYR3, GGT5, MYL9, COL6A2, PCOLCE, SCARA5, COL3A1, C1S, COL6A3, COL18A1, MGP, FXYD6, RAB8B, PDLIM4, ADAMTS1, AOC3, IGFBP6, SERPING1, NRP1, FGD5, ANXA1, ISLR, TGFBI, DCN, LAMC1, F10, TUBB6, PDLIM7, PLEK, OBSCN, ARL10, IGFBP3, PROCR, C1R, CAVIN3, NNMT, LHF…	C8
DESCARTES_FETAL_CEREBRUM_MICROGLIA	1.22457e-13	7.92451e-11	0.943632	-0.374537	-2.24537	350	PLVAP, BATF3, LILRA4, SLC47A1, SERPINF1, TNFSF8, SLC17A9, ADAM28, CACNA2D4, CTSB, LYVE1, MYO7A, LILRB5, CHIT1, LGMN, RNF149, MR1, B4GALT1, CD180, FCGR1A, PIK3R5, GCNT2, TAGAP, MS4A6A, TFCP2L1, IFI30, ARRB2, PLD4, LRMDA, ARHGAP15, IL10, ALOX15B, APOBR, CD300LF, DENND1C, C2, VAV1, BLNK, IGSF10, IL12RB1, NINJ1, AIF1, MYO1F, IL18, NCF1, RASGRP4, MEFV, RCN3, PARVG, DOCK2, PRAM1, SPI1, CYTH4, FGD2, CD6…	C8		descartes DE_gene_by_organ.csv, fold.change>5, qval<0.05, pval<0.05
MODULE_6	1.3127e-13	8.2876e-11	0.943632	-0.370476	-2.21698	347	HLA-DQB1, SLPI, FMOD, CRABP1, MFAP4, ACTG2, CYP1B1, FGFR1, DSP, CD151, COL1A2, MYH11, GAS1, CYP1A1, EPCAM, TPM2, MYL9, UPK1B, COL6A2, PCOLCE, C1S, AKR1C1, COL6A3, FBLN2, CFB, PDLIM4, IGFBP6, LGMN, IGFBP4, ANXA1, SPINK2, GRN, AGPAT2, CD6, TGFBI, CITED2, GADD45B, CYB5A, FN1, IGFBP3, MAP2K3, IGFBP2, NNMT, PLK3, CD24, CLEC3B, DEPP1, EFNA1, TMED3, C2, KCNN4, KRT18, DEFB1, SERPINA3, CPD, LMO4, S100A4, …	C4	CM	Trachea genes.
CHICAS_RB1_TARGETS_CONFLUENT	1.40985e-13	8.68901e-11	0.943632	-0.330581	-2.07067	516	PEA15, COL1A1, TRPV2, LTBP2, MFAP4, FRZB, SERPINF1, ACTG2, EIF4EBP1, ITGBL1, TAGLN, ITGA5, ACTA2, CLIP3, COL1A2, JPT1, PAK1, FOXC2, ABI3BP, FKBP9, OLFML2A, TPM2, ADH1B, ASS1, THSD4, LMO7, MYL9, ADAMTS2, COL6A2, FZD2, STMN3, PCOLCE, COL3A1, C1S, CAPZB, NTN4, UBE2V1, CCN4, IGFBP6, BRIP1, SERPING1, NRP1, THBS1, ANXA1, ANO1, LPP, ATP2B4, DCN, NPTX1, TUBB6, PDLIM7, RGS17, CDC42EP3, CYB5A, FN1, C1R, CA…	C2	CGP	Genes up-regulated in confluent IMR90 cells (fibroblast) after knockdown of RB1 [GeneID=5925] by RNAi.
GOCC_SECRETORY_GRANULE	1.6258e-13	9.78692e-11	0.943632	-0.299807	-1.92689	701	NAPRT, SPESP1, CD47, VPS33B, CAND1, SLPI, COL1A1, ATP6V1D, PHACTR2, HYAL3, STX1A, IGF2, DSP, KRTDAP, SLC17A9, RAB11FIP5, SCG5, APP, PCSK1, RAB27B, POMC, CTSB, HSP90AB1, PSMD13, RAB3A, PPBP, STBD1, CHIT1, QPCT, SERPING1, SYT7, THBS1, SPINK2, RAB3D, GRN, ISLR, VAMP8, F13A1, IMPDH2, AGPAT2, B4GALT1, PATE4, VCL, FLOT2, IQGAP2, ANXA11, FN1, PSMD1, CTSA, GNS, PLAU, CNN2, FGL2, TUBB, SV2B, TRIM36, CLEC3…	C5	GO:CC	A small subcellular vesicle, surrounded by a membrane, that is formed from the Golgi apparatus and contains a highly concentrated protein destined for secretion. Secretory granules move towards the periphery of the cell and upon stimulation, their membranes fuse with the cell membrane, and their protein load is exteriorized. Processing of the contained protein may take place in secretory granules…
SMID_BREAST_CANCER_LUMINAL_B_DN	3.59875e-13	2.11713e-10	0.932595	-0.337461	-2.07196	439	HLA-DQA1, HLA-DQB1, SLPI, LILRA4, CRLF1, CRABP1, MFAP4, FRZB, GNLY, FBLN5, ACTG2, CYP1B1, IGF2, TAGLN, COL14A1, P2RX5, MYH11, ADH1B, APP, ASS1, CYP26B1, MARCO, PTGFR, LYVE1, C1S, DLX5, FOXC1, AKR1C1, FBLN2, PLAGL1, ADAMTS1, SERPING1, CCL19, ROPN1, ANXA1, ISG20, TNFRSF21, DCN, PTK7, CCN3, ELN, CHAC1, GRB14, WNT6, IGFBP3, LEPR, TNFAIP8, MRC1, SELE, NNMT, IL32, IGF2BP2, HLA-DOB, PDPN, NPR3, SV2B, DE…	C2	CGP	Genes down-regulated in the luminal B subtype of breast cancer.
FAN_OVARY_CL18_B_LYMPHOCYTE	3.91178e-13	2.25015e-10	0.932595	-0.349816	-2.13214	398	HLA-DQA1, RPS26, HLA-DQB1, LILRA4, AP3S1, HLA-DRB5, PAK1, KPNA2, TSPAN13, CTSB, HM13, GPX1, LGMN, HLA-DRB1, TXN, ARL6IP5, RNF149, CNPY3, GRN, VAMP8, PFN1, B4GALT1, BID, AKAP13, ISG20, TNFRSF21, GNA15, TUBB6, PLEK, ANXA11, NAA50, HCST, MS4A6A, ISCA1, MAP2K3, JAML, CACYBP, PLD4, TES, ARPC2, SRSF7, PSMB3, HLA-DRA, AKIRIN2, EIF5A, EMC3, PHACTR1, NINJ1, VCP, CRIP1, LAPTM5, ATP6V1B2, NCF1, YWHAZ, M6PR,…	C8		The ovaries analyzed showed a pronounced population of CD53high/CXCR4high immune cells (Fig. 2e), including separate clusters for adaptive T lymphocytes and Natural Killer (NK) cells (CL4 and CL12), B lymphocytes (CL18), and innate immune system, such as monocytes and macrophages (CL13)
GOCC_SECRETORY_VESICLE	5.11396e-13	2.87771e-10	0.921426	-0.280935	-1.83324	844	NAPRT, SPESP1, CD47, GABRA2, VPS33B, CAND1, SLPI, COL1A1, ATP6V1D, SLC32A1, PHACTR2, APBA1, BRSK1, HYAL3, STX1A, DLG4, IGF2, DSP, KRTDAP, SLC17A9, RAB11FIP5, SCG5, APP, PCSK1, RAB27B, POMC, CTSB, HSP90AB1, RAB8B, PSMD13, RAB3A, PPBP, STBD1, CHIT1, QPCT, SERPING1, SYT7, THBS1, SPINK2, RAB3D, GRN, ISLR, VAMP8, F13A1, IMPDH2, AGPAT2, B4GALT1, PATE4, VCL, FLOT2, OTOF, IQGAP2, TRIM9, ANXA11, COPS4, UN…	C5	GO:CC	A cytoplasmic, membrane bound vesicle that is capable of fusing to the plasma membrane to release its contents into the extracellular space. [GOC:dos]
RUBENSTEIN_SKELETAL_MUSCLE_FAP_CELLS	5.35781e-13	2.95078e-10	0.921426	-0.471942	-2.56947	164	COL1A1, AP3S1, MFAP4, SERPINF1, FBLN5, NDFIP1, COL1A2, TSPAN4, ADH1B, APP, COL6A2, PPIB, PCOLCE, COL3A1, C1S, COL6A3, FBLN2, MGP, IGFBP6, SERPING1, ARL6IP5, ANXA1, ISLR, DCN, LAMC1, HTRA3, CYB5A, FN1, DAB2, C1R, LHFPL6, COL15A1, KDELR2, FGL2, CKS1B, SSR2, S100A4, CFD, CFH, ANXA2, LAMA2, FMO2, NUPR1, FBLN1, HSPG2, S100A11, APOD, PGF, MAP1B, S100A10, MMP2, SMOC2, LUM, CXCL12, NPC2, PODN, C3, DHRS7,…	C8
TRAVAGLINI_LUNG_OLR1_CLASSICAL_MONOCYTE_CELL	1.40248e-12	7.56317e-10	0.91012	-0.297371	-1.90619	677	BATF3, PRNP, PEA15, RPS26, TLNRD1, ITGA5, TNFSF8, SPHK1, SOCS3, OTUD1, CHST15, TPM4, CTSB, CDV3, RAB8B, GPX1, QPCT, CEBPB, THBS1, RNF19B, GPR35, PFN1, BID, EHBP1L1, TGFBI, B4GALT5, FCGR1A, PIK3R5, GNA15, PDLIM7, PLEK, TIMM17A, GADD45B, EPB41L3, STK24, AQP9, TNFAIP8, MAP2K3, CLIC1, IFI30, ARRB2, KDELR2, IL10, PLK3, RBMS1, KCNN4, SLA, HCK, CPD, TCN2, UAP1, RUNX1, TNFAIP2, CFD, NIBAN2, RGS10, NINJ1,…	C8
NABA_CORE_MATRISOME	1.82673e-12	9.64998e-10	0.898671	-0.427275	-2.41653	215	COL1A1, FMOD, HAPLN4, LTBP2, MFAP4, COCH, FBLN5, NELL2, OGN, COL14A1, COL8A1, COL1A2, ABI3BP, MATN3, SLIT1, THSD4, COL6A2, PCOLCE, COL3A1, COL6A3, COL18A1, FBLN2, MGP, NTN4, CCN4, IGFBP6, IGFBP4, THBS1, LAMC2, NTN1, TGFBI, DCN, LAMC1, VTN, CCN3, ELN, FN1, IGFBP3, IGFBP2, COL15A1, FGL2, VWDE, SNED1, COL12A1, ECM1, GAS6, LAMB1, PCOLCE2, COL4A2, IGSF10, COL4A1, NID2, LAMA2, CTHRC1, MMRN1, FBLN1, HSP…	C2	CP	Ensemble of genes encoding core extracellular matrix including ECM glycoproteins, collagens and proteoglycans
GOMF_EXTRACELLULAR_MATRIX_STRUCTURAL_CONSTITUENT	2.59151e-12	1.34163e-09	0.898671	-0.501077	-2.60621	125	COL1A1, FMOD, LTBP2, MFAP4, FBLN5, OGN, COL14A1, COL8A1, COL1A2, ABI3BP, MATN3, THSD4, COL6A2, PCOLCE, COL3A1, COL6A3, COL18A1, FBLN2, MGP, THBS1, LAMC2, TGFBI, DCN, LAMC1, VTN, ELN, FN1, COL15A1, FGL2, COL12A1, ECM1, LAMB1, COL4A2, COL4A1, NID2, LAMA2, CTHRC1, MMRN1, FBLN1, HSPG2, COL8A2, COL13A1, LUM, MMRN2, PODN, CCN1, PXDN, CD4, LTBP1, IMPG1, PRELP, POSTN, SBSPON, TNXB, ZP3, EMILIN2, LAMB3, T…	C5	GO:MF	The action of a molecule that contributes to the structural integrity of the extracellular matrix. [GOC:mah]
GOCC_ENDOPLASMIC_RETICULUM_LUMEN	3.02495e-12	1.53531e-09	0.898671	-0.394328	-2.28314	255	COL1A1, COL14A1, COL8A1, COL1A2, MATN3, WNT3, APP, COL6A2, PPIB, CASQ2, ITIH2, COL3A1, ARSK, COL6A3, COL18A1, SRL, SERPING1, IGFBP4, THBS1, CNPY3, GANAB, RCN1, LAMC1, F10, SHISA5, WNT6, TMEM43, FN1, IGFBP3, MIA3, COL15A1, BMP4, COL12A1, HRC, COLGALT1, GAS6, ADAMTSL1, LAMB1, CES3, COL4A2, COL4A1, CLU, ERAP2, SERPIND1, TOR1A, MBTPS1, PRSS23, RCN3, APLP2, PDIA4, ERO1A, PDGFD, LRPAP1, MEN1, COL8A2, C…	C5	GO:CC	The volume enclosed by the membranes of the endoplasmic reticulum. [ISBN:0198547684]
SMID_BREAST_CANCER_NORMAL_LIKE_UP	3.39307e-12	1.68903e-09	0.898671	-0.345528	-2.10054	388	HLA-DQB1, LILRA4, MFAP4, CDO1, FRZB, FBLN5, CYP1B1, DEF6, COL14A1, ACTA2, P2RX5, CIITA, MYH11, SIGLEC1, ADH1B, ADAM28, GGT5, DES, LYVE1, C1S, COL18A1, AOC3, HLA-DRB1, SERPING1, CCL19, F13A1, CD6, CD180, ISG20, DCN, F10, GDF7, MATK, ADARB1, MS4A6A, LEPR, TNFAIP8, MRC1, C1R, SELE, LHFPL6, PNOC, ARHGAP15, TMOD1, HLA-DOB, APOBEC3G, CLEC3B, DEPP1, DPP4, HLA-DRA, RBMS1, SLA, FYB1, C7, RRN3, TEP1, STK10…	C2	CGP	Genes up-regulated in the normal-like subtype of breast cancer.
GOBP_REGULATION_OF_CELL_ADHESION	4.58362e-12	2.23862e-09	0.887075	-0.302639	-1.92782	624	CCL28, CD47, PRNP, HLA-DQA1, HLA-DQB1, COL1A1, PIK3CG, ARG2, PLEKHA2, NDFIP1, CYP1B1, FLCN, IGF2, NCK2, ITGA5, COL8A1, HLA-DRB5, FOXC2, ABI3BP, EPCAM, FCGR2B, ASS1, LMO7, ROCK2, PHLDB2, KDR, PRKAR1A, FBLN2, ADAM22, HLA-DRB1, NRP1, CEBPB, CCL19, THBS1, ANXA1, CD6, VCL, TGFBI, TNFRSF21, FLOT2, POLDIP2, PLXNC1, CITED2, VTN, CD209, RCC2, GCNT2, JAG1, C1QTNF1, FN1, MIA3, DAB2, IGFBP2, SELE, PIK3CB, IL…	C5	GO:BP	Any process that modulates the frequency, rate or extent of attachment of a cell to another cell or to the extracellular matrix. [GOC:mah]
GOBP_REGULATION_OF_CELLULAR_COMPONENT_MOVEMENT	6.30968e-12	3.02456e-09	0.887075	-0.269528	-1.76191	872	PLVAP, CCL28, ZNF304, CD47, COL1A1, PIK3CG, YTHDF1, SSX2IP, MADCAM1, SERPINF1, CYP1B1, FLCN, FGFR1, ITGA5, DSP, ACTA2, CD151, SPHK1, PAK1, FOXC2, CEMIP, ABI3, APP, PDCD6, ROCK2, RAB25, PHLDB2, TRIM58, COL3A1, LYVE1, KDR, PKP2, MCU, ADAMTS1, CCN4, LGMN, ADIPOR1, NRP1, CCL19, THBS1, ANXA1, GRN, APEX1, LAMC2, PFN1, NTN1, ATP2B4, VCL, ERBB4, DCN, F10, PLXNC1, CITED2, VTN, RCC2, GCNT2, CCN3, MYO1C, JA…	C5	GO:BP	Any process that modulates the frequency, rate or extent of the movement of a cellular component. [GOC:ai, GOC:dph, GOC:jl]
BOQUEST_STEM_CELL_CULTURED_VS_FRESH_UP	6.96353e-12	3.27729e-09	0.887075	-0.341718	-2.07683	389	CRLF1, MFAP4, COCH, CDO1, FRZB, SERPINF1, CYP1B1, MARK1, NELL2, SLC38A1, COL14A1, DSP, CEMIP, ABI3BP, OLFML2A, TPM2, FAM13A, ADH1B, SCG5, GGT5, LMO7, CYP26B1, TPM4, AKR1C1, COL18A1, MGP, ADAM22, CDK1, AOC3, GDF10, THBS1, ANO1, YARS1, AKAP13, DCN, F10, CDC42EP3, GADD45B, FN1, DKK2, COL15A1, CTSK, FGL2, NPR3, SRSF7, CLEC3B, DEPP1, KRT18, SERPINA3, SOX4, MYC, TPX2, BTG2, OASL, MAN1C1, ABCC4, CD302, …	C2	CGP	Genes up-regulated in cultured stromal stem cells from adipose tissue, compared to the freshly isolated cells.
CUI_DEVELOPING_HEART_C3_FIBROBLAST_LIKE_CELL	8.68842e-12	4.01607e-09	0.875325	-0.53412	-2.67537	103	BICC1, COL1A1, MFAP4, FRZB, SERPINF1, FBLN5, OGN, COL14A1, COL1A2, ADAMTS2, COL6A2, PCOLCE, COL6A3, FBLN2, MGP, PLAGL1, SERPING1, ISLR, TGFBI, DCN, RCN1, LAMC1, HTRA3, ELN, C1R, OLFML3, IL32, COL15A1, COL12A1, C7, LAMB1, PCDH18, RCN3, NUPR1, LOX, FBLN1, MMP2, SMOC2, LUM, CXCL12, FSTL1, CCN2, MRC2, KCTD12, SERPINE2, PLAC9, GLT8D2, LGALS1, SDC2, SPRY1, SNAI2, RRBP1, LAMA4, MXRA8	C8
MODULE_44	1.15418e-11	5.2414e-09	0.875325	-0.378953	-2.21717	282	HLA-DQA1, HLA-DQB1, SLPI, CYP1B1, FGFR1, DSP, COL1A2, GAS1, ADH1B, COL6A2, C1S, COL6A3, CDV3, LGMN, IGFBP4, CCL19, GRN, F13A1, CD6, ISG20, TGFBI, EPB41L3, FN1, IGFBP3, TNFAIP8, DAB2, MRC1, IGFBP2, IL32, FGL2, CLEC3B, C2, SLA, FYB1, KRT18, C7, SOX4, LMO4, IL27RA, S100A4, COL4A1, CFD, RGS10, H2BC12, CRIP1, LAPTM5, TNFRSF1B, M6PR, MBNL1, GPSM3, SP100, LCP1, DOCK2, NUPR1, HSPG2, CRHR2, S100A11, RHOH,…	C4	CM	Thymus genes.
GOCC_COLLAGEN_CONTAINING_EXTRACELLULAR_MATRIX	1.76116e-11	7.85995e-09	0.863415	-0.357267	-2.13589	337	SLPI, COL1A1, FMOD, LTBP2, MFAP4, COCH, SERPINF1, FBLN5, OGN, COL14A1, COL8A1, CD151, COL1A2, ABI3BP, MATN3, THSD4, ADAMTS2, COL6A2, PCOLCE, ITIH2, CTSB, COL3A1, ADAMTS15, COL6A3, COL18A1, FBLN2, MGP, NTN4, ADAMTS1, GDF10, SERPING1, THBS1, ANXA1, F13A1, LAMC2, NTN1, TGFBI, DCN, LAMC1, VTN, TGFB1I1, CCN3, ANXA11, ELN, FN1, COL15A1, ATRN, FGL2, CLEC3B, COL12A1, ECM1, SERPINA3, LAMB1, S100A4, COL4A2…	C5	GO:CC	An extracellular matrix consisting mainly of proteins (especially collagen) and glycosaminoglycans (mostly as proteoglycans) that provides not only essential physical scaffolding for the cellular constituents but can also initiate crucial biochemical and biomechanical cues required for tissue morphogenesis, differentiation and homeostasis. The components are secreted by cells in the vicinity and …
VERHAAK_GLIOBLASTOMA_MESENCHYMAL	1.98252e-11	8.69791e-09	0.863415	-0.416781	-2.35122	209	COL1A1, LTBP2, ITGA5, COL1A2, FCGR2B, CTSB, IGFBP6, NRP1, CEBPB, THBS1, ANXA1, GRN, TGFBI, GNA15, STAT6, PROCR, TNFAIP8, DAB2, CLIC1, IFI30, TES, PLAU, PDPN, PLK3, CNN2, RBMS1, MAPK13, COLGALT1, LAMB1, UAP1, SCPEP1, S100A4, FHOD1, LAPTM5, TNFRSF1B, MYO1F, ANXA2, MAN1A1, LRRFIP1, SP100, CCR5, LCP1, COPZ2, ARPC1B, CYTH4, TNFRSF1A, LOX, S100A11, STAB1, MFSD1, PTPRC, ITGAM, THBD, STXBP2, FCGR2A, PTPN…	C2	CGP	Genes correlated with mesenchymal type of glioblastoma multiforme tumors.
MARKEY_RB1_ACUTE_LOF_DN	2.04072e-11	8.80401e-09	0.863415	-0.420583	-2.36006	202	AP3S1, OGN, SPHK1, SOCS3, FCGR2B, APP, GLRX, CRABP2, ALDH1A2, CPXM1, CTSB, RAB8B, LILRB5, LGMN, SERPING1, RAB3D, GRN, BID, CPXM2, ISG20, TGFBI, FCGR1A, GCNT2, IGFBP3, PROCR, NPR3, C2, VAV1, MKRN1, HCK, B3GNT2, CD300C, C3AR1, LST1, ATP6V1B2, NCF1, SP100, CCL5, LCP1, TRIM5, UBA7, NUPR1, APOD, STAB1, HLA-B, PTPRC, ITGAM, ERO1A, LYL1, PTPN6, TYROBP, CCL3, CSF1R, LAT2, ADGRE1, SOD2, CASP4, HLA-E, DHRS…	C2	CGP	Genes down-regulated in adult fibroblasts with inactivated RB1 [GeneID=5925] by Cre-lox: acute loss of function (LOF) of RB1.
REACTOME_CYTOKINE_SIGNALING_IN_IMMUNE_SYSTEM	2.73378e-11	1.16006e-08	0.863415	-0.294102	-1.86984	595	H3C12, HLA-DQA1, HLA-DQB1, PSMD4, CRLF1, STAT4, CREB1, STX1A, TNFSF8, IRF6, COL1A2, HLA-DRB5, SOCS3, CIITA, KPNA2, APP, PSMA7, IL17RE, POMC, UBE2V1, PSMD13, HLA-DRB1, CCL19, ANXA1, F13A1, OPRM1, EIF4A1, ISG20, FCGR1A, STAT6, FN1, PSMD1, H3C6, MAP2K3, IFI30, PIK3CB, MAP3K14, IL32, CSF3, IL10, UBE2N, CNN2, HNRNPF, PSMB3, HLA-DRA, VAV1, NUP50, SLA, LTBR, RNF7, IL1RL2, MAP2K6, HCK, UBC, BLNK, MYC, OA…	C2	CP:REACTOME	Cytokine Signaling in Immune system
AIZARANI_LIVER_C2_KUPFFER_CELLS_1	3.1591e-11	1.31892e-08	0.851339	-0.427401	-2.37147	188	HLA-DQA1, HLA-DQB1, HLA-DRB5, CIITA, FCGR2B, ADAM28, CTSB, GPX1, HLA-DRB1, ANXA1, GRN, F13A1, TGFBI, PLEK, MS4A6A, MRC1, JAML, ARRB2, PLD4, NR4A3, FGL2, HLA-DRA, HCK, PHACTR1, RGS10, C3AR1, LST1, TMSB10, AIF1, LAPTM5, ATP6V1B2, TNFRSF1B, IL18, TBXAS1, CYRIB, PARVG, ARPC1B, FGD2, IER3, S100A11, MFSD1, SYK, POU2F2, FCGR2A, LRRC25, MNDA, TYROBP, SMAP2, CSF1R, LGALS9, RNASET2, RGS1, CD84, NPC2, RNF14…	C8
AIZARANI_LIVER_C6_KUPFFER_CELLS_2	3.52732e-11	1.44928e-08	0.851339	-0.405294	-2.29334	216	HLA-DQA1, MARCO, CTSB, LYVE1, LILRB5, GPX1, LGMN, HLA-DRB1, CEBPB, CNPY3, GRN, VAMP8, F13A1, TGFBI, SECTM1, PLEK, EPB41L3, MS4A6A, DAB2, MRC1, ARRB2, FGL2, HLA-DRA, SLA, FYB1, COLGALT1, HCK, GNAI2, TNFAIP2, CFD, C3AR1, LST1, TMSB10, AIF1, LAPTM5, ATP6V1B2, TNFRSF1B, IL18, ACTB, TBXAS1, SPI1, ARPC1B, FGD2, IER3, S100A11, MFSD1, RAP2B, CCL4, IFNGR2, POU2F2, FCGR2A, LRRC25, FOLR2, TYROBP, NAGK, CSF1…	C8
PETROVA_ENDOTHELIUM_LYMPHATIC_VS_BLOOD_DN	3.61331e-11	1.46141e-08	0.851339	-0.467246	-2.50851	149	PRNP, LTBP2, TAGLN, ITGA5, COL8A1, ACTA2, COL1A2, TPM2, PDLIM4, ARL6IP5, LAMC2, TGFBI, TNFRSF21, RCN1, NPTX1, STAT6, CDC42EP3, GLCE, CAP2, PROCR, MLLT11, SELE, NNMT, IL32, PLAU, TCN2, BTG2, UAP1, CLU, RGS10, NR2F2, JUN, IER3, PGF, TPM1, BMP6, LYL1, UCHL1, TRAM2, ADGRG6, CCRL2, SLC3A2, SGSH, BASP1, RGS4, CDKN1A, HMOX1, ARHGDIB, PLOD1, RRAS, MT1H, GBP2, EMP3, ATP1B1, EPS8, TGM2, ENO2, CTSC, ANPEP, …	C2	CGP	Genes down-regulated in BEC (blood endothelial cells) compared to LEC (lymphatic endothelial cells).
DELYS_THYROID_CANCER_UP	5.45299e-11	2.17155e-08	0.851339	-0.337712	-2.05681	396	APOC2, SLPI, COL1A1, CRLF1, CYP1B1, NELL2, LSR, DSP, COL8A1, CD151, SLC17A9, SLIT1, SCG5, CRABP2, MARCO, CTSB, COL3A1, CFB, PDLIM4, CHIT1, GPX1, IGFBP6, QPCT, THBS1, PSD3, ANXA1, VAMP8, LAMC2, BID, TNFRSF21, PLXNC1, PTK7, ATIC, SPINT1, MS4A6A, FN1, IGFBP3, CTSA, MRC1, IFI30, MLLT11, KDELR3, IGF2BP2, ALOX15B, PLAU, PLK3, DPP4, C2, ECM1, KCNN4, SEMA3F, MAPK13, ABCC6, SOX4, CPD, RUNX1, S100A4, NINJ1…	C2	CGP	Genes up-regulated in papillary thyroid carcinoma (PTC) compared to normal tissue.
ENK_UV_RESPONSE_KERATINOCYTE_UP	6.36213e-11	2.49521e-08	0.839089	-0.317174	-1.96441	463	PAX8, CTH, STX16, GPS2, PEA15, ULK1, TAGLN, COX6B1, NXF1, EIF3C, CRABP2, UPK1B, FOXC1, HSP90AB1, SF3A1, PDLIM4, PPBP, IGFBP6, LGMN, QPCT, HLA-DRB1, HPCA, CEBPB, GRN, EIF3I, VAMP8, PFN1, EIF4A1, ISG20, CITED2, TIMM17A, MOAP1, SPINT1, GADD45B, ERGIC3, C1R, MAP2K3, IFI30, SND1, OAZ1, DUSP14, RER1, EFNA1, PSMB3, TMED3, ECM1, BTG1, KRT18, RPL19, MAPK13, VAT1, ALDOA, VCP, TNFRSF1B, EIF3K, ANXA2, H2BC14…	C2	CGP	Genes up-regulated in NHEK cells (normal epidermal keratinocytes) after UVB irradiation.
DURANTE_ADULT_OLFACTORY_NEUROEPITHELIUM_FIBROBLASTS_STROMAL_CELLS	9.41369e-11	3.63692e-08	0.839089	-0.576192	-2.72113	74	COL1A1, MFAP4, SERPINF1, CYP1B1, ITGBL1, TAGLN, ACTA2, COL1A2, TPM2, CRABP2, COL6A2, PCOLCE, COL3A1, C1S, INMT, MGP, IGFBP6, SERPING1, IGFBP4, TGFBI, DCN, C1R, ECM1, NR2F2, FBLN1, APOD, TPM1, LUM, SYNPO2, CCN1, GLIPR1, POSTN, CDH11, TGM2, RARRES2, IFITM3, LGALS1, TWIST1, AEBP1, IGFBP5, MXRA8, PRRX1, CCDC3, IGFBP7, SFRP2, GSN, AKAP12, SPARC, VIM, PTN, KCNE4, CH25H	C8
GRUETZMANN_PANCREATIC_CANCER_UP	1.0964e-10	4.17358e-08	0.839089	-0.346773	-2.0663	329	CD47, PRNP, SLPI, R3HDM1, COL1A1, ADSS2, CRABP2, GGT5, MYL9, PCOLCE, FBLN2, MGP, GPX1, LGMN, SLBP, ANXA1, GRN, PFN1, ISG20, FLOT2, RCN1, FN1, PLN, CLIC1, IFI30, NNMT, PLAU, CTSK, TUBB, PSMB3, C2, HLA-DRA, ECM1, G3BP1, FYB1, CKS1B, DLAT, LMO4, VDAC1, TMSB10, LAPTM5, YWHAZ, PTPN9, GEM, GBP1, APLP2, LCP1, DOCK2, PPP3CA, PRKDC, S100A11, PTPRC, TUSC3, SOD1, CD53, ARHGDIA, S100A10, ACVR1, MMP2, SPINT2,…	C2	CGP	Genes up-regulated in pancreatic ductal adenocarcinoma (PDAC) identified in a meta analysis across four independent studies.
BOQUEST_STEM_CELL_UP	1.23829e-10	4.64537e-08	0.826657	-0.392425	-2.23629	232	GSTM5, BICC1, COL1A1, FMOD, LTBP2, MFAP4, CDO1, SERPINF1, FBLN5, OGN, ITGBL1, COL14A1, COL1A2, ABI3BP, MYH11, GAS1, ADH1B, CRABP2, COL6A2, PTGFR, PCOLCE, COL3A1, C1S, AKR1C1, COL6A3, MGP, CFB, PLAGL1, BHMT2, GDF10, IGFBP6, CEBPB, ISLR, AOX1, DCN, F10, ADCY7, IGFBP3, PLN, C1R, OLFML3, DKK2, CTSK, PTGIS, TMED3, SLC22A3, C7, SERPINA3, NIBAN1, GSTM3, S100A4, PCOLCE2, MAN1C1, CFD, CD302, CRIP1, CFH, L…	C2	CGP	Genes up-regulated in freshly isolated CD31- [GeneID=5175] (stromal stem cells from adipose tissue) versus the CD31+ (non-stem) counterparts.
PASINI_SUZ12_TARGETS_DN	1.85531e-10	6.86069e-08	0.826657	-0.358432	-2.1073	290	PRNP, PEA15, COL1A1, CRLF1, CYP1B1, TAGLN, DSP, ACTA2, CD151, COL1A2, TPM2, APP, DDX6, TPM4, PHLDB2, FZD2, COL3A1, AMMECR1L, PKP2, CCN4, PPBP, IGFBP4, THBS1, ANXA1, LPP, VCL, CITED2, TUBB6, PDLIM7, TGFB1I1, MYO1C, JAG1, TMEM43, FN1, IGFBP3, CLIC1, MLLT11, DUSP14, LHFPL6, TES, BMP4, CNN2, CD24, RBMS1, KRT18, MTPN, VAT1, SOX4, MYC, BTG2, ANXA2, LRRFIP1, SULF1, DUSP1, LIMD2, PRSS23, TENM3, SKIL, JUN…	C2	CGP	Genes down-regulated in ES (embryonic stem cells) with defficient SUZ12 [GeneID=23512].
GOBP_CELL_CELL_ADHESION	2.31059e-10	8.42389e-08	0.826657	-0.26945	-1.74129	763	CCL28, CD47, PRNP, HLA-DQA1, HLA-DQB1, VSTM2L, PIK3CG, ARG2, PCDHGA12, MADCAM1, NDFIP1, CYP1B1, ADGRL1, DLG4, IGF2, NCK2, ITGA5, COL14A1, DSP, HLA-DRB5, SIGLEC1, EPCAM, FCGR2B, ASS1, MYL9, PCDHB11, FBLIM1, RIC8A, PCDHB4, PRKAR1A, PKP2, HLA-DRB1, CEBPB, CCL19, ANXA1, LPP, NTN1, CD6, VCL, TNFRSF21, FLOT2, CITED2, CD209, GCNT2, PLEK, PVR, CCN3, OBSCN, JAG1, C1QTNF1, FN1, MIA3, PCDHA13, CLIC1, IGFBP2…	C5	GO:BP	The attachment of one cell to another cell via adhesion molecules. [GOC:dos]
DURANTE_ADULT_OLFACTORY_NEUROEPITHELIUM_DENDRITIC_CELLS	2.62031e-10	9.32155e-08	0.814036	-0.496659	-2.4986	105	CEBPB, RNF149, PLEK, MS4A6A, IFI30, JAML, OAZ1, FGL2, HLA-DRA, FYB1, PHACTR1, S100A4, TNFAIP2, CFD, LST1, AIF1, LAPTM5, TNFRSF1B, NCF1, ACTB, DUSP1, LCP1, SPI1, CD68, PTPRC, POU2F2, STXBP2, MNDA, CSF3R, TYROBP, STX11, CCL3, SOD2, NFKBIZ, CD37, SAMSN1, CARD16, CORO1A, S100A12, PTPRE, CD48, CLEC7A, COTL1, IFITM2, FCER1G, EMP3, GMFG, LSP1, PTGS2, LYN, CD14, BCL2A1, FGR, PILRA, SERPINA1, NCF2, SRGN, …	C8
GOBP_INFLAMMATORY_RESPONSE	2.63949e-10	9.32155e-08	0.814036	-0.289169	-1.83134	584	CD47, GPS2, SCYL1, PIK3CG, TLR10, CDO1, SERPINF1, NDFIP1, HYAL3, SPHK1, SOCS3, CIITA, SIGLEC1, FCGR2B, LIAS, APP, ASS1, GGT5, CYP26B1, IL17RE, PTGFR, MFHAS1, CCN4, AOC3, PPBP, GPX1, HLA-DRB1, IGFBP4, CEBPB, CCL19, THBS1, ANXA1, GRN, VAMP8, OPRM1, B4GALT1, CD6, CD180, FCGR1A, ADCY7, CCN3, FN1, KPNA6, CNR1, KARS1, CERS6, CAMK1D, MAP2K3, SELE, PLD4, ATRN, IL10, PTGIS, MTOR, ECM1, IL1RL2, TUSC2, MAPK…	C5	GO:BP	The immediate defensive reaction (by vertebrate tissue) to infection or injury caused by chemical or physical agents. The process is characterized by local vasodilation, extravasation of plasma into intercellular spaces and accumulation of white blood cells and macrophages. [GO_REF:0000022, ISBN:0198506732]
LIM_MAMMARY_STEM_CELL_UP	2.66484e-10	9.32155e-08	0.814036	-0.326304	-2.00086	425	AHI1, PRNP, FMOD, CRLF1, SERPINF1, ACTG2, ADGRL1, TAGLN, COL14A1, ACTA2, CLIP3, SPHK1, GJC1, ABI3BP, MYH11, GPR87, TPM2, MYL9, ADAMTS2, OSR1, PCOLCE, CPXM1, COL18A1, PDLIM4, ADAMTS1, IGFBP6, SERPING1, IGFBP4, NRP1, THBS1, MEDAG, L3HYPDH, LAMC1, TUBB6, PDLIM7, TGFB1I1, TRIM9, OSBPL6, JAG1, ADARB1, AQP9, IGFBP3, SSH1, CACNB4, IGFBP2, NNMT, LHFPL6, PTPRT, TMEM121, TES, PDPN, FGL2, MRGPRF, CARD10, DK…	C2	CGP	Genes consistently up-regulated in mammary stem cells both in mouse and human species.
ICHIBA_GRAFT_VERSUS_HOST_DISEASE_35D_UP	3.22462e-10	1.11292e-07	0.814036	-0.479249	-2.4664	119	HLA-DQA1, SLPI, TSPAN4, LILRB5, LGMN, HLA-DRB1, GRN, FCGR1A, SHISA5, PROCR, CLIC1, NNMT, PLD4, FGL2, COLGALT1, SERPINA3, HCK, TLR6, BTG2, S100A4, TMSB10, CYP26A1, AIF1, LAPTM5, CCL5, CD68, S100A11, PTPRC, CD53, MNDA, SMOC2, TYROBP, CSF1R, NABP1, ADGRE1, NFKBIZ, HLA-E, CD74, APBB1IP, PKM, LCP2, CCR1, MCM4, CASP1, HLA-DMB, RRAS, GPX3, GBP2, CTPS1, SH3GL1, LPL, C1QA, C1QC, MARVELD1, ATP1B3, CTSC, CC…	C2	CGP	Hepatic graft versus host disease (GVHD), day 35: genes up-regulated in allogeneic vs syngeneic bone marrow transplant.
LEI_MYB_TARGETS	3.61634e-10	1.2317e-07	0.814036	-0.368181	-2.15634	281	PEA15, CYP1B1, ACTA2, IRF6, COL1A2, NXF1, EPCAM, CRABP2, MYL9, PPIB, AKR1C1, COL6A3, SERPING1, CEBPB, ANXA1, GRN, APEX1, LAMC2, SLC25A46, VCL, ISG20, TGFBI, STAT6, PPM1E, FN1, DAB2, PTTG1, NNMT, CTSK, CD24, BTG1, KRT18, SEMA3F, LASP1, LAMB1, UBC, MYC, TPX2, LTA4H, CLU, NINJ1, ANXA2, SLC2A3, PRSS23, NUPR1, ACTR2, TM7SF2, NDUFV1, TPM1, S100A10, ZNF217, SAA1, ADGRG6, LPCAT1, LUM, IL1RN, GFUS, LY6E, …	C2	CGP	Myb-regulated genes in MCF7 (breast cancer) and lung epithelial cell lines overexpressing MYBL2, MYBL1 or MYB [GeneID=4605;4603;4602].
MODULE_1	3.69113e-10	1.24084e-07	0.814036	-0.343992	-2.05798	339	ULK1, SLPI, COL1A1, FMOD, LTBP2, MFAP4, ACTG2, FGFR1, CD151, COL1A2, MYH11, GAS1, CHST15, TPM2, ALDH1A2, MYL9, COL6A2, PCOLCE, COL3A1, C1S, SVIL, AKR1C1, COL6A3, AOC3, IGFBP6, LGMN, IGFBP4, ANXA1, F13A1, AOX1, TGFBI, CITED2, PDLIM7, CAP2, FN1, IGFBP3, DAB2, IGFBP2, SELE, COL15A1, TES, CTSK, PDPN, CLEC3B, DEPP1, PTGIS, C7, LAMB1, SOX4, MYC, LMO4, COL4A1, CFD, VEGFA, CD302, CRIP1, CFH, NID2, MBNL1,…	C4	CM	Ovary genes.
MANNO_MIDBRAIN_NEUROTYPES_HENDO	3.89436e-10	1.29238e-07	0.814036	-0.261439	-1.70113	815	PLVAP, PARP12, SLC16A5, ZNF366, LHX6, LSR, ITGA5, ANKRD37, N4BP3, DSP, FAR2, SOCS3, CHST15, MATN3, KLF2, GLRX, GGT5, GALNT18, HOPX, TPM4, SVIL, KDR, FOXC1, GIPC3, FBLN2, TP53I11, ADAMTS1, CCDC68, QPCT, IGFBP4, NRP1, FGD5, ANXA1, GRN, ISLR, LPP, PFN1, B4GALT1, VCL, LAMC1, TUBB6, IQGAP2, STAT6, ANXA11, ELN, MYO1C, VIP, GADD45B, CYB5A, JAG1, FN1, IGFBP3, LEPR, PROCR, DAB2, CAVIN3, IGFBP2, SELE, PIK3…	C8		Cell types are named using anatomical and functional mnemonics prefixed by 'm' or'h' to indicate mouse and human respectively: OMTN, oculomotor and trochlear nucleus; Sert, serotonergic; NbM, medial neuroblast; NbDA, neuroblast dopaminergic; DA0-2, dopaminergic neurons; RN, red nucleus; Gaba1-2, GABAergic neurons; mNbL1-2, lateral neuroblasts; NbML1-5, mediolateral neuroblasts; NProg, neuronal pr…
DESCARTES_FETAL_CEREBRUM_VASCULAR_ENDOTHELIAL_CELLS	4.91092e-10	1.6091e-07	0.801216	-0.31886	-1.95248	420	SLC39A10, ZNF366, FRZB, LSR, IGF2, TAGLN, DSP, ACTA2, COL1A2, SOCS3, FOXC2, UBL4B, OLFML2A, KLF2, GGT5, SLC5A4, COL6A2, PHLDB2, TBX18, PCOLCE, COL3A1, KDR, FOXC1, COL18A1, ZNF593OS, TBX15, AOC3, QPCT, SERPING1, IGFBP4, FGD5, ANXA1, EIF3I, SLC6A13, MEDAG, DCN, LAMC1, SAMM50, TDRD1, HTRA3, JPH2, C1QTNF1, FN1, PROCR, CAVIN3, JAML, SELE, ATP8B1, CTSK, FAM43A, CLEC3B, DEPP1, CARD10, EFNA1, NIP7, AFAP1…	C8		descartes DE_gene_by_organ.csv, fold.change>5, qval<0.05, pval<0.05
FAN_EMBRYONIC_CTX_BRAIN_ENDOTHELIAL_2	5.84996e-10	1.87089e-07	0.801216	-0.352706	-2.07363	290	PHACTR2, FRZB, TAGLN, CD151, COL1A2, GJC1, OLFML2A, TPM2, GGT5, MYL9, GALNT18, TPM4, COL6A2, TBX18, PCOLCE, COL3A1, COL18A1, PLAGL1, FXYD6, SERPING1, VCL, TNFRSF21, DCN, LAMC1, PDLIM7, TGFB1I1, HTRA3, FN1, CAVIN3, LHFPL6, ECM1, LAMB1, FAM20A, NDUFA4L2, COL4A2, COL4A1, PCDH18, NR2F2, CRIP1, CFH, S1PR3, NID2, ANXA2, LAMA2, CYC1, GUCY1A1, C11orf96, FBLN1, ADAM33, RFTN1, APOD, PGF, FRMD6, FOXS1, MYO1…	C8
BUSSLINGER_ESOPHAGEAL_DENDRITIC_CELLS	5.85442e-10	1.87089e-07	0.801216	-0.402431	-2.24489	194	HLA-DQA1, PEA15, HLA-DQB1, SERPINF1, HLA-DRB5, PAK1, GLRX, GPX1, HLA-DRB1, PFN1, EHBP1L1, GNA15, ADCY7, SLC29A1, PLEK, MS4A6A, CAMK1D, IFI30, JAML, NR4A3, CNN2, FGL2, HLA-DRA, SLA, HCK, GNAI2, NIBAN1, S100A4, RGS10, LST1, TMSB10, AIF1, CRIP1, LAPTM5, ACTB, SLC2A3, CYRIB, LCP1, SPI1, ARPC1B, SKIL, ACTR2, HLA-B, PTPRC, TYROBP, CSF1R, RGS1, CD37, CD4, YWHAH, CD74, ADA2, BASP1, RASSF5, GDI2, ATP2B1, …	C8
GOBP_POSITIVE_REGULATION_OF_IMMUNE_SYSTEM_PROCESS	6.13594e-10	1.93694e-07	0.801216	-0.279498	-1.78853	659	PLVAP, CD47, GPS2, PRNP, HLA-DQA1, SLC39A10, HLA-DQB1, MADCAM1, EXOSC6, MFAP4, COCH, CREB1, IGF2, NCK2, EIF2B3, HLA-DRB5, PAK1, FCGR2B, APP, LYVE1, C1S, CFB, MCU, LGMN, HLA-DRB1, SERPING1, POLR3B, CCL19, THBS1, ANXA1, MR1, VAMP8, CD6, TNFRSF21, FLOT2, CD209, STAT6, PVR, CNR1, KARS1, MIA3, CAMK1D, C1R, IGFBP2, PIK3CB, IL10, HLA-DOB, NR4A3, UBE2N, CD24, DPP4, C2, HLA-DRA, AKIRIN2, VAV1, KCNN4, FYB1…	C5	GO:BP	Any process that activates or increases the frequency, rate, or extent of an immune system process. [GOC:add]
GOCC_VESICLE_LUMEN	7.35604e-10	2.29411e-07	0.801216	-0.364238	-2.13428	280	NAPRT, CAND1, SLPI, IGF2, APP, PCSK1, POMC, HSP90AB1, PSMD13, PPBP, CHIT1, QPCT, SERPING1, THBS1, GRN, ISLR, F13A1, IMPDH2, VCL, FN1, PSMD1, CTSA, GNS, CNN2, TUBB, CLEC3B, ECM1, GAS6, SERPINA3, VAT1, ALDOA, RETN, CFD, CLU, VEGFA, VCP, ANXA2, CYRIB, MMRN1, DOCK2, GRP, ACTR2, S100A11, PCYOX1L, BIN2, HRNR, PTPN6, MNDA, TUBB4B, RNASET2, UNC13D, NPC2, C3, OLFM4, ADA2, TIMP3, IMPDH1, PKM, ACTN1, GDI2, …	C5	GO:CC	The volume enclosed by the membrane or protein that forms a vesicle. [GOC:mah, GOC:vesicles]
WU_CELL_MIGRATION	8.29095e-10	2.55489e-07	0.801216	-0.428859	-2.33491	164	BICC1, SLPI, TSPAN4, CHST15, EPCAM, GPR87, TPM2, COL6A2, RAB25, TSPAN13, AKR1C1, COL18A1, PLAGL1, ADAMTS1, IGFBP6, THBS1, TGFBI, TNFRSF21, TUBB6, TMEM30B, SPINT1, JAG1, FN1, IGFBP3, NNMT, IGF2BP2, CD24, DKK3, KRT18, MAPK13, GSTM3, S100A4, TNFAIP2, COL4A2, COL4A1, CLU, ERAP2, NR2F2, SACS, NMU, FBLN1, MAP1B, PTGER4, CCN1, KLF5, GLIPR1, TIMP3, WWTR1, KRT19, PODXL, ARHGDIB, S100P, MT1H, WNT5A, CRYBG1…	C2	CGP	Genes associated with migration rate of 40 human bladder cancer cells.
TRAVAGLINI_LUNG_LIPOFIBROBLAST_CELL	9.59374e-10	2.92158e-07	0.788187	-0.455085	-2.40643	136	CTH, COL1A1, SERPINF1, CYP1B1, SOCS3, CYP26B1, GSPT1, OSR1, TBX18, CPXM1, COL3A1, C1S, PDLIM4, IGFBP4, CEBPB, B4GALT1, MEDAG, C1QTNF1, MLLT11, NNMT, NR4A3, PDPN, C7, MYC, NIP7, TUBA1C, UAP1, TMSB10, VEGFA, APOD, SLC19A2, PLAAT4, CXCL12, RSPO3, C3, RARRES1, CD74, IFITM1, MMP19, ATP13A3, RGS4, CDKN1A, ETF1, PGAP1, PNRC1, ZFP36L1, HK2, MRTO4, IL1R1, SLC20A1, RND3, SERPINE2, CCDC80, PSMG1, PIM1, TWIS…	C8
AIZARANI_LIVER_C29_MVECS_2	1.11089e-09	3.34365e-07	0.788187	-0.350361	-2.06793	298	PLVAP, PEA15, ITGA5, COL8A1, CD151, SOCS3, ABI3BP, KLF2, APP, TPM4, COL3A1, FOXC1, HSP90AB1, INMT, FBLN2, MGP, TP53I11, FXYD6, ADAMTS1, IGFBP4, FGD5, ANXA1, B4GALT1, B4GALT5, TUBB6, CDC42EP3, MYO1C, C1QTNF1, IGFBP3, SELE, BMP4, CLEC3B, PTGIS, DKK3, C7, GJA5, GNAI2, MYC, NIBAN2, TMSB10, NR2F2, ANXA2, PRSS23, MMRN1, C11orf96, NOS3, THBD, S100A10, TUBB4B, MMRN2, RSPO3, SKI, CCN1, HLA-E, TIMP3, FLOT1…	C8
ZAK_PBMC_MRKAD5_HIV_1_GAG_POL_NEF_AGE_20_50YO_1DY_UP	1.16296e-09	3.46015e-07	0.788187	-0.249508	-1.64016	928	NAPRT, BATF3, TAPBPL, PEA15, PARP12, TAGLN, ACTA2, FAR2, CD151, HLA-DRB5, SOCS3, PAK1, ABI3, SIGLEC1, ADPRS, CHST15, TPMT, FAM91A1, GLRX, MARCO, TMEM268, CTSB, CFB, KIAA0319L, FXYD6, HLA-DRB1, SERPING1, CEBPB, RNF149, RNF19B, MR1, GPR35, GRN, BID, EHBP1L1, ISG20, PIGS, PCMT1, B4GALT5, OTOF, SECTM1, PLXNC1, SHISA5, GNA15, FUOM, SLC29A1, PLEK, GADD45B, EPB41L3, MS4A6A, AQP9, MIA3, CLIC1, IFI30, HMG…	C7	VAX	Genes up-regulated in peripheral blood mononuclear cell 1d vs 0d in adults (20-50) after exposure to MRKAd5 HIV-1 gag/pol/nef , time point 1D. Comment: Table includes specific cell types
KIM_GLIS2_TARGETS_UP	1.22496e-09	3.60319e-07	0.788187	-0.546383	-2.60266	76	HLA-DQA1, COL1A1, LTBP2, MFAP4, OGN, COL14A1, COL1A2, SOCS3, ADAMTS2, COL3A1, COL18A1, MGP, LILRB5, HLA-DRB1, TGFBI, DCN, IGFBP2, COL15A1, HLA-DRA, S100A4, IGSF10, COL4A1, AIF1, CFH, CCL5, FCGR2A, LUM, CXCL12, CASP4, C3, CD74, CCN2, ADAM8, CX3CL1, HLA-DMB, POSTN, FCER1G, IRF1, LSP1, IFITM3, BCL2A1	C2	CGP	Partial list of genes up-regulated in the kidney of GLIS2 [GeneID=84662] knockout mice compared to the wild type.
GOBP_POSITIVE_REGULATION_OF_CELL_ADHESION	1.25582e-09	3.65245e-07	0.788187	-0.324228	-1.95965	373	CCL28, CD47, HLA-DQA1, HLA-DQB1, PLEKHA2, FLCN, IGF2, NCK2, ITGA5, COL8A1, HLA-DRB5, FOXC2, ABI3BP, KDR, FBLN2, HLA-DRB1, NRP1, CCL19, ANXA1, CD6, FLOT2, POLDIP2, CITED2, CD209, GCNT2, FN1, DAB2, IGFBP2, SELE, IL10, HLA-DOB, NR4A3, PDPN, ARPC2, CD24, DPP4, HLA-DRA, VAV1, IL1RL2, SOX4, RUNX1, EFNB3, IL27RA, IL12RB1, VEGFA, VNN1, AIF1, IL18, CYRIB, CCL5, F11R, MMRN1, RPS3, PPP3CA, RHOH, CD27, SYK, …	C5	GO:BP	Any process that activates or increases the frequency, rate or extent of cell adhesion. [GOC:go_curators]
DESCARTES_FETAL_EYE_STROMAL_CELLS	1.43083e-09	4.11523e-07	0.788187	-0.544319	-2.59282	76	COL1A1, FMOD, OGN, ITGBL1, COL14A1, COL1A2, ADAMTS2, COL6A2, PCOLCE, SCARA5, COL3A1, COL6A3, MGP, IGFBP6, THBS1, ISLR, MEDAG, DCN, FN1, C1R, KDELR3, DKK2, COL12A1, IGSF10, PCDH18, CTHRC1, LOX, ADAM33, LUM, CXCL12, PODN, TWIST2, MMP19, ADAMTSL4, EDNRA, POSTN	C8		descartes DE_gene_by_organ.csv, fold.change>5, qval<0.05, pval<0.05
GOBP_INNATE_IMMUNE_RESPONSE	1.55108e-09	4.41207e-07	0.788187	-0.289465	-1.83266	569	STYK1, PCBP2, CD47, SLPI, LILRA4, PIK3CG, ARG2, MFAP4, COCH, CLEC2A, PAK1, CIITA, FCGR2B, ASS1, MARCO, TRIM58, MFHAS1, C1S, HSP90AB1, CFB, SERPING1, POLR3B, CCL19, ANXA1, RNF19B, MR1, CNPY3, GRN, CD6, CD180, ISG20, FCGR1A, CD209, SERINC3, PVR, MYO1C, ADARB1, MRC1, C1R, ARRB2, PLD4, APOBEC3C, APOBEC3G, APOBEC3F, TUBB, POLR3A, RNF39, C2, AKIRIN2, VAV1, G3BP1, TTC4, SLA, C7, IL1RL2, DEFB1, HCK, RNF1…	C5	GO:BP	Innate immune responses are defense responses mediated by germline encoded components that directly recognize components of potential pathogens. [GO_REF:0000022, GOC:add, GOC:ebc, GOC:mtg_sensu]
NABA_ECM_GLYCOPROTEINS	1.77637e-09	4.99797e-07	0.788187	-0.437589	-2.35103	151	LTBP2, MFAP4, COCH, FBLN5, NELL2, ABI3BP, MATN3, SLIT1, THSD4, PCOLCE, FBLN2, MGP, NTN4, CCN4, IGFBP6, IGFBP4, THBS1, LAMC2, NTN1, TGFBI, LAMC1, VTN, CCN3, ELN, FN1, IGFBP3, IGFBP2, FGL2, VWDE, SNED1, ECM1, GAS6, LAMB1, PCOLCE2, IGSF10, NID2, LAMA2, CTHRC1, MMRN1, FBLN1, LAMC3, SMOC2, EGFLAM, MMRN2, RSPO3, CCN1, PXDN, MFAP3, VIT, LTBP1, CCN2, POMZP3, POSTN, RELN, SBSPON, TNXB, ZP3, EMILIN2, SLIT3…	C2	CP	Genes encoding structural ECM glycoproteins
CUI_DEVELOPING_HEART_SMOOTH_MUSCLE_CELL	1.8539e-09	5.16002e-07	0.788187	-0.659394	-2.75769	43	COL1A1, SERPINF1, COL14A1, COL1A2, CPZ, CRABP2, OSR1, PCOLCE, COL3A1, C1S, IGFBP4, F10, ELN, C1R, CTSK, S100A4, CFH, DUSP1, RCN3, LOX, FBLN1	C8
IGLESIAS_E2F_TARGETS_UP	2.05301e-09	5.65341e-07	0.774939	-0.448344	-2.37016	135	CD47, COL1A1, CDO1, SERPINF1, OGN, ACTA2, COL1A2, COL6A2, COL3A1, COL6A3, COL18A1, FBLN2, IGFBP4, DCN, ELN, DAB2, MRC1, CLIC1, CACYBP, COL15A1, TUBB, AKIRIN2, CKS1B, GAS6, GNAI2, COL4A1, CFD, CRIP1, LAPTM5, NID2, ANXA2, APLP2, LCP1, ACTG1, SKP1, S100A11, CD53, LYL1, S100A10, CES1, TYROBP, CDC6, LUM, CADM1, C3, CD74, SLC25A4, KRT19, POSTN, LIMS1, LPL, C1QA, C1QC, BAX, ACADL, C1QB, LGALS1, HBA2	C2	CGP	Genes up-regulated in pancreatic cells from mice with double knockout of E2F1 [GeneID=1869] and E2F2 [GeneID=1870] compared to wild type.
RUBENSTEIN_SKELETAL_MUSCLE_MYELOID_CELLS	2.20045e-09	5.99565e-07	0.774939	-0.332275	-1.97926	324	PCBP2, EIF4EBP1, GLRX, CTSB, CAPZB, GPX1, HLA-DRB1, CEBPB, VAMP8, PFN1, BID, EIF4A1, FCGR1A, RGS18, CITED2, PLEK, HCST, MS4A6A, IFI30, JAML, OAZ1, ARRB2, RPL23, ARPC2, FGL2, HLA-DRA, FYB1, RPL19, HCK, ALDOA, BTG2, LTA4H, SSR2, S100A4, RGS10, LST1, TMSB10, AIF1, CRIP1, LAPTM5, EIF3K, ACTB, M6PR, GPSM3, TBXAS1, LRRFIP1, DUSP1, CYRIB, LIMD2, LCP1, SPI1, ARPC1B, CD68, ACTR2, IER3, S100A11, PTPRC, IFN…	C8
LU_AGING_BRAIN_UP	2.35935e-09	6.32931e-07	0.774939	0.3978	2.10679	247	ELOVL2, STK3, NDRG1, FGFR2, TP53BP2, RAMP1, SEPTIN4, GAB2, SFRP1, EFHD1, ZCCHC24, TLN1, ZBTB20, TXNIP, WNK1, CRYAB, RAPGEF4, TST, CSRP1, TAX1BP3, IQGAP1, PHF3, ZNF423, DDR1, HSPA2, TASOR, PDLIM5, PAIP2B, SCP2, BBOX1, CAV1, QKI, GPRC5B, NFKBIA, PTP4A2, RHOBTB3, PDLIM3, PLXNB1, MLC1, NEK7, PMP22, SYPL1, ITPKB, CALD1, PHLPP1, AGT, YES1, PICALM, PRDX6, KANK1, FXYD1, ID4, RASSF2, SLC16A1, NT5C2, HP, B…	C2	CGP	Age up-regulated genes in the human frontal cortex.
MODULE_79	2.38629e-09	6.32931e-07	0.774939	-0.52142	-2.52357	85	GNLY, CYP1B1, CD151, DES, CTSB, GPX1, LGMN, THBS1, FCGR1A, NXPH3, FN1, DAB2, IFI30, IL32, GAS6, S100A4, C3AR1, AIF1, CEBPD, CCR5, GBP1, CCL5, IER3, FCGR2A, MMP2, TYROBP, CSF1R, CXCL12, CCN1, TIMP3, IFITM1, CCR1, GBP2, IL1R1, KCTD12, IFITM2, FCER1G, PDGFRB, IFITM3, CD14, HLA-DOA, HBA2	C4	CM	Genes in the cancer module 79.
GOBP_POSITIVE_REGULATION_OF_LOCOMOTION	2.4105e-09	6.32931e-07	0.774939	-0.302391	-1.88086	480	PLVAP, ZNF304, CD47, COL1A1, PIK3CG, MADCAM1, CYP1B1, FGFR1, ITGA5, ACTA2, CD151, SPHK1, PAK1, FOXC2, CEMIP, APP, PDCD6, ROCK2, RAB25, LYVE1, KDR, MCU, ADAMTS1, CCN4, LGMN, NRP1, CCL19, THBS1, ANXA1, GRN, LAMC2, PFN1, NTN1, F10, VTN, GCNT2, MYO1C, FN1, MIA3, DAB2, CAMK1D, MAP2K3, PIK3CB, OPRK1, FBXO5, NR4A3, PLAU, BMP4, PDPN, MTOR, SEMA3F, DEFB1, GAS6, SEMA6C, LAMB1, GNAI2, MYC, ELP3, C3AR1, VEGF…	C5	GO:BP	Any process that activates or increases the frequency, rate or extent of locomotion of a cell or organism. [GOC:go_curators]
GSE29618_PDC_VS_MDC_DN	2.42071e-09	6.32931e-07	0.774939	-0.404136	-2.22968	182	HLA-DQB1, PAK1, CIITA, ANXA1, PLXNC1, IFI30, CNN2, FGL2, APOBR, HLA-DRA, HCK, S100A4, TNFAIP2, VDAC1, RGS10, LST1, TMSB10, VEGFA, AIF1, CEBPD, PPA1, ANXA2, SLC2A3, LIMD2, GBP1, SPI1, DIAPH1, PTPRC, ITGAM, S100A10, FCGR2A, PTGER4, MNDA, PLAAT4, STX11, CUL1, IL1RN, LGALS9, BLVRB, LAT2, AOAH, YWHAH, BASP1, PKM, ATP2B1, PPT1, CASP1, ADAM8, PID1, ARHGDIB, ZFP36L1, HK2, RAD23B, CLEC7A, GBP2, COTL1, IFI…	C7	IMMUNESIGDB	Genes down-regulated in comparison of plasmacytoid dendritic cells (DC) versus myeloid DCs.
GSE22886_NAIVE_CD8_TCELL_VS_MONOCYTE_DN	2.59645e-09	6.72091e-07	0.774939	-0.400444	-2.22479	190	CHST15, ARID3A, APP, CTSB, PLAGL1, GPX1, QPCT, GRN, BID, TGFBI, PLXNC1, CDC42EP3, PGD, MS4A6A, IFI30, OAZ1, GNS, FGL2, LTBR, HCK, TNFAIP2, CEBPD, LAPTM5, TNFRSF1B, ANXA2, APLP2, S100A11, NADK, MFSD1, SYK, KCNMB1, IFNGR2, FCGR2A, ATP6V1A, MNDA, DMXL2, CSF3R, TYROBP, NAGK, CSF1R, ADPGK, PLCG2, LAT2, NPC2, SNCA, ADAP2, CCR1, S100A12, PPM1H, HEXB, PRKCD, PTPRE, HMOX1, SDCBP, IRF8, CSF2RB, CLEC7A, BCL…	C7	IMMUNESIGDB	Genes down-regulated in comparison of naive CD8 T cells versus day 0 monocytes.
SWEET_LUNG_CANCER_KRAS_UP	3.12721e-09	8.01464e-07	0.774939	-0.315076	-1.9269	417	PRNP, HLA-DQA1, SLPI, PSMD4, CRLF1, ARG2, POLR1C, EPCAM, FCGR2B, GLRX, MARCO, TMEM268, TPM4, CTSB, COL18A1, HM13, HLA-DRB1, THBS1, RNF149, VAMP8, APEX1, LAMC2, MYH7, TGFBI, F10, CITED2, ADCY7, TMEM30B, SPINT1, IGFBP3, TFCP2L1, CTSA, MRC1, CLIC1, IFI30, SND1, GNS, COL15A1, GJB2, TES, CTSK, BMP4, HLA-DRA, NUDT4, BTG1, KRT18, CES3, ALDOA, GARS1, CLU, MARCHF5, LAPTM5, IL18, MAN1A1, LRRFIP1, CCR5, SCA…	C2	CGP	Genes up-regulated in the Kras2LA mouse lung cancer model with mutated KRAS [GeneID=3845].
FAN_OVARY_CL4_T_LYMPHOCYTE_NK_CELL_1	3.40891e-09	8.65094e-07	0.774939	-0.369791	-2.10648	227	RPS26, HLA-DQB1, GNLY, JPT1, PSMA7, GSPT1, HOPX, HLA-DRB1, ARL6IP5, ANXA1, PFN1, AKAP13, ISG20, YWHAB, ANXA11, NAA50, HCST, CLIC1, OAZ1, IL32, APOBEC3G, ARPC2, SRSF7, BTG1, EIF5A, UBC, OASL, S100A4, CST7, CRIP1, LAPTM5, TNFRSF1B, YWHAZ, LRRFIP1, DDX24, LIMD2, CCL5, LCP1, ARPC1B, S100A11, HLA-B, PTPRC, CCL4, SOD1, CD53, ARHGDIA, FGFR1OP2, S100A10, KLF6, PLAAT4, TUBB4B, HLA-A, SLC3A2, CD37, HLA-E, …	C8		The ovaries analyzed showed a pronounced population of CD53high/CXCR4high immune cells (Fig. 2e), including separate clusters for adaptive T lymphocytes and Natural Killer (NK) cells (CL4 and CL12), B lymphocytes (CL18), and innate immune system, such as monocytes and macrophages (CL13)
GOCC_EXTERNAL_ENCAPSULATING_STRUCTURE	3.84704e-09	9.66802e-07	0.761461	-0.30558	-1.87748	440	SLPI, COL1A1, FMOD, HAPLN4, LTBP2, MFAP4, COCH, SERPINF1, FBLN5, OGN, COL14A1, COL8A1, CD151, COL1A2, ABI3BP, OLFML2A, MATN3, WNT3, THSD4, ADAMTS2, COL6A2, PCOLCE, ITIH2, CTSB, COL3A1, ADAMTS15, COL6A3, COL18A1, FBLN2, MGP, NTN4, ADAMTS1, CCN4, GDF10, SERPING1, THBS1, ANXA1, F13A1, LAMC2, NTN1, CD180, TGFBI, DCN, LAMC1, VTN, TGFB1I1, CCN3, ANXA11, ELN, WNT6, FN1, GLG1, COL15A1, ATRN, FGL2, CLEC3B…	C5	GO:CC	A structure that lies outside the plasma membrane and surrounds the entire cell or cells. This does not include the periplasmic space. [GOC:go_curators]
MODULE_170	3.89021e-09	9.6825e-07	0.761461	-0.523842	-2.54474	86	GNLY, CYP1B1, CD151, DES, CTSB, GPX1, LGMN, THBS1, FCGR1A, NXPH3, FN1, DAB2, IFI30, IL32, GAS6, S100A4, C3AR1, AIF1, CEBPD, CCR5, GBP1, CCL5, IER3, FCGR2A, MMP2, TYROBP, CSF1R, CXCL12, CCN1, LPAR6, TIMP3, IFITM1, CCR1, GBP2, IL1R1, KCTD12, IFITM2, FCER1G, PDGFRB, IFITM3, CD14, HLA-DOA, HBA2	C4	CM	Immune response.
MODULE_122	4.13505e-09	1.01939e-06	0.761461	-0.458608	-2.3801	124	COL1A1, APBA1, LSAMP, ITGBL1, ITGA5, CD151, COL6A2, COL3A1, COL6A3, COL18A1, MGP, AOC3, PPBP, NRP1, ISLR, LAMC2, CD6, VCL, TGFBI, PTK7, VTN, ELN, FN1, COL12A1, LAMB1, COL4A1, IL18, LAMA2, MMRN1, CCL4, ITGAM, CSF3R, MCAM, ITGAL, CXCL12, MSLN, CDH6, ADGRE1, CCR1, ITGA3, PRELP, CCN2, ARHGDIB, CX3CL1, POSTN, RELN, DSG2, RND3, TNXB, ADAM12, PECAM1, LAMB3, COL11A1, LAMA5, AEBP1, LAMA4, ITGAX	C4	CM	Adhesion molecules.
DESCARTES_FETAL_STOMACH_MYELOID_CELLS	4.37205e-09	1.06082e-06	0.761461	-0.576457	-2.65829	66	HLA-DQA1, HLA-DQB1, HLA-DRB5, CIITA, HLA-DRB1, PLEK, MS4A6A, IFI30, JAML, PLD4, NR4A3, HLA-DRA, CD300A, HCK, TNFRSF1B, MYO1F, TBXAS1, CD163L1, SPI1, FGD2, CSF3R, TYROBP, CD84, CD4, CD74, FLT3, ADAP2, IRF8, HLA-DMB, CLEC7A, PIK3AP1, CD86, FCER1G, ALOX5, C1QA, C1QC, RUBCNL, CD14, C1QB, PTAFR, WDFY4, NCF2, CD83, ITGAX, LY86, MPEG1, NFAM1	C8		descartes DE_gene_by_organ.csv, fold.change>5, qval<0.05, pval<0.05
ONDER_CDH1_TARGETS_2_UP	4.39893e-09	1.06082e-06	0.761461	-0.366399	-2.08608	231	BICC1, COL1A1, LTBP2, SERPINF1, FBLN5, CYP1B1, PRUNE2, ITGBL1, TAGLN, FGFR1, COL8A1, ACTA2, COL1A2, SCG5, MLPH, GLRX, MYL9, COL6A2, FZD2, PTGFR, PCOLCE, COL3A1, COL6A3, IGFBP4, NRP1, AOX1, DCN, CITED2, RGS17, GADD45B, FN1, IGFBP3, LEPR, DAB2, NNMT, OLFML3, KDELR3, CLEC3B, SNED1, PCOLCE2, BLMH, NID2, DUSP1, NUPR1, LOX, FBLN1, GYPC, NLRP1, MAP1B, TPM1, PTGER4, MMP2, SLC7A2, TRAM2, SV2A, GSTA4, CHN1…	C2	CGP	Genes up-regulated in HMLE cells (immortalized nontransformed mammary epithelium) after E-cadhedrin (CDH1) [GeneID=999] knockdown by RNAi.
DESCARTES_FETAL_INTESTINE_MYELOID_CELLS	4.42606e-09	1.06082e-06	0.761461	-0.410425	-2.24051	167	HLA-DQA1, HLA-DQB1, TLR10, HLA-DRB5, CIITA, SIGLEC1, LILRB5, LGMN, HLA-DRB1, F13A1, BID, CD180, FCGR1A, RGS18, SECTM1, CD209, PLEK, MS4A6A, CACNB4, IFI30, PLD4, IL10, FGL2, CD300LF, HLA-DRA, SIRPB2, HCK, TLR6, RETN, CD300C, C3AR1, AIF1, NCF1, RASGRP4, TBXAS1, MEFV, CD163L1, SPI1, FGD2, STAB1, FCGR2A, DAPP1, FOLR2, MNDA, CSF3R, TYROBP, STX11, CSF1R, VMO1, RNASET2, CD200R1, ADGRE1, AOAH, CD4, CD74,…	C8		descartes DE_gene_by_organ.csv, fold.change>5, qval<0.05, pval<0.05
ZHU_CMV_24_HR_DN	4.78202e-09	1.13562e-06	0.761461	-0.534085	-2.54407	76	COL1A1, CYP1B1, IGF2, TAGLN, ACTA2, CD151, COL1A2, PAFAH1B1, GAS1, TPM2, TPM4, COL6A2, COL3A1, AKR1C1, GPX1, THBS1, ANXA1, MATK, IGFBP3, C1R, CNN2, PTGIS, RUNX1, CFD, SGCG, TNFRSF1A, LOX, ACTG1, TRAM2, CXCL12, WEE1, CHN1, TIMP3	C2	CGP	Down-regulated at 24 h following infection of primary human foreskin fibroblasts with CMV
MODULE_128	5.19987e-09	1.22363e-06	0.761461	-0.52369	-2.5317	84	GNLY, CYP1B1, CD151, DES, CTSB, GPX1, LGMN, THBS1, FCGR1A, NXPH3, FN1, DAB2, IFI30, IL32, GAS6, S100A4, C3AR1, AIF1, CEBPD, CCR5, GBP1, CCL5, IER3, FCGR2A, MMP2, TYROBP, CSF1R, CXCL12, CCN1, TIMP3, IFITM1, CCR1, GBP2, IL1R1, KCTD12, IFITM2, FCER1G, PDGFRB, IFITM3, CD14, HLA-DOA, HBA2	C4	CM	Genes in the cancer module 128.
DANG_REGULATED_BY_MYC_DN	5.49347e-09	1.28107e-06	0.761461	-0.367898	-2.0945	228	CD47, PEA15, COL1A1, FBLN5, IMPACT, CD151, COL1A2, GAS1, VHL, APP, CTSB, COL3A1, COL6A3, MGP, CFB, UBE2V1, THBS1, LAMC1, PDLIM7, SUCLA2, SERINC3, MYO1C, JPH2, FN1, CAVIN3, ELAVL4, NIBAN1, MYC, CPD, TCN2, SCPEP1, VEGFA, SCAMP1, DUSP1, LOX, IER3, ARHGAP25, TPM1, MYO1B, FAS, ITGAL, ACP5, LXN, NPC2, SNCA, MAPK3, MYL12A, CHP1, PPP1R15A, FSTL1, CDKN1A, IGF2R, CASP1, SLC2A5, HMOX1, SDCBP, CCN2, PDGFB, C…	C2	CGP	Genes down-regulated by MYC [GeneID=4609], according to the MYC Target Gene Database.
DESCARTES_FETAL_PANCREAS_MYELOID_CELLS	6.06495e-09	1.40171e-06	0.761461	-0.415535	-2.26573	165	BATF3, HLA-DQA1, HLA-DQB1, LILRA4, HLA-DRB5, SIGLEC1, ADAM28, LILRB5, LGMN, HLA-DRB1, GPR35, F13A1, FCGR1A, RGS18, GNA15, CD209, PLEK, MS4A6A, AQP9, IFI30, JAML, PLD4, IL10, FGL2, CD300LF, SIRPB2, HCK, RETN, CD300C, C3AR1, LST1, MYO1F, NCF1, RASGRP4, TBXAS1, CCR5, MEFV, CD163L1, PRAM1, SPI1, FGD2, CD68, ITGAM, FCGR2A, LRRC25, FOLR2, CEACAM4, MNDA, CSF3R, TYROBP, CSF1R, IL1RN, FLT3, CCR1, S100A12,…	C8		descartes DE_gene_by_organ.csv, fold.change>5, qval<0.05, pval<0.05
ALTEMEIER_RESPONSE_TO_LPS_WITH_MECHANICAL_VENTILATION	6.84909e-09	1.56893e-06	0.761461	-0.47078	-2.36841	105	ARG2, SOCS3, LILRB5, THBS1, F13A1, FCGR1A, PLEK, MS4A6A, FGL2, SLA, TNFAIP2, LST1, CEBPD, GDA, GEM, MEFV, TRIM5, ITGAM, TGM1, FCGR2A, CSF3R, CCL3, IL1RN, CCRL2, SOD2, CASP4, NFKBIZ, LCP2, IL4I1, CCR1, CSF2RB, GBP2, BCL3, CTPS1, FCER1G, MAP3K8, GCH1, SLC15A3, CCL4L2, CD14, EBI3, BCL2A1, RAB20, JUNB, NFIL3, SERPINE1, GPR65, STAT1, ST3GAL1, USP18, PLA2G7, IRF7, AKAP12, CXCL2, IL6, GPR84, CH25H, SLC2…	C2	CGP	Genes up-regulated in lung tissue upon LPS aspiration with mechanical ventilation (MV) compared to control (PBS aspiration without MV).
DESCARTES_FETAL_CEREBELLUM_VASCULAR_ENDOTHELIAL_CELLS	7.3582e-09	1.67076e-06	0.761461	-0.296292	-1.84122	484	SLC39A10, ZNF366, LHX6, LSR, IGF2, TAGLN, DSP, ACTA2, SLC16A12, FOXC2, FKBP9, OLFML2A, RAB11FIP5, MATN3, KLF2, GGT5, MYL9, HOPX, COL6A2, PHLDB2, TBX18, PCOLCE, COL3A1, KDR, FOXC1, GIPC3, COL18A1, QPCT, IGFBP4, FGD5, ANXA1, SLC6A13, MEDAG, LAMC1, SAMM50, TDRD1, IQGAP2, TGFB1I1, HTRA3, MYO1C, VIP, JPH2, C1QTNF1, FN1, PROCR, CAVIN3, JAML, SELE, IL32, ATP8B1, CTSK, FAM43A, CNN2, CLEC3B, DEPP1, CARD10…	C8		descartes DE_gene_by_organ.csv, fold.change>5, qval<0.05, pval<0.05
FAN_OVARY_CL16_LYMPHATIC_ENDOTHELIAL_CELL	7.50418e-09	1.68909e-06	0.74774	-0.37047	-2.09948	217	SLC38A1, CD151, ABI3BP, TSPAN4, APP, FXYD6, SERPING1, IGFBP4, GRN, PFN1, GADD45B, FN1, PROCR, NNMT, UGP2, PDPN, DEPP1, EFNA1, CLU, NR2F2, CEBPD, LAPTM5, ANXA2, MAN1A1, DUSP1, CTHRC1, PRSS23, APLP2, MMRN1, ARPC1B, LOX, GYPC, ACTR2, JUN, APOD, HLA-B, MAP1B, S100A10, KLF6, LRPAP1, MMP2, MYL12B, HLA-A, GFUS, TSPAN5, NPC2, CCN1, HLA-E, YWHAH, SDF4, TIMP3, LMAN2, MYL12A, PTMS, CALM1, HEXB, PTPRE, NRP2,…	C8		We identified three separate clusters (CL) of endothelial cells (CL7, CL9, CL16) expressing markers associated with lymph and blood vascular system (such as PECAM1, CD34, CTGF), but also associated with remodeling and inflammatory response (such as TXNIP, ANGPT2) (Fig. 3a-d). The DEGs of CL7 (such as CCL14, SOCS3, EGFL7) and CL16 (such as CCL21, TFF3) are linked to angiogenesis and lymphatics, re…
FAN_EMBRYONIC_CTX_BIG_GROUPS_BRAIN_ENDOTHELIAL	7.83335e-09	1.74799e-06	0.74774	-0.321879	-1.92969	350	SLC39A10, PHACTR2, ZNF366, FRZB, ITGA5, COL1A2, FKBP9, TPM2, GGT5, MYL9, GALNT18, HOPX, TPM4, COL6A2, PCOLCE, COL3A1, KDR, FOXC1, COL18A1, QPCT, SERPING1, IGFBP4, ANXA1, VCL, DCN, LAMC1, SAMM50, TUBB6, TGFB1I1, MYO1C, CYB5A, JAG1, FN1, PROCR, CLIC1, CAVIN3, LHFPL6, IL32, TES, CNN2, CLEC3B, EFNA1, ECM1, TMEM109, LTBR, LAMB1, CPD, TCN2, NDUFA4L2, COL4A2, COL4A1, PCDH18, NR2F2, CRIP1, S1PR3, NID2, L…	C8
FOROUTAN_INTEGRATED_TGFB_EMT_UP	8.21159e-09	1.81673e-06	0.74774	-0.475045	-2.40636	109	COL1A1, CRLF1, TAGLN, ITGA5, SPHK1, SCG5, MYL9, COL3A1, COL6A3, THBS1, TGFBI, PDLIM7, TGFB1I1, GADD45B, FN1, COL4A2, COL4A1, SLC26A2, SACS, LOX, SKIL, ZNF365, JUN, TPM1, MMP2, LUM, GLIPR1, FOXD1, RGS4, SMAD7, HMOX1, PODXL, CCN2, MRC2, PID1, POSTN, WNT5A, CDH11, MAF, SERPINE2, ITGB3, TGM2, SLN, ALOX5AP, JUNB, NCF2, INHBA, SNAI2, TGFB1, IGFBP5, SERPINE1	C2	CGP	Genes up-regulated in the epithelial-mesenchymal transition (EMT) upon transforming growth factor beta (TGFb) stimulation derived from multiple datasets by integrating them.
HALLMARK_MTORC1_SIGNALING	1.02729e-08	2.2535e-06	0.74774	-0.380371	-2.11746	192	CTH, ATP6V1D, GOT1, GLRX, ELOVL6, PSMD13, LGMN, MAP2K3, IFI30, MLLT11, HMGCS1, CACYBP, TES, FGL2, SLA, ALDOA, NIBAN1, BTG2, LTA4H, CCT6A, PPA1, M6PR, SLC2A3, NUPR1, TOMM40, ACTR2, ATP2A2, TM7SF2, ERO1A, DAPP1, PGM1, YKT6, PPP1R15A, CORO1A, CDKN1A, MCM4, ETF1, TMEM97, XBP1, PDK1, PSME3, SHMT2, HK2, GBE1, HMGCR, RPN1, DHCR7, TPI1, PSMC4, ME1, ACTR3, LDHA, CALR, PSMD12, TBK1, UBE2D3, HSPA5, PDAP1, C…	H		Genes up-regulated through activation of mTORC1 complex.
GOBP_REGULATION_OF_CELL_ACTIVATION	1.07375e-08	2.33563e-06	0.74774	-0.291388	-1.81225	487	CD47, PRNP, HLA-DQA1, SLC39A10, HLA-DQB1, ARG2, EXOSC6, NDFIP1, IGF2, NCK2, TNFSF8, ACTA2, SPHK1, HLA-DRB5, FCGR2B, CYP26B1, MFHAS1, PRKAR1A, HLA-DRB1, CEBPB, CCL19, THBS1, ANXA1, GRN, VAMP8, CD6, TNFRSF21, FLOT2, CD209, STAT6, PLEK, C1QTNF1, FN1, CNR1, KARS1, IGFBP2, IL10, HLA-DOB, NR4A3, BMP4, PDPN, FGL2, CD300LF, CD24, DPP4, HLA-DRA, VAV1, IL1RL2, GAS6, CD300A, SOX4, TLR6, LMO4, RUNX1, EFNB3, …	C5	GO:BP	Any process that modulates the frequency, rate or extent of cell activation, the change in the morphology or behavior of a cell resulting from exposure to an activating factor such as a cellular or soluble ligand. [GOC:ai]
MODULE_3	1.14247e-08	2.4644e-06	0.74774	-0.321089	-1.92484	353	PSMD4, LTBP2, EIF4EBP1, FGFR1, ITGA5, CD151, UBE4A, BYSL, TPM2, GSPT1, CDV3, CDK1, PDLIM4, IGFBP4, THBS1, ANXA1, GRN, EIF3I, APEX1, RCN1, CITED2, ATIC, TOMM34, PDLIM7, SLC29A1, EPB41L3, FN1, PROCR, DAB2, MLLT11, IGFBP2, PTTG1, DUSP14, NNMT, BMP4, PLK3, TMED3, KRT18, SEMA6C, VAT1, LAMB1, SOX4, TPX2, UAP1, CCT6A, COL4A1, LAPTM5, ANXA2, MBNL1, SEC13, PRSS23, TOMM40, LOX, ACTR2, HSPG2, IER3, S100A11,…	C4	CM	Genes in the cancer module 3.
REACTOME_RESPONSE_TO_ELEVATED_PLATELET_CYTOSOLIC_CA2	1.16257e-08	2.48704e-06	0.74774	-0.468919	-2.36422	107	HABP4, PHACTR2, IGF2, APP, RAB27B, PPBP, SERPING1, THBS1, ISLR, F13A1, PFN1, VCL, PLEK, FN1, CLEC3B, ECM1, GAS6, SERPINA3, ALDOA, CFD, ABCC4, CLU, VEGFA, CYRIB, APLP2, MMRN1, PCYOX1L, SOD1, STXBP2, TIMP3, ACTN1, FERMT3, CALM1, OLA1, PDGFB, ITGB3, HSPA5, RARRES2, LHFPL2, PECAM1, SERPINA1, MANF, SRGN, PROS1, TGFB1, TEX264, LGALS3BP, SERPINE1, CDC37L1, KNG1, CAP1, PCDH7	C2	CP:REACTOME	Response to elevated platelet cytosolic Ca2+
SWEET_LUNG_CANCER_KRAS_DN	1.33688e-08	2.8351e-06	0.74774	-0.312744	-1.88928	369	CD47, TM2D3, COL1A1, CDO1, OGN, TAGLN, ACTA2, COL1A2, MYH11, FKBP9, ADH1B, KLF2, MYL9, HOPX, COL6A2, TSPAN13, STMN3, MFHAS1, COL3A1, LYVE1, KDR, INMT, TMEM71, MGP, IGFBP6, SERPING1, SESN1, NTN1, VCL, DCN, RCN1, CYP2E1, GADD45B, ADARB1, MS4A6A, LEPR, TPH1, CAVIN3, IGFBP2, FGL2, NPR3, CLEC3B, PTGIS, SERPINA3, HCK, LAMB1, PCDHA9, IL27RA, CFD, VEGFA, NR2F2, CRIP1, CFH, LAMA2, DUSP1, LOX, ATP2A2, JUN,…	C2	CGP	Genes down-regulated in the Kras2LA mouse lung cancer model with mutated KRAS [GeneID=3845].
TRAVAGLINI_LUNG_MUCOUS_CELL	1.34718e-08	2.8351e-06	0.74774	-0.486898	-2.3937	92	HLA-DQA1, RPS26, SLPI, SERPINF1, ADAM28, ASS1, CTSB, KDR, AKR1C1, CFB, BID, IGFBP3, CSF3, SERPINA3, CPD, TNFAIP2, CLU, SLC26A2, MUCL1, ERO1A, MED24, SAA1, VMO1, KLK10, SOD2, LY6E, C3, RARRES1, IFITM1, SAA2, PLK2, XBP1, CX3CL1, S100P, CDC42EP5, GPX3, CSTB, AKR1C2, TGM2, HILPDA, MDK, CTSC, LYN, ANPEP, KYNU, LIF, IRAK3, DUSP5	C8
GOMF_GLYCOSAMINOGLYCAN_BINDING	1.50695e-08	3.127e-06	0.733762	-0.393175	-2.16638	181	PRNP, HAPLN4, LTBP2, H1-1, NELL2, FGFR1, PAFAH1B1, CEMIP, SLIT1, APP, PCOLCE, ITIH2, LYVE1, ADAMTS15, ADAMTS1, CCN4, NRP1, THBS1, LAMC2, DCN, VTN, CCN3, FN1, GNS, BMP4, CLEC3B, LPA, PCOLCE2, VEGFA, CFH, SULF1, SERPIND1, APLP2, HK1, STAB1, PGF, PTPRC, LRPAP1, SMOC2, COL13A1, SAA1, EGFLAM, LXN, RSPO3, GREM2, CCN1, SGSH, ADA2, VIT, FSTL1, HAPLN3, IMPG1, PRELP, CCN2, NRP2, POSTN, CHODL, SERPINA5, LPL…	C5	GO:MF	Binding to a glycan (polysaccharide) containing a substantial proportion of aminomonosaccharide residues. [GOC:jl, ISBN:0198506732]
MARKEY_RB1_CHRONIC_LOF_DN	1.51005e-08	3.127e-06	0.733762	-0.461412	-2.33326	108	TRPV2, ACTG2, CCN4, HM13, RNF149, RNF19B, DCN, MS4A6A, IGFBP3, TPH1, IFI30, MLLT11, IGFBP2, NPR3, VAV1, KRT18, COLGALT1, CD300C, NINJ1, C3AR1, CFH, SPI1, NUPR1, STAB1, PTPRC, CD53, UCHL1, TYROBP, CCL3, CSF1R, LGALS9, CADM1, TIMP3, LCP2, FERMT3, HMOX1, ADAM8, TFPI, C1QA, C1QC, GABARAPL1, RB1, CD14, C1QB, LILRB4, SRGN, IRF5, TEC, KDM5B, CD59, PARM1, GABRB1, PLA2G7, MSRB1, NGF, PLD3, MSR1, IL6, FBXO…	C2	CGP	Genes down-regulated in MEF cells (embryonic fibroblasts) isolated from RB1 [GeneID=5925] knockout mice: chronic loss of function (LOF) of RB1.
TRAVAGLINI_LUNG_LYMPHATIC_CELL	1.57859e-08	3.243e-06	0.733762	-0.389991	-2.15838	186	CD47, BATF3, LRRN4CL, MFAP4, SLC38A1, DSP, SPHK1, CHST15, RAB11FIP5, GGT5, COL6A2, PHLDB2, LYVE1, PDLIM4, TXN, NTN1, MEDAG, TGFBI, LAMC1, ELN, FN1, MRC1, NNMT, PDPN, DKK3, KRT18, FAM174B, CLU, RAB3IL1, NR2F2, CFH, LAPTM5, ANXA2, MMRN1, LOX, GYPC, APOD, MAP1B, FRMD6, S100A10, MMP2, TNFAIP8L3, RAB11FIP1, TSPAN5, GSTA4, AIG1, ACTN1, ABHD2, PTPRE, NRP2, IRF8, RELN, LIMS1, FHL3, MAF, CCDC80, GNAS, RAR…	C8
NADLER_OBESITY_UP	1.63067e-08	3.32362e-06	0.733762	-0.571611	-2.52956	55	PEA15, COL1A1, CTSV, SERPINF1, TPM4, CTSB, FBLN2, LGMN, GRN, PFN1, CTSA, MRC1, IFI30, CTSK, LAPTM5, SEC13, DUSP1, CD68, CD53, FCGR2A, CSF1R, BASP1, TPD52, POSTN, HCLS1, CSTB, FCER1G, ALOX5AP, C1QB, CTSD, IFI27, UCP2	C2	CGP	Genes up-regulated in adipose tissue from obese mouse strains compared to the lean ones.
GOBP_CIRCULATORY_SYSTEM_DEVELOPMENT	1.71655e-08	3.47133e-06	0.733762	-0.238935	-1.571	927	PAX8, AHI1, ZNF304, BICC1, IFT140, CTH, COL1A1, MTERF4, PIK3CG, SERPINF1, CYP1B1, CNMD, CREB1, TMEM65, ITGA5, DSP, COL8A1, ODAD4, ACTA2, SPHK1, COL1A2, GJC1, SOCS3, FOXC2, MYH11, KLF2, ALDH1A2, HOPX, PDCD6, OSR1, ROCK2, FZD2, RIC8A, TBX18, COL3A1, KDR, FOXC1, COL18A1, PRKAR1A, B9D1, PPP3CB, SORBS2, CDK1, PKP2, PDLIM4, ADAMTS1, GPX1, NRP1, THBS1, ANXA1, GRN, NPHP3, B4GALT1, MYH7, AKAP13, ATP2B4, E…	C5	GO:BP	The process whose specific outcome is the progression of the circulatory system over time, from its formation to the mature structure. The circulatory system is the organ system that passes nutrients (such as amino acids and electrolytes), gases, hormones, blood cells, etc. to and from cells in the body to help fight diseases and help stabilize body temperature and pH to maintain homeostasis. [GO…
GOBP_CELL_ACTIVATION	1.74403e-08	3.49955e-06	0.733762	-0.252325	-1.6421	820	CD47, BATF3, GPS2, PRNP, HLA-DQA1, SLC39A10, HLA-DQB1, PIK3CG, ARG2, EXOSC6, NDFIP1, IGF2, NCK2, TNFSF8, ACTA2, CD151, SPHK1, HLA-DRB5, FCGR2B, APP, DCAF1, MYL9, CYP26B1, MFHAS1, COL3A1, PRKAR1A, PPP3CB, HLA-DRB1, CEBPB, CCL19, THBS1, ANXA1, MR1, GRN, VAMP8, IMPDH2, CD6, CD180, VCL, TNFRSF21, FLOT2, CD209, STAT6, PLEK, C1QTNF1, FN1, CNR1, LEPR, KARS1, CLIC1, IGFBP2, JAML, PIK3CB, IL10, HLA-DOB, N…	C5	GO:BP	A change in the morphology or behavior of a cell resulting from exposure to an activating factor such as a cellular or soluble ligand. [GOC:mgi_curators]
CUI_DEVELOPING_HEART_VASCULAR_ENDOTHELIAL_CELL	1.78638e-08	3.55695e-06	0.733762	-0.391791	-2.15876	181	COL1A1, LTBP2, FBLN5, LSR, CD151, ABI3BP, ADH1B, KLF2, ASS1, FBLIM1, FBLN2, MGP, ADAMTS1, GRN, CPXM2, CDC42EP3, ELN, GADD45B, GLG1, PROCR, C1R, IGFBP2, NNMT, DKK2, CTSK, FGL2, DEPP1, KCNN4, SEMA3F, GJA5, GAS6, TCN2, BTG2, CLU, CFH, SULF1, APLP2, MMRN1, LOX, SKIL, JUN, KCNMB1, THBD, PDGFD, MMP2, MMRN2, SDF4, PPP1R15A, CARD16, HAPLN3, HEXB, METRNL, MRC2, DHRS3, HSPA1B, EMP3, SERPINE2, PTGS1, GABARA…	C8
HU_FETAL_RETINA_RGC	2.11447e-08	4.17809e-06	0.733762	-0.304932	-1.85858	398	RBFOX3, VSTM2L, CRABP1, AP3S1, XPR1, STX1A, NELL2, PRUNE2, SLC38A1, FAR2, FXYD7, JPT1, KPNA2, SLIT1, SCG5, GLRX, CRABP2, MEAF6, STMN3, AKR1C1, TP53I11, TMEM59L, FXYD6, WASF1, RAB3A, TXN, SYT7, ARL6IP5, INA, TBPL1, TMEM14A, PCMT1, RCN1, ATP6V1H, CNR1, HSPA12A, MLLT11, GDAP1L1, HMGCS1, TUBB, TRIM36, CD24, ELAVL4, VAT1, RAB6A, RGS10, ATL1, MAPK10, TMSB10, YWHAZ, TENM3, KIF3C, SEC61G, CDKN2D, MAP1B, …	C8		Retinal Ganglion Cells
MODULE_60	2.16148e-08	4.23863e-06	0.733762	-0.30959	-1.87022	369	RPS26, HLA-DQB1, CRABP1, MFAP4, IGF2, EIF4EBP1, FGFR1, CD151, COL1A2, MYH11, GAS1, GOT1, TPM2, MYL9, COL6A2, PCOLCE, SVIL, AKR1C1, FBLN2, TP53I11, SORBS2, IGFBP6, LGMN, IGFBP4, GRN, AGPAT2, TGFBI, CITED2, VTN, SLC29A1, ELN, SPTB, FN1, MAP2K3, IGFBP2, NNMT, IL32, COL15A1, PLAU, PLK3, CLEC3B, DEPP1, PTGIS, CARD10, C2, SEMA3F, LTBR, S100A4, TNFAIP2, CST7, CFD, LST1, VEGFA, CRIP1, TNFRSF1B, OGG1, M6P…	C4	CM	Heart genes.
KAAB_HEART_ATRIUM_VS_VENTRICLE_UP	2.26141e-08	4.40125e-06	0.733762	-0.359463	-2.04648	228	CD47, FMOD, LILRA4, ZNF208, STAT4, CDO1, PRUNE2, TAGLN, ACTA2, MYH11, GAS1, ALDH1A2, PPIB, AKR1C1, FBLN2, PDLIM4, IGFBP6, MR1, GRN, ISLR, ERBB4, F10, TGFB1I1, EPB41L3, ERGIC3, C1R, SND1, KDELR2, FGL2, PTGIS, TMED3, BTG1, GJA5, VAT1, NR2F2, CRIP1, CFH, GNB5, TOR1A, PRSS23, NUPR1, NSF, FBLN1, HSPG2, ZNF365, ROR2, MAP1B, EXOSC2, TIMP3, MYL6, BASP1, NMNAT2, ACTN1, CHRNE, PDE8B, SMAD7, PRKCD, PRELP, C…	C2	CGP	Genes up-regulated in the atria of healthy hearts, compared to venticles.
TRAVAGLINI_LUNG_MACROPHAGE_CELL	2.46946e-08	4.7703e-06	0.733762	-0.388321	-2.15997	191	HLA-DQA1, HLA-DQB1, HLA-DRB5, OTUD1, SIGLEC1, MARCO, CTSB, GPX1, HLA-DRB1, SERPING1, GRN, BID, TGFBI, PGD, FN1, AQP9, DAB2, MRC1, IGFBP2, DEFB1, HCK, VAT1, TUBA1C, RETN, LTA4H, TNFAIP2, VDAC1, C3AR1, ATP6V1B2, ANXA2, APLP2, NUPR1, S100A11, AP2S1, S100A10, FCGR2A, TYROBP, IL1RN, ACP5, CCRL2, NPC2, SOD2, YWHAH, CD74, ACTN1, MMP19, PPT1, HEXB, SDCBP, ATP6V1F, P2RX4, MCEMP1, GPX3, PLEKHB2, CSTB, FCER…	C8
GOBP_DEFENSE_RESPONSE_TO_OTHER_ORGANISM	2.50016e-08	4.79383e-06	0.733762	-0.254581	-1.6419	738	STYK1, PCBP2, CD47, SLPI, LILRA4, PIK3CG, ARG2, MFAP4, COCH, GNLY, TNFSF8, CLEC2A, PAK1, CIITA, AGBL4, FCGR2B, ASS1, MARCO, TRIM58, MFHAS1, C1S, HSP90AB1, CFB, PPBP, SERPING1, POLR3B, CEBPB, CCL19, ANXA1, RNF19B, MR1, CNPY3, GRN, VAMP8, CD6, CD180, ISG20, FCGR1A, CD209, SERINC3, PVR, MYO1C, ADARB1, MRC1, C1R, ARRB2, MAP3K14, OPRK1, PLD4, IL10, APOBEC3C, APOBEC3G, APOBEC3F, FGL2, TUBB, POLR3A, RNF…	C5	GO:BP	Reactions triggered in response to the presence of another organism that act to protect the cell or organism from damage caused by that organism. [GOC:dos]
DESCARTES_FETAL_THYMUS_STROMAL_CELLS	2.53534e-08	4.82553e-06	0.733762	-0.442004	-2.28541	122	COL1A1, FMOD, MFAP4, OGN, IGF2, COL14A1, COL1A2, GJC1, FKBP9, GAS1, CRABP2, PCOLCE, SCARA5, COL3A1, C1S, ADAMTS15, FBLN2, MGP, DNAJC25, SERPING1, ISLR, DCN, HTRA3, CCN3, ELN, KARS1, C1R, OLFML3, PDPN, COL12A1, S1PR3, RCN3, LOX, FBLN1, ADAM33, MMP2, LUM, C3, FSTL1, METRNL, ADAMTSL4, MRC2, CCDC8, SSC5D, POSTN, SERPINE2, CCDC80, PLAC9, GPX8, SEMA3C, ADAM12	C8		descartes DE_gene_by_organ.csv, fold.change>5, qval<0.05, pval<0.05
MANNO_MIDBRAIN_NEUROTYPES_HRGL2B	2.59625e-08	4.90539e-06	0.733762	0.33729	1.87751	384	ELOVL2, BTN3A3, HEY2, DBX2, VSTM4, AAMDC, WWC1, SESN3, QDPR, SCD5, HEPACAM, H2AX, LIX1, HEPN1, ITGA6, SLC39A12, PDE1C, PREX1, LRP2, EEPD1, LFNG, BCAN, SCD, ABAT, MPZ, PRKD3, DDAH1, CRYAB, PARD3B, WDR93, KIF15, IFI27L2, TSPAN18, ARAP2, BRCA1, BUB1B, GABRG1, MTSS2, PDLIM5, CCDC146, SPARCL1, GNG7, METRN, SPECC1, NSMF, INPPL1, VEPH1, ARHGEF4, CENPE, QKI, SALL1, ACBD7, SOX21, FOXJ1, ACSS1, EGFR, PDLIM…	C8		Cell types are named using anatomical and functional mnemonics prefixed by 'm' or'h' to indicate mouse and human respectively: OMTN, oculomotor and trochlear nucleus; Sert, serotonergic; NbM, medial neuroblast; NbDA, neuroblast dopaminergic; DA0-2, dopaminergic neurons; RN, red nucleus; Gaba1-2, GABAergic neurons; mNbL1-2, lateral neuroblasts; NbML1-5, mediolateral neuroblasts; NProg, neuronal pr…
DESCARTES_FETAL_THYMUS_ANTIGEN_PRESENTING_CELLS	2.66889e-08	5.00611e-06	0.733762	-0.423186	-2.25816	141	BATF3, ZNF366, TLR10, HLA-DRB5, TSPAN13, LGMN, QPCT, HLA-DRB1, CCL19, F13A1, PLEK, SPINT1, MS4A6A, PLD4, HLA-DOB, FGL2, APOBR, HLA-DRA, HCK, CST7, ABCC4, MYO1F, IL18, PLCB2, CD163L1, SPI1, FGD2, CD68, DAPP1, MNDA, TYROBP, NABP1, IL1RN, IL18R1, RGS1, CD84, SAMSN1, CD74, FLT3, ADAP2, IL4I1, ADAM8, IRF8, HLA-DMB, CLEC7A, TMEM176B, CD86, SLC16A3, FCER1G, ALOX5, C1QA, SLC15A3, GPR132, CD14, EBI3, C1QB…	C8		descartes DE_gene_by_organ.csv, fold.change>5, qval<0.05, pval<0.05
DESCARTES_FETAL_KIDNEY_STROMAL_CELLS	2.94728e-08	5.48852e-06	0.733762	-0.453371	-2.30566	112	COL1A1, LTBP2, SERPINF1, ACTG2, OGN, COL14A1, COL1A2, MGAT4C, OSR1, SCARA5, COL3A1, FBLN2, MGP, TBX15, IGFBP6, CCL19, ISLR, AOX1, MEDAG, DCN, F10, HTRA3, CCN3, C1R, KDELR3, PTPRT, DKK2, COL12A1, SLC22A3, PCOLCE2, SULF1, NUPR1, LOX, APOD, NRXN2, LUM, PODN, ARHGAP20, PRELP, ADAMTSL4, POSTN, WNT2B, LPL, PLAC9, PTX3, OLFML2B	C8		descartes DE_gene_by_organ.csv, fold.change>5, qval<0.05, pval<0.05
LINDVALL_IMMORTALIZED_BY_TERT_DN	3.05356e-08	5.64582e-06	0.719513	-0.550529	-2.5229	64	FMOD, LTBP2, EIF2B3, AKR1C1, CFB, ISLR, CPXM2, PTK7, ELN, FN1, NNMT, CTSK, PDPN, CRIP1, HSPG2, MAP1B, ARL4D, MDFI, CCN1, CAPN5, CCDC80, ENO2, LHFPL2, ADAM12, SLIT3, CDON, ELP5, CELF2, LGALS3BP, LAMA4, PAPPA, SLC7A1, AKAP12, SELPLG, ARL4C, PTGES, CREG1, CRIP2, VPS26B, EGR1, SLC43A3	C2	CGP	Genes down-regulated in BJ cells (foreskin fibroblasts) immortalized by expression of TERT [GeneID=7015].
ANASTASSIOU_MULTICANCER_INVASIVENESS_SIGNATURE	3.39877e-08	6.23952e-06	0.719513	-0.567978	-2.5526	59	COL1A1, SERPINF1, ITGBL1, ACTA2, COL1A2, COL6A2, PCOLCE, COL3A1, COL6A3, DCN, FN1, PLAU, CTSK, NID2, SULF1, RCN3, COPZ2, LOX, MMP2, LUM, TIMP3, EDNRA, POSTN, CDH11, PDGFRB, OLFML2B, ADAM12, GLT8D2, LGALS1, COL11A1, INHBA, SNAI2, AEBP1, PRRX1, CRISPLD2, SFRP4	C2	CGP	Invasiveness signature resulting from cancer cell/microenvironment interaction.
REACTOME_SIGNALING_BY_INTERLEUKINS	3.45045e-08	6.28978e-06	0.719513	-0.311311	-1.88421	380	H3C12, PSMD4, CRLF1, STAT4, CREB1, STX1A, COL1A2, SOCS3, APP, PSMA7, IL17RE, POMC, UBE2V1, PSMD13, CCL19, ANXA1, F13A1, OPRM1, STAT6, FN1, PSMD1, H3C6, MAP2K3, PIK3CB, IL32, CSF3, IL10, UBE2N, CNN2, HNRNPF, PSMB3, VAV1, IL1RL2, MAP2K6, HCK, UBC, BLNK, MYC, IL27RA, IL12RB1, MAPK10, VEGFA, CEBPD, TNFRSF1B, IL18, ANXA2, PRKACA, NKIRAS1, YWHAZ, PTPN9, CCR5, CCL5, LCP1, PPP2CA, TNFRSF1A, SKP1, JUN, SY…	C2	CP:REACTOME	Signaling by Interleukins
chr1q44	3.50432e-08	6.34331e-06	0.719513	0.645388	2.51336	41	OR2L13, OR2L2, OR2L5, OR2L3, OR2AK2, OR2M4, OR2L8, OR2M3, OR2M2, OR2M5, HNRNPU	C1		Ensembl 103 genes in cytogenetic band chr1q44
GSE29618_PDC_VS_MDC_DAY7_FLU_VACCINE_DN	3.54918e-08	6.3799e-06	0.719513	-0.384555	-2.12165	182	ITGA5, PAK1, CIITA, ADAM28, QPCT, CEBPB, ANXA1, PFN1, PLXNC1, IFI30, PIK3CB, CNN2, FGL2, APOBR, HLA-DRA, HCK, NIBAN1, S100A4, TNFAIP2, CST7, VDAC1, RGS10, LST1, AIF1, CEBPD, PPA1, IL18, ANXA2, SLC2A3, APLP2, ACTG1, S100A10, FCGR2A, PTGER4, MNDA, PLAAT4, CSF1R, IL1RN, LGALS9, LAT2, AOAH, BASP1, ACTN1, GDI2, ATP2B1, CASP1, ADAM8, PID1, DHRS3, ZFP36L1, HK2, LIMS1, CLEC7A, CRYBG1, KCTD12, COTL1, IFIT…	C7	IMMUNESIGDB	Genes down-regulated in comparison of plasmacytoid dendritic cells (DC) from influenza vaccinee at day 7 post-vaccination versus myeloid DCs at day 7 post-vaccination.
MODULE_88	3.64737e-08	6.51119e-06	0.719513	-0.265942	-1.69786	647	GSTM5, APOC2, HLA-DQB1, SLPI, COL1A1, CRLF1, CRABP1, PDE4C, STX1A, IGF2, EIF4EBP1, FGFR1, ITGA5, DSP, CD151, COL1A2, MYH11, GAS1, GOT1, ALDH1B1, EPCAM, TPM2, ADH1B, SCG5, GLRX, MYL9, CYP2C8, COL6A2, PCOLCE, ITIH2, COL3A1, C1S, AKR1C1, COL6A3, COL18A1, FBLN2, CFB, SORBS2, PPBP, SLC22A6, IGFBP6, LGMN, QPCT, IGFBP4, GRN, SLC38A10, CD6, MPPED1, TGFBI, F10, CITED2, VTN, CYP2E1, IQGAP2, ELN, CYB5A, EPB…	C4	CM	Heart, liver, kidney and pancreas metabolic and xenobiotic response genes.
FAN_OVARY_CL5_HEALTHY_SELECTABLE_FOLLICLE_THECAL_CELL	3.68875e-08	6.53996e-06	0.719513	-0.330581	-1.95118	298	RPS26, CAND1, COL1A1, FRZB, SERPINF1, COL1A2, KPNA2, TPM2, GLRX, TPM4, COL6A2, PCOLCE, CPXM1, COL3A1, COL6A3, COL18A1, PRKAR1A, PLAGL1, NRP1, APEX1, RCN1, LAMC1, PTK7, CITED2, HTRA3, GADD45B, EIF3M, PTTG1, CACYBP, COL15A1, CTSK, AKIRIN2, RBMS1, C7, BAG3, LAMB1, UBC, SCPEP1, COL4A2, COL4A1, NR2F2, NID2, GBP1, MPG, PPP3CA, PPP2CA, GYPC, NEXN, JUN, APOD, ING1, RHBDD2, ARL4D, MMP2, MYL12B, TSPAN5, CC…	C8		TC from (healthy) follicles, such as follicles A, B, and C, were mainly clustered in CL5 (Fig. 4a), characterized by expression of known markers PTH1, APOD, APOC1, and several genes not earlier associated with TC, such as WFDC1, MATN2, COLEC11 (Fig. 7a). TC from the small antral follicles A and B did not overlap with TC from selectable follicle C in CL5 (Fig. 4a).
GSE43955_1H_VS_20H_ACT_CD4_TCELL_WITH_TGFB_IL6_DN	3.73415e-08	6.57541e-06	0.719513	-0.388279	-2.13447	176	APOC2, MARK1, TAGLN, FGFR1, NCK2, COL1A2, ADAM28, GLRX, EPHA6, MGP, CFB, AOC3, NRP1, RNF19B, MYH7, VCL, ISG20, DCN, PTTG1, NNMT, FRRS1, KDELR3, KCNH1, CSF3, IL10, CTSK, TUBB, ECM1, GNAI2, NEDD4L, CCT6A, C3AR1, SCAMP1, COPA, NUPR1, FRMD6, HIC1, KLHL7, MDFI, FOLR2, ACP5, CLPTM1L, CASP4, LY6E, NFKBIZ, DHRS7, TIMP3, BASP1, WWTR1, IRF8, CSF2RB, TNPO3, HK2, PTPRR, TMEM176B, ACTR3, LPL, SERPINE2, PLAC9,…	C7	IMMUNESIGDB	Genes down-regulated in CD4 [GeneID=920] T helper cells Th17 treated with TGFB1 and IL6 [GeneID=7040;3569]: 1h versus 20h.
DESCARTES_FETAL_LIVER_MESOTHELIAL_CELLS	4.32444e-08	7.55164e-06	0.719513	-0.345006	-1.98967	250	PTGFRN, SLPI, LSAMP, OGN, COL8A1, FXYD7, ABI3BP, GABRB2, MAD2L1BP, GAS1, MGAT4C, ALDH1A2, THSD4, EPHA6, IL17RE, OSR1, CFAP299, ADAMTS15, FOXC1, PRDM6, MGP, PDLIM4, LAMC2, AOX1, MEDAG, ERBB4, ELN, SPINT1, PPM1E, C1QTNF1, PROCR, CAVIN3, PTPRT, PDPN, DPP4, COL12A1, KRT18, GAS6, GSTM3, LMO4, CRIP1, SULF1, ELFN1, LOX, GRIA4, HS6ST3, TENM3, ARL4D, TGM1, S100A10, COL8A2, SMOC2, MSLN, KLF5, DISP1, VIT, N…	C8		descartes DE_gene_by_organ.csv, fold.change>5, qval<0.05, pval<0.05
GOBP_RESPONSE_TO_CYTOKINE	4.3469e-08	7.55164e-06	0.719513	-0.254675	-1.64137	717	PLVAP, CD47, CTH, GPS2, COL1A1, LILRA4, CRLF1, STAT4, CYP1B1, HYAL3, CREB1, SPHK1, PAFAH1B1, SOCS3, CIITA, KLF2, APP, ASS1, ALDH1A2, IL17RE, PCSK1, COL3A1, FOXC1, HSP90AB1, PPP3CB, LILRB5, PPBP, ADIPOR1, CEBPB, CCL19, THBS1, INA, ANXA1, GPR35, IMPDH2, AGPAT2, ADAM23, ASAH2, TNFRSF21, ATIC, STAT6, MYO1C, LEPR, MRC1, SELE, CACYBP, PTPRT, CSF3, CD300LF, MRPL15, CD24, SRSF7, PTGIS, ECM1, EIF5A, KRT18…	C5	GO:BP	Any process that results in a change in state or activity of a cell or an organism (in terms of movement, secretion, enzyme production, gene expression, etc.) as a result of a cytokine stimulus. [GOC:sl]
ZHU_CMV_ALL_DN	5.79868e-08	1.00066e-05	0.719513	-0.456933	-2.30072	106	COL1A1, CYP1B1, IGF2, TAGLN, ACTA2, CD151, COL1A2, PAFAH1B1, GAS1, TPM2, ADH1B, TPM4, COL6A2, COL3A1, AKR1C1, GPX1, THBS1, ANXA1, MATK, IGFBP3, C1R, IGFBP2, BMP4, CNN2, PTGIS, RBMS1, RUNX1, CFD, NR2F2, CEBPD, SGCG, TNFRSF1A, LOX, FBLN1, ACTG1, TRAM2, CXCL12, WEE1, CHN1, TIMP3, POSTN, ZFP36L1, CDH11, ANAPC1, MAPK14, ANPEP, MARCKS, TP53BP1, IGFBP5, LAMA4, SERPINE1, ACO1	C2	CGP	Down-regulated at any timepoint following infection of primary human foreskin fibroblasts with CMV
QI_PLASMACYTOMA_UP	5.86222e-08	1.00492e-05	0.719513	-0.360805	-2.04716	221	CD47, ACTG2, CIITA, ABI3, MARCO, HRK, PPBP, ARL6IP5, CCL19, PFN1, NTN1, PLXNC1, GNA15, ADCY7, PDLIM7, PLEK, ANXA11, CDC42EP3, CNN2, FGL2, DPP4, VAV1, BTG1, SLA, MKRN1, LASP1, MTPN, HCK, STK10, IL27RA, TNFAIP2, CST7, CLU, LST1, TMSB10, IL18, GPSM3, LRRFIP1, SP100, CCR5, CCL5, LCP1, TRIM5, ACTR2, GNG10, CD53, FAS, PTPN6, DAPP1, CCL3, CSF1R, LGALS9, RGS1, CASP4, BATF, CD37, CD4, FLT3, CCR1, CASP1, A…	C2	CGP	Up-regulated genes that best disciminate plasmablastic plasmacytoma from plasmacytic plasmacytoma tumors.
GOBP_LEUKOCYTE_CELL_CELL_ADHESION	6.04101e-08	1.02876e-05	0.704976	-0.323365	-1.9083	301	CCL28, CD47, PRNP, HLA-DQA1, HLA-DQB1, ARG2, MADCAM1, NDFIP1, IGF2, NCK2, ITGA5, HLA-DRB5, FCGR2B, ASS1, PRKAR1A, HLA-DRB1, CEBPB, CCL19, ANXA1, CD6, TNFRSF21, FLOT2, CD209, MIA3, IGFBP2, SELE, IL10, HLA-DOB, NR4A3, BMP4, FGL2, CD24, DPP4, HLA-DRA, VAV1, IL1RL2, CD300A, SOX4, STK10, RUNX1, EFNB3, IL27RA, IL12RB1, VNN1, AIF1, LAPTM5, IL18, CYRIB, CCL5, F11R, RPS3, RHOH, CD27, SYK, PTPRC, PTPN6, IT…	C5	GO:BP	The attachment of a leukocyte to another cell via adhesion molecules. [GOC:go_curators]
GAO_LARGE_INTESTINE_24W_C1_DCLK1POS_PROGENITOR	6.59174e-08	1.11521e-05	0.704976	-0.473892	-2.34598	95	GSTM5, COL1A1, SERPINF1, OGN, COL14A1, COL8A1, COL1A2, CPZ, ADAMTS2, PCOLCE, CPXM1, COL3A1, C1S, MGP, TMEM59L, PLAGL1, ADAMTS1, SERPING1, ISLR, DCN, C1R, NNMT, PDPN, C7, MYC, MAPK10, LAMA2, CTHRC1, GBP1, RCN3, LOX, FBLN1, MMP2, LUM, C3, BASP1, HAPLN3, MRC2, SPTLC3, PRICKLE1, CCDC80	C8
GAUSSMANN_MLL_AF4_FUSION_TARGETS_F_UP	7.04527e-08	1.1842e-05	0.704976	-0.39378	-2.14647	166	FMOD, ARHGAP28, SSBP4, LTBP2, ACTG2, OGN, GAS1, LMO7, ADAMTS2, OSR1, COL6A2, COL3A1, L3HYPDH, C1QTNF1, RBM26, DAB2, OLFML3, NR4A3, BMP4, FAM43A, NPR3, CARD10, DKK3, ECM1, GAS6, DNASE2, BTG2, CEBPD, IL18, SLC16A4, LOX, FBLN1, STING1, SLC7A2, ADGRG6, LGALS9, PLCG2, FGF5, LY6E, NFKBIZ, SDF4, RGS4, ADAMTSL4, PDGFB, CX3CL1, PNRC1, RRAD, LY6H, ZFP36L1, ARHGEF3, MME, TMEM176B, FCGRT, PRICKLE1, PLAC9, MA…	C2	CGP	Up-regualted genes from the set F (Fig. 5a): specific signature shared by cells expressing AF4-MLL [GeneID=4299;4297] alone and those expressing both AF4-MLL and MLL-AF4 fusion proteins.
MEISSNER_NPC_HCP_WITH_H3_UNMETHYLATED	7.0962e-08	1.18507e-05	0.704976	-0.301509	-1.84882	425	PRLHR, NAPRT, RMDN2, PHF1, SLC26A8, LHFPL5, SEC31B, SLC47A1, CDO1, TCF20, FAR2, P2RX5, IRF6, ALDH1B1, TPM2, SLIT1, NAP1L5, WNT3, SLC16A11, ASS1, DES, TRIM58, TMEM59L, IGFBP6, ANO1, LAMC2, EHBP1L1, FLOT2, PIK3R5, TDRD1, ADCY7, TMEM30B, HTRA3, CCN3, ANXA11, WDR86, CALN1, TFCP2L1, HSPA12A, SHD, CAVIN3, DMGDH, GPR26, NR4A3, CCDC158, TRIM36, PTGIS, DKK3, KRT18, LTBR, MAPK13, NIBAN1, AFAP1L1, EFNB3, IL…	C2	CGP	Genes with high-CpG-density promoters (HCP) that have no histone H3 methylation marks in neural precursor cells (NPC).
PICCALUGA_ANGIOIMMUNOBLASTIC_LYMPHOMA_UP	7.57641e-08	1.25715e-05	0.704976	-0.372574	-2.0863	200	COL1A1, MFAP4, CYP1B1, TAGLN, ACTA2, COL1A2, GJC1, ABI3BP, MYL9, CYP26B1, PCOLCE, COL3A1, C1S, CFB, ADAMTS1, CCN4, SERPING1, CCL19, LAMC1, FN1, DAB2, C1R, NNMT, COL15A1, PDPN, DEPP1, COL12A1, C7, LAMB1, FAM20A, COL4A2, COL4A1, CLU, NR2F2, CFH, ITPRIPL2, S1PR3, IL18, SULF1, CTHRC1, GUCY1A1, NEXN, HSPG2, PGF, TPM1, COL8A2, SMOC2, NAGK, LUM, CXCL12, RSPO3, C3, WWTR1, FSTL1, RRAS, SAMD9L, TMEM176B, K…	C2	CGP	Up-regulated genes in angioimmunoblastic lymphoma (AILT) compared to normal T lymphocytes.
GOBP_REGULATION_OF_CELL_CELL_ADHESION	7.79275e-08	1.28481e-05	0.704976	-0.302094	-1.8186	361	CCL28, CD47, PRNP, HLA-DQA1, HLA-DQB1, ARG2, NDFIP1, IGF2, NCK2, HLA-DRB5, EPCAM, FCGR2B, ASS1, PRKAR1A, HLA-DRB1, CEBPB, CCL19, ANXA1, CD6, TNFRSF21, FLOT2, CITED2, CD209, GCNT2, JAG1, C1QTNF1, MIA3, IGFBP2, SELE, IL10, HLA-DOB, NR4A3, BMP4, PDPN, FGL2, CD24, DPP4, HLA-DRA, VAV1, IL1RL2, CD300A, SOX4, RUNX1, EFNB3, IL27RA, IL12RB1, VEGFA, VNN1, AIF1, LAPTM5, IL18, CYRIB, CCL5, F11R, MMRN1, RPS3,…	C5	GO:BP	Any process that modulates the frequency, rate or extent of attachment of a cell to another cell. [GOC:isa_complete]
DESCARTES_MAIN_FETAL_IGFBP1_DKK1_POSITIVE_CELLS	8.86295e-08	1.45201e-05	0.704976	-0.433144	-2.22193	117	ZNF416, LTBP2, LRRN4CL, MFAP4, ABI3BP, GAS1, CPXM1, SCARA5, ADAMTS15, ADAMTS1, IGFBP6, SERPING1, IGFBP4, ISLR, AOX1, ATP2B4, DCN, CITED2, CRYGN, GDF7, C1QTNF1, CNR1, ALOX15B, CTSK, DEPP1, IGSF10, CFD, OSGIN2, GBP1, COPZ2, NFE2L1, APOD, ING1, SLC37A3, MMP2, LUM, MMP19, ATP13A3, UBE2L6, RRAS, SSC5D, IL1RL1, CHI3L2, F2R, WNT5A	C8		descartes DE_gene_77_main_cell_type.csv, fold.change>=1.5, qval<0.05, pval<0.05
RUBENSTEIN_SKELETAL_MUSCLE_NK_CELLS	8.97413e-08	1.46098e-05	0.704976	-0.361867	-2.04279	210	CD47, RPS26, GNLY, GLRX, PSMA7, HOPX, TPM4, CAPZB, ANXA1, VAMP8, PFN1, EIF4A1, PLEK, HCST, GADD45B, CLIC1, ARPC2, TUBB, HNRNPF, BTG1, FYB1, SSR2, S100A4, CST7, LAPTM5, ACTB, YWHAZ, GPSM3, TLE5, CYRIB, LIMD2, CCL5, LCP1, RPS3, ARPC1B, ACTG1, JUN, PTPRC, CCL4, BIN2, CD53, TYROBP, PLAAT4, CCL3, PRELID1, CASP4, CD37, DHRS7, MYL12A, CORO1A, IGF2R, ARPC3, CALM1, JAK1, ARHGDIB, XBP1, CD48, SUB1, IFITM2,…	C8
GOBP_POSITIVE_REGULATION_OF_RESPONSE_TO_EXTERNAL_STIMULUS	9.22055e-08	1.49171e-05	0.704976	-0.311152	-1.85857	336	CD47, PIK3CG, TLR10, COCH, FGFR1, PAK1, APP, KDR, MCU, CCN4, LGMN, POLR3B, NRP1, CEBPB, CCL19, THBS1, GRN, VAMP8, OPRM1, CD180, PVR, STK24, CNR1, KARS1, CAMK1D, AKIRIN2, VAV1, MAPK13, GAS6, HCK, OASL, NINJ1, C3AR1, VEGFA, AIF1, IL18, GPSM3, CCL5, TRIM5, SPI1, NUPR1, AP1G1, TNFRSF1A, PRKDC, NLRP1, PGF, SYK, STING1, CCL4, BMP6, THBD, PDGFD, PTGER4, MNDA, SMOC2, TYROBP, CCL3, CSF1R, LGALS9, CXCL12, …	C5	GO:BP	Any process that activates, maintains or increases the rate of a response to an external stimulus. [GOC:mah]
GOCC_PLATELET_ALPHA_GRANULE	1.00194e-07	1.61088e-05	0.704976	-0.521117	-2.45	72	VPS33B, PHACTR2, IGF2, APP, PPBP, SERPING1, THBS1, ISLR, F13A1, FN1, GAS6, SERPINA3, ALDOA, CFD, CLU, VEGFA, CYRIB, APLP2, MMRN1, PCYOX1L, SNCA, ACTN1, FERMT3, OLA1, PDGFB, SERPINA5, SERPINE2, ITGB3, LHFPL2, TREML1, PECAM1, SERPINA1, SRGN, PROS1, TGFB1, TEX264, SERPINE1, KNG1, PCDH7	C5	GO:CC	A secretory organelle found in blood platelets, which is unique in that it exhibits further compartmentalization and acquires its protein content via two distinct mechanisms: (1) biosynthesis predominantly at the megakaryocyte (MK) level (with some vestigial platelet synthesis) (e.g. platelet factor 4) and (2) endocytosis and pinocytosis at both the MK and circulating platelet levels (e.g. fibrin…
FAN_OVARY_CL17_PUTATIVE_APOPTOTIC_SMOOTH_MUSCLE_CELL	1.04025e-07	1.66215e-05	0.704976	-0.362318	-2.05427	220	PEA15, FRZB, TAGLN, FGFR1, ACTA2, CD151, MYH11, TPM2, MYL9, COL18A1, PRKAR1A, HSP90AB1, FXYD6, ADAMTS1, AKAP13, EIF4A1, NAA50, GADD45B, MAP2K3, DUSP14, CACYBP, NR4A3, HNRNPF, NUDT4, BAG3, TUBA1C, CCT6A, NDUFA4L2, COL4A1, GEM, TNFRSF1A, C11orf96, IER3, PGF, MAP1B, CCT5, TPM1, SOD1, TUBB4B, SLC3A2, TIMP3, MYL6, ACTN1, RAN, CDKN1A, TNFRSF12A, CALM1, XBP1, PNRC1, EDNRA, LIMS1, DNAJB6, GPX3, MRTO4, TM…	C8		The clusters of smooth muscle cells (CL14, CL17) also showed features of growth and remodeling: many DEGs of CL17 (such as CRYAB, GJA4) were involved in regulation of immune response and apoptosis, whereas DEGs of CL14 (such as ACTA2, PLN, ADIRF, and MYH11) associated with mature smooth muscle cells (Fig. 3e-g).
FOROUTAN_TGFB_EMT_UP	1.09209e-07	1.73429e-05	0.704976	-0.382703	-2.10629	177	PEA15, COL1A1, CRLF1, TAGLN, ITGA5, SPHK1, MATN3, ANKLE2, SCG5, MYL9, TPM4, COL3A1, COL6A3, THBS1, LAMC2, TGFBI, PDLIM7, TGFB1I1, GADD45B, JAG1, FN1, DAAM1, KDELR3, COL4A2, COL4A1, SLC26A2, SACS, LOX, SKIL, ZNF365, JUN, RFTN1, TPM1, MMP2, LUM, GLIPR1, FOXD1, NRIP3, ACTN1, RGS4, SMAD7, HMOX1, PODXL, CCN2, MRC2, PID1, POSTN, WNT5A, C3orf52, CDH11, MAF, SERPINE2, ITGB3, TGM2, SLN, HRH1, ALOX5AP, SEM…	C2	CGP	Genes up-regulated in the epithelial-mesenchymal transition (EMT) upon transforming growth factor beta (TGFb) stimulation derived from multiple datasets by combining results from an integrative approach and a product of ranks meta-analysis approach.
NAKAYAMA_SOFT_TISSUE_TUMORS_PCA1_UP	1.14309e-07	1.80421e-05	0.704976	-0.52407	-2.44161	69	HLA-DQA1, HLA-DQB1, ITGBL1, SIGLEC1, FCGR2B, C1S, CFB, THBS1, F13A1, ISG20, DCN, FCGR1A, MRC1, IFI30, NNMT, ARHGAP15, HLA-DRA, ECM1, SLA, S100A4, AIF1, CFH, CCL5, DOCK2, ITGAM, BIN2, FCGR2A, CSF1R, LUM, C3, NCKAP1L, MME, TMEM176B, C1QA, SLC15A3, CTSC, CD14, C1QB, KYNU, SERPINA1, SERPINE1, MS4A4A, GABBR1, FHL2	C2	CGP	Top 100 probe sets contrubuting to the positive side of the 1st principal component; predominantly associated with spindle cell and pleomorphic sarcoma samples.
GSE3039_ALPHAALPHA_VS_ALPHABETA_CD8_TCELL_UP	1.16157e-07	1.82226e-05	0.704976	-0.374968	-2.08054	188	CCDC115, TMEM183A, DHX32, SSBP4, CTSV, LSR, ANKRD37, SOCS3, BYSL, MATN3, FCGR2B, DCAF1, HTR7, RPS27L, POP4, CCN4, IGFBP6, DCN, DAB2, C1R, KDELR2, PLAU, PDPN, ALDOA, MYC, NIBAN2, CCR5, SCAMP1, F11R, GPAT3, NUPR1, JUN, IER3, CCL4, AP2S1, MTCH1, S100A10, LRPAP1, LXN, PRELID1, IKBKE, COMTD1, AP2M1, BASP1, CCR1, CPED1, CDKN1A, IGF2R, HSPA1B, RAB11A, GPX3, MRTO4, CTPS1, TPI1, LDHA, LRP12, CCDC80, STRIP…	C7	IMMUNESIGDB	Genes up-regulated in T cells: CD8A [GeneID=925] versus CD8A CD8B [GeneID=925;926].
GOBP_EXTERNAL_ENCAPSULATING_STRUCTURE_ORGANIZATION	1.17018e-07	1.82471e-05	0.704976	-0.32576	-1.89389	260	COL1A1, FMOD, CTSV, MFAP4, FBLN5, CYP1B1, COL14A1, COL8A1, COL1A2, FOXC2, ABI3BP, MYH11, OLFML2A, APP, THSD4, ADAMTS2, PHLDB2, RIC8A, COL3A1, ADAMTS15, FOXC1, COL18A1, FBLN2, NTN4, ADAMTS1, B4GALT1, TGFBI, LAMC1, ELN, SPINT1, COL15A1, CTSK, EXOC8, PDPN, DPP4, COL12A1, COLGALT1, GAS6, LAMB1, RUNX1, COL4A2, COL4A1, CSGALNACT1, NID2, TNFRSF1B, SULF1, LCP1, TNFRSF1A, LOX, FBLN1, TGM1, ERO1A, HRNR, MM…	C5	GO:BP	A process that is carried out at the cellular level which results in the assembly, arrangement of constituent parts, or disassembly of external structures that lie outside the plasma membrane and surround the entire cell. [GOC:ai, GOC:dph, GOC:jl, GOC:mah]
FAN_OVARY_CL9_PUTATIVE_APOPTOTIC_ENDOTHELIAL_CELL	1.18594e-07	1.83821e-05	0.704976	-0.306967	-1.83904	349	PHACTR2, HLA-DRB5, SOCS3, APP, PSMA7, MGP, GPX1, HLA-DRB1, TXN, THBS1, ANXA1, EIF3I, EIF4A1, RCN1, TUBB6, CDC42EP3, DAB2, MAP2K3, SELE, NNMT, DEPP1, HNRNPF, EFNA1, G3BP1, BTG1, RBMS1, EIF5A, KRT18, BAG3, UBC, TUBA1C, CLU, CEBPD, PPA1, ANXA2, LRRC8C, MBNL1, LRRFIP1, SP100, SLC2A3, CTHRC1, GBP1, PRSS23, ANKRD28, PPP3CA, ARPC1B, NUPR1, TNFRSF1A, IER3, HLA-B, STING1, ARHGDIA, KLF6, TUBB4B, HLA-A, ZNF…	C8		We identified three separate clusters (CL) of endothelial cells (CL7, CL9, CL16) expressing markers associated with lymph and blood vascular system (such as PECAM1, CD34, CTGF), but also associated with remodeling and inflammatory response (such as TXNIP, ANGPT2) (Fig. 3a-d). The DEGs of CL7 (such as CCL14, SOCS3, EGFL7) and CL16 (such as CCL21, TFF3) are linked to angiogenesis and lymphatics, re…
MENON_FETAL_KIDNEY_10_IMMUNE_CELLS	1.20293e-07	1.85344e-05	0.690132	-0.506968	-2.39421	74	CAPZB, GPX1, HLA-DRB1, CNPY3, VAMP8, PFN1, DAB2, OAZ1, ARPC2, FGL2, HLA-DRA, FYB1, S100A4, RGS10, LST1, TMSB10, AIF1, LAPTM5, ACTB, LRRFIP1, LCP1, ARPC1B, ACTR2, S100A11, HLA-B, PTPRC, KLF6, MNDA, TYROBP, HLA-A, HLA-E, CD74, MYL6, CORO1A, ARPC3, ARHGDIB, COTL1, MAF, TOP1, LGALS1, RPL12, SRGN	C8
WANG_SMARCE1_TARGETS_UP	1.22016e-07	1.86887e-05	0.690132	-0.335498	-1.94912	259	PTGFRN, GABRA2, COL1A1, TAGLN, COL8A1, ACTA2, ATP10D, SOCS3, MYL9, FBLIM1, TBX18, COL3A1, C1S, COL6A3, MGP, DLX6, CCN4, SLC12A8, IGFBP6, IGFBP4, LPP, TGFBI, DCN, IQGAP2, JAG1, FN1, DAB2, SPOCD1, COL15A1, GJB2, TES, ATP8B1, NPR3, CD24, COL12A1, AKIRIN2, RBMS1, KRT18, MAN1C1, CFH, S1PR3, NID2, LRRFIP1, SULF1, CTHRC1, NUPR1, NEXN, SMIM14, MAP1B, MMP2, GHR, LUM, CADM1, TNFRSF19, RARRES1, PGM2L1, POST…	C2	CGP	Genes up-regulated in BT549 cells (breast cancer) by expression of SMARCE1 [GeneID=6605] off a retroviral vector.
GOBP_IMMUNE_EFFECTOR_PROCESS	1.30454e-07	1.98635e-05	0.690132	-0.283347	-1.75266	460	CD47, HLA-DQA1, HLA-DQB1, PIK3CG, EXOSC6, MFAP4, NDFIP1, CLEC2A, HLA-DRB5, PAK1, FCGR2B, APP, C1S, PPP3CB, CFB, HLA-DRB1, SERPING1, CCL19, ANXA1, RNF19B, MR1, GRN, VAMP8, CD180, FCGR1A, STAT6, PVR, JAG1, KARS1, C1R, ARRB2, IL10, HLA-DOB, NR4A3, FGL2, TUBB, MTOR, C2, HLA-DRA, VAV1, C7, TUSC2, CD300A, HCK, IL27RA, IL12RB1, CFD, CLU, ENTPD7, MICA, CFH, LAPTM5, TNFRSF1B, IL18, NCF1, NBN, TRAF2, CYRIB…	C5	GO:BP	Any process of the immune system that executes a component of an immune response. An effector immune process takes place after its activation. [GO_REF:0000022, GOC:add, ISBN:0781735149]
GSE45365_NK_CELL_VS_CD11B_DC_DN	1.37705e-07	2.0845e-05	0.690132	-0.375105	-2.07721	187	BYSL, CEBPB, RNF149, RNF19B, EIF4A1, TUBB6, GCNT2, SELE, IGF2BP2, CSF3, CD300LF, EIF5A, NIP7, BTG2, UAP1, TNFAIP2, S1PR3, MYO1F, GPSM3, SLC2A3, MEFV, DUSP1, SPI1, CYTH4, IER3, SYK, CCL4, PTPN6, CSF3R, STX11, SAA1, IL1RN, SLC3A2, NFKBIZ, MYO1G, TWIST2, SNTB2, CORO1A, JAK1, ADAM8, ARHGDIB, CSF2RB, FOSL2, CLEC7A, PADI4, MRTO4, CEMIP2, IER5, CD86, SLC20A1, TM4SF1, SH3BP2, TGM2, PTX3, GCH1, SLC15A3, C…	C7	IMMUNESIGDB	Genes down-regulated in NK cells versus ITGAM+ [GeneID=3684] dendritic cells.
SASSON_RESPONSE_TO_FORSKOLIN_DN	1.43384e-07	2.15784e-05	0.690132	-0.477652	-2.31174	85	ACTG2, ACTA2, TPM2, TP53I11, REXO5, ARL6IP5, THBS1, VCL, ADCY7, CAP2, STK24, DAB2, MAP2K3, DUSP14, CARD10, PI4K2A, KRT18, ACTB, GEM, GBP1, ACTR2, ACP5, NPC2, CASP4, ARHGAP35, ACTN1, GDI2, RGS4, ITGA3, PTPRE, DHRS3	C2	CGP	Genes down-regulated in primary granulosa cells in response to forskolin [PubChem=47936].
GOBP_LEUKOCYTE_MIGRATION	1.52172e-07	2.27687e-05	0.690132	-0.311796	-1.83963	300	PLVAP, CCL28, CD47, PIK3CG, MADCAM1, APP, PPIB, LYVE1, MCU, PPBP, LGMN, CCL19, THBS1, ANXA1, B4GALT1, CCN3, PIKFYVE, MIA3, CAMK1D, JAML, SELE, IL10, DPP4, VAV1, ECM1, GAS6, CD300A, HCK, STK10, IL27RA, NINJ1, C3AR1, VEGFA, AIF1, GPSM3, CCR5, DUSP1, CCL5, F11R, SPI1, RHOH, ROR2, APOD, PGF, SYK, NUP85, CCL4, PDGFD, GBF1, FOLR2, PTGER4, CSF3R, SAA1, CCL3, CSF1R, ITGAL, LGALS9, CXCL12, CD200R1, MSMP, …	C5	GO:BP	The movement of a leukocyte within or between different tissues and organs of the body. [GOC:add, ISBN:0781735149, PMID:14680625, PMID:14708592, PMID:7507411, PMID:8600538]
MODULE_52	1.53236e-07	2.2796e-05	0.690132	-0.296841	-1.78976	365	RPS26, IGF2, EIF4EBP1, FGFR1, DSP, CD151, GAS1, GOT1, EPCAM, TPM2, PCOLCE, SVIL, CDV3, CDK1, PDLIM4, QPCT, IGFBP4, THBS1, ANXA1, GRN, TGFBI, CITED2, CYB5A, EPB41L3, CAP2, FN1, PROCR, DAB2, MLLT11, IGFBP2, PTTG1, NNMT, IL32, CD24, DEPP1, CARD10, TMED3, NUP50, KRT18, LTBR, SEMA6C, LAMB1, SOX4, MYC, TPX2, E2F3, CCT6A, S100A4, COL4A1, CST7, H2BC12, VEGFA, LAPTM5, ANXA2, OGG1, M6PR, PRSS23, CASP2, LOX…	C4	CM	Cell line expressed genes.
FAN_OVARY_CL1_GPRC5A_TNFRS12A_HIGH_SELECTABLE_FOLLICLE_STROMAL_CELL	1.71103e-07	2.53085e-05	0.690132	-0.301752	-1.81849	364	PRNP, PEA15, COL1A1, MFAP4, SERPINF1, OGN, FGFR1, COL1A2, NXF1, KPNA2, APP, GLRX, RPL5, GSPT1, COL6A2, C1S, COL18A1, HSP90AB1, SERPING1, RNF149, TSPYL1, EIF3I, IMPDH2, EIF4A1, DCN, TUBB6, NAA50, C1R, MAP2K3, DUSP14, CACYBP, LHFPL6, UBE2N, HNRNPF, NUDT4, G3BP1, C7, BAG3, UBC, MYC, GSTM3, TUBA1C, UAP1, CCT6A, CFD, MARCHF5, CFH, PNRC2, GEM, ANKRD28, PPP2CA, TNFRSF1A, TOMM40, C11orf96, ACTG1, MAP1B, …	C8		Most stromal cells from selectable follicle C clustered in CL1 (Fig. 3a). Although stromal clusters (CL0, CL1) showed high expression of GNL3 and ARID5B (Fig. 8d), CL0 expressed high levels of XBP1 and SELK (Fig. 8e), both involved in endoplasmic reticulum (ER)-stress-induced apoptosis, whereas CL1 expressed high levels of GPRC5A and TNFRS12A (Fig. 8f).
GSE18281_CORTICAL_VS_MEDULLARY_THYMOCYTE_UP	1.74851e-07	2.57161e-05	0.690132	-0.375838	-2.06608	176	CD47, PTGFRN, SLPI, MRPL45, GLRX, PPIB, HM13, RNF19B, ISG20, GADD45B, C1R, GMPPB, TNFAIP2, VNN1, CEBPD, PPA1, RASA4, TNFRSF1B, CCL5, F11R, UBA7, JUN, SEC61G, HLA-B, S100A10, KLF6, SAA1, IL1RN, CCRL2, NPC2, CASP4, LY6E, HLA-E, C3, CD74, VNN2, PPP1R15A, IL4I1, PDIA6, PLK2, ADAR, ARHGEF3, GBP2, BCL3, LRRC59, CAPN5, IRF1, TGM2, CEACAM21, GCH1, IFITM3, PTGS2, CTSC, KRAS, EIF6, CD14, LAMB3, MANF, CASP1…	C7	IMMUNESIGDB	Genes up-regulated in thymocytes: cortical versus medullary sources.
GSE22935_WT_VS_MYD88_KO_MACROPHAGE_48H_MBOVIS_BCG_STIM_DN	1.95252e-07	2.85543e-05	0.690132	-0.369156	-2.04306	186	HLA-DQA1, LHFPL5, SLC6A20, SOCS3, EPCAM, WDR82, COL3A1, RAB8B, HM13, GPX1, HLA-DRB1, PSD3, ANXA1, ADCY7, ATP6V1H, HCST, TBC1D9, TNFAIP8, CERS6, CAMK1D, CLIC1, FRRS1, TES, PLK3, ARPC2, KCNN4, CCSAP, IL1RL2, CRIP1, NCF1, ANXA2, LRRC8C, CTHRC1, F11R, SKIL, GNG10, KLF6, ZNF217, STX11, LAT2, CD84, NPC2, MYO1G, BRK1, SEC24D, MAPK3, FSTL1, CCR1, HMOX1, SDCBP, CD48, HLA-DMB, IL1R1, CD86, RAB35, ACTR3, AL…	C7	IMMUNESIGDB	Genes down-regulated in macrophages 48h after M. bovis BCG infection: wildtype versus MYD88 [GeneID=4615] knockout.
GOBP_POSITIVE_REGULATION_OF_CELL_DIFFERENTIATION	1.99965e-07	2.90792e-05	0.690132	-0.247978	-1.5967	705	PAX8, AHI1, CTH, COL1A1, TRPV2, FRZB, SERPINF1, IMPACT, CREB1, FGFR1, NUDT21, PAFAH1B1, SOCS3, VHL, WNT3, CRABP2, CYP26B1, HOPX, KDR, FOXC1, HSP90AB1, CCN4, GDF10, HLA-DRB1, NRP1, CEBPB, CCL19, ANXA1, OPRM1, NTN1, MEDAG, PLXNC1, PDLIM7, TGFB1I1, GCNT2, SPINT1, GDF7, JAG1, FN1, IGFBP3, DAB2, CLIC1, ARRB2, SMAP1, CSF3, FBXO5, IL10, ALOX15B, BMP4, PDPN, ARPC2, CD24, MTOR, HLA-DRA, BTG1, HTR2A, IL1RL…	C5	GO:BP	Any process that activates or increases the frequency, rate or extent of cell differentiation. [GOC:go_curators]
GOBP_RESPONSE_TO_NITROGEN_COMPOUND	2.15033e-07	3.10957e-05	0.690132	-0.233563	-1.53293	918	NSMCE3, PRNP, PEA15, COL1A1, EPM2AIP1, PIK3CG, STAT4, AP3S1, CDO1, SERPINF1, IMPACT, CYP1B1, CREB1, IGF2, EIF2B3, ADSS2, P2RX5, COL1A2, SOCS3, UBE4A, FOXC2, GABRB2, FAM8A1, GOT1, KLF2, FCGR2B, APP, RYR3, ASS1, HTR7, PCSK1, POMC, ROCK2, CASQ2, COL3A1, HSP90AB1, CDK1, RAB8B, HM13, SLC22A6, GPX1, LGMN, MAN1B1, BRIP1, HPCA, TXN, ADIPOR1, CEBPB, CCL19, ANXA1, ANO1, SESN1, APEX1, OPRM1, ATP2B4, GNA15, …	C5	GO:BP	Any process that results in a change in state or activity of a cell or an organism (in terms of movement, secretion, enzyme production, gene expression, etc.) as a result of a nitrogen compound stimulus. [GOC:pr, GOC:TermGenie]
REACTOME_NEUTROPHIL_DEGRANULATION	2.18588e-07	3.14342e-05	0.690132	-0.287758	-1.76534	427	NAPRT, CD47, CAND1, SLPI, ATP6V1D, DSP, CTSB, HSP90AB1, PSMD13, RAB3A, PPBP, STBD1, CHIT1, QPCT, RAB3D, GRN, VAMP8, IMPDH2, AGPAT2, B4GALT1, VCL, IQGAP2, PSMD1, CTSA, GNS, PLAU, CNN2, FGL2, TUBB, CD300A, SERPINA3, VAT1, ALDOA, RAB6A, STK10, RETN, LTA4H, CFD, C3AR1, VNN1, VCP, TNFRSF1B, ANXA2, SLC2A3, SCAMP1, DOCK2, CD68, ACTR2, S100A11, DIAPH1, RAP2B, HLA-B, STING1, PTPRC, ITGAM, BIN2, CD53, HRNR…	C2	CP:REACTOME	Neutrophil degranulation
GSE10325_LUPUS_CD4_TCELL_VS_LUPUS_MYELOID_DN	2.26931e-07	3.24537e-05	0.690132	-0.370747	-2.05712	188	PEA15, CYP1B1, EIF4EBP1, CHST15, MARCO, CTSB, GPX1, QPCT, CEBPB, GRN, BID, TGFBI, SECTM1, EPB41L3, CTSA, IFI30, FGL2, APOBR, HCK, TNFAIP2, CFD, LST1, AIF1, CEBPD, ATP6V1B2, RHBDF2, TBXAS1, APLP2, STAB1, SYK, FCGR2A, DMXL2, CSF3R, TYROBP, NAGK, CSF1R, IL1RN, BLVRB, PLCG2, LAT2, CD74, TBC1D8, RNPEP, BASP1, TPD52L2, ADAP2, CCR1, S100A12, HEXB, PRKCD, HMOX1, SDCBP, IRF8, CSF2RB, CLEC7A, KCTD12, CD86,…	C7	IMMUNESIGDB	Genes down-regulated in comparison of systemic lupus erythematosus CD4 [GeneID=920] T cells versus systemic lupus erythematosus myeloid cells.
COLINA_TARGETS_OF_4EBP1_AND_4EBP2	2.45516e-07	3.49185e-05	0.674963	-0.313931	-1.85758	308	PAX8, MRPL37, BICC1, PWP2, PARP12, GALM, LTBP2, CENPH, CDO1, IMPACT, CNMD, ATP10D, FOXC2, POLE, OSR1, ITIH2, KIF2C, C1S, MMACHC, FOXC1, TIMM10, ADAMTS1, THBS1, GRN, ISLR, SESN1, BID, SHISA5, ORMDL1, RCC2, UBE2T, SLC29A1, C1R, IGFBP2, NNMT, FBXO5, PDPN, NPR3, NUSAP1, TPX2, ABCC4, CD302, PNRC2, CCL5, TRIM5, MFSD1, HLA-B, TACC3, THBD, PGM1, IL1RN, LGALS9, BLVRB, LXN, LY6E, HLA-E, FOXD1, C3, AIG1, LP…	C2	CGP	Genes up-regulated in MEF cells (embryonic fibroblast) with double knockout of the translation repressors 4EBP1 [GeneID=1978] and 4EBP2 [GeneID=1979].
GOBP_ANATOMICAL_STRUCTURE_FORMATION_INVOLVED_IN_MORPHOGENESIS	2.50228e-07	3.53943e-05	0.674963	-0.232997	-1.53181	922	PAX8, AHI1, ZNF304, PTGFRN, COL1A1, PIK3CG, SERPINF1, CYP1B1, CNMD, ITGA5, COL8A1, SPHK1, PAFAH1B1, FOXC2, MYH11, BYSL, KLF2, LIAS, WNT3, ALDH1A2, MYL9, HOPX, PDCD6, OSR1, ROCK2, PHLDB2, FZD2, TBX18, DLX5, KDR, ADAMTS15, FOXC1, COL18A1, PRKAR1A, PPP3CB, DLX6, ADAMTS1, GPX1, NRP1, THBS1, ANXA1, SPINK2, GRN, PFN1, NPHP3, B4GALT1, TBPL1, SLC25A46, AKAP13, ATP2B4, TGFBI, DCN, PTK7, CITED2, TTLL1, VTN…	C5	GO:BP	The developmental process pertaining to the initial formation of an anatomical structure from unspecified parts. This process begins with the specific processes that contribute to the appearance of the discrete structure and ends when the structural rudiment is recognizable. An anatomical structure is any biological entity that occupies space and is distinguished from its surroundings. Anatomical…
WONG_ADULT_TISSUE_STEM_MODULE	2.72986e-07	3.84036e-05	0.674963	-0.255159	-1.63001	646	COL1A1, LTBP2, STAT4, SERPINF1, IMPACT, CYP1B1, CMTM8, TAGLN, IRF6, SOCS3, TSPAN4, FKBP9, RAB11FIP5, KLF2, SCG5, APP, MYL9, PHLDB2, FZD2, CASQ2, STMN3, FOXC1, COL18A1, ELOVL6, FBLN2, TP53I11, ADAMTS1, AOC3, LILRB5, STBD1, TXN, CEBPB, THBS1, LPP, SESN1, MEDAG, RGS18, LAMC1, CITED2, SIRT3, CD209, TUBB6, PLEK, ADARB1, FN1, IGFBP3, PROCR, DAB2, C1R, CAVIN3, PAQR7, LHFPL6, KDELR3, NSG2, TES, CNN2, APO…	C2	CGP	The 'adult tissue stem' module: genes coordinately up-regulated in a compendium of adult tissue stem cells.
MODULE_15	2.88042e-07	4.03026e-05	0.674963	-0.30989	-1.84299	321	CD47, HLA-DQA1, HLA-DQB1, EIF4EBP1, BYSL, GLRX, HTR7, HOPX, PCOLCE, SF3A1, CDV3, ARL6IP5, ANXA1, SPINK2, APEX1, SLC25A46, GNA15, IQGAP2, PLEK, TNFAIP8, MAP2K3, MLLT11, PTTG1, PLK3, KRT18, SOX4, MYC, LMO4, CCT6A, S100A4, CST7, RGS10, H2BC12, LST1, AIF1, CRIP1, LAPTM5, M6PR, MBNL1, GPSM3, TBXAS1, PTPN9, TRAF2, LCP1, DOCK2, PRKDC, JUN, PTPRC, CD53, ADSL, MRPL3, CSF3R, PLAAT4, HAP1, LGALS9, PLCG2, RG…	C4	CM	Genes in the cancer module 14.
POOLA_INVASIVE_BREAST_CANCER_UP	2.97465e-07	4.13973e-05	0.674963	-0.353516	-2.00437	220	AHI1, HLA-DQA1, STAT4, GNLY, PRUNE2, CEMIP, HOPX, KIF2C, COL6A3, CDK1, CCN4, CHIT1, HLA-DRB1, CD6, ISG20, FCGR1A, ADCY7, PLEK, FN1, IFI30, PTTG1, KDELR3, IL32, ARHGAP15, ECM1, SLA, FYB1, NUSAP1, TPX2, CST7, ABCC4, LST1, AIF1, LAPTM5, NID2, IL18, MAN1A1, SULF1, GBP1, DOCK2, CD27, ARHGAP25, PTPRC, CCL4, CD53, FCGR2A, MNDA, TRAF3IP3, CCL3, LGALS9, IL18R1, LAT2, GLIPR1, RHOF, SAMSN1, CD74, LCP2, MMP1…	C2	CGP	Genes up-regulated in atypical ductal hyperplastic tissues from patients with (ADHC) breast cancer vs those without the cancer (ADH).
GOBP_REGULATION_OF_IMMUNE_RESPONSE	3.01197e-07	4.16925e-05	0.674963	-0.256771	-1.63982	635	CD47, GPS2, TAPBPL, PRNP, SLC39A10, HLA-DQB1, LILRA4, ARG2, EXOSC6, TLR10, MFAP4, COCH, NDFIP1, EIF2B3, PAK1, FCGR2B, MFHAS1, COL3A1, C1S, HSP90AB1, PPP3CB, CFB, GPX1, HLA-DRB1, SERPING1, POLR3B, CCL19, ANXA1, MR1, GRN, VAMP8, TNFRSF21, FLOT2, FCGR1A, ADCY7, STAT6, PVR, HCST, CNR1, KARS1, C1R, ARRB2, IL10, NR4A3, UBE2N, FGL2, CD300LF, CD24, C2, HLA-DRA, AKIRIN2, VAV1, ECM1, KCNN4, FYB1, C7, CD300…	C5	GO:BP	Any process that modulates the frequency, rate or extent of the immune response, the immunological reaction of an organism to an immunogenic stimulus. [GOC:ai]
GOBP_REGULATION_OF_T_CELL_ACTIVATION	3.09728e-07	4.26452e-05	0.674963	-0.32439	-1.89276	270	CD47, PRNP, HLA-DQA1, HLA-DQB1, ARG2, NDFIP1, IGF2, NCK2, TNFSF8, HLA-DRB5, FCGR2B, CYP26B1, PRKAR1A, HLA-DRB1, CEBPB, CCL19, ANXA1, CD6, TNFRSF21, FLOT2, CD209, IGFBP2, IL10, HLA-DOB, BMP4, FGL2, CD24, DPP4, HLA-DRA, VAV1, IL1RL2, CD300A, SOX4, RUNX1, EFNB3, IL27RA, IL12RB1, VNN1, AIF1, LAPTM5, TNFRSF1B, IL18, CYRIB, CCL5, RPS3, RHOH, CD27, SYK, PTPRC, SOD1, PTPN6, HLA-A, LGALS9, HFE, TNFSF18, C…	C5	GO:BP	Any process that modulates the frequency, rate or extent of T cell activation. [GOC:ai]
HARALAMBIEVA_PBMC_M_M_R_II_AGE_11_22YO_VACCINATED_VS_UNVACCINATED_7YR_UP	3.2248e-07	4.41661e-05	0.674963	-0.239701	-1.55409	785	PAX8, PLVAP, BATF3, SSTR3, LILRA4, PARP12, KCNN1, TLNRD1, ZNF366, BRSK1, SLC24A3, PRUNE2, DOP1A, DSP, ACTA2, FAR2, SPHK1, CEMIP, SIGLEC1, CYP1A1, ADPRS, RHEBL1, ADAMTS2, GRHL1, TMEM268, TSPAN13, C1S, FOXC1, CFB, CDK1, FXYD6, STBD1, BRIP1, SERPING1, IGFBP4, CCL19, RNF19B, NTN1, ISG20, B4GALT5, OTOF, SECTM1, GCNT2, OSBPL6, CHAC1, JAG1, C1QTNF1, IGFBP3, PROCR, C1R, CAVIN3, FRRS1, LHFPL6, IGF2BP2, PN…	C7	VAX	Genes up-regulated in peripheral blood mononuclear cell vaccinated vs unvaccinated in adolescent/young adults (11-22) after exposure to M-M-R II , time point 7Y
GOBP_LEUKOCYTE_MEDIATED_IMMUNITY	3.28661e-07	4.47757e-05	0.674963	-0.307469	-1.81158	294	HLA-DQA1, HLA-DQB1, PIK3CG, EXOSC6, NDFIP1, CLEC2A, HLA-DRB5, FCGR2B, C1S, PPP3CB, HLA-DRB1, SERPING1, RNF19B, MR1, VAMP8, FCGR1A, STAT6, PVR, JAG1, C1R, ARRB2, IL10, HLA-DOB, NR4A3, TUBB, C2, HLA-DRA, VAV1, C7, TUSC2, CD300A, IL27RA, IL12RB1, CLU, MICA, TNFRSF1B, IL18, NBN, TRAF2, CYRIB, PRAM1, SPI1, AP1G1, ARL8B, RNF8, C1RL, RFTN1, CD27, SYK, HLA-B, PTPRC, ITGAM, STXBP2, PTPN6, TYROBP, TUBB4B, …	C5	GO:BP	Any process involved in the carrying out of an immune response by a leukocyte. [GO_REF:0000022, GOC:add, ISBN:0781735149]
PATEL_SKIN_OF_BODY_ZOSTAVAX_AGE_70_93YO_VZV_CHALLENGE_6HR_UP	3.40994e-07	4.62127e-05	0.674963	-0.325891	-1.89999	266	BATF3, PHACTR2, SOCS3, CHST15, THBS1, MEDAG, B4GALT5, SECTM1, PLEK, CDC42EP3, DAB2, SELE, NNMT, COL15A1, NR4A3, PDPN, FGL2, DHX33, SV2B, SERPINA3, RRN3, FAM20A, UAP1, TNFAIP2, RAB3IL1, C3AR1, PPTC7, SLC2A3, SULF1, GBP1, ANKRD28, TNFRSF1A, DERL1, PTPRC, IFNGR2, MYO1B, IRGQ, FCGR2A, PTGER4, ZNF217, NABP1, CCN1, SAMSN1, NRIP3, SEC24D, ZNF436, BASP1, ATP2B1, ATP13A3, CCR1, HAPLN3, SDCBP, YWHAG, IL1RL…	C7	VAX	Genes up-regulated in skin of body 6hr vs 0hr in adults (70-93) (VZV challenge) after exposure to Zostavax , time point 6H
LEIN_OLIGODENDROCYTE_MARKERS	3.47157e-07	4.68029e-05	0.674963	0.526665	2.3221	74	NDRG1, TMEM88B, NRBP2, TMEM63A, QDPR, SEPTIN4, FRMD4B, DAAM2, ABCA2, GLTP, SCD, MBP, PLEKHB1, MOBP, CRYAB, PLEKHG3, CSRP1, SGK1, ANLN, CERS2, S1PR5, QKI, ERMN, OMG, CCP110, PEX2, CNP, CA2, AATK, FA2H, MAL, TPPP3, GPR37, GATM, SERPINB1, MOG, SLC44A1	C2	CGP	Genes enriched in oligodendrocytes in the adult mouse brain identified through correlation-based searches seeded with the oligodendrocyte cell-type specific gene expression patterns.
GSE29618_BCELL_VS_MDC_DN	3.522e-07	4.72368e-05	0.674963	-0.366226	-2.02804	187	BATF3, PEA15, NDFIP1, PAK1, GLRX, CTSB, PRKAR1A, TXN, GRN, PFN1, EIF4A1, TGFBI, DAB2, IFI30, ARPC2, APOBR, HLA-DRA, FYB1, GNAI2, NIBAN1, TUBA1C, CCT6A, S100A4, RGS10, TMSB10, CEBPD, IL18, ANXA2, ACTB, SEC13, CCR5, F11R, LCP1, ARPC1B, ACTG1, RAP2B, S100A10, CSF3R, RAB11FIP1, SPINT2, IL18R1, RGS1, GLIPR1, MYL6, PKM, FLT3, MYL12A, CORO1A, CASP1, ADAM8, GBE1, KCTD12, COTL1, APAF1, CSTB, MACROH2A1, PT…	C7	IMMUNESIGDB	Genes down-regulated in comparison of B cells versus myeloid dendritic cells (mDC).
CUI_DEVELOPING_HEART_C6_EPICARDIAL_CELL	3.72212e-07	4.96634e-05	0.674963	-0.380267	-2.08434	171	BICC1, SLPI, SCG5, ASS1, IQCA1, ALDH1A2, UPK1B, C1S, KDR, INMT, CFB, SERPING1, AOX1, MEDAG, VTN, CHAC1, PROCR, C1R, NNMT, PDPN, PTGIS, KRT18, GSTM3, PCOLCE2, HSBP1L1, CRIP1, CFH, IL18, NMU, SULF1, PRSS23, NUPR1, TNFRSF1A, TGM1, S100A10, KLF6, SMOC2, PLAAT4, MSLN, LY6E, NFKBIZ, C3, RARRES1, CARD16, ITGA3, KRT19, MAL2, ZFP36L1, TMEM176B, IL1R1, SBSPON, TM4SF1, SMTNL2, CCDC80, PTGS1, RARRES2, SEMA3C…	C8
GSE22140_GERMFREE_VS_SPF_MOUSE_CD4_TCELL_UP	3.78532e-07	5.02477e-05	0.674963	-0.372122	-2.05634	184	CD47, CRLF1, COX6B1, SOCS3, CIITA, BMP3, FZD2, C1S, SERPING1, RNF19B, NAA80, ISG20, B4GALT5, FCGR1A, SECTM1, PLEK, TBKBP1, GADD45B, MRC1, CLIC1, APOBEC3F, PSMB3, FYB1, DEFB1, HCK, LMO4, OASL, TNFAIP2, GEM, SP100, GBP1, ERLIN1, TNFRSF1A, WDR7, KLF6, PCK2, POLG, PLAAT4, CUL1, CCRL2, CASP4, BATF, FLOT1, LCP2, IFITM1, GDI2, CDKN1A, PDGFB, UBE2L6, IRF8, P2RX4, CSF2RB, PTPRR, NCOA1, GBP2, BCL3, TRIM25,…	C7	IMMUNESIGDB	Genes up-regulated in healthy CD4 [GeneID=920] T cells: germ free versus specific pathogen free.
GSE22886_DAY0_VS_DAY1_MONOCYTE_IN_CULTURE_DN	3.96324e-07	5.2341e-05	0.674963	-0.37376	-2.06112	179	ATP6V1D, CTSV, STAT4, CYP1B1, SPHK1, ANKLE2, CTSB, PPBP, TXN, GNA15, TUBB6, ATP6V1H, DAB2, MRC1, GMPPB, TUBB, PPME1, KCNN4, PI4K2A, MAPK13, PHACTR1, GARS1, RUNX1, NINJ1, H2BC12, ARL1, TNFRSF1B, SLC2A3, ARL8B, IER3, RFTN1, SEC61G, CCL4, NME7, TUBB4B, IL1RN, CCRL2, SLC3A2, LAPTM4B, SOD2, RHOF, NRIP3, C3, BASP1, MMP19, ATP13A3, CDKN1A, MT1H, WNT5A, PSMA6, CSTB, PSMC4, SH3GL1, NQO1, ABCC1, ATP1B3, PT…	C7	IMMUNESIGDB	Genes down-regulated in comparison of monocytes cultured for 0 days versus those cultured for 1 day.
GOCC_VACUOLE	4.33958e-07	5.70204e-05	0.674963	-0.245422	-1.5835	727	NAPRT, CCDC115, HLA-DQA1, VPS33B, ULK1, HLA-DQB1, FMOD, NAPG, ATP6V1D, CTSV, GNLY, HYAL3, FLCN, OGN, HLA-DRB5, ASS1, TMEM150C, MFHAS1, CTSB, ARSK, ABCA5, HSP90AB1, MYO7A, RAB3A, CHIT1, LGMN, HLA-DRB1, SYT7, RNF19B, RAB3D, GRN, VAMP8, B4GALT1, DCN, YWHAB, ANXA11, ATP6V1H, VPS39, PSMD1, DAB2, CTSA, IFI30, GNS, CSF3, NSG2, HLA-DOB, CTSK, TUBB, MTOR, DPP4, HLA-DRA, PI4K2A, SERPINA3, HCK, VAT1, DNASE2…	C5	GO:CC	A closed structure, found only in eukaryotic cells, that is completely surrounded by unit membrane and contains liquid material. Cells contain one or several vacuoles, that may have different functions from each other. Vacuoles have a diverse array of functions. They can act as a storage organelle for nutrients or waste products, as a degradative compartment, as a cost-effective way of increasing…
GOBP_POSITIVE_REGULATION_OF_CELL_ACTIVATION	4.39151e-07	5.74113e-05	0.674963	-0.30527	-1.79863	294	CD47, HLA-DQA1, SLC39A10, HLA-DQB1, EXOSC6, IGF2, NCK2, ACTA2, HLA-DRB5, HLA-DRB1, CCL19, THBS1, ANXA1, VAMP8, CD6, FLOT2, CD209, STAT6, PLEK, KARS1, IGFBP2, IL10, HLA-DOB, NR4A3, CD24, DPP4, HLA-DRA, VAV1, IL1RL2, GAS6, SOX4, TLR6, RUNX1, EFNB3, IL27RA, IL12RB1, VNN1, AIF1, IL18, CYRIB, CCL5, RPS3, AP1G1, PRKDC, RHOH, CD27, SYK, PTPRC, ITGAM, PTPN6, TYROBP, CCL3, HLA-A, LGALS9, CCDC88B, NFKBIZ, …	C5	GO:BP	Any process that activates or increases the frequency, rate or extent of activation. [GOC:ai]
AIZARANI_LIVER_C25_KUPFFER_CELLS_4	4.43936e-07	5.74961e-05	0.674963	-0.378189	-2.05585	161	HLA-DQA1, HLA-DQB1, HLA-DRB5, CIITA, GPX1, HLA-DRB1, THBS1, ANXA1, GRN, TGFBI, PLEK, JAML, ARRB2, PLD4, NR4A3, FGL2, HLA-DRA, HCK, PHACTR1, LST1, TMSB10, VEGFA, AIF1, LAPTM5, ATP6V1B2, TNFRSF1B, ACTB, LRRFIP1, GPAT3, IER3, S100A11, SYK, POU2F2, THBD, FCGR2A, MNDA, TYROBP, CSF1R, IL1RN, LGALS9, RNASET2, RGS1, NPC2, RNF144B, SAMSN1, ADA2, BASP1, FLT3, ATP2B1, HERPUD1, PPT1, PTPRE, METRNL, IRF8, HLA…	C8
CUI_DEVELOPING_HEART_C7_MAST_CELL	4.44243e-07	5.74961e-05	0.674963	-0.400347	-2.10478	132	MLPH, ANXA1, VAMP8, PLEK, CLIC1, ARHGAP15, BTG2, S100A4, LAPTM5, SLC2A3, LCP1, RHOH, STING1, ITGAM, BIN2, CD53, STXBP2, TYROBP, NABP1, UNC13D, RGS1, LAT2, CD84, BATF, NFKBIZ, CD37, SAMSN1, PPP1R15A, SDCBP, ADAM8, ARHGDIB, XBP1, IL1RL1, PAG1, CSF2RB, HK2, TMEM176B, HCLS1, IFITM2, FCER1G, EMP3, ALOX5, GMFG, PTGS1, ALOX5AP, HSPA1A, SERP1, LYST, ADRB2, EIF5, SERTAD1, CTSD, CD83, SRGN, CALB2, LIF, RAC…	C8
REACTOME_EXTRACELLULAR_MATRIX_ORGANIZATION	4.54415e-07	5.85201e-05	0.674963	-0.32376	-1.86389	249	CD47, COL1A1, FMOD, CTSV, LTBP2, MADCAM1, MFAP4, FBLN5, ITGA5, COL14A1, COL8A1, CD151, COL1A2, MATN3, APP, ADAMTS2, COL6A2, PPIB, PCOLCE, CTSB, COL3A1, KDR, COL6A3, COL18A1, FBLN2, NTN4, ADAMTS1, THBS1, LAMC2, DCN, LAMC1, VTN, ELN, FN1, COL15A1, CTSK, BMP4, COL12A1, COLGALT1, LAMB1, PCOLCE2, COL4A2, COL4A1, NID2, LAMA2, F11R, LOX, FBLN1, HSPG2, ITGAM, MMP2, LAMC3, COL8A2, COL13A1, ITGAL, LUM, ICA…	C2	CP:REACTOME	Extracellular matrix organization
GSE22886_NAIVE_CD4_TCELL_VS_MONOCYTE_DN	4.74314e-07	6.07803e-05	0.674963	-0.353196	-1.96618	192	ATP10D, CHST15, GLRX, CTSB, GPX1, QPCT, GRN, BID, PLXNC1, CDC42EP3, PGD, CTSA, IFI30, OAZ1, GNS, FGL2, HCK, E2F3, SCPEP1, TNFAIP2, CEBPD, MED8, ANXA2, SPI1, TIMM8B, NSF, S100A11, NADK, MFSD1, GNG10, SYK, KCNMB1, ITGAM, IFNGR2, FCGR2A, ATP6V1A, MNDA, DMXL2, CSF3R, NAGK, PLCG2, LAT2, NPC2, VNN2, ADAP2, CCR1, S100A12, HEXB, PRKCD, PTPRE, CASP1, SDCBP, IRF8, CSF2RB, CLEC7A, KCTD12, EIF4E2, CTBP2, FCE…	C7	IMMUNESIGDB	Genes down-regulated in comparison of naive CD4 [GeneID=920] T cells versus day 0 monocytes.
DURANTE_ADULT_OLFACTORY_NEUROEPITHELIUM_MACROPHAGES	4.80444e-07	6.12625e-05	0.659444	-0.490043	-2.31428	74	HLA-DQA1, HLA-DQB1, HLA-DRB5, HLA-DRB1, GRN, MS4A6A, IFI30, PLD4, FGL2, HLA-DRA, PHACTR1, RGS10, C3AR1, LST1, AIF1, CEBPD, LAPTM5, DUSP1, SPI1, CD68, FCGR2A, MNDA, TYROBP, CCL3, CSF1R, RNASET2, RGS1, NPC2, YWHAH, C3, CD74, HERPUD1, HLA-DMB, CLEC7A, COTL1, FCER1G, C1QA, C1QC, CCL4L2, CD14, C1QB, CXCR4, GPR183, CD83, SRGN, TREM2, RNASE6, LY86, RGS2	C8
MODULE_118	4.88488e-07	6.19829e-05	0.659444	-0.302328	-1.80743	337	HLA-DQA1, CRABP1, CYP1B1, IGF2, EIF4EBP1, FGFR1, DSP, CD151, GAS1, CHST15, EPCAM, TPM2, CDK1, PDLIM4, QPCT, IGFBP4, THBS1, ANXA1, GRN, EPB41L3, FN1, MLLT11, IGFBP2, PTTG1, NNMT, PLAU, CD24, CARD10, KCNN4, SLA, KRT18, HCK, LAMB1, SOX4, MYC, TPX2, S100A4, COL4A1, CST7, RGS10, H2BC12, AIF1, LAPTM5, M6PR, GPSM3, PRSS23, CCL5, LCP1, DOCK2, CASP2, LOX, HSPG2, IER3, S100A11, PTPRC, CCL4, TPM1, CD53, MND…	C4	CM	cell line expressed genes.
REACTOME_ADAPTIVE_IMMUNE_SYSTEM	5.05782e-07	6.38642e-05	0.659444	-0.252717	-1.61599	655	ORAI1, HLA-DQA1, HLA-DQB1, COL1A1, PSMD4, LILRA4, CTSV, MADCAM1, COL1A2, HLA-DRB5, SOCS3, UBE4A, PAK1, SIGLEC1, HERC3, FCGR2B, THEM4, VHL, FBXO41, DCAF1, PSMA7, LMO7, CTSB, COL3A1, KIF2C, CAPZB, PPP3CB, UBE2V1, FBXO21, PSMD13, LILRB5, LGMN, HLA-DRB1, RNF19B, VAMP8, FCGR1A, FBXO10, CD209, TUBB6, YWHAB, TRIM9, PVR, HCST, PSMD1, CTSA, MRC1, IFI30, HERC2, JAML, ANAPC7, PIK3CB, MAP3K14, HLA-DOB, CTSK,…	C2	CP:REACTOME	Adaptive Immune System
GSE24634_TREG_VS_TCONV_POST_DAY10_IL4_CONVERSION_DN	5.15166e-07	6.47334e-05	0.659444	-0.365257	-2.02666	188	CYP1B1, TSPAN4, FKBP9, CHST15, CRABP2, FZD2, CTSB, C1S, GPX1, NRP1, CEBPB, GRN, LAMC1, TUBB6, AQP9, CTSA, MRC1, IFI30, PLAU, FGL2, C2, HLA-DRA, MAP2K6, HCK, VAT1, TCN2, SCPEP1, H2BC12, APLP2, GFOD1, SYK, ITGAM, FCGR2A, MNDA, ADORA3, TYROBP, CSF1R, BLVRB, NPC2, LPAR6, CCR1, CDKN1A, HMOX1, HLA-DMB, CLEC7A, TFPI, TMEM176B, CD86, CTBP2, AK5, SLC20A1, FCGRT, AHCY, LPL, C1QA, TMEM51, MYOF, SLC15A3, LHF…	C7	IMMUNESIGDB	Genes down-regulated in comparison of CD25+ regulatory T cell (Treg) treated with IL4 [GeneID=3565] at day 10 versus CD25- T cells treated with IL4 [GeneID=3565] at 10 h.
BUSSLINGER_DUODENAL_IMMUNE_CELLS	5.22577e-07	6.53473e-05	0.659444	-0.235147	-1.53405	839	PHF1, CD47, STX16, SSBP4, STAT4, PLEKHA2, GNLY, DEF6, SLC38A1, ABI3, NXF1, WDR82, RPL5, DDX6, HOPX, TPM4, CAPZB, PRKAR1A, CDV3, RAB8B, ARL6IP5, RNF149, ANXA1, CNPY3, PFN1, CD6, AKAP13, ATP2B4, FLOT2, SHISA5, CITED2, ADCY7, YWHAB, PLEK, TAGAP, CDC42EP3, HCST, RBM26, SSH1, CLIC1, JAML, OAZ1, ARRB2, IL32, UGP2, SYTL3, TES, APOBEC3C, APOBEC3G, CNN2, RPL23, ARPC2, TUBB, APOBR, SRSF7, DENND1C, VAV1, BT…	C8
GSE22886_NAIVE_BCELL_VS_MONOCYTE_DN	5.32603e-07	6.62809e-05	0.659444	-0.35753	-1.99366	196	CHST15, GLRX, CTSB, SVIL, GPX1, QPCT, CEBPB, ANXA1, GRN, BID, IQGAP2, CDC42EP3, PGD, CERS6, IFI30, ARRB2, GNS, CD300A, HCK, ALDOA, CCT6A, S100A4, TNFAIP2, TNFRSF1B, MYO1F, ANXA2, TIMM8B, TNFRSF1A, S100A11, ITGAM, STXBP2, S100A10, LRPAP1, FCGR2A, ATP6V1A, MNDA, TYROBP, NAGK, ITGAL, MOGS, PKM, PPT1, S100A12, IGF2R, HEXB, PRKCD, PTPRE, CASP1, SDCBP, CSNK1A1, CSF2RB, CLEC7A, BCL3, KCTD12, CTBP2, SLC1…	C7	IMMUNESIGDB	Genes down-regulated in comparison of naive B cells versus day 0 monocytes.
CROONQUIST_STROMAL_STIMULATION_UP	5.40207e-07	6.69055e-05	0.659444	-0.572195	-2.46814	49	ACTA2, COL1A2, TPM2, COL6A3, IGFBP4, TGFBI, IGFBP3, NNMT, SULF1, DUSP1, NUPR1, LOX, IER3, CCL4, CCL3, LUM, BASP1, PPP1R15A, SLC25A4, CCN2, H2AC18, NOTCH3, TGM2, MYOF, LAMA4, IER2, SERPINE1, FOS, GUCY1A2, RGS2, IGFBP7, SPARC, CXCL2, MICAL2, IL6	C2	CGP	Genes up-regulated in ANBL-6 cell line (multiple myeloma, MM) co-cultured with bone marrow stromal cells compared to those grown in the presence of IL6 [GeneID=3569].
VERHAAK_AML_WITH_NPM1_MUTATED_UP	5.47229e-07	6.74525e-05	0.659444	-0.382303	-2.05799	153	CYP1B1, CHST15, FOXC1, AKR1C1, CFB, PPBP, THBS1, SPINK2, SECTM1, PLEK, EPB41L3, JAG1, AQP9, IFI30, GNS, FGL2, DEFB1, HCK, SCPEP1, RUNX1, TNFAIP2, CD300C, ABCC4, CLU, NINJ1, C3AR1, VNN1, NCF1, TBXAS1, IER3, CCL4, PDGFD, FCGR2A, MMP2, DMXL2, CCL3, ADGRE1, LAPTM4B, SOD2, BASP1, VNN2, DPEP2, CCR1, LTBP1, ABHD2, IGF2R, PRKCD, CASP1, HMOX1, H2BC4, PLS1, TMEM176B, CD86, SLC16A3, H2AC18, C1QA, ITGB3, PTX…	C2	CGP	Genes up-regulated in acute myeloid leukemia (AML) patients with mutated NPM1 [GeneID=4869].
DESCARTES_FETAL_KIDNEY_MYELOID_CELLS	5.51985e-07	6.77163e-05	0.659444	-0.390845	-2.08555	143	HLA-DQB1, TLR10, HLA-DRB5, CIITA, SIGLEC1, MARCO, CTSB, MYO7A, LILRB5, FCGR1A, CD209, MS4A6A, AQP9, IFI30, IL10, CD300LF, SIRPB2, HCK, FAM20A, RETN, C3AR1, VNN1, AIF1, NCF1, RHBDF2, CCR5, MEFV, CD163L1, SPI1, CYTH4, FGD2, CD68, IER3, LRRC25, FOLR2, MNDA, CSF1R, CD200R1, MSLN, TNFSF18, ADAP2, CCR1, HMOX1, HLA-DMB, MS4A14, LRRK1, CLEC7A, CD86, C1QA, C1QC, HRH1, SLC15A3, PTGS2, HAVCR2, C1QB, LILRB4,…	C8		descartes DE_gene_by_organ.csv, fold.change>5, qval<0.05, pval<0.05
HELLER_HDAC_TARGETS_DN	5.74627e-07	7.00377e-05	0.659444	-0.32534	-1.89393	265	CTH, TAPBPL, PHACTR2, SLC47A1, LSAMP, SLC38A1, SLC19A1, P2RX5, CHST15, ELOVL6, CCN4, QPCT, CEBPB, CD180, ISG20, ATIC, ADCY7, IQGAP2, SUMO3, CHAC1, TTC39A, APOBEC3G, KIAA1549L, SRSF7, HLA-DRA, EIF5A, SLA, BAG3, MAPK13, BLNK, MYC, LAPTM5, NMU, SULF1, LIMD2, GUCY1A1, NFE2L1, S100A11, RHOH, PDIA4, PTPRC, FAS, MRPL3, SLC33A1, ST6GAL1, TRAF3IP3, CUL1, SLC3A2, CADM1, SEC24D, ST7, PPP1R15A, HERPUD1, CCR1…	C2	CGP	Genes down-regulated in at least one of three multiple myeloma (MM) cell lines by TSA [PubChem=5562].
GOBP_T_CELL_ACTIVATION	5.7632e-07	7.00377e-05	0.659444	-0.287118	-1.75408	405	CD47, PRNP, HLA-DQA1, HLA-DQB1, PIK3CG, ARG2, NDFIP1, IGF2, NCK2, TNFSF8, CD151, HLA-DRB5, FCGR2B, CYP26B1, PRKAR1A, PPP3CB, HLA-DRB1, CEBPB, CCL19, ANXA1, MR1, CD6, TNFRSF21, FLOT2, CD209, STAT6, LEPR, IGFBP2, JAML, IL10, HLA-DOB, BMP4, FGL2, CD24, MTOR, DPP4, HLA-DRA, VAV1, IL1RL2, CD300A, CCR9, SOX4, RUNX1, EFNB3, IL27RA, IL12RB1, ENTPD7, VNN1, AIF1, MICA, LAPTM5, TNFRSF1B, IL18, CYRIB, CCL5, …	C5	GO:BP	The change in morphology and behavior of a mature or immature T cell resulting from exposure to a mitogen, cytokine, chemokine, cellular ligand, or an antigen for which it is specific. [GOC:mgi_curators, ISBN:0781735149]
DESCARTES_FETAL_MUSCLE_STROMAL_CELLS	6.12205e-07	7.40511e-05	0.659444	-0.525911	-2.37447	60	COL1A1, OGN, COL1A2, OSR1, PCOLCE, SCARA5, COL3A1, C1S, MGP, IGFBP6, ISLR, DCN, C1R, KDELR3, DKK2, CTSK, COL12A1, FBLN1, COL8A2, SMOC2, LUM, RSPO3, MRC2, POSTN	C8		descartes DE_gene_by_organ.csv, fold.change>5, qval<0.05, pval<0.05
YAGI_AML_WITH_T_8_21_TRANSLOCATION	6.16596e-07	7.41677e-05	0.659444	-0.300538	-1.79021	324	GPS2, HLA-DQA1, HLA-DQB1, MFAP4, FBLN5, SOCS3, CIITA, TSPAN4, CEP68, EPCAM, ANKLE2, SLIT1, APP, PLAGL1, OSBP, FBXO21, HLA-DRB1, PSD3, AGPAT2, NAA80, TNFRSF21, RCN1, ADCY7, CCN3, UNC13A, CERS6, DUSP14, UGP2, PSMB3, HLA-DRA, NUP50, SLA, VAT1, STK10, IL27RA, S100A4, TNFAIP2, CFD, RGS10, LST1, AIF1, LAPTM5, RASA4, SACS, NCF1, MAN1A1, TLE5, LCP1, ANKRD28, UBA7, GUCY1A1, NUPR1, TNFRSF1A, CD68, GYPC, UF…	C2	CGP	Genes specifically expressed in samples from patients with pediatric AML (acute myeloid leukemia ) bearing t(8;21) translocation.
GOBP_MYELOID_LEUKOCYTE_MIGRATION	6.21098e-07	7.41677e-05	0.659444	-0.373194	-2.04554	172	CD47, PIK3CG, PPIB, MCU, PPBP, LGMN, CCL19, THBS1, ANXA1, CCN3, PIKFYVE, CAMK1D, JAML, DPP4, VAV1, CD300A, C3AR1, VEGFA, AIF1, DUSP1, CCL5, SPI1, RHOH, ROR2, PGF, SYK, NUP85, CCL4, PDGFD, GBF1, FOLR2, PTGER4, CSF3R, SAA1, CCL3, CSF1R, CXCL12, CD200R1, MSMP, OLFM4, CD74, NCKAP1L, MAPK3, CCR1, S100A12, ADAM8, PDGFB, CX3CL1, P2RX4, IL1R1, FCER1G, HRH1, RARRES2, IL17RA, MDK, ARHGEF5, LYN, PECAM1, CXC…	C5	GO:BP	The movement of a myeloid leukocyte within or between different tissues and organs of the body. [GOC:cvs, PMID:22342843, PMID:24157461]
NUYTTEN_EZH2_TARGETS_UP	6.21766e-07	7.41677e-05	0.659444	-0.228066	-1.50033	946	STYK1, CD47, CTH, PRNP, TM2D3, PEA15, PARP12, VSTM2L, TCF20, FLCN, ADGRL1, ANKRD37, ADSS2, IRF6, SPHK1, JPT1, PAFAH1B1, GPR87, MATN3, APP, GLRX, TTC19, DNAJC16, RAB27B, PHLDB2, TRIM58, CTSB, C1S, ABCA5, CEPT1, NTN4, HRK, PLAGL1, RAB8B, MCU, GPX1, LGMN, NRP1, CEBPB, THBS1, RNF149, ANXA1, LAMC2, L3HYPDH, ISG20, TGFBI, B4GALT5, SECTM1, NPTX1, GCNT2, CCN3, CDC42EP3, CYB5A, CAP2, FN1, CITED4, IGFBP3, …	C2	CGP	Genes up-regulated in PC3 cells (prostate cancer) after knockdown of EZH2 [GeneID=2146] by RNAi.
FOROUTAN_PRODRANK_TGFB_EMT_UP	6.45798e-07	7.66811e-05	0.659444	-0.376413	-2.06322	171	PEA15, COL1A1, CRLF1, TAGLN, ITGA5, SPHK1, MATN3, ANKLE2, SCG5, MYL9, TPM4, THBS1, LAMC2, TGFBI, PDLIM7, TGFB1I1, GADD45B, JAG1, FN1, DAAM1, KDELR3, COL4A2, COL4A1, SLC26A2, SACS, LOX, SKIL, ZNF365, JUN, RFTN1, TPM1, MMP2, GLIPR1, FOXD1, NRIP3, ACTN1, RGS4, SMAD7, HMOX1, PODXL, CCN2, MRC2, PID1, POSTN, WNT5A, C3orf52, CDH11, MAF, SERPINE2, ITGB3, TGM2, SLN, HRH1, ALOX5AP, SEMA3C, ADAM12, JUNB, NC…	C2	CGP	Genes up-regulated in the epithelial-mesenchymal transition (EMT) upon transforming growth factor beta (TGFb) stimulation derived from multiple datasets using a product of ranks meta-analysis approach.
GSE22886_NAIVE_CD8_TCELL_VS_DC_DN	7.02177e-07	8.29947e-05	0.659444	-0.351181	-1.95706	193	SNX13, HLA-DQA1, JPT1, CTSB, GPX1, HLA-DRB1, TXN, VAMP8, BID, TRAPPC3, TGFBI, TUBB6, PGD, DAB2, IFI30, PI4K2A, LTBR, TUBA1C, VDAC1, LST1, ATP6V1B2, ANXA2, M6PR, ARL8B, S100A11, MFSD1, GNG10, SYK, AP2S1, ATP6V1A, MNDA, RCOR1, RAB11FIP1, PLCG2, SLC3A2, CD74, IMPDH1, AP2M1, BASP1, KCTD5, CCR1, PPT1, PLOD1, HLA-DMB, ATP6V1F, PGAM1, PCBD1, CLEC7A, HMGCR, FCER1G, NQO1, MACROH2A1, ATP1B1, TOP1, PTGS1, E…	C7	IMMUNESIGDB	Genes down-regulated in comparison of naive CD8 T cells versus unstimulated dendritic cells (DC).
RODWELL_AGING_KIDNEY_NO_BLOOD_UP	7.14858e-07	8.37156e-05	0.659444	-0.352858	-1.96836	194	COL1A1, CDO1, TAGLN, COL14A1, COL1A2, SOCS3, ABI3BP, GGT5, RPS27L, COL3A1, C1S, COL6A3, CFB, SERPING1, ANXA1, ISLR, CCN3, FN1, MRC1, C1R, NNMT, COL15A1, DKK3, TMED3, C7, PCDHA9, ANXA2, CTHRC1, RFTN1, PDIA4, STAB1, TPM1, HIKESHI, SMPD2, MCAM, LUM, RGS1, CDH6, NFKBIZ, PXDN, C3, RARRES1, PGM2L1, KIRREL1, HEXB, PLK2, TFPI, RPN1, CDH11, SPTLC3, PRICKLE1, SERPINE2, C1QA, CAVIN1, C1QC, MYOF, MTHFD1L, GP…	C2	CGP	Genes whose expression increases with age in normal kidney, excluding those with higher expression in blood.
GOMF_OLFACTORY_RECEPTOR_ACTIVITY	7.1691e-07	8.37156e-05	0.659444	0.518041	2.25899	70	OR2L13, OR2L2, OR2L5, OR2L3, OR2AK2, OR2M4, OR2L8, OR2M3, OR2M2, OR2M5, OR6V1, OR6X1, OR2B8P, OR2T4, OR13J1, OR2C1, OR2AG1, OR2T33, OR3A3, OR2D2, OR13C4, OR2AG2, OR1L4, OR5C1, OR2H2, OR10A2	C5	GO:MF	Combining with an odorant and transmitting the signal from one side of the membrane to the other to initiate a change in cell activity in response to detection of smell. [GOC:bf, GOC:dph, GOC:sart, PMID:19135896, PMID:21041441]
FAN_EMBRYONIC_CTX_BIG_GROUPS_BRAIN_IMMUNE	7.17978e-07	8.37156e-05	0.659444	-0.403259	-2.13783	137	ABI3, KLF2, HLA-DRB1, ANXA1, VAMP8, PFN1, ISG20, ANXA11, TAGAP, HCST, GADD45B, CLIC1, IL32, ARHGAP15, CNN2, ARPC2, HLA-DRA, FYB1, STK10, S100A4, CRIP1, MBNL1, GPSM3, LRRFIP1, SP100, DUSP1, LIMD2, LCP1, ARPC1B, S100A11, RHOH, HLA-B, PTPRC, BIN2, S100A10, PTPN6, PLAAT4, ITGAL, HLA-A, IL16, LY6E, CD37, HLA-E, DENND2D, RCSD1, CD74, IFITM1, FERMT3, MYL12A, CARD16, CORO1A, ARHGDIB, CD48, AKNA, HCLS1, I…	C8
REACTOME_PLATELET_ACTIVATION_SIGNALING_AND_AGGREGATION	7.69927e-07	8.93702e-05	0.659444	-0.340275	-1.93304	225	COL1A1, HABP4, PIK3CG, PHACTR2, IGF2, COL1A2, APP, RAB27B, PPBP, SERPING1, THBS1, ISLR, F13A1, PFN1, VCL, PIK3R5, GNA15, PLEK, FN1, PIK3CB, ARRB2, PDPN, CLEC3B, VAV1, ECM1, GAS6, SERPINA3, ALDOA, GNAI2, CFD, ABCC4, CLU, VEGFA, GNB5, YWHAZ, CYRIB, APLP2, MMRN1, PCYOX1L, GNG10, SYK, SOD1, STXBP2, PTPN6, PLCG2, APBB1IP, TIMP3, DGKI, F2RL2, MAPK3, LCP2, ACTN1, FERMT3, CALM1, PRKCD, OLA1, PDGFB, F2R, …	C2	CP:REACTOME	Platelet activation, signaling and aggregation
LIU_PROSTATE_CANCER_DN	8.22112e-07	9.50016e-05	0.659444	-0.280485	-1.72072	427	SSX2IP, SLC47A1, CRABP1, COCH, LSAMP, PLEKHA2, SERPINF1, FBLN5, ACTG2, SLC24A3, NELL2, IGF2, TAGLN, FGFR1, COL14A1, ACTA2, COL1A2, GJC1, MYH11, GPR87, TPM2, CRABP2, MYL9, GRHL1, DES, CTSB, C1S, SVIL, NTN4, PLAGL1, FXYD6, PDLIM4, AOC3, FGD5, MR1, ANO1, ATP2B4, VCL, TUBB6, TGFB1I1, CDC42EP3, EPB41L3, ARL10, C1QTNF1, TFCP2L1, C1R, PLAU, MRGPRF, AJUBA, DKK3, RBMS1, GAS6, LAMB1, GSTM3, SCPEP1, S100A4,…	C2	CGP	Genes down-regulated in prostate cancer samples.
FLECHNER_BIOPSY_KIDNEY_TRANSPLANT_REJECTED_VS_OK_UP	8.6152e-07	9.88915e-05	0.659444	-0.473776	-2.27626	82	COL6A3, ISG20, FCGR1A, IFI30, RBMS1, SLA, UBC, S100A4, CFD, RGS10, LST1, AIF1, LAPTM5, TNFRSF1B, CCL5, LCP1, DOCK2, ARPC1B, RHOH, CD27, PTPRC, CD53, TYROBP, LGALS9, AOAH, GLIPR1, IL10RB, IFITM1, CORO1A, UBE2L6, CD48, GBP2, HCLS1, FCER1G, GMFG, SFN, ENTPD1, CD14, C1QB, LILRB4, CXCR4, IFFO1, RAC2, CELF2, LY86, INPP5D, WARS1, STAT1, HLA-F	C2	CGP	Genes up-regulated in kidney biopsies from patients with acute transplant rejection compared to the biopsies from patients with well functioning kidneys more than 1-year post transplant.
CUI_DEVELOPING_HEART_C5_VALVAR_CELL	8.63415e-07	9.88915e-05	0.659444	-0.358892	-1.99182	189	FMOD, LTBP2, MFAP4, LSAMP, CDO1, SERPINF1, CYP1B1, TAGLN, SOCS3, NXF1, MGP, ADAMTS1, THBS1, B4GALT1, ELN, GADD45B, C1QTNF1, DKK2, CTSK, SRSF7, SLC22A3, BAG3, ENSG00000286190, SOX4, BTG2, UAP1, CLU, GEM, C11orf96, IER3, S100A10, UCHL1, SYNPO2, PXDN, TNFRSF19, TIMP3, ACTN1, PPP1R15A, MMP19, RGS4, CDKN1A, PRELP, XBP1, HSPA1B, CADPS, ARF4, GNG2, CCDC80, IRF1, SLN, HSPA1A, PTGS2, TPBG, CLIC3, HES1, GL…	C8
DESCARTES_FETAL_SPLEEN_MESOTHELIAL_CELLS	8.98299e-07	0.000102434	0.659444	-0.368934	-2.01401	167	SLPI, OGN, COL8A1, SOCS3, C19orf33, GAS1, BMP3, ADAMTS15, INMT, MGP, ANXA1, AOX1, CCN3, PROCR, BMP4, PDPN, PTGIS, KRT18, LRRTM1, EFNB3, CRIP1, TMEM151A, SULF1, DUSP1, IER3, TGM1, S100A10, MSLN, RSPO3, KLF5, FOXF1, PPP1R15A, NXPH2, CDKN1A, ITGA3, KRT19, MAL2, ADAMTSL4, RRAD, HSPA1B, GLP2R, DSG2, WNT2B, WNT5A, SBSPON, CSDC2, MAF, TM4SF1, MCOLN3, SMTNL2, SEMA3C, CLIC3, GLT8D2, PPP1R3B, JUNB, ADAMTS5…	C8		descartes DE_gene_by_organ.csv, fold.change>5, qval<0.05, pval<0.05
DESCARTES_FETAL_HEART_STROMAL_CELLS	9.06366e-07	0.0001029	0.659444	-0.690711	-2.47297	24	COL1A1, SERPINF1, COL1A2, ADAMTS2, PCOLCE, SCARA5, ISLR, DCN, HTRA3, CCN3, FBLN1, LUM, PRELP	C8		descartes DE_gene_by_organ.csv, fold.change>5, qval<0.05, pval<0.05
GSE9988_ANTI_TREM1_VS_VEHICLE_TREATED_MONOCYTES_UP	9.23782e-07	0.00010442	0.659444	-0.36808	-2.00935	167	TLNRD1, CTSV, TXN, CEBPB, EIF4A1, TUBB6, MOAP1, NAA50, CDC42EP3, CHAC1, DAB2, DUSP14, COL15A1, AKIRIN2, BAG3, IL1RL2, PHACTR1, GARS1, NEDD4L, UAP1, S1PR3, SLC26A2, M6PR, GEM, DUSP1, ANKRD28, GFOD1, JUN, HIC1, CCRL2, SLC3A2, RGS1, IARS1, NRIP3, SMIM13, MMP19, CDKN1A, PRKAG2, ETF1, RRAD, P2RX4, MT1H, IL1R1, CSTB, LPL, FNDC3A, NSMAF, CHSY1, DYRK3, PTGS2, HAVCR2, ABL2, RAB20, ZC3HC1, INHBA, ETS2, ACS…	C7	IMMUNESIGDB	Genes up-regulated in comparison of monocytes treated with anti-TREM1 [GeneID=54210] versus untreated monocytes.
DURANTE_ADULT_OLFACTORY_NEUROEPITHELIUM_VASCULAR_SMOOTH_MUSCLE_CELLS	9.48419e-07	0.000106738	0.659444	-0.455157	-2.22871	90	FRZB, ACTG2, TAGLN, COL14A1, ACTA2, SOCS3, MYH11, TPM2, KLF2, GGT5, MYL9, ADAMTS1, THBS1, LPP, TGFB1I1, GADD45B, PLN, CAVIN3, LHFPL6, DEPP1, NDUFA4L2, NR2F2, GEM, GUCY1A1, C11orf96, JUN, MAP1B, TPM1, MCAM, SYNPO2, TIMP3, MYL6, MAP3K20, HSPA1B, PDGFRB, CAVIN1, NOTCH3, PLAC9, HSPA1A, ECRG4, ARID5B, ISYNA1, JUNB, TINAGL1, RCAN2, IGFBP5, FOS, CRISPLD2, STEAP4, EBF1, IGFBP7	C8
GSE10325_LUPUS_BCELL_VS_LUPUS_MYELOID_DN	9.53313e-07	0.000106825	0.659444	-0.346283	-1.9277	192	SLC16A5, CYP1B1, ITGA5, MARCO, CTSB, QPCT, CEBPB, TGFBI, SECTM1, GNA15, EPB41L3, CTSA, ARRB2, GNS, FGL2, APOBR, LTBR, CPD, S100A4, TNFAIP2, CFD, C3AR1, LST1, AIF1, FHOD1, ATP6V1B2, TNFRSF1B, MYO1F, ACTB, TBXAS1, APLP2, TNFRSF1A, HK1, S100A11, STAB1, RAP2B, KCNMB1, ITGAM, FCGR2A, DMXL2, CSF3R, TYROBP, CSF1R, IL1RN, BLVRB, LPAR6, TBC1D8, TPD52L2, ADAP2, HEXB, PTPRE, HMOX1, SDCBP, PLOD1, HK2, CLEC7A…	C7	IMMUNESIGDB	Genes down-regulated in comparison of systemic lupus erythematosus B cells versus systemic lupus erythromatosus myeloid cells.
LI_INDUCED_T_TO_NATURAL_KILLER_UP	9.97122e-07	0.000111252	0.643552	-0.307322	-1.805	289	BATF3, PEA15, NDFIP1, SLC24A3, GLRX, HOPX, PPIB, CAPZB, ARL6IP5, RNF19B, RAB3D, SIRT3, TUBB6, IQGAP2, PDLIM7, GCNT2, AQP9, IFI30, JAML, HMGCS1, TES, APOBR, RBMS1, LASP1, BAG3, SERPINA3, ALDOA, FAM20A, TUBA1C, S100A4, NIBAN2, MYO1F, ANXA2, LRRC8C, CCR5, CCL5, GFOD1, IER3, S100A11, SLC19A2, S100A10, FCGR2A, TYROBP, STX11, CCL3, IL18R1, PLCG2, RGS1, LAT2, GLIPR1, BATF, KCTD10, RHOF, MYO1G, F2RL2, MY…	C2	CGP	Genes up-regulated in ITNK cells (T-lymphocyte progenitors (DN3 cells) reprogrammed to natural killer (NK) cells by ablation of BCL11B [GeneID=64919] gene), compared to the parental DN3 cells.
GOCC_TRANSPORT_VESICLE	1.04101e-06	0.00011565	0.643552	-0.290525	-1.74369	354	GABRA2, HLA-DQA1, HLA-DQB1, SEC31B, SLC32A1, AP3S1, APBA1, BRSK1, STX1A, DLG4, HLA-DRB5, RAB11FIP5, APP, PDCD6, PCSK1, RAB27B, RAB8B, RAB3A, HLA-DRB1, SYT7, RAB3D, OTOF, NPTX1, TRIM9, COPS4, UNC13A, KDELR3, OPRK1, SYTL3, KDELR2, COPZ1, SV2B, TMED3, HLA-DRA, GRIA1, HCK, RAB6A, STX5, RAB3IL1, SLC9B2, LAPTM5, M6PR, PLEKHF2, SEC13, SCAMP1, TOR1A, COPA, SIPA1, COPZ2, CNIH2, AP1G1, RPH3A, HLA-B, ATP6V1…	C5	GO:CC	Any of the vesicles of the constitutive secretory pathway, which carry cargo from the endoplasmic reticulum to the Golgi, between Golgi cisternae, from the Golgi to the ER (retrograde transport) or to destinations within or outside the cell. [GOC:mah, PMID:22160157]
TRAVAGLINI_LUNG_MESOTHELIAL_CELL	1.05415e-06	0.00011661	0.643552	-0.257536	-1.6332	586	CD47, BICC1, PTGFRN, CISD1, HLA-DQA1, HLA-DQB1, SLPI, COL1A1, IGFL2, OGN, LSR, EIF4EBP1, COX6B1, DSP, HLA-DRB5, JPT1, C19orf33, GAS1, BYSL, KPNA2, UPK1B, MARCO, RPS27L, OSR1, CPXM1, COL3A1, KDR, FOXC1, CFB, PKP2, PDLIM4, SLC12A8, GPX1, HLA-DRB1, TXN, IGFBP4, RNF149, VAMP8, B4GALT1, MEDAG, TNFRSF21, B4GALT5, VTN, RGS17, TIMM17A, CYB5A, ERGIC3, CITED4, PROCR, DAB2, IFI30, EIF3M, TOMM22, NNMT, KDELR…	C8
MURARO_PANCREAS_ACINAR_CELL	1.08972e-06	0.000120032	0.643552	-0.251907	-1.60519	618	CCL28, PCBP2, CD47, MUC20, PTGFRN, SERPINF1, LSR, EIF4EBP1, SLC38A1, CD151, JPT1, SOCS3, CYP1A1, TC2N, FAM13A, MLPH, GLRX, ASS1, LMO7, RPS27L, RAB27B, TSPAN13, FOXC1, AKR1C1, CDV3, TP53I11, NTN4, CFB, SORBS2, ADAMTS1, HLA-DRB1, TXN, RAB3D, VAMP8, IMPDH2, AOX1, B4GALT1, POLDIP2, VTN, IQGAP2, STAT6, ANXA11, MYO1C, CHAC1, CYB5A, STK24, TNFAIP8, CAMK1D, C1R, SLC35E1, IGFBP2, KDELR3, IL32, RER1, ATRN,…	C8
GSE22935_WT_VS_MYD88_KO_MACROPHAGE_UP	1.11804e-06	0.000122125	0.643552	-0.363965	-2.01126	184	PTGFRN, TRPV2, PIK3CG, ITGA5, JPT1, ASS1, MARCO, MYO7A, RAB8B, PDLIM4, GPX1, ANXA1, CNPY3, SLC38A10, SHISA5, TGFB1I1, PGD, CERS6, IFI30, FRRS1, TES, KCNN4, HCK, IL27RA, NIBAN2, RGS10, SF3B3, GDA, NCF1, ANXA2, M6PR, MEFV, SULF1, CCL5, SKIL, MFSD1, MMP2, TYROBP, TRAM2, STX11, CD200R1, GLIPR1, CD37, CMTM7, NCKAP1L, SEC24D, LCP2, FSTL1, CCR1, METRNL, SDCBP, ADAR, CD48, HLA-DMB, CSF2RB, GSDMD, CSTB, F…	C7	IMMUNESIGDB	Genes up-regulated in macrophages: wildtype versus MYD88 [GeneID=4615] knockout.
SMIRNOV_CIRCULATING_ENDOTHELIOCYTES_IN_CANCER_UP	1.11816e-06	0.000122125	0.643552	-0.387893	-2.07394	145	ZNF134, ULK1, CYP1B1, SPHK1, CYP1A1, MARCO, CTSB, PPBP, CEBPB, THBS1, YARS1, TGFBI, B4GALT5, GNA15, PDLIM7, AQP9, IGFBP3, PLAU, DKK3, SLA, HCK, CLU, C3AR1, VEGFA, TNFRSF1B, SLC2A3, PRSS23, TNFRSF1A, IER3, IFNGR2, THBD, FCGR2A, MCAM, RGS1, CHN1, SGSH, ADAP2, CCR1, CDKN1A, SMAD7, HMOX1, H2AC8, DHRS3, WNT5A, DHCR7, BLVRA, ALOX5, PERP, CD14, ANPEP, NCF2, PROS1, IRAK3, TGFB1, CXCR1, KDM5B, EPHA4, FBP1…	C2	CGP	Genes up-regulated in circulating endothelial cells (CEC) from cancer patients compared to those from healthy donors.
GOMF_HEPARIN_BINDING	1.16885e-06	0.000127125	0.643552	-0.403389	-2.10703	129	LTBP2, H1-1, NELL2, FGFR1, PAFAH1B1, SLIT1, APP, PCOLCE, ADAMTS15, ADAMTS1, CCN4, NRP1, THBS1, LAMC2, VTN, CCN3, FN1, BMP4, CLEC3B, LPA, PCOLCE2, VEGFA, CFH, SERPIND1, APLP2, PGF, PTPRC, LRPAP1, SMOC2, COL13A1, SAA1, LXN, RSPO3, GREM2, CCN1, ADA2, FSTL1, IMPG1, PRELP, CCN2, NRP2, POSTN, SERPINA5, LPL, SERPINE2, CCDC80, LIPG, TNXB, MDK, SLIT3, COL11A1, ADAMTS5	C5	GO:MF	Binding to heparin, a member of a group of glycosaminoglycans found mainly as an intracellular component of mast cells and which consist predominantly of alternating alpha-(1->4)-linked D-galactose and N-acetyl-D-glucosamine-6-sulfate residues. [GOC:jl, ISBN:0198506732]
TRAVAGLINI_LUNG_PROLIFERATING_MACROPHAGE_CELL	1.22151e-06	0.000132297	0.643552	-0.23182	-1.51569	885	NAPRT, MRPL37, CD47, BATF3, HLA-DQA1, HLA-DQB1, ATP6V1D, CENPH, MPC2, EIF4EBP1, TAGLN, NUDT21, CD151, HLA-DRB5, JPT1, TSPAN4, KPNA2, GLRX, PSMA7, MARCO, RPS27L, CTSB, KIF2C, SVIL, TIMM10, CDK1, GPX1, HLA-DRB1, SERPING1, SLBP, TXN, ANXA1, GRN, VAMP8, PFN1, AGPAT2, TGFBI, PCMT1, FCGR1A, TUBB6, FUOM, YWHAB, PDLIM7, UBE2T, SUMO3, ATP6V1H, PGD, CYB5A, MS4A6A, FN1, PSMD1, DAB2, CTSA, MRC1, IFI30, CAVIN…	C8
GSE22886_NAIVE_TCELL_VS_MONOCYTE_DN	1.26575e-06	0.000136516	0.643552	-0.348347	-1.9432	194	PEA15, CHST15, GLRX, CTSB, PLAGL1, GPX1, QPCT, CEBPB, GRN, BID, PLXNC1, CDC42EP3, PGD, IFI30, OAZ1, GNS, FGL2, APOBR, LTBR, SCPEP1, TNFAIP2, CEBPD, LAPTM5, ATP6V1B2, TNFRSF1B, APLP2, S100A11, NADK, MFSD1, SYK, KCNMB1, IFNGR2, FCGR2A, ATP6V1A, MNDA, DMXL2, CSF3R, NAGK, LAT2, NPC2, VNN2, ADAP2, CCR1, S100A12, HEXB, PRKCD, PTPRE, CASP1, SDCBP, CSF2RB, CLEC7A, USP15, KCTD12, CTBP2, PTTG1IP, PTGS1, SL…	C7	IMMUNESIGDB	Genes down-regulated in comparison of naive CD4 [GeneID=920] CD8 T cells versus monocytes cultured for 0 days.
GSE22140_HEALTHY_VS_ARTHRITIC_GERMFREE_MOUSE_CD4_TCELL_DN	1.28603e-06	0.000138128	0.643552	-0.35863	-1.98989	188	ZNF134, CD47, TNFSF8, MYO7A, LGMN, THBS1, RNF19B, F13A1, TGFBI, SECTM1, GNA15, ERGIC3, MRC1, MAP2K3, CLIC1, ATRN, CTSK, RBMS1, BTG2, OASL, UAP1, S100A4, TNFAIP2, CRIP1, TNFRSF1B, MAN1A1, YWHAZ, GEM, SLC2A3, APLP2, IER3, PRPF4, STAB1, CCL4, KLF6, FCGR2A, FOLR2, PTGER4, TUBB4B, CCL3, BLVRB, SLC3A2, RGS1, BATF, VNN2, LCP2, TPD52L2, PPP1R15A, CCR1, CDKN1A, HMOX1, PDGFB, XBP1, IRF8, P2RX4, RPN1, TRIM2…	C7	IMMUNESIGDB	Genes down-regulated in CD4 [GeneID=920] T cells under germ free conditions: healthy versus arthritis (KRN model).
TRAVAGLINI_LUNG_NONCLASSICAL_MONOCYTE_CELL	1.29797e-06	0.000138835	0.643552	-0.369932	-2.0277	171	TAGLN, ABI3, CHST15, CEBPB, BID, EHBP1L1, RGS18, SECTM1, GNS, FGL2, CD300LF, CD300A, HCK, LTA4H, CD300C, LST1, TNFRSF1B, TBXAS1, DUSP1, PRAM1, SPI1, FGD2, S100A11, PPP1R17, POU2F2, STXBP2, PTPN6, LRRC25, DMXL2, TYROBP, CSF1R, LGALS9, VMO1, ADGRE1, NPC2, RNF144B, NFKBIZ, MYO1G, CD4, TBC1D8, RNPEP, CASP1, HMOX1, RRAS, PAG1, TTYH3, CLEC7A, PIK3AP1, COTL1, CD86, FCER1G, FCGRT, SH3BP2, C15orf39, GCH1,…	C8
MILI_PSEUDOPODIA_CHEMOTAXIS_DN	1.31142e-06	0.000139696	0.643552	-0.276022	-1.68566	404	PRNP, TM2D3, SERPINF1, FGFR1, ITGA5, SLC19A1, SOCS3, APP, TTC19, GALNT18, GSPT1, FZD2, CTSB, C1S, FBLN2, LGMN, NAA40, NRP1, THBS1, GRN, GANAB, SLC38A10, VCL, LAMC1, SIRT3, SLC29A1, SERINC3, PVR, TMEM43, FN1, GLG1, C1R, CLIC1, HMGCS1, GNS, ATRN, SNED1, ECM1, TMEM109, BTG1, KCNN4, SEMA3F, COLGALT1, NEDD4L, SCPEP1, B3GNT2, COL4A1, SF3B3, VCP, SEC61A2, LRRC8C, DUSP1, NPR2, ZFYVE27, RCN3, MPG, APLP2, …	C2	CGP	Transcripts depleted in pseudopodia of NIH/3T3 cells (fibroblast) in response to the chemotactic migration stimulus by lysophosphatidic acid (LPA) [PubChem=3988].
GOCC_MEMBRANE_MICRODOMAIN	1.34555e-06	0.000142744	0.643552	-0.310577	-1.82376	287	PLVAP, ORAI1, PRNP, UNC5A, CLIP3, ARID3A, APP, KDR, PRKAR1A, SLC22A6, ANO1, OPRM1, ATP2B4, SGCA, ASAH2, FLOT2, STAT6, MYO1C, PIKFYVE, CNR1, CAVIN3, SELE, PDPN, TUBB, CD24, PTGIS, DPP4, PI4K2A, HTR2A, AKAP5, HCK, GNAI2, TLR6, TUBA1C, VDAC1, TNFRSF1B, ANXA2, PRKACA, SULF1, TRAF2, PPP2CA, TNFRSF1A, HK1, RFTN1, RAP2B, PTPRC, ITGAM, NOS3, S100A10, CHRNA7, FAS, SMPD2, LAT2, CD4, PRKAR2A, MAPK3, FLOT1, …	C5	GO:CC	A membrane region with a lipid composition that is distinct from that of the membrane regions that surround it. [PMID:20044567, PMID:26253820]
OISHI_CHOLANGIOMA_STEM_CELL_LIKE_DN	1.35376e-06	0.000143029	0.643552	-0.326153	-1.8763	246	TRPV2, CYP1B1, TAGLN, ACTA2, ABI3BP, GAS1, TPM2, MYL9, ADAMTS2, HOPX, COL6A2, TSPAN13, COL3A1, PDLIM4, AOC3, QPCT, PLA2R1, RNF19B, SGCA, ADAM23, RCN1, CITED2, GNA15, TGFB1I1, AQP9, PROCR, CAVIN3, IGF2BP2, CNN2, DEPP1, PTGIS, DKK3, ECM1, RBMS1, KCNN4, NIBAN1, GEM, SIPA1, RCN3, FMO2, HSPG2, ROR2, SYK, IFNGR2, PCK2, TRAM2, STX11, SV2A, KLF5, RHOF, CCZ1, SDF4, RARRES1, XPNPEP1, SEC24D, SNCA, MAPK3, P…	C2	CGP	Genes under-expressed in stem cell-like cholangiocellular carcinoma
GOBP_CELL_CHEMOTAXIS	1.41407e-06	0.000148794	0.643552	-0.330395	-1.8898	236	CCL28, PIK3CG, FGFR1, PPIB, KDR, MCU, PPBP, LGMN, NRP1, CCL19, THBS1, ANXA1, CCN3, PIKFYVE, CAMK1D, JAML, ARRB2, IL10, DPP4, VAV1, GAS6, CCR9, NINJ1, C3AR1, VEGFA, AIF1, GPSM3, CCR5, DUSP1, CCL5, SPI1, LOX, PGF, SYK, NUP85, CCL4, BIN2, PDGFD, GBF1, FOLR2, CSF3R, SMOC2, SAA1, CCL3, CSF1R, LGALS9, CXCL12, CCRL2, MSMP, IL16, CD74, NCKAP1L, MAPK3, CORO1A, CCR1, S100A12, PRKCD, ADAM8, PDGFB, CX3CL1, P…	C5	GO:BP	The directed movement of a motile cell guided by a specific chemical concentration gradient. Movement may be towards a higher concentration (positive chemotaxis) or towards a lower concentration (negative chemotaxis). [GOC:dph]
MATSUDA_NATURAL_KILLER_DIFFERENTIATION	1.592e-06	0.000166838	0.643552	-0.272705	-1.67015	423	CISD1, STAT4, AP3S2, PFDN6, DSP, SOCS3, PAK1, CIITA, FKBP9, GAS1, DPH5, GGT5, SLC5A4, HOPX, FBLIM1, FHIP1B, ARL6, PLAGL1, PKP2, PDLIM4, PSMD13, SYT7, IGFBP4, ANXA1, RNF19B, SESN1, OPRM1, PVR, MATK, EPB41L3, MS4A6A, CACNB4, FGL2, CARD10, EIF5A, KCNN4, SERPINA3, CCR9, ALDOA, SOX4, CPD, MAPK10, CDC23, VCP, CD302, SEC61A2, MYO1F, ACTB, MAN1A1, EDF1, GEM, CCR5, SCAMP1, LIMD2, PRSS23, CCL5, PRIM2, JUN,…	C2	CGP	Genes changed between developmental stages of Valpha14i natural killer T lymphocyte cells (NKT).
GOBP_INTRACELLULAR_PROTEIN_TRANSPORT	1.69419e-06	0.000176831	0.643552	-0.234389	-1.51937	788	STX16, RAB22A, SNX13, PRNP, VPS33B, SEC31B, NAPG, MTERF4, LTBP2, AP3S1, APBA1, STX1A, AP3S2, RGPD1, CLIP3, CEMIP, UBL4B, KPNA2, FAM91A1, SCG5, MLPH, PDCD6, SRP72, RAB27B, ARL6, HSP90AB1, MYO7A, TIMM10, CDK1, RAB8B, HM13, HPCA, TXN, SIAH3, BID, ARL17B, SAMM50, TOMM34, YWHAB, TMEM30B, TIMM17A, MOAP1, MYO1C, PIKFYVE, ABRA, ERGIC3, KPNA6, VPS39, OAZ3, CTSA, HERC2, TOMM22, OAZ1, IPO9, GRPEL2, SYTL3, Y…	C5	GO:BP	The directed movement of proteins in a cell, including the movement of proteins between specific compartments or structures within a cell, such as organelles of a eukaryotic cell. [GOC:mah]
DESCARTES_FETAL_LUNG_MYELOID_CELLS	1.83083e-06	0.000190325	0.643552	-0.402304	-2.09361	126	BATF3, HLA-DQA1, HLA-DQB1, HLA-DRB5, CIITA, SIGLEC1, HTR7, LILRB5, LGMN, HLA-DRB1, TGFBI, FCGR1A, CD209, MS4A6A, IFI30, PLD4, FGL2, CD300LF, HLA-DRA, SIRPB2, HCK, RETN, C3AR1, MEFV, CD163L1, PRAM1, SPI1, CYTH4, FGD2, KCNMB1, LRRC25, FOLR2, CEACAM4, MNDA, ADGRE1, CD74, FLT3, CCR1, IRF8, MS4A14, SIGLEC11, CASP5, LRRK1, CLEC7A, CD86, NAIP, C1QA, C1QC, SLC15A3, PTGS2, CD14, BCL2A1, HAVCR2, C1QB, LILR…	C8		descartes DE_gene_by_organ.csv, fold.change>5, qval<0.05, pval<0.05
GSE10325_CD4_TCELL_VS_BCELL_DN	1.8473e-06	0.000191269	0.643552	-0.369471	-1.99494	156	HLA-DQA1, HLA-DQB1, COCH, P2RX5, ATP10D, CIITA, SLC17A9, CHST15, FCGR2B, ADAM28, TSPAN13, WASF1, HLA-DRB1, B4GALT1, CD180, LAMC1, TUBB6, TBC1D9, MAP3K14, PNOC, HLA-DOB, CD24, HLA-DRA, BLNK, LTA4H, SCPEP1, H2BC12, RHBDF2, PLEKHF2, GFOD1, JUN, SYK, IFNGR2, LYL1, PTPN6, PLCG2, LAT2, BASP1, SMAGP, BEND5, IRF8, TPD52, RRAS2, HLA-DMB, SHMT2, SEL1L3, BANK1, ALOX5, PDLIM1, DENND3, SLC15A3, LHFPL2, ENTPD1…	C7	IMMUNESIGDB	Genes down-regulated in comparison of healthy CD4 [GeneID=920] T cells versus healthy CD19 [GeneID=920] B cells.
SCHERER_PBMC_APSV_WETVAX_AGE_18_32YO_5_TO_7DY_UP	1.89322e-06	0.000195243	0.643552	-0.317723	-1.85074	268	PEA15, HLA-DQB1, SOCS3, FCGR2B, GLRX, MARCO, TPM4, CTSB, HLA-DRB1, SERPING1, CEBPB, RNF149, GRN, EIF4A1, RCN1, FCGR1A, GCNT2, EPB41L3, MS4A6A, FN1, AQP9, IFI30, ZNF671, FGL2, PSMB3, C2, HLA-DRA, RBMS1, LTBR, HCK, NIBAN1, C3AR1, LST1, AIF1, ATP6V1B2, TNFRSF1B, NCF1, ANXA2, GBP1, GNG10, DTX3L, HLA-B, IFNGR2, FAS, MNDA, CES1, IL1RN, LGALS9, TBX19, ADGRE1, NPC2, SOD2, CASP4, LY6E, CD74, NCKAP1L, RNPE…	C7	VAX	Genes up-regulated in peripheral blood mononuclear cell (5 to 7)d vs 0d in adults (18-32) after exposure to APSV Wetvax , time point 5 to 7D
TAVOR_CEBPA_TARGETS_UP	1.90146e-06	0.000195314	0.643552	-0.553685	-2.35323	46	SERPINF1, ANXA1, VCL, SECTM1, BTG1, BTG2, C3AR1, LST1, GBP1, KCNMB1, PTPRC, SPINT2, IL1RN, KLF5, SOD2, GLIPR1, HMOX1, PTX3, GCH1, ARHGEF5, BCL2A1, CXCR4, CD7, NFIL3, RGS2, KIAA0513, SERPINI1, CCND2, AKAP12	C2	CGP	Genes up-regulated in KCL22 cells (chronic myelogenous leukemia, CML, with BCR-ABL1 [GeneID=613;25] fusion) by expression of CEBPA [GeneID=1050].
TRAVAGLINI_LUNG_ALVEOLAR_FIBROBLAST_CELL	1.94144e-06	0.000198633	0.627257	-0.37312	-2.00549	150	MFAP4, LSAMP, CDO1, FBLN5, COL8A1, ABI3BP, ADH1B, COL6A3, INMT, AOC3, GDF10, SERPING1, NRP1, ANXA1, ANO1, ISLR, SLC29A1, ADARB1, FN1, OLFML3, DKK3, MAMDC2, GRIA1, S100A4, IGSF10, DUSP1, SGCG, F11R, FMO2, MMP2, CES1, COL13A1, NABP1, SPINT2, LUM, KCNK6, CCN1, CASP4, SNCA, TIMP3, MMP19, ARHGAP20, PRELP, CCN2, MRC2, DHRS3, MME, PER2, LIMS1, TMEM176B, CDH11, MCOLN3, TGM2, RARRES2, ROBO2, CD14, MYADM, …	C8
ESC_V6.5_UP_EARLY.V1_DN	1.95681e-06	0.000199417	0.627257	-0.381181	-2.02937	140	COL1A1, SERPINF1, FBXO28, C3orf70, IGF2, TAGLN, DSP, COL1A2, SOCS3, APP, PCOLCE, COL3A1, FBLN2, MGP, CFB, ANXA1, LAMC2, NTN1, TUBB6, TGFB1I1, IGFBP3, PLAU, BMP4, MAPK13, S100A4, COL4A2, COL4A1, PNRC2, ANXA2, NUPR1, LOX, TGM1, KLK10, CCN1, CD37, CMTM7, TNFRSF12A, CCN2, ZFP36L1, CADPS, CCDC34, GBP2, BCL3, CACNA1E, TM4SF1, CCDC80, CAVIN1, SFN, TRIM54, JUNB, COL11A1, INHBA, CAMK4, AEBP1, SERPINE1, VA…	C6		Genes down-regulated during early stages of differentiation of embryoid bodies from V6.5 embryonic stem cells.
GSE24634_IL4_VS_CTRL_TREATED_NAIVE_CD4_TCELL_DAY10_DN	1.9812e-06	0.000201111	0.627257	-0.350449	-1.94067	187	TRPV2, SCG5, APP, FZD2, CFB, IGFBP6, SERPING1, TXN, NRP1, CEBPB, GRN, YARS1, RCN1, SECTM1, TUBB6, IQGAP2, PGD, TBC1D9, APOBR, CPD, LMO4, ATP6V1B2, GEM, GBP1, CGGBP1, ERLIN1, MNDA, COL8A2, TYROBP, STX11, IL1RN, BLVRB, SOD2, C3, CCR1, CDKN1A, CLIP1, IGF2R, CASP1, UBE2L6, DHRS3, RRAD, MT1H, GBP2, CRYBG1, PSMA6, CD86, CTBP2, LRP12, CAVIN1, IRF1, MYOF, ATP1B3, SLC31A1, HMG20B, TCIRG1, TPBG, LYN, RAB20…	C7	IMMUNESIGDB	Genes down-regulated in comparison of CD25- T cells treated with IL4 [GeneID=3565] at day 10 versus untreated CD25- T cells at day 10.
AIZARANI_LIVER_C23_KUPFFER_CELLS_3	2.03311e-06	0.000205575	0.627257	-0.347166	-1.94402	200	FBLIM1, CTSB, THBS1, ANXA1, GRN, SECTM1, PLEK, CDC42EP3, JAML, OAZ1, ARRB2, FGL2, SLA, FYB1, SIRPB2, HCK, ALDOA, GNAI2, LTA4H, S100A4, TNFAIP2, CFD, LST1, AIF1, LAPTM5, ATP6V1B2, TNFRSF1B, MYO1F, ACTB, LRRFIP1, SLC2A3, PLCB2, APLP2, PARVG, S100A11, KCNMB1, ITGAM, IFNGR2, POU2F2, S100A10, FCGR2A, MNDA, CSF3R, TYROBP, SMAP2, RNF144B, SOD2, CD37, SAMSN1, ADA2, BASP1, PKM, VNN2, ATP2B1, CCR1, S100A12…	C8
MODULE_24	2.21322e-06	0.000222915	0.627257	-0.290503	-1.74652	358	APOC2, SLPI, COL1A1, IGF2, ITGA5, DSP, COL1A2, GOT1, GLRX, COL6A2, PCOLCE, ITIH2, COL3A1, C1S, AKR1C1, COL6A3, CFB, PPBP, LGMN, IGFBP4, AGPAT2, TGFBI, F10, CITED2, VTN, CYP2E1, IQGAP2, SLC29A1, ELN, CYB5A, FN1, IGFBP3, MAP2K3, IGFBP2, PTTG1, NNMT, IL32, PLK3, CD24, CLEC3B, CARD10, EFNA1, TMED3, C2, ECM1, KRT18, HTR2A, ABCC6, SERPINA3, S100A4, COL4A1, CST7, RGS10, H2BC12, VEGFA, CFH, LAPTM5, TNFRS…	C4	CM	Fetal liver genes - metabolism and xenobiotics.
REACTOME_NEURONAL_SYSTEM	2.22205e-06	0.000222937	0.627257	-0.286034	-1.71673	354	KCNV1, GABRA2, PRKAB1, KCNN1, SLC32A1, APBA1, CREB1, STX1A, DLG4, KCNH5, SLC38A1, GJC1, GABRB2, KPNA2, PRKAR1A, RAB3A, SYT7, ARL6IP5, SLC6A13, ERBB4, FLOT2, ADCY7, TUBB6, KCNQ4, PPM1E, EPB41L3, CACNB4, HCN1, KCNH1, KCNN4, LRRTM1, AKAP5, GRIA1, KCNG3, GNAI2, TUBA1C, PRKACA, GNB5, PLCB2, NSF, GRIA4, SLITRK3, KCNK4, CHRNA6, GNG10, KCNMB1, AP2S1, KCNG1, CHRNA7, CACNG8, NRXN2, SNAP25, KCNJ12, LRFN3, T…	C2	CP:REACTOME	Neuronal System
NAGASHIMA_NRG1_SIGNALING_UP	2.25086e-06	0.000224956	0.627257	-0.366636	-1.99911	165	PWP2, CTH, ARG2, SPHK1, KLF2, FBXO41, YRDC, CEBPB, LAMC2, VCL, ISG20, TNFRSF21, TUBB6, CDC42EP3, GADD45B, STK24, MAP2K3, MAP3K14, TES, NR4A3, MYC, VEGFA, GEM, DUSP1, ZNF365, JUN, IER3, KLF6, WEE1, CCN1, PPP1R15A, TNFRSF12A, CCN2, PER2, C3orf52, IER5, EPHA2, TOP1, PHLDA2, HILPDA, MAP3K8, SFN, EGR4, HES1, EIF5, CXCR4, JUNB, TRA2B, ETS2, SNAI2, LIF, NFIL3, DUSP5, GADD45A, PPRC1, ID3, SIK1, IER2, SER…	C2	CGP	Genes up-regulated in MCF7 cells (breast cancer) after stimulation with NRG1 [GeneID=3084].
GSE19401_NAIVE_VS_IMMUNIZED_MOUSE_PLN_FOLLICULAR_DC_UP	2.26664e-06	0.000225661	0.627257	-0.354287	-1.96579	188	CEMIP, CYP1A1, HSP90AB1, THBS1, RNF19B, EIF3I, F13A1, TGFBI, GNA15, MRC1, MAP2K3, CLIC1, RBMS1, DEFB1, BTG2, OASL, UAP1, S100A4, CRIP1, EIF3K, YWHAZ, GEM, SP100, SLC2A3, DUSP1, STAB1, CCL4, POLG, CCL3, PRKRA, RGS1, CD4, SEC24D, FLOT1, LCP2, GDI2, PPP1R15A, ATP13A3, CDKN1A, S100A12, HMOX1, XBP1, P2RX4, LIMS1, BCL3, TRIM25, CD86, EIF4E2, SLC16A3, PSMC4, SH3GL1, EMP3, PHLDA2, HSPA1A, PIM1, ANPEP, LG…	C7	IMMUNESIGDB	Genes up-regulated in ex vivo follicular dendritic cells from peripheral lymph nodes: naïve versus immunized mice.
GOBP_POSITIVE_REGULATION_OF_CELL_CELL_ADHESION	2.27984e-06	0.000226106	0.627257	-0.327865	-1.87062	233	CD47, HLA-DQA1, HLA-DQB1, IGF2, NCK2, HLA-DRB5, HLA-DRB1, CCL19, ANXA1, CD6, FLOT2, CITED2, CD209, GCNT2, IGFBP2, SELE, IL10, HLA-DOB, NR4A3, PDPN, CD24, DPP4, HLA-DRA, VAV1, IL1RL2, SOX4, RUNX1, EFNB3, IL27RA, IL12RB1, VNN1, AIF1, IL18, CYRIB, CCL5, F11R, MMRN1, RPS3, RHOH, CD27, SYK, PTPRC, PTPN6, HLA-A, LGALS9, CCDC88B, NFKBIZ, HLA-E, CD4, CD74, NCKAP1L, KIFAP3, FLOT1, IL4I1, CORO1A, SMAD7, JA…	C5	GO:BP	Any process that activates or increases the rate or extent of cell adhesion to another cell. [GOC:isa_complete]
TRAVAGLINI_LUNG_BASAL_CELL	2.3873e-06	0.00023586	0.627257	-0.362498	-1.97595	166	PRNP, ARG2, SERPINF1, ABI3BP, GPR87, TPM2, RPL5, CTSB, IGFBP6, IGFBP4, IMPDH2, TGFBI, DCN, C1R, IGFBP2, EIF3M, PDPN, CNN2, RPL23, ARPC2, DKK3, KCNN4, UBC, MYC, LMO4, CLU, DLK2, CFH, ANXA2, RPS3, FBLN1, ACTG1, APOD, RAP2B, THBD, SLC3A2, BASP1, IFITM1, IKBIP, KCTD1, DHRS3, PGAM1, CDK4, PER2, AHCY, EMP3, LDHA, PDLIM1, PERP, SFN, ENO1, GAPDH, LGALS1, LAMB3, ISYNA1, JUNB, TINAGL1, MARCKS, RPL12, RPL14…	C8
HAY_BONE_MARROW_DENDRITIC_CELL	2.40804e-06	0.000237004	0.627257	-0.36969	-2.00068	158	PLVAP, HLA-DQA1, HLA-DQB1, LILRA4, AP3S1, SERPINF1, HLA-DRB5, CIITA, CYP46A1, ARID3A, TPM2, APP, PPIB, TSPAN13, LGMN, HLA-DRB1, TXN, B4GALT1, TGFBI, TNFRSF21, GNA15, SHD, MRC1, JAML, PLD4, TTC39A, SUSD1, HLA-DRA, TMEM109, PHACTR1, PARVG, SEC61G, SPINT2, PLXNA4, TM9SF2, KCNK6, BRK1, CD74, PTMS, UBE2E2, IRF8, HLA-DMB, CSF2RB, RUBCN, SLC20A1, EPHA2, ALOX5AP, LSP1, C12orf75, LILRB4, CUX2, KIRREL3, GP…	C8
MODULE_55	2.49215e-06	0.000244353	0.627257	-0.244937	-1.56433	643	GSTM5, APOC2, SLPI, COL1A1, CRLF1, CRABP1, PDE4C, STX1A, IGF2, EIF4EBP1, FGFR1, ITGA5, DSP, COL1A2, MYH11, GAS1, GOT1, ALDH1B1, EPCAM, TPM2, ADH1B, SCG5, GLRX, MYL9, CYP2C8, COL6A2, PCOLCE, ITIH2, COL3A1, C1S, AKR1C1, COL6A3, COL18A1, MGP, CFB, SORBS2, PPBP, SLC22A6, LGMN, QPCT, IGFBP4, GRN, SLC38A10, CD6, MPPED1, TGFBI, F10, CITED2, VTN, CYP2E1, IQGAP2, ELN, GADD45B, CYB5A, EPB41L3, FN1, AQP9, I…	C4	CM	Genes in the cancer module 55.
GSE25088_ROSIGLITAZONE_VS_IL4_AND_ROSIGLITAZONE_STIM_STAT6_KO_MACROPHAGE_DAY10_DN	2.58476e-06	0.000252477	0.627257	-0.353226	-1.9599	188	SLPI, ATP6V1D, PARP12, PHACTR2, STAT4, FLCN, SPHK1, ALDH1A2, CFB, SERPING1, TXN, VAMP8, EIF4A1, SECTM1, CD209, RCC2, GADD45B, KARS1, PROCR, SND1, GNS, HLA-DOB, NR4A3, SRSF10, RRN3, SEPHS2, TRMT112, VEGFA, DERL1, IER3, PDIA4, SEC61G, DTX3L, CD53, SMPD2, IL1RN, SOD2, NRIP3, C3, ATP13A3, PSMA1, XBP1, YWHAG, MCEMP1, LIMS1, PIK3AP1, POLR2D, CALR, ABCC1, IRF1, TGM2, TBK1, HSPA5, SERP1, EBI3, BCL2A1, C1…	C7	IMMUNESIGDB	Genes down-regulated in bone marrow-derived macrophages with STAT6 [GeneID=6778] knockout treated with rosiglitazone [PubChem=77999]: control versus IL4 [GeneID=3565].
GOMF_CELL_ADHESION_MOLECULE_BINDING	2.71601e-06	0.000264278	0.627257	-0.253981	-1.58892	513	H3C12, CD47, SCYL1, RPS26, VSTM2L, MADCAM1, FBLN5, ADGRL1, IGF2, ITGBL1, ITGA5, DSP, CD151, TSPAN4, EPCAM, DDX6, PHLDB2, COL3A1, CAPZB, KDR, HSP90AB1, ADAM22, PKP2, CCN4, THBS1, ANXA1, PFN1, ADAM23, VCL, TGFBI, PCMT1, PTK7, ATIC, VTN, YWHAB, PVR, CCN3, OBSCN, FN1, STK24, H3C6, CLIC1, SND1, JAML, PTPRT, TES, CNN2, PPME1, KRT18, LASP1, BAG3, LAMB1, ALDOA, STX5, NIBAN2, PTPRM, NINJ1, S1PR3, ANXA2, Y…	C5	GO:MF	Binding to a cell adhesion molecule. [GOC:ai]
GOBP_GRANULOCYTE_MIGRATION	2.72599e-06	0.000264278	0.627257	-0.409172	-2.07313	110	PIK3CG, PPIB, MCU, PPBP, CCL19, THBS1, ANXA1, PIKFYVE, CAMK1D, JAML, DPP4, VAV1, CD300A, C3AR1, CCL5, RHOH, SYK, CCL4, GBF1, PTGER4, CSF3R, SAA1, CCL3, CSF1R, OLFM4, CD74, NCKAP1L, MAPK3, S100A12, ADAM8, CX3CL1, IL1R1, FCER1G, HRH1, RARRES2, IL17RA, MDK, PECAM1, CXCL5, IL34, RAC2, RIPOR2, CD177, CXCR1, SLIT2, SLAMF8, CXCR2, CCL3L3, CXCL8, WDR1, MYD88, TREM1, CCL21, CXCL2, S100A8, EDN3	C5	GO:BP	The movement of a granulocyte within or between different tissues and organs of the body. [GOC:cvs, PMID:24163421, PMID:24193336]
GSE7852_LN_VS_FAT_TCONV_DN	2.74104e-06	0.000264746	0.627257	-0.35431	-1.9463	175	IMPACT, IGF2, RAB11FIP5, TTC19, HOPX, COL3A1, UHRF2, TXN, RNF19B, AKAP13, ATP2B4, VCL, DCN, PLEK, CDC42EP3, HCST, SMAP1, IL10, SRSF7, NUDT4, BAG3, FBXO30, NIBAN1, S100A4, COL4A1, CFD, MYO1F, ANXA2, PTPN9, PLEKHF2, SLC2A3, IER3, S100A11, RAPH1, LUM, PRKRA, SOD2, NFKBIZ, SAMSN1, SEC24D, SNCA, PPP1R15A, CDKN1A, CASP1, METRNL, IL1RL1, LRRK1, CEMIP2, KCTD12, IFITM2, AHCY, HSPA5, GPX8, ENTPD1, CBLB, BC…	C7	IMMUNESIGDB	Genes down-regulated in comparison of lymph node conventional T cells versus fat tissue conventional T cells.
GOBP_LYMPHOCYTE_ACTIVATION	2.84103e-06	0.000273384	0.627257	-0.248466	-1.57602	581	CD47, GPS2, PRNP, HLA-DQA1, SLC39A10, HLA-DQB1, PIK3CG, ARG2, EXOSC6, NDFIP1, IGF2, NCK2, TNFSF8, CD151, HLA-DRB5, FCGR2B, DCAF1, CYP26B1, PRKAR1A, PPP3CB, HLA-DRB1, CEBPB, CCL19, ANXA1, MR1, IMPDH2, CD6, CD180, TNFRSF21, FLOT2, CD209, STAT6, LEPR, IGFBP2, JAML, IL10, HLA-DOB, BMP4, FGL2, CD24, MTOR, DPP4, HLA-DRA, VAV1, IL1RL2, TUSC2, GAS6, CD300A, CCR9, SOX4, BLNK, RUNX1, EFNB3, IL27RA, IL12RB1…	C5	GO:BP	A change in morphology and behavior of a lymphocyte resulting from exposure to a specific antigen, mitogen, cytokine, chemokine, cellular ligand, or soluble factor. [GOC:mgi_curators, ISBN:0781735149]
MODULE_76	2.85968e-06	0.000274159	0.627257	-0.492537	-2.26368	65	AOC3, CEBPB, CCL19, ANXA1, AOX1, FN1, C3AR1, AIF1, CCR5, CCL4, NFATC4, SAA1, CCL3, CXCL12, AOAH, C3, CCR1, S100A12, CX3CL1, IL1R1, ALOX5, ALOX5AP, PTX3, PTGS2, CD14, CXCR4, PTAFR, CXCL5, LY86, FOS, TLR1, CXCR2, CXCL8, CD40, PLA2G7, FPR1, LY75, AGER, CCL21, CXCL2	C4	CM	Inflammatory response.
DESCARTES_FETAL_HEART_MYELOID_CELLS	2.95237e-06	0.000282	0.627257	-0.422331	-2.11306	102	HLA-DQA1, HLA-DRB5, CIITA, SIGLEC1, ADAM28, MARCO, LILRB5, LGMN, HLA-DRB1, CD209, MS4A6A, JAML, PLD4, CD300LF, HLA-DRA, SIRPB2, HCK, C3AR1, CD163L1, SPI1, FGD2, CYP2S1, LRRC25, MNDA, TYROBP, CSF1R, IL1RN, CD74, FLT3, CCR1, IRF8, HLA-DMB, MS4A14, SIGLEC11, LRRK1, CLEC7A, CD86, C1QA, C1QC, CD14, EBI3, C1QB, LILRB4, PILRA, NCF2, SLC37A2, TMEM106A, ACP3, TREM2, ITGAX, MS4A4A, SLC11A1, SLAMF8, MPEG1, …	C8		descartes DE_gene_by_organ.csv, fold.change>5, qval<0.05, pval<0.05
GOBP_RESPONSE_TO_WOUNDING	3.00006e-06	0.000284726	0.627257	-0.264299	-1.63457	462	COL1A1, PIK3CG, ITGA5, DSP, ACTA2, CD151, PAK1, FOXC2, CYP1A1, MYL9, PCSK1, PHLDB2, COL3A1, LYVE1, KDR, CDK1, CCN4, RAB3A, GPX1, SERPING1, SYT7, THBS1, ANXA1, GRN, F13A1, OPRM1, B4GALT1, VCL, F10, PTK7, VTN, PLEK, C1QTNF1, FN1, STK24, MIA3, PROCR, CLIC1, JAML, PIK3CB, IL10, PLAU, PDPN, CNN2, AJUBA, MTOR, VAV1, GAS6, MYC, VEGFA, AIF1, CHMP4C, ACTB, SERPIND1, TOR1A, F11R, LCP1, MMRN1, PPP3CA, ARL8B…	C5	GO:BP	Any process that results in a change in state or activity of a cell or an organism (in terms of movement, secretion, enzyme production, gene expression, etc.) as a result of a stimulus indicating damage to the organism. [GOC:go_curators]
HADDAD_T_LYMPHOCYTE_AND_NK_PROGENITOR_DN	3.00291e-06	0.000284726	0.627257	-0.506848	-2.24296	55	SERPINF1, LGMN, F13A1, PLEK, MS4A6A, CD24, HCK, CCR9, BLNK, CST7, CFD, CRIP1, CEBPD, NRXN2, TYROBP, CCL3, CSF1R, MCM4, SLC2A5, IRF8, MME, LGALS1, CD7, GPR183, JCHAIN, RNASE6, LY86, IL7R, LEF1	C2	CGP	Genes down-regulated in hematopoietic progenitor cells (HPC) of T lymphocyte and NK (natural killer) lineage.
REACTOME_REGULATION_OF_INSULIN_LIKE_GROWTH_FACTOR_IGF_TRANSPORT_AND_UPTAKE_BY_INSULIN_LIKE_GROWTH_FACTOR_BINDING_PROTEINS_IGFBPS	3.05533e-06	0.000288639	0.627257	-0.43597	-2.14564	93	IGF2, MATN3, APP, ITIH2, IGFBP6, IGFBP4, RCN1, LAMC1, SHISA5, FN1, IGFBP3, MIA3, IGFBP2, BMP4, HRC, GAS6, LAMB1, FAM20A, SERPIND1, MBTPS1, PRSS23, APLP2, MEN1, MMP2, MSLN, CCN1, MGAT4A, C3, FSTL1, LTBP1, PDIA6, TGOLN2, NUCB1, LGALS1, SDC2, MEPE, SERPINA1, P4HB, FAM20C, IGFBP5, MXRA8, KNG1, PAPPA, HSP90B1, IGFBP7, WFS1, FBN1, CHGB, TNC, IL6, LAMB2, FUCA2, MFGE8	C2	CP:REACTOME	Regulation of Insulin-like Growth Factor (IGF) transport and uptake by Insulin-like Growth Factor Binding Proteins (IGFBPs)
YAMAZAKI_TCEB3_TARGETS_UP	3.23814e-06	0.000304797	0.627257	-0.368267	-1.98445	154	TLNRD1, CTSV, SLC38A1, FKBP9, APP, FBLN2, LGMN, SERPING1, IGFBP4, LPP, VAMP8, GANAB, SUSD2, RCN1, LAMC1, CITED2, CLIC1, KDELR3, GNS, KDELR2, PGA4, LAMB1, COL4A2, COL4A1, PTPRM, CLU, VEGFA, NR2F2, CYP26A1, NID2, ANXA2, PTPN9, HSPG2, GNG10, THBD, LRPAP1, RCOR1, GHR, CUL1, GREM2, CCN1, PXDN, TIMP3, HERPUD1, CALM1, PLOD1, TFPI, GALNT2, ARF4, FNDC3A, ATP1B1, GNAS, P4HB, SRGN, TTR, SURF4, TMED2, RRBP1,…	C2	CGP	Genes up-regulated in embryonic stem cells from TCEB3 [GeneID=6924] knockout mice.
FAN_EMBRYONIC_CTX_BIG_GROUPS_CAJAL_RETZIUS	3.27367e-06	0.000307026	0.627257	-0.268093	-1.64751	441	CD47, CLUL1, LSAMP, HYAL3, STX1A, IRF6, FKBP9, GOT1, SCG5, NAP1L5, CCDC13, CRABP2, PSMA7, ADAMTS2, PCSK1, STMN3, COL18A1, PRKAR1A, CLEC2L, FBLN2, FAM118A, TMEM59L, PKP2, NDUFA8, RAB3A, QPCT, TXN, AGPAT2, TMEM14A, PCMT1, PLCB4, TIMM17A, ATP6V1H, CYB5A, ADARB1, HSPA12A, HMGCS1, LHFPL6, DIRAS2, SUSD1, SV2B, RBMS1, C7, DEFB1, GAS6, VAT1, ALDOA, PCOLCE2, CLU, CYP26A1, SEC61A2, DIABLO, INSM2, TMEM151A,…	C8
GSE21546_WT_VS_SAP1A_KO_AND_ELK1_KO_ANTI_CD3_STIM_DP_THYMOCYTES_UP	3.336e-06	0.000311741	0.627257	-0.361769	-1.97569	168	COL1A1, LSAMP, ACTG2, TAGLN, OTUD1, RAB27B, FOXC1, CCDC68, IGFBP6, ARL6IP5, VCL, ZNF540, H3C6, OLFML3, DKK2, ATRN, CCNDBP1, KCNN4, KRT18, ZNF155, BTG2, CYP26A1, CEBPD, ITPRIPL2, DUSP1, LCP1, SCYL2, MYL12B, TTC8, SNX16, NAPB, AIG1, KIFAP3, PGM2L1, SMAGP, FSTL1, LTBP1, CLIP1, MMD, CADPS, ZNF177, SAMD9L, RAB6B, DNAJB6, SPIN1, CEMIP2, DYNLRB1, RND3, SOCS6, TAGLN3, PRKCH, MYADM, PCDHB10, EHD3, NCOA4, …	C7	IMMUNESIGDB	Genes up-regulated in double positive thymocytes stimulated by anti-CD3: wildtype versus ELK1 and ELK4 [GeneID=2002;2005] knockout.
TRAVAGLINI_LUNG_CLASSICAL_MONOCYTE_CELL	3.39437e-06	0.000316055	0.627257	-0.305906	-1.76855	253	CYP1B1, CHST15, GPX1, CEBPB, THBS1, RNF149, EHBP1L1, TGFBI, PGD, MS4A6A, IFI30, ARRB2, GNS, FGL2, CD300LF, HCK, LTA4H, SCPEP1, S100A4, TNFAIP2, TMSB10, CEBPD, ATP6V1B2, TNFRSF1B, MYO1F, NCF1, APLP2, PRAM1, SPI1, RASSF3, TNFRSF1A, FGD2, ACTR2, NADK, MFSD1, SYK, ITGAM, POU2F2, STXBP2, FCGR2A, LRRC25, MNDA, DMXL2, CSF3R, TYROBP, LGALS9, BLVRB, NPC2, RNF144B, AOAH, CD4, CARD16, CCR1, S100A12, PRKAG2,…	C8
HALLMARK_ALLOGRAFT_REJECTION	3.42288e-06	0.000317568	0.627257	-0.371585	-1.99941	152	CD47, HLA-DQA1, STAT4, FCGR2B, CCL19, IL10, HLA-DOB, UBE2N, C2, HLA-DRA, EIF5A, FYB1, TLR6, IL27RA, IL12RB1, IL18, CCR5, TRAF2, CCL5, SPI1, STAB1, PTPRC, CCL4, IFNGR2, FAS, MRPL3, PTPN6, ITGAL, HLA-A, EIF3D, IL16, HLA-E, CD4, CD74, LCP2, CCR1, MAP4K1, IRF8, TPD52, HLA-DMB, F2R, GBP2, BCL3, HCLS1, CD86, ST8SIA4, DYRK3, CD3E, LYN, FGR, HLA-DOA, CD7, INHBA, SRGN, GCNT1, LIF, NLRP3, TGFB1, GALNT1, LY…	H		Genes up-regulated during transplant rejection.
REACTOME_LEISHMANIA_INFECTION	3.51851e-06	0.000325273	0.627257	-0.340621	-1.89937	196	CREB1, SUGT1, APP, HTR7, GGT5, POMC, PRKAR1A, HSP90AB1, WASF1, TXN, FCGR1A, ADCY7, MYO1C, VIP, IL10, ARPC2, VAV1, HCK, GNAI2, C3AR1, IL18, ACTB, PRKACA, RHBDF2, GNB5, GLP1R, MEFV, ARPC1B, ACTG1, ACTR2, CRHR2, JUN, GNG10, SYK, MYO5A, FCGR2A, PTGER4, PLCG2, PRKAR2A, C3, BRK1, NCKAP1L, MAPK3, DPEP2, ARPC3, CALM1, CASP1, HMOX1, PLK2, P2RX4, WIPF3, ARPC1A, GLP2R, GSDMD, WNT5A, ACTR3, GNG2, GPR83, GNAS…	C2	CP:REACTOME	Leishmania infection
GOBP_CELL_KILLING	3.68284e-06	0.000338407	0.627257	-0.397658	-2.0465	119	GNLY, CLEC2A, FCGR2B, HSP90AB1, PPP3CB, HLA-DRB1, RNF19B, MR1, FCGR1A, PVR, ARRB2, IL10, TUBB, HLA-DRA, VAV1, TUSC2, IL12RB1, H2BC12, MICA, CFH, IL18, CYRIB, SPI1, H2BC11, AP1G1, ARL8B, SYK, HLA-B, PTPRC, ITGAM, STXBP2, PTPN6, TYROBP, TUBB4B, HLA-A, LGALS9, UNC13D, CADM1, HLA-E, C3, NCKAP1L, CORO1A, S100A12	C5	GO:BP	Any process in an organism that results in the killing of its own cells or those of another organism, including in some cases the death of the other organism. Killing here refers to the induction of death in one cell by another cell, not cell-autonomous death due to internal or other environmental conditions. [GOC:add]
MANNO_MIDBRAIN_NEUROTYPES_HSERT	3.68672e-06	0.000338407	0.627257	-0.275913	-1.68291	401	SMIM17, CD47, RBFOX3, TRPV2, APBA1, XPR1, NDFIP1, SLC24A3, CREG2, FNDC9, FAR2, GABRB2, GOT1, MGAT4C, SCG5, NAP1L5, SORCS3, MTUS2, AKR1C1, B9D1, ADAM22, TMEM59L, HPCAL4, INA, TMEM14A, PLXNC1, RGS17, SLC12A5, TPH2, HSPA12A, MLLT11, GDAP1L1, DIRAS2, GPR26, NSG2, GRIA1, IL27RA, PTPRM, ATL1, RASA4, TMEM151A, CTHRC1, CNIH2, GFOD1, GRIA4, HS6ST3, SEZ6, CDKN2D, MAP1B, MYO5A, ATCAY, POU2F2, UCHL1, CACNG8,…	C8		Cell types are named using anatomical and functional mnemonics prefixed by 'm' or'h' to indicate mouse and human respectively: OMTN, oculomotor and trochlear nucleus; Sert, serotonergic; NbM, medial neuroblast; NbDA, neuroblast dopaminergic; DA0-2, dopaminergic neurons; RN, red nucleus; Gaba1-2, GABAergic neurons; mNbL1-2, lateral neuroblasts; NbML1-5, mediolateral neuroblasts; NProg, neuronal pr…
PETROVA_PROX1_TARGETS_DN	3.81421e-06	0.000348872	0.627257	-0.525431	-2.29241	52	PRNP, LTBP2, ITGA5, PDLIM4, ARL6IP5, NRP1, TNFRSF21, GLCE, CAP2, PROCR, MLLT11, NNMT, IL32, PLAU, TCN2, BMP6, LYL1, TRAM2, ADGRG6, RGS4, ARHGDIB, GBP2, EMP3, SRGN, SERPINE1, CD59, MMP14, SLC38A6, LY75, TRIM22, PRKACB, IL6	C2	CGP	Genes specific to BEC (blood endothelium cells) repressed in BEC by expression of PROX1 [GeneID=5629] off adenovirus vector.
HSIAO_HOUSEKEEPING_GENES	3.9278e-06	0.000357997	0.610527	-0.277757	-1.68058	375	PCBP2, GPS2, HLA-DQA1, RPS26, HLA-DQB1, FMOD, AP3S1, COX6B1, EIF3C, HSP90AB1, MGP, TXN, APEX1, PFN1, EIF4A1, ISG20, ATIC, YWHAB, ANXA11, KARS1, CLIC1, OAZ1, RER1, RPL23, ARPC2, PTDSS1, HNRNPF, PSMB3, HLA-DRA, LASP1, RPL19, SERPINA3, CCR9, ALDOA, UBC, BTG2, LTA4H, SSR2, CLU, TMSB10, ANXA2, ACTB, YWHAZ, TLE5, DUSP1, COPA, APLP2, RPS3, ACTG1, RFTN1, HLA-B, SOD1, EEF1G, S100A10, FAS, PTPN6, HLA-A, PI…	C2	CGP	Housekeeping genes identified as expressed across 19 normal tissues.
TGANTCA_AP1_C	4.05608e-06	0.000368391	0.610527	-0.219819	-1.44482	925	SKIDA1, PRLHR, AHI1, ORAI1, PEA15, COL1A1, PSMD4, LRRN4CL, STX1A, MARK1, DLG4, SLC38A1, CD151, PAFAH1B1, C19orf33, ABI3, GPR87, TPM2, FAM91A1, WNT3, APP, ASS1, RAB27B, ROCK2, DES, GPR158, LYVE1, SVIL, CEPT1, NTN4, OSBP, GPX1, IGFBP6, HPCAL4, THBS1, RAB3D, LPP, LAMC2, PFN1, TRAPPC3, VCL, ISG20, LAMC1, NLK, SHISA5, YWHAB, TRIM9, STAT6, NAA50, ATP6V1H, GADD45B, WNT6, TMEM43, PROCR, PSMD1, CLIC1, CAV…	C3	TFT:TFT_Legacy	Genes having at least one occurrence of the highly conserved motif M7 TGANTCA in the regions spanning 4 kb centered on their transcription starting sites [-2kb, +2kb]. This matches the JUN [GeneSymbol=JUN] transcription factor binding site V$AP1_C (v7.4 TRANSFAC).
GSE24574_NAIVE_VS_TCONV_CD4_TCELL_DN	4.15008e-06	0.000375611	0.610527	-0.342222	-1.894	186	PWP2, PEA15, CAND1, R3HDM1, ATP10D, ANKLE2, POP4, MMACHC, HSP90AB1, TXN, EIF3I, EIF4A1, RCN1, SUCLA2, TIMM17A, ADARB1, PSMD1, HNRNPF, PSMB3, UAP1, RGS10, VCP, LAMA2, BCAT2, PPP2CA, MRPS27, CCL4, VDAC3, PDCD2, LPCAT1, IL18R1, GFUS, SLC3A2, PKM, PPT1, FAM98A, PGAP1, CD48, RRAS2, CDK4, PER2, PSMA6, IL1R1, EIF4E2, AHCY, LPL, NSMAF, CHSY1, NCKAP1, ATP1B3, ENO1, LYST, MYDGF, SPRY1, COPS8, SRGN, DUSP5, …	C7	IMMUNESIGDB	Genes down-regulated in naïve CD4 [GeneID=920] Tcells versus T conv cells.
GOBP_REGULATION_OF_RESPONSE_TO_EXTERNAL_STIMULUS	4.36614e-06	0.000393789	0.610527	-0.232634	-1.50274	748	PCBP2, CD47, GPS2, PIK3CG, YTHDF1, ARG2, TLR10, COCH, SERPINF1, NDFIP1, FGFR1, SPHK1, SOCS3, PAK1, SLIT1, FCGR2B, WNT3, APP, HOPX, PHLDB2, MFHAS1, KDR, HSP90AB1, MCU, CCN4, GPX1, LGMN, HLA-DRB1, SERPING1, POLR3B, NRP1, CEBPB, CCL19, THBS1, ANXA1, GRN, VAMP8, OPRM1, CD180, VTN, PVR, CCN3, C1QTNF1, STK24, CNR1, KARS1, CAMK1D, SELE, ARRB2, IL10, PLAU, APOBEC3G, APOBEC3F, FGL2, PTGIS, DPP4, AKIRIN2, …	C5	GO:BP	Any process that modulates the frequency, rate or extent of a response to an external stimulus. [GOC:mah]
GOBP_LEUKOCYTE_MEDIATED_CYTOTOXICITY	4.40997e-06	0.0003954	0.610527	-0.423025	-2.07968	92	CLEC2A, FCGR2B, PPP3CB, HLA-DRB1, RNF19B, MR1, FCGR1A, PVR, ARRB2, TUBB, HLA-DRA, VAV1, TUSC2, IL12RB1, MICA, IL18, CYRIB, SPI1, AP1G1, ARL8B, HLA-B, PTPRC, ITGAM, STXBP2, PTPN6, TYROBP, TUBB4B, HLA-A, LGALS9, UNC13D, CADM1, HLA-E, NCKAP1L, CORO1A	C5	GO:BP	The directed killing of a target cell by a leukocyte. [GO_REF:0000022, GOC:add, ISBN:0781735149, PMID:11911826]
FAN_OVARY_CL6_PUTATIVE_EARLY_ATRETIC_FOLLICLE_THECAL_CELL_2	4.41454e-06	0.0003954	0.610527	-0.316029	-1.8484	277	GSTM5, COL1A1, AP3S1, MFAP4, SERPINF1, OGN, TAGLN, ACTA2, COL1A2, SOCS3, TSPAN4, TPM2, APP, MYL9, TPM4, COL6A2, CPXM1, COL3A1, C1S, SVIL, CAPZB, COL6A3, COL18A1, MGP, FXYD6, FBXO21, ADAMTS1, SERPING1, IGFBP4, IMPDH2, DCN, RCN1, TGFB1I1, GADD45B, CYB5A, FN1, IGFBP3, C1R, LHFPL6, OLFML3, CTSK, DEPP1, C7, GSTM3, BTG2, CFD, NR2F2, CEBPD, ARL1, CFH, DUSP1, FBLN1, GYPC, JUN, IER3, ARL4D, TPM1, LRPAP1, …	C8		TC from (early atretic) follicle D and present in stromal samples were mainly present in CL2 and CL6 (Fig. 4a, Supplementary Fig. 2c), suggesting that those may represent atretic TC. The TC in CL2 and CL6 expressed IFITM3, lower levels of COL3A1 and higher levels of FOS and IGFBP5 compared to the TC in CL5 (Fig. 8a).
FLETCHER_PBMC_BCG_10W_INFANT_BCG_STIMULATED_VS_UNSTIMULATED_10W_DN	4.46635e-06	0.000398661	0.610527	-0.31554	-1.80857	240	ZNF366, CYP1B1, CD151, SPHK1, SCG5, ALDH1A2, TPM4, CTSB, CEBPB, ANXA1, GPR35, TGFBI, TNFRSF21, PDLIM7, ANXA11, SPINT1, HCST, DAB2, IFI30, IGF2BP2, FGL2, KCNN4, PI4K2A, LTBR, S100A4, CD300C, NIBAN2, C3AR1, AIF1, ANXA2, TBXAS1, CCR5, SPI1, CYTH4, S100A11, STAB1, ITGAM, S100A10, PTPN6, ATP6V1A, MNDA, TYROBP, CSF1R, IL1RN, ICAM5, CD84, NPC2, GLIPR1, C3, PKM, MMP19, ADAP2, CCR1, IGF2R, HEXB, PTPRE, HM…	C7	VAX	Genes down-regulated in peripheral blood mononuclear cell stimulated vs unstimulated in infants (10w) after exposure to BCG (Danish strain BCG Statens Serum Institut, Denmark) , time point 10W. Comment: PBMCs drawn at 10 weeks following immunization at birth
GSE15767_MED_VS_SCS_MAC_LN_UP	4.56836e-06	0.000405839	0.610527	-0.350904	-1.92759	175	HLA-DQA1, NKPD1, APBA1, SIGLEC1, RAB11FIP5, CAPZB, INMT, HLA-DRB1, SRL, THBS1, GPR35, ASAH2, TNFRSF21, IQGAP2, MYO1C, EPB41L3, HSPA12A, GAS6, TEP1, TCN2, NINJ1, NCF1, F11R, ERLIN1, GPR160, CD68, NADK, STAB1, MFSD1, PTPN6, ACP5, NPC2, NCKAP1L, IL10RB, PRKCD, METRNL, PID1, NRP2, IRF8, CSF2RB, MCEMP1, CLEC7A, KCNMB2, IFITM2, FCER1G, SMTNL2, DACT2, IFITM3, LYN, MEF2A, PKIG, NIPA2, CD276, PROS1, TMEM1…	C7	IMMUNESIGDB	Genes up-regulated in comparison of medullary macrophages versus subcapsular sinus (SCS) macrophages.
GSE9650_NAIVE_VS_EFF_CD8_TCELL_DN	4.57813e-06	0.000405839	0.610527	-0.351241	-1.93694	179	FCGR2B, WNT3, GLRX, HOPX, PPIB, CDK1, NDUFA8, NRP1, ANXA1, RNF19B, LAMC1, CTSA, PTTG1, DKK2, SMAP1, FGL2, ENSG00000286190, S100A4, MYO1F, ANXA2, ACTB, GEM, CCR5, CCL5, CD68, PRIM2, S100A11, STAB1, COMMD1, ITGAM, S100A10, ACTC1, ITGAL, HLA-A, IL18R1, LXN, PRELID1, CASP4, BATF, YKT6, LMAN2, MAPK3, SNTB2, PSMD8, CASP1, JAK1, ARHGDIB, CD48, HK2, CSTB, FCGRT, BSCL2, GABARAPL1, ENTPD1, CAPNS1, PTGR1, B…	C7	IMMUNESIGDB	Genes down-regulated in comparison of naive CD8 T cells versus effector CD8 T cells.
GSE17721_LPS_VS_POLYIC_16H_BMDC_DN	4.71551e-06	0.00041659	0.610527	-0.345338	-1.91614	188	RAB22A, PARP12, YTHDF1, STAT4, COCH, PLEKHA2, EIF4EBP1, NCK2, SPHK1, MAD2L1BP, TSPAN13, MFHAS1, KDR, CEPT1, RAB8B, NAA80, ADAM23, GCNT2, MRC1, CACNB4, CTSK, GMPPB, RBMS1, SOX4, TPX2, E2F3, CCR5, F11R, PARVG, AVL9, NFE2L1, S100A11, CCL4, TSPAN5, YWHAH, TBC1D8, FAM53C, MMP19, SEMA4F, ARL14EP, MMD, SNRK, SPIN1, USP15, TRIM25, CD86, CDH11, ACTR3, CAMK2D, C15orf39, SOCS6, CHMP1A, PTGS1, LGALS1, NAXE, …	C7	IMMUNESIGDB	Genes down-regulated in comparison of dendritic cells (DC) stimulated with LPS (TLR4 agonist) at 16 h versus DC cells stimulated with poly(I:C) (TLR3 agonist) at 16 h.
FAN_OVARY_CL14_MATURE_SMOOTH_MUSCLE_CELL	4.73909e-06	0.00041725	0.610527	-0.297636	-1.75323	293	MFAP4, FRZB, TAGLN, COX6B1, ACTA2, CD151, SOCS3, MYH11, TPM2, MYL9, TPM4, COL18A1, MGP, SORBS2, FXYD6, ADAMTS1, AOC3, SERPING1, ARL6IP5, PFN1, PDLIM7, TGFB1I1, GADD45B, PLN, CAVIN3, LHFPL6, UGP2, SRSF7, DEPP1, NUDT4, EIF5A, BTG2, S100A4, NDUFA4L2, NR2F2, CRIP1, ACTB, GEM, DUSP1, APLP2, ARPC1B, GUCY1A1, JUN, IER3, S100A11, PGF, MAP1B, TPM1, MCAM, CCN1, YWHAH, BRK1, TIMP3, MYL6, AP2M1, IFITM1, ACTN…	C8		The clusters of smooth muscle cells (CL14, CL17) also showed features of growth and remodeling: many DEGs of CL17 (such as CRYAB, GJA4) were involved in regulation of immune response and apoptosis, whereas DEGs of CL14 (such as ACTA2, PLN, ADIRF, and MYH11) associated with mature smooth muscle cells (Fig. 3e-g).
FAN_EMBRYONIC_CTX_BRAIN_MYELOID	4.77824e-06	0.00041927	0.610527	-0.38948	-2.03207	128	HLA-DQB1, SIN3B, SOCS3, KLF2, HLA-DRB1, CEBPB, ANXA1, TGFBI, SECTM1, HCST, MS4A6A, IFI30, JAML, FGL2, APOBR, HLA-DRA, HCK, RETN, S100A4, TNFAIP2, CFD, LST1, CRIP1, MYO1F, ANXA2, LRRFIP1, PLCB2, PRAM1, SPI1, S100A11, NLRP1, HLA-B, POU2F2, STXBP2, S100A10, LRRC25, ITGAL, HLA-A, LY6E, NFKBIZ, CD74, ADA2, CARD16, CD48, PANK2, CLEC7A, CHCHD10, TMEM176B, IER5, TRIM25, COTL1, IFITM2, EMP3, IRF1, LSP1, I…	C8
GOLDRATH_ANTIGEN_RESPONSE	4.87843e-06	0.000426615	0.610527	-0.298295	-1.76311	306	BATF3, CISD1, HLA-DQA1, SLPI, SSX2IP, KPNA2, GLRX, HOPX, TPM4, KIF2C, CDK1, HLA-DRB1, TXN, NRP1, ANXA1, VCL, CITED2, UBE2T, SERINC3, GADD45B, MAP2K3, IFI30, PLD4, FGL2, CD24, NUDT4, BAG3, CKS1B, SERPINA3, NUSAP1, SCPEP1, S100A4, IGSF10, IL12RB1, MYO1F, ANXA2, M6PR, GEM, SP100, SLC2A3, CCR5, DUSP1, CCL5, CD68, PRIM2, INCENP, IER3, S100A11, CDCA5, GNG10, TACC3, LYL1, S100A10, PTGER4, TYROBP, CDC6, …	C2	CGP	Genes up-regulated at the peak of an antigen response of naive CD8+ [GeneID=925;926] T-cells.
TRAVAGLINI_LUNG_ALVEOLAR_EPITHELIAL_TYPE_1_CELL	4.94503e-06	0.000430984	0.610527	-0.281429	-1.68983	356	CD47, FBLN5, TAGLN, COL8A1, CD151, OTUD1, ABI3BP, TSPAN4, FKBP9, EPCAM, MATN3, KLF2, LMO7, MYL9, GALNT18, HOPX, TPM4, PHLDB2, TSPAN13, ARL6IP5, LAMC2, B4GALT1, SUSD2, ATP2B4, VCL, ISG20, LAMC1, TUBB6, MYO1C, SPINT1, GADD45B, EPB41L3, FN1, IL32, TES, PDPN, EFNA1, ZFYVE9, COL12A1, TMEM109, KRT18, GAS6, UBC, NEDD4L, SSR2, S100A4, B3GNT2, COL4A2, COL4A1, VEGFA, OSGIN2, IL18, ANXA2, ACTB, SLC2A3, DUSP…	C8
WALLACE_PROSTATE_CANCER_RACE_UP	4.98887e-06	0.000433345	0.610527	-0.313919	-1.80493	244	HLA-DQA1, HLA-DQB1, PARP12, CPZ, OLFML2A, FCGR2B, ADAM28, GLRX, ADAMTS1, CCN4, HLA-DRB1, CCL19, ISG20, SECTM1, ADCY7, PLEK, MRC1, SELE, ARHGAP15, NR4A3, APOBEC3G, FGL2, HLA-DRA, SLA, FYB1, GSTM3, CLU, CEBPD, LAPTM5, RASA4, CCR5, GBP1, CCL5, PRIM2, CD27, NLRP1, HLA-B, ARHGAP25, PTPRC, CCL4, CD53, THBD, ITGAL, RGS1, GLIPR1, IL16, CD37, HLA-E, SAMSN1, SF1, NCKAP1L, ADA2, LCP2, IFITM1, MMP19, CORO1A,…	C2	CGP	Genes up-regulated in prostate cancer samples from African-American patients compared to those from the European-American patients.
ATF2_S_UP.V1_DN	5.14393e-06	0.00044532	0.610527	-0.362277	-1.96056	158	FMOD, CRLF1, CYP1B1, ITGBL1, CEMIP, NPFF, GAS1, ADH1B, POLE, DES, FBLN2, ADAM22, SLC12A8, SERPING1, VTN, ADARB1, PLN, IGFBP2, COL15A1, PTGIS, RNF39, DPP4, SERPINA3, NDUFA4L2, CSGALNACT1, CD302, LAMA2, SGCG, C1RL, TENM4, SIK2, ERO1A, BMP6, STXBP2, ADORA3, CCIN, SPINT2, RARRES1, CLGN, PID1, TPD52, PNMA2, IL1R1, KCTD12, RHCE, GCH1, STMN2, ENO2, PTGS2, SLIT3, TMEM176A, ITIH5, COL11A1, SLC29A3, CELF2,…	C6		Genes down-regulated in myometrial cells over-expressing a shortened splice form of ATF2 [Gene ID=1386] gene.
GOBP_CELL_SUBSTRATE_ADHESION	5.16275e-06	0.00044546	0.610527	-0.290746	-1.72924	320	CCL28, WHAMM, COL1A1, MADCAM1, PLEKHA2, FBLN5, ITGBL1, ITGA5, COL8A1, ABI3BP, SIGLEC1, ROCK2, PHLDB2, COL3A1, LYVE1, KDR, FBLN2, NTN4, NRP1, THBS1, VCL, POLDIP2, LAMC1, VTN, RCC2, GCNT2, JAG1, FN1, DAB2, PIK3CB, ATRN, PLAU, PDPN, ARPC2, SNED1, AJUBA, EFNA1, GAS6, LAMB1, VEGFA, NID2, GBP1, PARVG, FBLN1, ACTG1, APOD, ITGAM, S100A10, MEN1, ST6GAL1, LAMC3, COL13A1, EGFLAM, ITGAL, UNC13D, GFUS, MSLN, …	C5	GO:BP	The attachment of a cell to the underlying substrate via adhesion molecules. [GOC:mah, GOC:pf]
VECCHI_GASTRIC_CANCER_ADVANCED_VS_EARLY_UP	5.24579e-06	0.00045112	0.610527	-0.361965	-1.95887	158	HLA-DQB1, LTBP2, CYP1B1, ITGBL1, COL8A1, COL1A2, CEMIP, GAS1, ADAMTS2, PRDM6, MGP, CCN4, THBS1, PIK3R5, FN1, IGFBP3, DAB2, COL15A1, PLAU, COL12A1, RBMS1, COL4A1, C3AR1, NID2, LAMA2, SLC2A3, SULF1, CTHRC1, FMO2, GUCY1A1, LOX, FRMD6, CDH6, SOD2, SLC5A3, RARRES1, TIMP3, WWTR1, FSTL1, PRELP, EDNRA, CDH11, LPL, ALOX5, ADAM12, HAVCR2, TWIST1, GNB4, COL11A1, INHBA, GSDME, SNAI2, CMTM3, RIMKLB, PRRX1, GP…	C2	CGP	Up-regulated genes distinguishing between two subtypes of gastric cancer: advanced (AGC) and early (EGC).
PATEL_SKIN_OF_BODY_ZOSTAVAX_AGE_70_93YO_VZV_CHALLENGE_3DY_UP	5.32119e-06	0.000456089	0.610527	-0.416517	-2.07041	97	CENPH, ABI3BP, CTSB, LGMN, AOX1, CD180, EPB41L3, MS4A6A, DAB2, SERPINA3, TDRD12, SSR2, CLU, C3AR1, AIF1, GPSM3, LCP1, ARPC1B, C1RL, ITGAM, MYO5A, PTGER4, TYROBP, ACP5, CD84, GLIPR1, SAMSN1, IKBIP, CCR1, HMOX1, CLEC7A, PIK3AP1, CD86, FCER1G, SLC15A3, CAPRIN1, HAVCR2, NECTIN3, SDC2, RHOJ, MARCKS, SERPINA1, SRGN, NAGA, CD33, LY86, CTSZ, EVI2B, MPEG1, PAPSS2, RAB32, SLC38A6, CPVL	C7	VAX	Genes up-regulated in skin of body 3d vs 0hr in adults (70-93) (VZV challenge) after exposure to Zostavax , time point 3D
CEBPB_01	5.36579e-06	0.000458395	0.610527	-0.313713	-1.78341	226	SKIDA1, PAX8, MYRFL, ITGA5, ELMO3, TPM2, FAM91A1, BAHD1, C1S, CEPT1, GPX1, SIAH3, MYH7, EIF4A1, ERBB4, DCN, FLOT2, TUBB6, CDC42EP3, CHAC1, WNT6, MAP2K3, IL10, ZFYVE9, ALDOA, LMO4, GARS1, NDUFA4L2, MBNL1, SULF1, PLCB2, DUSP1, SCYL2, AP1G1, NADK, KLHL7, PCDH8, NFATC4, POLG, RCOR1, TSPAN5, KLF5, C3, IMPDH1, DLG2, FAM53C, VIT, GRM7, CLIP1, ETF1, CACNB1, NRP2, MCEMP1, BMF, PDAP1, CBX4, MARVELD1, ADGRG…	C3	TFT:TFT_Legacy	Genes having at least one occurrence of the motif RNRTKDNGMAAKNN in the regions spanning 4 kb centered on their transcription starting sites [-2kb, +2kb]. This matches the CEBPB [GeneSymbol=CEBPB] transcription factor binding site V$CEBPB_01 (v7.4 TRANSFAC).
GOBP_REGULATION_OF_INFLAMMATORY_RESPONSE	5.42708e-06	0.000462105	0.610527	-0.302733	-1.77266	279	CD47, GPS2, PIK3CG, TLR10, SERPINF1, NDFIP1, SPHK1, SOCS3, FCGR2B, APP, MFHAS1, CCN4, GPX1, HLA-DRB1, CEBPB, ANXA1, GRN, VAMP8, CCN3, CNR1, KARS1, SELE, IL10, PTGIS, IL1RL2, MAPK13, HCK, CST7, NINJ1, TNFRSF1B, IL18, NCF1, RHBDF2, GPSM3, MEFV, CCL5, NUPR1, TNFRSF1A, NLRP1, SYK, STING1, PTPRC, SOD1, AREL1, PTGER4, SAA1, CCL3, ACP5, CD200R1, PLCG2, AOAH, CASP4, IL16, NFKBIZ, HLA-E, C3, FOXF1, SNCA, …	C5	GO:BP	Any process that modulates the frequency, rate or extent of the inflammatory response, the immediate defensive reaction (by vertebrate tissue) to infection or injury caused by chemical or physical agents. [GOC:ai]
GSE36476_CTRL_VS_TSST_ACT_16H_MEMORY_CD4_TCELL_YOUNG_DN	5.54978e-06	0.000471004	0.610527	-0.348412	-1.91817	178	BATF3, PEA15, DHX32, METTL13, CYP1B1, CIAPIN1, BYSL, HSP90AB1, TIMM10, HLA-DRB1, TXN, PDCD11, RCN1, TUBB6, PMM2, IFI30, SND1, MAP3K14, GMPPB, MAPK13, RNF121, NIP7, TUBA1C, GARS1, SEPHS2, VCP, IER3, RFTN1, CCL4, IFNGR2, WDR3, TYROBP, BATF, PGAM1, DNAJB6, IL1R1, CD86, CTPS1, TPI1, PSMC4, CCT2, NQO1, ZWILCH, NUP62, MYOF, HILPDA, HSPA1A, ENO1, EBI3, IDH1	C7	IMMUNESIGDB	Genes down-regulated in comparison of untreated CD4 [GeneID=920] memory T cells from young donors versus those treated with TSST at 16 h.
BENPORATH_ES_WITH_H3K27ME3	5.81892e-06	0.000492113	0.610527	-0.226964	-1.47685	817	PAX8, PRLHR, CD47, BATF3, KCNV1, GABRA2, SLC32A1, SSBP4, NKPD1, CRLF1, LTBP2, APBA1, MADCAM1, LHX6, SLC10A4, SLC6A20, FBLN5, STX1A, PRUNE2, COL8A1, MED31, P2RX5, FXYD7, CEMIP, GABRB2, SLIT1, MLPH, SLC16A11, POLE, RYR3, HTR7, SORCS3, CYP26B1, GALNT18, OSR1, POMC, EPHA10, FZD2, PTGFR, DLX5, ADAMTS15, FOXC1, RASGEF1C, ADAM22, NT5C1A, HRK, TMEM59L, HPCAL4, SYT7, INA, NTN1, ERBB4, SECTM1, PLXNC1, NPTX…	C2	CGP	Set 'H3K27 bound': genes posessing the trimethylated H3K27 (H3K27me3) mark in their promoters in human embryonic stem cells, as identified by ChIP on chip.
HALLMARK_TNFA_SIGNALING_VIA_NFKB	5.83653e-06	0.000492113	0.610527	-0.343372	-1.90523	188	SPHK1, SOCS3, KLF2, YRDC, CEBPB, RNF19B, B4GALT1, B4GALT5, PLEK, GADD45B, JAG1, TNFAIP8, MAP2K3, NR4A3, PLAU, EFNA1, BTG1, MYC, BTG2, TNFAIP2, NINJ1, VEGFA, CEBPD, IL18, GEM, SLC2A3, DUSP1, CCL5, JUN, IER3, ZBTB10, CCL4, IFNGR2, KLF6, PTGER4, CCRL2, CCN1, SOD2, ATP2B1, PPP1R15A, CDKN1A, PTPRE, PLK2, PNRC1, FOSL2, BCL3, IER5, IRF1, PHLDA2, MAP3K8, PTX3, GCH1, PTGS2, BCL2A1, HES1, LAMB3, KYNU, GPR1…	H		Genes regulated by NF-kB in response to TNF [GeneID=7124].
GSE8835_HEALTHY_VS_CLL_CD8_TCELL_DN	5.98365e-06	0.000502879	0.610527	-0.34638	-1.90991	180	WHAMM, APOC2, SLPI, COL1A1, CRLF1, ANKRD37, MED31, COL1A2, FCGR2B, IL17RE, COL3A1, AMMECR1L, PPBP, QPCT, TGFBI, DCN, GCNT2, AQP9, CERS6, DMGDH, DKK2, LRMDA, CSF3, FAM43A, CD300LF, FYB1, OASL, TNFAIP2, COL4A1, VEGFA, ARL1, VPS36, MAN1A1, SLC2A3, LIMD2, CGGBP1, CNIH2, SKIL, ERO1A, MMP2, COQ8A, LUM, RNASET2, GREM2, AOAH, NFKBIZ, SDF4, BRINP1, SNCA, PPP1R15A, CPED1, CX3CL1, ZFP36L1, PER2	C7	IMMUNESIGDB	Genes down-regulated in CD8 T cells: healthy versus CLL (chronic lymphocytic leukemia).
GOBP_SENSORY_PERCEPTION_OF_SMELL	6.11772e-06	0.000512483	0.610527	0.458892	2.09431	90	OR2L13, OR2L2, OR2L5, OR2L3, OR2AK2, OR2M4, OR2L8, OR2M3, OR2M2, OR2M5, OR6V1, OR6X1, OR2B8P, OR2T4, SLC24A4, CNGA4, OR13J1, OR2C1, OR2AG1, OR2T33, OR3A3, OR2D2, OR13C4, NCAM2, OR2AG2, OR1L4, OR5C1, ADCY3, OR2H2, OR10A2	C5	GO:BP	The series of events required for an organism to receive an olfactory stimulus, convert it to a molecular signal, and recognize and characterize the signal. Olfaction involves the detection of chemical composition of an organism's ambient medium by chemoreceptors. This is a neurological process. [GOC:ai]
GSE11057_NAIVE_VS_MEMORY_CD4_TCELL_DN	6.15565e-06	0.000513997	0.610527	-0.343715	-1.88949	176	PEA15, PHACTR2, FAR2, JPT1, TPM4, HLA-DRB1, ANXA1, RNF19B, LPP, ATP2B4, PLXNC1, IQGAP2, CDC42EP3, CTSA, CLIC1, PTTG1, SMAP1, HNRNPLL, AKIRIN2, FBXL8, OGDH, GNAI2, NIBAN1, S100A4, VDAC1, CRIP1, TNFRSF1B, MYO1F, ANXA2, ACTB, SLC2A3, ARPC1B, S100A11, RFTN1, MYO5A, KLF6, FAS, ACVR1, TUBB4B, RAB11FIP1, NABP1, WEE1, CD84, NBEAL2, GLIPR1, YWHAH, DHRS7, CD74, ARHGAP35, MYL6, SUSD6, ATP2B1, HERPUD1, PDIA6…	C7	IMMUNESIGDB	Genes down-regulated in comparison of naive T cells versus memory T cells.
DESCARTES_FETAL_PLACENTA_IGFBP1_DKK1_POSITIVE_CELLS	6.52893e-06	0.000543412	0.610527	-0.431037	-2.08614	85	CRLF1, LRRN4CL, CYP1B1, GAS1, GGT5, PCSK1, CPXM1, SCARA5, IGFBP6, IGFBP4, ISLR, AOX1, MEDAG, RGS17, CNR1, C1R, IGFBP2, DIRAS2, CTSK, NPR3, IGSF10, CFD, OSGIN2, C11orf96, APOD, ING1, LUM, SSC5D, IL1RL1, CHI3L2, WNT5A, ENTPD3, LGALS1, IGFBP5, KCND2, MXRA8, RGS2, WNT4, MOV10L1, PARM1, COX7A1, S100A3, COL4A4, DKK1	C8		descartes DE_gene_by_organ.csv, fold.change>5, qval<0.05, pval<0.05
GSE27434_WT_VS_DNMT1_KO_TREG_DN	6.72496e-06	0.000557935	0.610527	-0.34465	-1.90037	180	PRNP, MADCAM1, COL1A2, SOCS3, CRABP2, FBLN2, RBM18, VCL, ATP6V1H, GADD45B, PROCR, TNFAIP8, FRRS1, KDELR3, IL10, UBE2N, MYC, BTG2, TNFAIP2, RAB3IL1, UTP4, SCAMP1, DUSP1, ANKRD28, PPP3CA, NUPR1, IL1RN, CASP4, NFKBIZ, LCP2, PPP1R15A, ATP13A3, CDKN1A, ETF1, CSNK1A1, IL1RL1, PAG1, ZFP36L1, DNAJB6, SPIN1, KCTD12, CD86, CTPS1, SLC20A1, GMFG, TOP1, B4GALT3, IRF1, UBE2D3, MAP3K8, PTGS2, KRAS, PTEN, CD14, …	C7	IMMUNESIGDB	Genes down-regulated in T reg: wildtype versus DNMT1 [GeneID=1786] knockout.
FULCHER_INFLAMMATORY_RESPONSE_LECTIN_VS_LPS_UP	6.94551e-06	0.000574392	0.610527	-0.25299	-1.5903	530	BATF3, ORAI1, PEA15, PIK3CG, PHACTR2, ZNF366, MPC2, CIAPIN1, TNFSF8, FAR2, JPT1, FCGR2B, TPMT, GGT5, HOPX, YRDC, AKR1C1, TIMM10, FXYD6, PDLIM4, NRP1, GPR35, LPP, BID, VCL, UXS1, FCGR1A, TOMM34, CD209, TUBB6, PDLIM7, GON7, SPINT1, FN1, PROCR, CERS6, SND1, NR4A3, ALOX15B, PLAU, HNRNPLL, PDPN, PLK3, TTC9C, PTDSS1, TMED3, NUDT4, ECM1, G3BP1, KCNN4, MAPK13, MAP2K6, SERINC2, SOX4, NIBAN1, COMMD7, BTG2,…	C2	CGP	Genes up-regulated in monocyte-derived dendritic cells (MDDC) after stimulation with galecin-1 (lectin, LGALS1) [GeneID=3956] compared to that with bacterial lipopolysaccharide (LPS).
GSE22886_NAIVE_BCELL_VS_DC_DN	7.19287e-06	0.000592953	0.610527	-0.33122	-1.84582	193	PEA15, TRPV2, JPT1, TPM4, QPCT, NRP1, BID, TGFBI, CITED2, SPINT1, PGD, EPB41L3, PSMD1, IFI30, ARRB2, GNS, PLAU, MRPL15, NIBAN1, SEPHS2, VDAC1, LST1, VCP, MAN1A1, TNFRSF1A, RAP2B, ITGAM, AREL1, TM9SF2, SAMSN1, YWHAH, MPV17, IMPDH1, HMOX1, DNAJB6, GPX3, CLEC7A, LRRC59, ANKRD17, PLEKHB2, TPI1, BLVRA, FCER1G, FCGRT, LRP12, ATP1B1, ECPAS, TOP1, GABARAPL1, HSPA1A, SMCO4, LGALS1, SDC2, TFG, RRP1B, PILRA…	C7	IMMUNESIGDB	Genes down-regulated in comparison of naive B cells versus unstimulated dendritic cells (DC).
GOBP_CYTOKINE_MEDIATED_SIGNALING_PATHWAY	7.31445e-06	0.000600363	0.610527	-0.274449	-1.65501	367	PLVAP, GPS2, LILRA4, CRLF1, STAT4, SPHK1, PAFAH1B1, IL17RE, FOXC1, HSP90AB1, LILRB5, PPBP, ADIPOR1, CCL19, GPR35, AGPAT2, STAT6, LEPR, CSF3, CD300LF, CD24, ECM1, EIF5A, KRT18, IL1RL2, GAS6, HCK, CCR9, COMMD7, OASL, IL27RA, IL12RB1, LAPTM5, TNFRSF1B, IL18, PRKACA, NKIRAS1, SP100, CCR5, TRAF2, CCL5, SPI1, H2BC11, TNFRSF1A, WBP1L, SYK, STING1, PTPRC, CCL4, IFNGR2, FAS, PTPN6, CSF3R, GHR, CCL3, CSF1R…	C5	GO:BP	A series of molecular signals initiated by the binding of a cytokine to a receptor on the surface of a cell, and ending with regulation of a downstream cellular process, e.g. transcription. [GOC:mah, GOC:signaling, PMID:19295629]
FULCHER_INFLAMMATORY_RESPONSE_LECTIN_VS_LPS_DN	7.32914e-06	0.000600363	0.610527	-0.269318	-1.64759	418	CTSV, PLEKHA2, PDE4C, SOCS3, CEMIP, TMEM241, TSPAN4, SIGLEC1, KLF2, MARCO, C1S, CFB, LGMN, SERPING1, CCL19, RNF19B, F13A1, ISG20, TGFBI, B4GALT5, FCGR1A, SECTM1, CITED2, GADD45B, MS4A6A, SLC35E1, JAML, GNS, IL10, APOBEC3C, CTSK, APOBEC3G, FGL2, RBMS1, FYB1, GAS6, CD300A, DNASE2, FAM20A, OASL, LTA4H, B3GNT2, SEPHS2, C3AR1, LST1, CD302, AIF1, CEBPD, PPA1, MAML2, IL18, NCF1, RHBDF2, PLEKHF2, NBN, SP…	C2	CGP	Genes down-regulated in monocyte-derived dendritic cells (MDDC) after stimulation with galecin-1 (lectin, LGALS1) [GeneID=3956] compared to that with bacterial lipopolysaccharide (LPS).
GOBP_VASCULATURE_DEVELOPMENT	7.35253e-06	0.000600379	0.610527	-0.243575	-1.54867	608	ZNF304, CTH, COL1A1, PIK3CG, SERPINF1, CYP1B1, CNMD, ITGA5, COL8A1, ACTA2, SPHK1, COL1A2, GJC1, SOCS3, FOXC2, KLF2, ALDH1A2, PDCD6, OSR1, ROCK2, RIC8A, COL3A1, KDR, FOXC1, COL18A1, B9D1, PPP3CB, ADAMTS1, GPX1, NRP1, THBS1, ANXA1, GRN, B4GALT1, ATP2B4, TGFBI, DCN, PTK7, CITED2, CCN3, SPINT1, JAG1, FN1, LEPR, MIA3, PIK3CB, COL15A1, IL10, BMP4, PDPN, PTGIS, CARD10, EFNA1, ECM1, BTG1, GJA5, SOX4, RUN…	C5	GO:BP	The process whose specific outcome is the progression of the vasculature over time, from its formation to the mature structure. The vasculature is an interconnected tubular multi-tissue structure that contains fluid that is actively transported around the organism. [GOC:dph, UBERON:0002409]
GOBP_POSITIVE_REGULATION_OF_GENE_EXPRESSION	7.61907e-06	0.000620188	0.610527	-0.219054	-1.43201	884	TRAPPC2B, PRKAB1, HABP4, PIK3CG, YTHDF1, EXOSC6, ACTG2, IMPACT, CYP1B1, SLC24A3, MARK1, NCK2, FXR2, ACTA2, SPHK1, EIF3C, WNT3, APP, ALDH1A2, RPL5, CYP26B1, RPS27L, OSR1, POMC, ROCK2, PTGFR, DLX5, FOXC1, CDK1, POLR3B, PLA2R1, CEBPB, CCL19, THBS1, ANXA1, AGPAT2, CD6, CITED2, ARFGEF2, STAT6, DAZAP1, VIP, GDF7, WNT6, C1QTNF1, FN1, KPNA6, TENT5B, PIK3CB, ARRB2, IL10, NR4A3, ALOX15B, BMP4, HNRNPLL, CNN…	C5	GO:BP	Any process that increases the frequency, rate or extent of gene expression. Gene expression is the process in which a gene's coding sequence is converted into a mature gene product (protein or RNA). [GOC:txnOH-2018]
BENPORATH_SUZ12_TARGETS	7.79999e-06	0.000632924	0.593325	-0.230596	-1.48773	726	PAX8, PRLHR, BATF3, KCNV1, GABRA2, SLC32A1, CRLF1, CRABP1, LTBP2, COCH, LHX6, SLC10A4, SLC6A20, CYP1B1, IGF2, CEMIP, SLIT1, EMX1, WNT3, POLE, RYR3, HTR7, SORCS3, CYP26B1, BMP3, GALNT18, HOPX, OSR1, POMC, EPHA10, FZD2, PTGFR, GPR158, YRDC, CFAP299, ADAMTS15, NT5C1A, HRK, TMEM59L, HPCAL4, NRP1, INA, SIAH3, NTN1, ERBB4, SECTM1, NPTX1, TMEM30B, TRIM9, PPM1E, SPTB, GDF7, WNT6, SLC12A5, FBXO3, CACNB4, …	C2	CGP	Set 'Suz12 targets': genes identified by ChIP on chip as targets of the Polycomb protein SUZ12 [GeneID=23512] in human embryonic stem cells.
WP_INFLAMMATORY_RESPONSE_PATHWAY	8.12067e-06	0.00065659	0.593325	-0.688888	-2.36404	21	COL1A1, COL1A2, COL3A1, THBS1, LAMC2, LAMC1, VTN, FN1, LAMB1, TNFRSF1B, TNFRSF1A	C2	CP:WIKIPATHWAYS	Inflammatory response pathway
ZHONG_RESPONSE_TO_AZACITIDINE_AND_TSA_UP	8.14237e-06	0.00065659	0.593325	-0.360115	-1.93559	150	HABP4, ATP6V1D, PARP12, CTSV, CDO1, LSR, IGF2, SPHK1, COL1A2, JPT1, PKP2, NPTX1, MAP2K3, IFI30, DUSP14, MAP3K14, KDELR3, PLK3, ECM1, STK10, TDRD12, CYP26A1, SEC61A2, MICA, RGS9, F11R, SKIL, H2BC5, JUN, PGF, CDKN2D, MMP2, LAT2, NRIP3, YKT6, KCNV2, CDKN1A, ABHD2, CLGN, MAP4K1, C3orf52, HCLS1, ARF4, SLC7A6, INPP5F, CAVIN1, AFF4, GCH1, ENO2, CLIC3, CYLD, IFFO1, APOLD1, GLS, TUBB2B, NMT2, ODC1, CLTB, …	C2	CGP	Genes up-regulated in 3 out of 4 NSCLC cell lines (non-small cell lung cancer) after treatment with azacitidine [PubChem=9444] and TSA [PubChem=5562].
GSE21360_NAIVE_VS_SECONDARY_MEMORY_CD8_TCELL_UP	8.27068e-06	0.000664865	0.593325	-0.352435	-1.92168	165	PIK3CG, ITGA5, BYSL, FCGR2B, CEBPB, LPP, VCL, TGFBI, PIK3R5, GADD45B, IGF2BP2, CSF3, TES, PDPN, HCK, LMO4, VEGFA, CD302, LRRC8C, LAMA2, MEFV, CCL5, IER3, MYO1B, FAS, LRRC25, TUBB4B, ADGRG6, RAB11FIP1, IL1RN, PRELID1, SOD2, AOAH, SAMSN1, C3, HERPUD1, PID1, RRAS, PGAM1, HK2, SLC39A14, BCL3, CEMIP2, HCLS1, GALNT2, KCTD12, IFITM2, FHL3, TPI1, ME1, GMFG, ABCC1, ETV5, PPP1R3B, PECAM1, RAB20, GPR85, TME…	C7	IMMUNESIGDB	Genes up-regulated in CD8 T cells: naïve versus 2' memory.
GOCC_VACUOLAR_LUMEN	8.38603e-06	0.000672051	0.593325	-0.361996	-1.94781	152	NAPRT, FMOD, CTSV, OGN, CTSB, LGMN, GRN, DCN, PSMD1, CTSA, IFI30, GNS, CSF3, NSG2, CTSK, TUBB, SERPINA3, VAT1, TCN2, RETN, VCP, ANXA2, ACTR2, HSPG2, HRNR, MNDA, TUBB4B, LUM, RNASET2, UNC13D, NPC2, C3, CD74, SGSH, ADA2, IMPDH1, GDI2, PPT1, HEXB, PRKCD, PRELP, SDCBP, CCT2, GUSB, PDGFRB, CTSC, SDC2, EPDR1, CTSD, ACLY, TTR, FAF2, ACAN, GPC6, CAP1, MAN2B1, PYCARD, TXNDC5, ASAH1, MAN2B2, FUCA1, HSPA8, …	C5	GO:CC	The volume enclosed within the vacuolar membrane. [ISBN:0198506732]
DESCARTES_FETAL_ADRENAL_MYELOID_CELLS	8.69132e-06	0.000694367	0.593325	-0.361937	-1.943	148	HLA-DQA1, HLA-DQB1, SIGLEC1, ADAM28, MARCO, LILRB5, LGMN, HLA-DRB1, FCGR1A, SECTM1, CD209, MS4A6A, IL10, CD300LF, HLA-DRA, SIRPB2, HCK, TLR6, FAM20A, CD300C, CFD, C3AR1, MEFV, CD163L1, PRAM1, SPI1, CYTH4, FGD2, CD68, IER3, LRRC25, FOLR2, MNDA, CSF1R, IL1RN, RNASET2, RGS1, MSLN, ADGRE1, CD4, FLT3, ADAP2, CCR1, HMOX1, HLA-DMB, MS4A14, CASP5, CLEC7A, CD86, NAIP, C1QA, C1QC, HRH1, CD14, C1QB, LILRB4,…	C8		descartes DE_gene_by_organ.csv, fold.change>5, qval<0.05, pval<0.05
GSE24634_IL4_VS_CTRL_TREATED_NAIVE_CD4_TCELL_DAY5_UP	8.86703e-06	0.000706225	0.593325	-0.343329	-1.88598	175	HLA-DQA1, HLA-DQB1, SERPINF1, SLC19A1, TSPAN4, TPM2, C1S, LGMN, CCL19, GPR35, F13A1, BID, LAMC1, GNA15, CD209, TUBB6, CTSA, MRC1, ATRN, ALOX15B, GAS6, HCK, VAT1, BLNK, TNFAIP2, NINJ1, CD302, TBXAS1, CD68, RAP2B, MYO5A, IRGQ, CSF1R, BLVRB, PLCG2, NPC2, YWHAH, TBC1D8, BASP1, LRRC42, PLK2, TMEM97, PLOD1, HLA-DMB, MMD, TMEM176B, IL1R1, CD86, AHCY, NAIP, ALOX5, PTGS1, OLFML2B, SFN, EBI3, TMEM176A, RAB…	C7	IMMUNESIGDB	Genes up-regulated in comparison of CD25- T cells treated with IL4 [GeneID=3565] at day 5 versus untreated CD25- T cells at day 5.
MODULE_33	9.01702e-06	0.000715968	0.593325	-0.290162	-1.70883	295	GSTM5, SLPI, FRZB, TAGLN, ITGA5, ACTA2, SLC19A1, TPM2, ASS1, MYL9, PCOLCE, FBLN2, TP53I11, HRK, PPBP, CHIT1, IGFBP6, LGMN, THBS1, CD6, MYH7, SGCA, SECTM1, PTK7, ELN, ADARB1, MLLT11, HMGCS1, OPRK1, CD24, FYB1, KRT18, C7, HCK, CPD, TCN2, EFTUD2, RUNX1, TNFAIP2, CFD, C3AR1, LST1, MAPK10, KAT5, CCL5, TNFRSF1A, HSPG2, CD27, STAB1, KCNMB1, UCHL1, ATF2, ACP5, CXCL12, MSLN, SOD2, C3, LMAN2, CORO1A, LTBP1…	C4	CM	Immune / stress response genes.
GOMF_STRUCTURAL_MOLECULE_ACTIVITY	9.12068e-06	0.000721984	0.593325	-0.251963	-1.57999	521	ANKRD2, MRPL37, RPS26, COL1A1, FMOD, SEC31B, LTBP2, MFAP4, FBLN5, DLG4, OGN, CMTM8, COL14A1, DSP, COL8A1, COL1A2, ABI3BP, MYH11, TPM2, MATN3, RPL5, THSD4, MYL9, UPK1B, RPS27L, TPM4, ROCK2, COL6A2, DES, PCOLCE, COL3A1, COL6A3, MRPL46, COL18A1, FBLN2, MGP, SORBS2, PSMD13, HLA-DRB1, THBS1, INA, LAMC2, VCL, TGFBI, DCN, LAMC1, VTN, TUBB6, ELN, SPTB, CRYGN, OBSCN, EPB41L3, JAG1, FN1, COL15A1, RPL23, AR…	C5	GO:MF	The action of a molecule that contributes to the structural integrity of a complex or its assembly within or outside a cell. [GOC:mah, GOC:vw]
GOBP_LYMPHOCYTE_MEDIATED_IMMUNITY	9.19992e-06	0.000726036	0.593325	-0.324732	-1.83658	215	HLA-DQA1, HLA-DQB1, EXOSC6, NDFIP1, CLEC2A, HLA-DRB5, FCGR2B, C1S, PPP3CB, HLA-DRB1, SERPING1, RNF19B, MR1, FCGR1A, STAT6, PVR, JAG1, C1R, ARRB2, IL10, HLA-DOB, TUBB, C2, HLA-DRA, VAV1, C7, IL27RA, IL12RB1, CLU, MICA, TNFRSF1B, IL18, NBN, TRAF2, CYRIB, AP1G1, ARL8B, RNF8, C1RL, RFTN1, CD27, HLA-B, PTPRC, PTPN6, TUBB4B, HLA-A, LGALS9, IL18R1, UNC13D, HFE, BATF, CADM1, HLA-E, MYO1G, C3, CD74, NCKAP…	C5	GO:BP	Any process involved in the carrying out of an immune response by a lymphocyte. [GO_REF:0000022, GOC:add, ISBN:0781735149]
IZADPANAH_STEM_CELL_ADIPOSE_VS_BONE_DN	9.39297e-06	0.000739018	0.593325	-0.4114	-2.04498	97	CISD1, SLPI, LTBP2, STAT4, MFAP4, SLC24A3, MYH11, GPR87, FAM234B, AKR1C1, CFB, SORBS2, SERPING1, ATP2B4, VCL, PPP4R4, SLC29A1, DAAM1, DAB2, NPR3, PTGIS, LAMB1, PPTC7, LOX, FBLN1, PODN, RGS4, PRKAG2, DHRS3, POSTN, TNNC1, CDH11, CCDC80	C2	CGP	Genes down-regulated in adipose tissue mesenchymal stem cells (ASC) vs bone marrow mesenchymal stem cells (rBMSC)
GSE2770_UNTREATED_VS_TGFB_AND_IL4_TREATED_ACT_CD4_TCELL_48H_DN	9.77451e-06	0.000766707	0.593325	-0.340288	-1.87497	181	PRNP, STAT4, MADCAM1, CDO1, AP3S2, BYSL, FAM13A, FCGR2B, VHL, PPIB, DLX5, KDR, PREP, IGFBP4, ARL6IP5, MCAT, EIF4A1, CITED2, LEPR, TNFAIP8, TUBB, CD24, HLA-DRA, CD300A, STK10, LTA4H, RHOH, SYK, CD53, LRPAP1, SPINT2, IL1RN, PLCG2, EIF3D, FLOT1, LCP2, SRGAP2, CDKN1A, XBP1, TPD52, HLA-DMB, CSF2RB, PER2, PAK5, CRYBG1, PSMA6, EIF4E2, PLEKHB2, ALOX5, ALOX5AP, ATP1B3, LHFPL2, ENO1, PSMG1, PIM1, CTSH, ETS…	C7	IMMUNESIGDB	Genes down-regulated in CD4 [GeneID=920] T cells: untreated (0h) versus activated by anti-CD3 and anti-CD28 and then stimulated by TGFB1 and IL4 [GeneID=7040;3565] (48h).
SATO_SILENCED_BY_METHYLATION_IN_PANCREATIC_CANCER_1	9.88657e-06	0.000772336	0.593325	-0.283955	-1.6862	318	APOC2, TRPV2, CDO1, LHX6, SERPINF1, CYP1B1, IGF2, CLIP3, CIITA, HERC3, ADAM28, CRABP2, CYP26B1, PRMT7, SVIL, COL6A3, TP53I11, QPCT, CCL19, MR1, SLC9A5, CD180, ISG20, VTN, NPTX1, RGS17, SPINT1, CHAC1, IGFBP3, PROCR, LHFPL6, IL32, OPRK1, TES, APOBR, TRIM36, DEPP1, PI4K2A, IL1RL2, RAB6A, NEDD4L, PDYN, LAPTM5, SLC16A4, RCN3, CCL5, F11R, COPZ2, GYPC, ZNF165, IER3, PGF, HLA-B, CCL4, STXBP2, UCHL1, SNAP…	C2	CGP	Genes up-regulated in the pancreatic cancer cell lines (AsPC1, Hs766T, MiaPaCa2, Panc1) but not in the non-neoplastic cells (HPDE) by decitabine (5-aza-2'-deoxycytidine) [PubChem=451668].
GOBP_MYELOID_LEUKOCYTE_ACTIVATION	9.90595e-06	0.000772336	0.593325	-0.338187	-1.87118	185	BATF3, PIK3CG, SPHK1, FCGR2B, APP, MFHAS1, THBS1, ANXA1, GRN, VAMP8, FN1, CNR1, KARS1, IL10, NR4A3, CD300LF, LTBR, CD300A, TLR6, CST7, CLU, AIF1, IL18, CCL5, DOCK2, PRAM1, SPI1, JUN, RHOH, SYK, PTPRC, ITGAM, IFNGR2, STXBP2, PTPN6, TYROBP, CCL3, LGALS9, UNC13D, PLCG2, LAT2, CD84, BATF, FOXF1, CD74, SNCA, LCP2, S100A12, PRKCD, HMOX1, CX3CL1, IL1RL1, WNT5A, FCER1G, C1QA, PJA2, CTSC, PTGDS, LYN, HAVC…	C5	GO:BP	A change in the morphology or behavior of a myeloid leukocyte resulting from exposure to an activating factor such as a cellular or soluble ligand. [GOC:add, ISBN:0781735149]
GOBP_REGULATION_OF_LYMPHOCYTE_ACTIVATION	9.99859e-06	0.000777218	0.593325	-0.273778	-1.65396	372	CD47, PRNP, HLA-DQA1, SLC39A10, HLA-DQB1, ARG2, EXOSC6, NDFIP1, IGF2, NCK2, TNFSF8, HLA-DRB5, FCGR2B, CYP26B1, PRKAR1A, HLA-DRB1, CEBPB, CCL19, ANXA1, CD6, TNFRSF21, FLOT2, CD209, STAT6, IGFBP2, IL10, HLA-DOB, BMP4, FGL2, CD24, DPP4, HLA-DRA, VAV1, IL1RL2, GAS6, CD300A, SOX4, RUNX1, EFNB3, IL27RA, IL12RB1, LST1, VNN1, AIF1, MICA, LAPTM5, TNFRSF1B, IL18, CYRIB, CCL5, RPS3, AP1G1, PRKDC, RHOH, CD27…	C5	GO:BP	Any process that modulates the frequency, rate or extent of lymphocyte activation. [GOC:ai]
ASTON_MAJOR_DEPRESSIVE_DISORDER_DN	1.03776e-05	0.000804268	0.593325	0.392379	1.9476	149	AMD1, FGFR2, WWP1, PRKCQ, RBM8A, BBX, LPAR1, TMEM63A, ABCA8, FRMD4B, ABCA2, MOBP, LDB3, CRYAB, MCM7, CADM4, PDE8A, CDK18, MYO1E, ASPA, KIF13B, EVI2A, FAM53B, PPP2R3A, TMEM87A, JAM3, HSPA2, PPFIBP2, CAPN3, SNRPE, CRYBG3, GPRC5B, PTP4A2, PMP22, CNP, MTMR2, MAPT, ENOSF1, PALM2AKAP2, KIF1B, TF, P2RX7, LIPE, KIF2A, BIN1, MAL, KLK6, NKX2-2, ZKSCAN1, GPR37, SS18, MOG, DICER1, ZFP36L2, DFFA, MYO9B, PDE6B…	C2	CGP	Genes down-regulated in the temporal cortex samples from patients with major depressive disorder.
LI_PBMC_MENACTRA_AGE_18_45YO_ANTI_POLYSACCHARIDE_ANTIBODY_CORRELATION_PROFILE_3DY_UP	1.09829e-05	0.000848636	0.593325	-0.634215	-2.35458	27	GPX1, SERPING1, C1R, APOBR, C2, CFD, C3AR1, AIF1, TYROBP, CCRL2, FGF5, C3, TBC1D8, FCER1G, C1QA, PTX3, C1QB, ST14, CFI, CXCL8	C7	VAX	Genes up-regulated in peripheral blood mononuclear cell 3d vs 0d in adults (18-45) (anti-polysaccharide antibody-correlation profile) after exposure to Menactra , time point 3D
REACTOME_PRE_NOTCH_EXPRESSION_AND_PROCESSING	1.11331e-05	0.000857682	0.593325	0.433191	2.0137	100	H2AC4, H3C3, H2BC3, H4C2, H2BC9, H2BC7, H3C7, H3C2, AGO4, AGO1, AGO3, FURIN, MAML3, H2AX, H2BC17, TNRC6C, H2AC14, H4C13, H3C8, LFNG, ST3GAL4, ATP2A1, H3C11, H4C14	C2	CP:REACTOME	Pre-NOTCH Expression and Processing
MODULE_64	1.13124e-05	0.000868905	0.593325	-0.262437	-1.59526	390	KCNN1, CRLF1, STAT4, FRZB, OGN, IGF2, FGFR1, HLA-DRB5, TSPAN4, HTR7, PPBP, SLC22A6, NRP1, CCL19, ANXA1, GRN, CD6, TNFRSF21, FCGR1A, GNA15, CCN3, GRB14, JAG1, AQP9, CNR1, LEPR, MRC1, OPRK1, CSF3, PDPN, NPR3, HLA-DRA, KCNN4, SLA, HTR2A, CCR9, IL27RA, CD300C, PTPRM, PDYN, C3AR1, HPS1, LAPTM5, TNFRSF1B, SLC16A4, CCR5, GYPC, CRHR2, ROR2, PTPRC, CCL4, ITGAM, CD53, THBD, CHRNA7, FAS, FCGR2A, FOLR2, CEAC…	C4	CM	Membranal receptors.
GSE2405_HEAT_KILLED_LYSATE_VS_LIVE_A_PHAGOCYTOPHILUM_STIM_NEUTROPHIL_24H_UP	1.13568e-05	0.000869736	0.593325	-0.333058	-1.84328	186	PRNP, HLA-DQA1, ACTG2, TAGLN, IRF6, MYH11, TPM2, SCG5, GALNT18, MGP, PLAGL1, GPX1, ANXA1, RNF19B, GRN, LAMC2, VCL, PLEK, CDC42EP3, GADD45B, FN1, IGFBP3, IFI30, PLD4, GNS, TTC39A, C2, S100A4, TNFAIP2, COL4A2, CLU, ANXA2, CCL5, APLP2, COPZ2, CD68, CSF1R, HFE, CASP4, C3, HEXB, NRP2, MAP3K20, IRF8, HSPA1B, P2RX4, LRRK1, CLEC7A, CD86, CTBP2, CSTB, FCER1G, TMEM51, ABCC1, IFITM3, ESRP1, ASNS, BCL2A1, HL…	C7	IMMUNESIGDB	Genes up-regulated in polymorphonuclear leukocytes (24h): treated by heat killed HC60 cell (promyelocytic leukemia) lysate versus A. phagocytophilum infection.
GOBP_POSITIVE_REGULATION_OF_LEUKOCYTE_CELL_CELL_ADHESION	1.19683e-05	0.000913863	0.593325	-0.325582	-1.81849	198	CD47, HLA-DQA1, HLA-DQB1, IGF2, NCK2, HLA-DRB5, HLA-DRB1, CCL19, ANXA1, CD6, FLOT2, CD209, IGFBP2, SELE, HLA-DOB, NR4A3, CD24, DPP4, HLA-DRA, VAV1, IL1RL2, SOX4, RUNX1, EFNB3, IL27RA, IL12RB1, VNN1, AIF1, IL18, CYRIB, CCL5, RPS3, RHOH, CD27, SYK, PTPRC, PTPN6, HLA-A, LGALS9, CCDC88B, NFKBIZ, HLA-E, CD4, CD74, NCKAP1L, IL4I1, CORO1A, ADAM8, XBP1, HLA-DMB, RASAL3, CD86, ALOX5, MAP3K8, DOCK8, MDK, C…	C5	GO:BP	Any process that activates or increases the frequency, rate or extent of leukocyte cell-cell adhesion. [GO_REF:0000058, GOC:BHF, GOC:rl, GOC:TermGenie, PMID:21106532]
GOCC_PLATELET_ALPHA_GRANULE_LUMEN	1.21e-05	0.000921202	0.593325	-0.508795	-2.21983	52	IGF2, APP, PPBP, SERPING1, THBS1, ISLR, F13A1, FN1, GAS6, SERPINA3, ALDOA, CFD, CLU, VEGFA, CYRIB, MMRN1, PCYOX1L, ACTN1, FERMT3, OLA1, PDGFB, SERPINA1, SRGN, PROS1, TGFB1, TEX264, SERPINE1, KNG1	C5	GO:CC	The volume enclosed by the membrane of the platelet alpha granule. [GOC:mah, PMID:8467233]
GOCC_COATED_VESICLE_MEMBRANE	1.24724e-05	0.000946768	0.593325	-0.354208	-1.90675	153	HLA-DQA1, SCYL1, HLA-DQB1, SEC31B, SLC32A1, HLA-DRB5, CEMIP, PDCD6, FZD2, RAB3A, HLA-DRB1, VAMP8, FCGR1A, DAB2, KDELR3, KDELR2, COPZ1, TMED3, HLA-DRA, GRIA1, STX5, M6PR, SEC13, COPA, COPZ2, CNIH2, AP1G1, ROR2, HLA-B, AP2S1, HLA-A, TYRP1, HLA-E, CD4, CD74, SEC24D, AP2M1, IGF2R, AP2B1, GAD1, CLINT1, DBNL, WNT5A, COPG1, RAB35, FOLR1, TGOLN2, AP1S1, ADRB2, CLTC, SYT1, TMED2, KDELR1, SEC31A, IL7R, PEF…	C5	GO:CC	The lipid bilayer surrounding a coated vesicle. [GOC:mah]
GSE2585_AIRE_KO_VS_WT_CD80_LOW_MTEC_UP	1.25173e-05	0.000947399	0.593325	-0.357816	-1.91879	147	VPS33B, NUDT21, EIF2B3, GABRB2, FKBP9, EPCAM, OLFML2A, DCAF1, DDX6, CYP2C8, AURKC, ADIPOR1, RNF19B, TNFRSF21, AQP9, H3C6, PTPRT, CD300A, LTA4H, UAP1, CST7, VEGFA, SCAMP1, JUN, CCL4, KLHL7, MNDA, SLC7A2, SULT1C2, PRKAR2A, CCZ1, FLOT1, ATP2B1, LGALS8, LRRC42, PGAM1, IL1RL1, ZNF177, SPTLC3, KLK7, SLC27A2, RUBCNL, ESRP1, EHD2, LRRC61, PSMD2, PSMB7, CD33, NFIL3, RCAN2, BTF3, BAG4, TANC2, NPAS2, OPCML,…	C7	IMMUNESIGDB	Genes up-regulated in medullary thymic epithelial cells (mTEC) with CD80 [GeneID=941] low: AIRE [GeneID=326] knockout versus wildtype.
GSE22140_GERMFREE_VS_SPF_MOUSE_CD4_TCELL_DN	1.26547e-05	0.000955005	0.593325	-0.332494	-1.84016	186	LTBP2, TNFSF8, MYO7A, LGMN, THBS1, BID, CD180, EIF4A1, TGFBI, GNA15, ERGIC3, DAB2, MRC1, CLIC1, ARRB2, APOBEC3C, CTSK, PI4K2A, STK10, OASL, S100A4, CD300C, VDAC1, CRIP1, BLMH, TNFRSF1B, ANXA2, YWHAZ, APLP2, IER3, PRPF4, STAB1, CCL4, CCL3, CSF1R, ACP5, BLVRB, SLC3A2, RGS1, YWHAH, SGSH, AP2M1, TPD52L2, PPP1R15A, PDIA6, CALM1, XBP1, P2RX4, RPN1, IFITM2, SLC16A3, RAB35, CCT2, SH3GL1, NQO1, EMP3, NOTC…	C7	IMMUNESIGDB	Genes down-regulated in healthy CD4 [GeneID=920] T cells: germ free versus specific pathogen free.
GOBP_PHAGOCYTOSIS	1.34382e-05	0.00101118	0.593325	-0.322006	-1.80849	205	CD47, SPHK1, PAK1, ELMO3, FCGR2B, MARCO, MYO7A, SYT7, THBS1, ANXA1, FCGR1A, ANXA11, PIKFYVE, LEPR, CAMK1D, PLD4, CNN2, CD300LF, C2, VAV1, TUSC2, GAS6, CD300A, HCK, CD302, AIF1, DOCK2, ARL8B, RHOH, SYK, ARHGAP25, PTPRC, ITGAM, BIN2, SOD1, CEACAM4, TYROBP, ITGAL, UNC13D, ICAM5, PLCG2, MYO1G, C3, OLFM4, NCKAP1L, LMAN2, RACK1, CORO1A, PRKCD, IRF8, RUBCN, SH3BP1, CLEC7A, FCER1G, CALR, ITGB3, TGM2, PTX…	C5	GO:BP	A vesicle-mediated transport process that results in the engulfment of external particulate material by phagocytes and their delivery to the lysosome. The particles are initially contained within phagocytic vacuoles (phagosomes), which then fuse with primary lysosomes to effect digestion of the particles. [ISBN:0198506732]
FLETCHER_PBMC_BCG_10W_INFANT_PPD_STIMULATED_VS_UNSTIMULATED_10W_UP	1.39694e-05	0.00104811	0.593325	-0.452127	-2.11362	70	CEMIP, THBS1, CHAC1, EPB41L3, AQP9, CSF3, GBP1, IER3, CCL4, THBD, CCL3, RNF144B, SOD2, BATF, NFKBIZ, ATP2B1, GBP2, AKR1C2, PHLDA2, MTHFD1L, MAP3K8, PTX3, PTGS2, EBI3, PIM1, BCL2A1, MARCKS, CXCL5, SERPINA1, INHBA, DUSP5, SESN2, C2CD4B, MMP14, CXCL8, OSM, CXCL2, IL6	C7	VAX	Genes up-regulated in peripheral blood mononuclear cell stimulated vs unstimulated in infants (10w) after exposure to BCG (Danish strain BCG Statens Serum Institut, Denmark) , time point 10W. Comment: PBMCs drawn at 10 weeks following immunization at birth
SWEET_KRAS_ONCOGENIC_SIGNATURE	1.40586e-05	0.00105176	0.593325	-0.441179	-2.11965	82	HLA-DQA1, GLRX, MYH7, TGFBI, LAMC1, CITED2, MRC1, SND1, GNS, BTG1, KRT18, IL18, MAN1A1, NPR2, CD68, ITGAM, FCGR2A, MDFI, GFUS, NPC2, RACK1, CDKN1A, PCBD1, ATP1B1, PHLDA2, TGOLN2, BOP1, MANF, RPL14, ACLY, KDELR1, GADD45A, VASP, EIF3E, NMT1, RPS2, DUSP6, RPL6, FEZ2, RPL8	C2	CGP	Genes that contributed maximally to the GSEA score of the up-regulated gene set from the KrasLA mouse model in two human lung cancer expression data sets comparing mutant vs normal KRAS [GeneID=3845].
DURANTE_ADULT_OLFACTORY_NEUROEPITHELIUM_NK_CELLS	1.41405e-05	0.00105483	0.593325	-0.441442	-2.09337	75	GNLY, HOPX, PFN1, PLEK, HCST, MATK, IL32, APOBEC3G, CST7, MYO1F, CYRIB, LIMD2, CCL5, LCP1, HLA-B, PTPRC, CCL4, BIN2, CD53, TYROBP, TRAF3IP3, PLAAT4, CCL3, HLA-A, MYL12A, CORO1A, ARHGDIB, CD48, IFITM2, FCER1G, EMP3, LSP1, CCL4L2, PTGDS, CLIC3, CXCR4, CD7, UCP2, SRGN, RAC2	C8
GOBP_NEUTROPHIL_MIGRATION	1.44338e-05	0.00107362	0.593325	-0.419857	-2.04671	88	PIK3CG, PPIB, MCU, PPBP, CCL19, PIKFYVE, CAMK1D, JAML, DPP4, VAV1, C3AR1, CCL5, RHOH, SYK, CCL4, GBF1, CSF3R, SAA1, CCL3, OLFM4, CD74, NCKAP1L, S100A12, ADAM8, CX3CL1, IL1R1, FCER1G, MDK, PECAM1, CXCL5, RAC2, RIPOR2, CD177, CXCR1, SLIT2, SLAMF8, CXCR2, CCL3L3, CXCL8, WDR1, MYD88, TREM1, CCL21, CXCL2, S100A8, EDN3	C5	GO:BP	The movement of a neutrophil within or between different tissues and organs of the body. [PMID:1826836]
WINTER_HYPOXIA_METAGENE	1.45537e-05	0.00107943	0.593325	-0.320046	-1.79428	204	BATF3, HLA-DQB1, IGF2, ITGA5, IRF6, HERC3, GLRX, KDR, CDK1, TXN, SYT7, THBS1, ANXA1, TBPL1, TGFBI, CITED2, TIMM17A, FN1, IGFBP3, IGFBP2, PLAU, EFNA1, BTG1, KRT18, ALDOA, CCT6A, VEGFA, ANXA2, SLC2A3, LOX, HK1, JUN, PGF, NOS3, MMP2, HAP1, ZNRD2, PGM1, SLC3A2, PKM, HERPUD1, CDKN1A, KRT19, HMOX1, PDGFB, TPD52, PGAM1, HK2, GBE1, TPI1, SLC20A1, LDHA, PTGS1, TGM2, HSPA5, HILPDA, PTGS2, ENO1, TPBG, PIM1,…	C2	CGP	Genes regulated by hypoxia, based on literature searches.
SEAVEY_EPITHELIOID_HEMANGIOENDOTHELIOMA	1.46805e-05	0.00108573	0.593325	-0.440047	-2.09862	78	ANKRD2, KCNV1, FMOD, COL8A1, FOXC2, UPK1B, TRIM58, PDLIM4, TNFRSF21, BMP4, NUDT4, ERAP2, OSGIN2, MMRN1, NEXN, BMP6, WTIP, CCN1, FOXF1, MMP19, LTBP1, TNFRSF12A, ITGA3, LATS2, CDC42EP5, KIF26B, C12orf75, EHD2, SCARF2, TINAGL1	C2	CGP	"Genes overexpressed in Epithelioid Hemangioendothelioma versus Angiosarcoma, Kaposi Sarcoma, Hemangioblastoma, and Liver"
AIZARANI_LIVER_C32_MVECS_3	1.47408e-05	0.00108708	0.593325	-0.381236	-1.9712	122	FGFR1, SOCS3, KLF2, FCGR2B, APP, FOXC1, INMT, FBLN2, NTN4, SELE, IL32, PTGIS, C7, TMSB10, NR2F2, CEBPD, PRSS23, C11orf96, HLA-B, NOS3, THBD, ADGRG6, HLA-A, MMRN2, NFKBIZ, HLA-E, TIMP3, SNTB2, IFITM1, ACTN1, WWTR1, NRP2, TFPI, IL1R1, PDLIM1, PTGS1, TGM2, IFITM3, KRAS, PTGDS, PECAM1, SPRY1, IFI27, IRAK3, APOLD1, CRIM1, VCAM1, WARS1, PARP14, ENG, B2M, IGFBP7, TAL1, HDAC7, BST2, AKAP12, PDE2A	C8
MEISSNER_NPC_HCP_WITH_H3K4ME2	1.52058e-05	0.00111819	0.593325	-0.259344	-1.59252	437	BATF3, HAPLN4, PARP12, ARHGAP28, SLC32A1, CRLF1, PLEKHA2, SRSF12, CREG2, LSR, N4BP3, SLC16A12, CYP46A1, EPCAM, TC2N, AGBL4, CASD1, PRKG2, BMP3, MTUS2, CPXM1, MFHAS1, GIPC3, COL18A1, FBLN2, PLAGL1, PKP2, GDF10, CEBPB, CPXM2, ADAM23, MYO1C, KCNQ4, GDF7, MATK, EPB41L3, TENT5B, LTK, DIRAS2, TES, TTC39A, CARD10, COL12A1, SEMA3F, GAS6, FAM20A, DLEU7, HPS1, GDA, ANXA2, NPR2, CYRIB, MPG, COPZ2, CNIH2, LO…	C2	CGP	Genes with high-CpG-density promoters (HCP) bearing histone H3 dimethylation mark at K4 (H3K4me2) in neural precursor cells (NPC).
ZHONG_SECRETOME_OF_LUNG_CANCER_AND_FIBROBLAST	1.56331e-05	0.00114636	0.57561	-0.379534	-1.95853	120	COL1A1, ACTA2, GOT1, APP, PSMA7, ITIH2, CTSB, COL18A1, HSP90AB1, CFB, VCL, YWHAB, FN1, PSMB3, C2, ECM1, ALDOA, CLU, VCP, ACTB, YWHAZ, ARHGDIA, MSLN, LXN, NPC2, YWHAH, PKM, ACTN1, RACK1, RAN, PSMA1, CX3CL1, TPI1, ME1, LDHA, CALR, TNXB, ENO1, SEMA3C, NUCB1, AKR1B1, TINAGL1, P4HB, CTSD, LGALS3BP, PSMB4, MDH2, GSTO1, CTSZ, VCAM1, HSP90B1, PSMB5, FUCA1, WDR1, RPL10A, GSR, PEBP1, SPARC	C2	CGP	Proteins secreted in co-culture of LKR-13 tumor cells (non-small cell lung cancer, NSCLC) and MLg stroma cells (fibroblasts).
MODULE_23	1.6122e-05	0.00117886	0.57561	-0.256638	-1.57712	441	APOC2, RPS26, SLPI, COL1A1, STX1A, IGF2, EIF4EBP1, ITGBL1, ITGA5, CD151, NPFF, GOT1, ALDH1B1, ADH1B, GLRX, HTR7, MYL9, CYP2C8, PCOLCE, ITIH2, C1S, AKR1C1, COL18A1, MGP, CFB, SORBS2, LGMN, IGFBP4, AGPAT2, AOX1, SLC38A10, ATP2B4, TGFBI, F10, CITED2, VTN, CYP2E1, ELN, GADD45B, CYB5A, FN1, AQP9, IGFBP3, PROCR, H3C6, MAP2K3, IGFBP2, SELE, NNMT, IL32, PLK3, CLEC3B, EFNA1, C2, ECM1, KRT18, LTBR, HTR2A, …	C4	CM	Liver genes - metabolism and xenobiotics.
ZHONG_SECRETOME_OF_LUNG_CANCER_AND_MACROPHAGE	1.62368e-05	0.00118392	0.57561	-0.44554	-2.09083	71	CTSV, GOT1, APP, PSMA7, PPIB, ITIH2, CTSB, COL18A1, HSP90AB1, CFB, IGFBP4, FN1, CTSA, C2, ALDOA, CLU, ANXA2, ACTB, YWHAZ, MSLN, NPC2, RACK1, RAN, CX3CL1, PSMA6, TPI1, LDHA, ENO1, CTSD, CTSH, PSMB7, LGALS3BP, MDH2, GSTO1, VCAM1, AKR1A1, PSMB5, RPL10A, PEBP1	C2	CGP	Proteins secreted in co-culture of LKR-13 tumor cells (non-small cell lung cancer, NSCLC) and MHS stroma cells (macrophages).
DURANTE_ADULT_OLFACTORY_NEUROEPITHELIUM_MONOCYTES	1.66682e-05	0.00121195	0.57561	-0.564627	-2.27633	37	HLA-DQA1, HLA-DQB1, HLA-DRB5, HLA-DRB1, MS4A6A, IFI30, FGL2, HLA-DRA, PHACTR1, RGS10, LST1, AIF1, MNDA, TYROBP, CCL3, RGS1, CD74, HERPUD1, HLA-DMB, FCER1G, C1QA, C1QC, CCL4L2, C1QB, GPR183, CD83, SRGN	C8
SRF_01	1.68643e-05	0.00122278	0.57561	-0.546526	-2.25694	41	ACTG2, PRUNE2, MYH11, THBS1, PFN1, VCL, TGFB1I1, SUSD1, CNN2, KCNMB1, MUS81, TPM1, NPAS4, MYL6, ACTN1, SLC25A4, TNNC1, ACTR3, EGR4, JUNB, IER2, FOS, FOSL1, EGR3, CAP1	C3	TFT:TFT_Legacy	Genes having at least one occurrence of the motif ATGCCCATATATGGWNNT in the regions spanning 4 kb centered on their transcription starting sites [-2kb, +2kb]. This matches the SRF [GeneSymbol=SRF] transcription factor binding site V$SRF_01 (v7.4 TRANSFAC).
GSE3039_CD4_TCELL_VS_B1_BCELL_DN	1.72152e-05	0.00124182	0.57561	-0.33847	-1.86285	177	GSTM5, GSTO2, CD47, SLPI, ARG2, CTSV, AP3S1, SRSF12, SPHK1, FOXC2, GLRX, CTSB, KIAA0319L, ADIPOR1, CEBPB, MR1, PFN1, CD180, F10, TNFAIP8, LRMDA, CTSK, BTG1, EIF5A, CD300C, DLEU7, CD302, MEFV, CYRIB, IER3, PABPC1L, RAP2B, CCL4, CD53, CSF3R, TYROBP, MCAM, MYL12B, IL1RN, MORN5, SOD2, LY6E, RARRES1, SGSH, CCR1, SDCBP, TPD52, DNASE2B, CLEC7A, PIK3AP1, FCER1G	C7	IMMUNESIGDB	Genes down-regulated in CD4 [GeneID=920] T cells versus B1 B lymphocytes.
BERENJENO_TRANSFORMED_BY_RHOA_DN	1.72229e-05	0.00124182	0.57561	-0.268605	-1.6252	375	CD47, PRNP, COL1A1, SSBP4, AP3S1, CDO1, MPC2, NDFIP1, CYP1B1, OGN, FGFR1, COL1A2, FAM8A1, FKBP9, GAS1, LMO7, COL6A2, PCOLCE, COL6A3, MGP, TBX15, AOC3, RAB3D, GRN, ISLR, SESN1, TSPYL4, ADAM23, DCN, RCN1, CYB5A, FN1, ERGIC3, CTSA, C1R, SND1, HMGCS1, NNMT, KDELR3, GNS, NPR3, CD24, DKK3, TMED3, MKRN1, SEMA3F, GAS6, GNAI2, GSTM3, TLR6, STX5, IGSF10, PTPRM, RASA4, ACTB, LAMA2, TLE5, APLP2, COPZ2, PPP3C…	C2	CGP	Genes down-regulated in NIH3T3 cells (fibroblasts) transformed by expression of contitutively active (Q63L) form of RHOA [GeneID=387] off plasmid vector.
GOCC_COATED_VESICLE	1.75885e-05	0.00126466	0.57561	-0.296482	-1.71662	255	CCDC115, HLA-DQA1, VPS33B, SCYL1, HLA-DQB1, SEC31B, SLC32A1, HLA-DRB5, CEMIP, APP, PDCD6, RAB27B, FZD2, RAB8B, RAB3A, HLA-DRB1, VAMP8, FCGR1A, CPNE6, ERGIC3, DAB2, KDELR3, KDELR2, COPZ1, DENND1C, TMED3, HLA-DRA, GRIA1, STX5, YIF1B, HEATR5B, M6PR, SEC13, SCAMP1, COPA, COPZ2, SCYL2, CNIH2, AP1G1, ROR2, HLA-B, AP2S1, HLA-A, STEAP2, UNC13D, TYRP1, HLA-E, CD4, CD74, SEC24D, LMAN2, AP2M1, IGF2R, AP2B1,…	C5	GO:CC	Small membrane-bounded organelle formed by pinching off of a coated region of membrane. Some coats are made of clathrin, whereas others are made from other proteins. [ISBN:0815316194]
RUBENSTEIN_SKELETAL_MUSCLE_PERICYTES	1.82448e-05	0.00130822	0.57561	-0.366326	-1.92236	131	TAGLN, COX6B1, ACTA2, CD151, TPM2, MYL9, COL6A2, COL3A1, COL6A3, SERPING1, TNFRSF21, YWHAB, CAVIN3, LHFPL6, GAS6, ALDOA, NDUFA4L2, COL4A2, COL4A1, NR2F2, CRIP1, EIF3K, SKP1, TPM1, SOD1, MYO1B, MCAM, EGFLAM, CXCL12, TIMP3, PTMS, ARHGDIB, CHCHD10, TFPI, TPI1, LPL, PDLIM1, PDGFRB, EPS8, NOTCH3, IFITM3, HES1, GAPDH, LGALS1, ISYNA1, TINAGL1	C8
GOBP_POSITIVE_REGULATION_OF_IMMUNE_RESPONSE	1.8828e-05	0.0013426	0.57561	-0.266496	-1.61794	386	CD47, GPS2, PRNP, SLC39A10, HLA-DQB1, EXOSC6, MFAP4, COCH, EIF2B3, PAK1, FCGR2B, C1S, CFB, HLA-DRB1, SERPING1, POLR3B, CCL19, ANXA1, MR1, VAMP8, TNFRSF21, STAT6, PVR, CNR1, KARS1, C1R, IL10, NR4A3, UBE2N, C2, HLA-DRA, AKIRIN2, VAV1, KCNN4, FYB1, C7, CD300A, HCK, BLNK, IL27RA, IL12RB1, CFD, CLU, C3AR1, CFH, LAPTM5, IL18, TRAF2, CYRIB, GBP1, CCL5, RPS3, TRIM5, PRAM1, SPI1, AP1G1, C1RL, PRKDC, RFTN1…	C5	GO:BP	Any process that activates or increases the frequency, rate or extent of the immune response, the immunological reaction of an organism to an immunogenic stimulus. [GOC:ai]
ONDER_CDH1_TARGETS_2_DN	1.8828e-05	0.0013426	0.57561	-0.27049	-1.63737	376	SLPI, PARP12, ARG2, CTSV, MARK1, LSR, DSP, P2RX5, IRF6, CYP1A1, ELMO3, EPCAM, GPR87, RAB25, TSPAN13, AKR1C1, SLC12A8, QPCT, ANO1, LAMC2, ATP2B4, ISG20, TNFRSF21, GNA15, TMEM30B, SPINT1, GRB14, TFCP2L1, IFI30, CSF3, HLA-DOB, ALOX15B, PLAU, PDPN, CD24, DEPP1, EFNA1, KCNN4, KRT18, SEMA3F, MAPK13, SERPINA3, IL18, NMU, RHBDF2, SLC2A3, F11R, ZNF165, IER3, SYK, ARHGAP25, B4GALT4, THBD, MYO1B, KCNG1, DAP…	C2	CGP	Genes down-regulated in HMLE cells (immortalized nontransformed mammary epithelium) after E-cadhedrin (CDH1) [GeneID=999] knockdown by RNAi.
GSE6269_E_COLI_VS_STAPH_AUREUS_INF_PBMC_DN	1.89426e-05	0.00134705	0.57561	-0.34796	-1.89043	162	HLA-DQA1, CYP1B1, TSPAN4, RNF19B, GRN, FLOT2, GNA15, PDLIM7, CDC42EP3, JAG1, APOBR, CLEC3B, NIBAN1, CPD, PCOLCE2, FHOD1, MYO1F, F11R, APLP2, CYTH4, IER3, STAB1, ITGAM, MYO5A, ERO1A, ELL, CSF3R, CES1, NBEAL2, SDF4, DHRS7, SEC24D, IMPDH1, TPD52L2, PDIA6, IGF2R, PRKCD, PTPRE, ADAM8, ARPC1A, ARF1, SEL1L3, LPAR2, IL1R1, NOMO1, MAF, TBK1, HSPA5, PTX3, SLC15A3, TGOLN2, CD14, ANPEP, GAPDH, PAM, MYDGF, PO…	C7	IMMUNESIGDB	Genes down-regulated in comparison of peripheral blood mononuclear cells (PBMC) from patients with acute E. coli infection versus PBMC from patients with acute S. aureus infection.
REACTOME_HEMOSTASIS	1.90666e-05	0.00135216	0.57561	-0.246839	-1.55163	530	H3C12, CD47, ORAI1, COL1A1, HABP4, PIK3CG, PHACTR2, IGF2, ITGA5, P2RX5, COL1A2, EPCAM, PRKG2, APP, RAB27B, KIF2C, CAPZB, PRKAR1A, PPBP, SERPING1, THBS1, ISLR, F13A1, PFN1, ATP2B4, VCL, F10, PIK3R5, GNA15, TUBB6, PLEK, GRB14, FN1, GLG1, PROCR, H3C6, JAML, SELE, PIK3CB, ARRB2, PLAU, PDPN, CLEC3B, VAV1, ECM1, GAS6, SERPINA3, ALDOA, GNAI2, TUBA1C, CFD, ABCC4, CLU, VEGFA, ANXA2, ACTB, PRKACA, GNB5, YW…	C2	CP:REACTOME	Hemostasis
MIYAGAWA_TARGETS_OF_EWSR1_ETS_FUSIONS_DN	1.98564e-05	0.00140432	0.57561	-0.31564	-1.77416	206	ACTG2, COL8A1, LSM11, COL1A2, CEMIP, SCG5, ASS1, COL3A1, SVIL, AKR1C1, ELOVL6, PDLIM4, NRP1, CDC42EP3, IGFBP3, DAB2, SPOCD1, PLAU, LTBR, GRIA1, ADAMTSL1, NEDD4L, PCDH18, NR2F2, NID2, SLC2A3, TENM3, ZNF365, RFTN1, PABPC1L, DMXL2, CCL3, NABP1, LUM, TSPAN5, HSPB7, FOXD1, CHN1, TNFRSF19, SEC24D, ACTN1, LTBP1, ABHD2, SMAD7, PID1, MME, IL1R1, AK5, DOK5, CCDC80, CAMK2D, TCAF1, ARHGEF5, SEMA3C, ADAM12, G…	C2	CGP	Genes commonly down-regulated in UET-13 cells (mesenchymal progenitor) by expression of EWSR1 [GeneID=2130] fusions with ETS transcription factors FLI1 and ERG [GeneID=2313 ,2078].
GSE339_CD4POS_VS_CD8POS_DC_UP	1.99719e-05	0.00140865	0.57561	-0.338597	-1.87108	184	TPM2, RYR3, TMEM268, ROCK2, SESN1, SLC6A13, SHISA5, CTSA, LASP1, TEP1, TLR6, LTA4H, CD300C, UHMK1, VEGFA, TNFRSF1B, MYO1F, MAN1A1, SLC2A3, FAM32A, RHOH, DIAPH1, SMIM14, PPP1R17, CCL4, HIC1, MYO1B, PTPN6, FOLR2, COL13A1, SAA1, ACAD9, CCRL2, FGF5, LAT2, TNFRSF19, LCP2, RASSF5, GART, STK38, SMAD7, ABCF3, RGS14, DHRS3, VOPP1, ARHGEF3, RASAL3, BCL3, IL1R1, IFITM2, FCER1G, EMP3, CCDC80, ARHGAP9, CDK7, …	C7	IMMUNESIGDB	Genes up-regulated in comparison of CD4 [GeneID=920] dendritic cells (DC) versus CD8 DCs.
REACTOME_INTEGRIN_CELL_SURFACE_INTERACTIONS	2.0392e-05	0.00143437	0.57561	-0.443906	-2.09059	73	CD47, COL1A1, MADCAM1, ITGA5, COL8A1, COL1A2, COL6A2, COL3A1, KDR, COL6A3, COL18A1, THBS1, VTN, FN1, COL4A2, COL4A1, F11R, HSPG2, ITGAM, COL8A2, COL13A1, ITGAL, LUM, ICAM5	C2	CP:REACTOME	Integrin cell surface interactions
GSE5679_CTRL_VS_PPARG_LIGAND_ROSIGLITAZONE_AND_RARA_AGONIST_AM580_TREATED_DC_DN	2.07191e-05	0.00145342	0.57561	-0.332129	-1.83002	181	GSTM5, PHF1, PRNP, ATP6V1D, TAGLN, FGFR1, GAS1, AOC3, LGMN, IGFBP4, ANXA1, SESN1, VCL, DCN, MRC1, CAVIN3, CNN2, PTGIS, TMEM109, GAS6, MYC, GSTM3, S100A4, CLU, RGS10, C3AR1, ANXA2, ARL8B, JUN, FRMD6, CD53, ATP6V1A, HFE, LXN, LAT2, PSMD8, SLC25A4, OLA1, CCN2, ADAM8, FOSL2, IL1R1, CTPS1, SLC20A1, TAC1, PDLIM1, C15orf39, RARRES2, BAIAP2, LGALS1, WASHC2A, TMEM176A, GPR162, CTSD, CD83, GSDME, RAB34	C7	IMMUNESIGDB	Genes down-regulated in monocyte-derived dendritic cells: untreated versus rosiglitazone and AM580 [PubChem=77999;2126].
PID_INTEGRIN3_PATHWAY	2.09218e-05	0.00145506	0.57561	-0.577078	-2.31358	36	CD47, COL1A1, SPHK1, COL1A2, KDR, THBS1, TGFBI, LAMC1, VTN, PVR, FN1, PLAU, LAMB1, COL4A1, VEGFA, F11R, CCN1, PDGFB, PDGFRB, ITGB3, PECAM1, COL4A3, LAMA4	C2	CP:PID	Beta3 integrin cell surface interactions
REACTOME_INFECTIOUS_DISEASE	2.09328e-05	0.00145506	0.57561	-0.221981	-1.43652	773	H3C12, H2AC15, GPS2, VPS33B, RPS26, PSMD4, CREB1, SUGT1, STX1A, FXYD7, TAF11, KPNA2, MGAT4C, VHL, APP, H4C15, HTR7, PSMA7, RPL5, GGT5, RPS27L, POMC, ROCK2, POLR2B, ERCC3, PRKAR1A, HSP90AB1, FXYD6, PSMD13, WASF1, MAN1B1, TXN, GANAB, IMPDH2, FCGR1A, ADCY7, TUBB6, MYO1C, ATP6V1H, VIP, PSMD1, MRC1, H3C6, MAP2K3, GTF2H4, IL10, APOBEC3G, RPL23, ARPC2, TUBB, SV2B, PSMB3, VAV1, NUP50, H4C12, RPL19, MAP2K…	C2	CP:REACTOME	Infectious disease
GOBP_POSITIVE_REGULATION_OF_INFLAMMATORY_RESPONSE	2.09621e-05	0.00145506	0.57561	-0.396076	-1.98392	103	CD47, PIK3CG, TLR10, APP, CCN4, CEBPB, GRN, VAMP8, CNR1, KARS1, MAPK13, NINJ1, IL18, GPSM3, NUPR1, TNFRSF1A, NLRP1, PTGER4, CCL3, PLCG2, IL16, NFKBIZ, HLA-E, C3, SNCA, S100A12, CASP1, ADAM8, CX3CL1, IL1RL1, WNT5A, LPL, ABCC1, ALOX5AP, IL17RA, MDK, PTGS2, CTSC, GPR4, ZP3, LGALS1, MGST2, LRRK2, TREM2, SERPINE1, C2CD4B, PYCARD, PLA2G7, FABP4, DDT, OSM, PDE2A, S100A8, IL6, CEBPA, NPY5R, IFI35, TLR3, …	C5	GO:BP	Any process that activates or increases the frequency, rate or extent of the inflammatory response. [GOC:ai]
GSE360_DC_VS_MAC_B_MALAYI_LOW_DOSE_UP	2.10229e-05	0.00145506	0.57561	-0.338868	-1.85191	169	ATP6V1D, LTBP2, TAGLN, TAF11, ALDH1B1, LIAS, ANXA1, GPR35, EIF3I, YARS1, GANAB, SAMM50, PDLIM7, STAT6, PIKFYVE, KARS1, CERS6, RER1, ATRN, APOBEC3C, UBE2N, TUBB, TMEM109, LASP1, MAP2K6, EFNB3, CPSF1, PLCB2, RPH3A, ACTR2, WDR7, TM7SF2, DIAPH1, ITGAM, TPM1, STXBP2, SLC33A1, SV2A, LAPTM4B, CHP1, GART, STK38, ARPC3, MRC2, ACOT8, CX3CL1, COPS6, RAD23B	C7	IMMUNESIGDB	Genes up-regulated in comparison of dendritic cells (DC) exposed to 5 worm/well B. malayi versus macrophages exposed to 5 worms/well B. malayi.
HALLMARK_ANGIOGENESIS	2.10687e-05	0.00145506	0.57561	-0.595032	-2.29326	31	FGFR1, APP, COL3A1, NRP1, TNFRSF21, VTN, JAG1, S100A4, VEGFA, THBD, LRPAP1, LUM, FSTL1, POSTN, SERPINA5, LPL	H		Genes up-regulated during formation of blood vessels (angiogenesis).
GOMF_CIS_REGULATORY_REGION_SEQUENCE_SPECIFIC_DNA_BINDING	2.10796e-05	0.00145506	0.57561	0.244713	1.46268	937	ZNF727, NHLH2, ZNF606, ZNF446, HEY2, ZBTB42, HBP1, IRF2, HNRNPU, ZNF780B, FOXP4, BCL6B, GTF2IRD1, ZNF280D, KLF4, RFX7, ZSCAN32, FOXK1, TBX3, TP73, NFATC3, ZBTB47, ZBTB40, TCFL5, TCF7, ZBTB20, ZNF691, ZNF500, SOX6, DMTF1, ZNF317, ZNF664, MITF, GLIS1, TBP, ZBTB14, MAFK, EBF4, MGA, ZNF100, ZNF423, ZNF112, NACC1, SREBF1, ZBTB17, ZFHX4, VAX1, ZNF605, ZIC4, ZSCAN5A, ZNF236, ZNF527, ZNF519, ZNF232, ZNF1…	C5	GO:MF	Binding to a specific upstream regulatory DNA sequence (transcription factor recognition sequence or binding site) located in cis relative to the transcription start site (i.e., on the same strand of DNA) of a gene transcribed by some RNA polymerase. The proximal promoter is in cis with and relatively close to the core promoter. [GOC:txnOH-2018]
YAO_TEMPORAL_RESPONSE_TO_PROGESTERONE_CLUSTER_16	2.11831e-05	0.00145831	0.57561	-0.455253	-2.121	69	COL1A1, CRABP1, COL1A2, COL6A2, PCOLCE, COL3A1, COL6A3, COL18A1, AOC3, PDLIM7, DAB2, CAVIN3, KDELR3, COLGALT1, COL4A2, COL4A1, BZW2, SMOC2, ACTC1, ACTN1, TFPI, GUSB, MRPS25, PCP4L1, GAPDH, IGFBP5, NPNT, PCDH7, WDR6, FEZ2, SPARC, TNNT2, FBN1	C2	CGP	Genes co-regulated in uterus during a time course response to progesterone [PubChem=5994]: SOM cluster 16.
WIELAND_UP_BY_HBV_INFECTION	2.17058e-05	0.00149033	0.57561	-0.404339	-1.98782	92	HLA-DQB1, PARP12, KPNA2, CTSB, HLA-DRB1, ISG20, FCGR1A, IFI30, PTTG1, FGL2, HLA-DRA, C3AR1, LAPTM5, GBP1, CCL5, HLA-B, CD53, S100A10, TYROBP, PLAAT4, HLA-A, RNASET2, ADGRE1, SOD2, HLA-E, DENND2D, CD74, ADA2, PPT1, ARHGDIB, UBE2L6, CD48, HLA-DMB, GBP2, COTL1, FCER1G, CTSC, C1QB, CXCR4, RAB20, IFI27, MCM6, UCP2, CD83, SRGN, RAC2, GABBR1, WARS1, B2M, STAT1, HLA-F	C2	CGP	Genes induced in the liver during hepatitis B (HBV) viral clearance in chimpanzees.
GOBP_CYTOKINE_PRODUCTION	2.18202e-05	0.00149327	0.57561	-0.235404	-1.4916	583	CD47, PRNP, LILRA4, PIK3CG, ARG2, TLR10, NDFIP1, CYP1B1, SPHK1, KLF2, FCGR2B, APP, POMC, ROCK2, COL3A1, HSP90AB1, CCN4, HLA-DRB1, POLR3B, PLA2R1, CEBPB, CCL19, THBS1, ANXA1, AGPAT2, CD6, TNFRSF21, ARFGEF2, ADCY7, FN1, KPNA6, MAP2K3, ARRB2, IGF2BP2, PLD4, IL10, NR4A3, ALOX15B, DHX33, POLR3A, CD24, AKIRIN2, G3BP1, IL1RL2, TUSC2, MAPK13, GAS6, TLR6, RUNX1, IL27RA, IL12RB1, CLU, C3AR1, AIF1, LAPTM5, …	C5	GO:BP	The appearance of a cytokine due to biosynthesis or secretion following a cellular stimulus, resulting in an increase in its intracellular or extracellular levels. [GOC:add, ISBN:0781735149]
NEMETH_INFLAMMATORY_RESPONSE_LPS_UP	2.1864e-05	0.00149327	0.57561	-0.444056	-2.11523	76	SLPI, FCGR2B, GLRX, RCN1, CITED2, DAB2, MLLT11, HCK, STK10, C3AR1, CEBPD, TNFRSF1B, IER3, CCL3, IL1RN, CASP4, APBB1IP, LCP2, CDKN1A, ETF1, PRKCD, ADAR, IL1RL1, HMGCR, HCLS1, TRIM25, SLC20A1, TOP1, GCH1, PTGS2, MYADM, LILRB4, MAP2K1, SRGN, ETS2, TGFB1, IER2, SLC11A1, ODC1, STAT1	C2	CGP	Genes up-regulated in RAW 264.7 cells (macrophage) 3 hr after stimulation with bacterial lipopolysaccharide (LPS).
CUI_DEVELOPING_HEART_C4_ENDOTHELIAL_CELL	2.2009e-05	0.00149922	0.57561	-0.365842	-1.94419	139	PLVAP, ITGA5, KDR, FOXC1, COL18A1, FXYD6, IGFBP4, NRP1, LEPR, PROCR, CLIC1, NPR3, CLEC3B, EFNA1, AFAP1L1, CTHRC1, F11R, MMRN1, TNFRSF1A, NOS3, GMDS, ST6GAL1, MCAM, ADGRG6, SPINT2, MMRN2, LY6E, HLA-E, SMAGP, WWTR1, PODXL, PLK2, NRP2, POSTN, F2R, NPR1, SNRK, TFPI, IFITM2, CDH11, FCGRT, ESAM, TM4SF1, TGM2, CHSY1, ENTPD1, EHD2, HES1, PECAM1	C8
HAMAI_APOPTOSIS_VIA_TRAIL_UP	2.23523e-05	0.00151861	0.57561	0.2698	1.56272	604	EIF3A, SLC39A6, ANKHD1, BAZ1A, PIEZO2, MTDH, ERCC5, AIMP1, NT5C, WWP1, ERGIC2, SCAF11, LAYN, BBX, RAMP1, RFC1, PCCA, RAD51AP1, HIPK2, SHTN1, CD55, CDK5RAP2, BCCIP, ITGA6, ASPM, GTF2F2, RBM17, MYO6, TRIP11, ZCRB1, MITF, MTR, GOLGB1, AGTPBP1, PPP4R2, SMCHD1, CEP192, NSRP1, ZNF22, OMA1, IFT74, KIF15, CCDC112, SKAP2, AP3B1, KIF16B, PHF3, RBBP8, RECQL, PPP2R3A, ANLN, CDC42BPA, BRCA1, ZMYM1, ALDH2, TCE…	C2	CGP	Genes up-regulated in T1 cells (primary melanoma, sensitive to TRAIL [GeneID=8743]) compared to G1 cells (metastatic melanoma, resistant to TRAIL).
GSE29618_BCELL_VS_PDC_UP	2.26195e-05	0.00152924	0.57561	-0.344374	-1.87772	165	PARP12, PLEKHA2, NCK2, P2RX5, KLF2, FCGR2B, ADAM28, RAB8B, ISG20, CDC42EP3, PIKFYVE, FAM111A, HLA-DOB, CD24, BTG1, MYC, SCPEP1, LAPTM5, PLEKHF2, SP100, SLC2A3, DUSP1, LIMD2, JUN, RHOH, NLRP1, ARHGAP25, PTPRC, ST6GAL1, PLAAT4, PLCG2, LAT2, CD37, BASP1, ATP2B1, DPEP2, TENT5C, ADAM8, ARHGDIB, CD48, TPD52, RRAS2, PDK1, ZFP36L1, MMD, SHMT2, HK2, CEMIP2, IER5, BANK1, ALOX5, PDLIM1, PHTF2, LYST, BCL2A1,…	C7	IMMUNESIGDB	Genes up-regulated in comparison of B cells versus plasmacytoid dendritic cells (pDC) .
CUI_DEVELOPING_HEART_COMPACT_VENTRICULAR_CARDIOMYOCYTE	2.26269e-05	0.00152924	0.57561	-0.478867	-2.11914	55	COL1A1, OGN, COL1A2, COL6A2, DES, CASQ2, COL3A1, COL6A3, MGP, LPP, DCN, ELN, FN1, IL32, COL15A1, COL12A1, C7, NIBAN1, HLA-B, MMP2, LUM, POSTN, AHSP, PLAC9, LGALS1, TSPO, SRGN	C8
GOBP_TAXIS	2.29054e-05	0.00154403	0.57561	-0.25038	-1.5624	497	CCL28, VSTM2L, PIK3CG, YTHDF1, CMTM8, FGFR1, UNC5A, SLIT1, WNT3, APP, EPHA6, EPHA10, PPIB, DLX5, KDR, MCU, PPBP, LGMN, NRP1, CCL19, THBS1, ANXA1, LAMC2, NTN1, PLXNC1, CCN3, PIKFYVE, GDF7, OPN4, CAMK1D, JAML, PIK3CB, ARRB2, IL10, PLAU, BMP4, DPP4, EFNA1, VAV1, SEMA3F, DEFB1, GAS6, SEMA6C, CCR9, EFNB3, B3GNT2, NIBAN2, PTPRM, NINJ1, C3AR1, VEGFA, AIF1, GPSM3, LAMA2, CCR5, DUSP1, SERPIND1, CYRIB, CCL…	C5	GO:BP	The directed movement of a motile cell or organism in response to an external stimulus. [GOC:jl, ISBN:0192801023]
AIZARANI_LIVER_C24_EPCAM_POS_BILE_DUCT_CELLS_3	2.303e-05	0.00154839	0.57561	-0.348233	-1.8765	154	SLPI, VSTM2L, DSP, CD151, EPCAM, MLPH, LMO7, TPM4, SORBS2, TXN, VAMP8, TNFRSF21, ANXA11, MYO1C, SPINT1, CLIC1, TUBB, CD24, KRT18, DEFB1, SOX4, LMO4, TNFAIP2, CLU, NR2F2, ANXA2, ACTG1, S100A11, TPM1, S100A10, CES1, MYL12B, TUBB4B, RAB11FIP1, SPINT2, WEE1, KLF5, MYL6, CHP1, TNFRSF12A, ABHD2, KRT19, MAL2, CLINT1, DSG2, NQO1, TM4SF1, AKR1C2, ATP1B1, PHLDA2, PERP, MYADM, ANPEP, TSPO, LAMB3	C8
ZHENG_CORD_BLOOD_C8_PUTATIVE_LYMPHOID_PRIMED_MULTIPOTENT_PROGENITOR_2	2.30923e-05	0.00154856	0.57561	-0.431478	-2.05734	77	HOPX, TPM4, SPINK2, HCST, HLA-DRA, RUNX1, S100A4, EIF3K, MPG, ERLIN1, PRAM1, GYPC, ACTG1, HLA-B, ARHGAP25, CSF3R, HLA-A, RNASET2, RCSD1, CD74, FLT3, IFITM1, RACK1, ARHGAP30, CD48, PADI4, BCL3, MACROH2A1, MAP3K8, IFITM3, ENO1, GAPDH	C8
MODULE_291	2.33817e-05	0.00156391	0.57561	-0.483592	-2.15609	57	COL1A2, MYL9, FZD2, PPIB, LGMN, SECTM1, GNA15, FN1, NNMT, NINJ1, C3AR1, TBXAS1, SPI1, IER3, SAA1, SOD2, CCR1, PLOD1, POMZP3, POSTN, P2RX4, MT1H, CDH11, ATP1B1, CD14, IFI27, TRIP10, MGAT1, LGALS3BP, PRRX1, MAN2B1, TLR1, GDF15, PLD3	C4	CM	B-cell malignancies expression clusters.
GAO_LARGE_INTESTINE_ADULT_CI_MESENCHYMAL_CELLS	2.39852e-05	0.00160014	0.57561	-0.281678	-1.65439	289	TRPV2, PIK3CG, SLC47A1, STAT4, BRSK1, P2RX5, ABI3, CHST15, FCGR2B, ADAM28, COL18A1, SPINK2, ISG20, TAGAP, HCST, PNOC, ARHGAP15, HLA-DOB, NR4A3, APOBEC3G, FGL2, SLA, FYB1, CD300A, NIBAN1, SCPEP1, IL27RA, S100A4, IL12RB1, CST7, LAPTM5, NCF1, LRRC8C, GPSM3, SLC2A3, LIMD2, LCP1, PARVG, ANKRD28, DOCK2, CYTH4, FGD2, GYPC, RHOH, CD27, NLRP1, ARHGAP25, PTPRC, FRMD6, MYO5A, POU2F2, CD53, DAPP1, TRAF3IP3, …	C8
GOBP_POSITIVE_REGULATION_OF_CYTOKINE_PRODUCTION	2.45665e-05	0.00163471	0.57561	-0.269373	-1.62084	362	PIK3CG, CYP1B1, SPHK1, APP, ROCK2, POLR3B, PLA2R1, CEBPB, CCL19, THBS1, ANXA1, AGPAT2, CD6, ARFGEF2, KPNA6, IL10, NR4A3, ALOX15B, DHX33, POLR3A, AKIRIN2, G3BP1, IL1RL2, TUSC2, MAPK13, TLR6, RUNX1, IL27RA, IL12RB1, CLU, C3AR1, AIF1, LAPTM5, IL18, GPSM3, MEFV, SULF1, TRAF2, CYRIB, RPS3, HK1, RFTN1, NLRP1, SYK, STING1, PTPRC, SOD1, POU2F2, NFATC4, ATF2, PTGER4, MNDA, TYROBP, SAA1, CCL3, CSF1R, HLA-A…	C5	GO:BP	Any process that activates or increases the frequency, rate or extent of production of a cytokine. [GOC:add, ISBN:0781735149]
GOCC_PIGMENT_GRANULE	2.49068e-05	0.00165311	0.57561	-0.392565	-1.96371	101	TRPV2, SERPINF1, MYH11, RAB27B, PPIB, CTSB, HSP90AB1, MYO7A, GANAB, YWHAB, ANXA11, SND1, ATP6V1B2, ANXA2, YWHAZ, PDIA4, MYO5A, SLC3A2, TYRP1, FLOT1, RAN, PDIA6, SDCBP, RPN1, RAB35, AHCY, ITGB3, HSPA5, ATP1B3, CLTC, P4HB, CTSD, ATP1A1, RAB38, MREG, MMP14, HSP90B1, RAB17, PDCD6IP, HSPA8, RAB32, RAB5C, RAB7A, RAB29, PDIA3	C5	GO:CC	A small, subcellular membrane-bounded vesicle containing pigment and/or pigment precursor molecules. Pigment granule biogenesis is poorly understood, as pigment granules are derived from multiple sources including the endoplasmic reticulum, coated vesicles, lysosomes, and endosomes. [GOC:jid, GOC:mh]
GOBP_MONONUCLEAR_CELL_MIGRATION	2.5246e-05	0.00167134	0.57561	-0.358287	-1.92355	149	CD47, PIK3CG, MADCAM1, APP, LGMN, CCL19, THBS1, ANXA1, CCN3, MIA3, JAML, ECM1, GAS6, STK10, IL27RA, C3AR1, AIF1, CCR5, DUSP1, CCL5, F11R, SPI1, APOD, CCL4, PDGFD, FOLR2, SAA1, CCL3, CSF1R, ITGAL, LGALS9, CXCL12, CD200R1, MSMP, MYO1G, MAPK3, CCR1, S100A12, ADAM8, PDGFB, CX3CL1, WNT5A, ALOX5, CALR, EPS8, RARRES2, DOCK8, MDK, ARHGEF5, LYN, PECAM1, CXCR4, GPR183, IL34, RIPOR2, ITGA4, SERPINE1, CXCR1,…	C5	GO:BP	The movement of a mononuclear cell within or between different tissues and organs of the body. [GOC:mah]
WILCOX_RESPONSE_TO_PROGESTERONE_DN	2.58821e-05	0.00170908	0.57561	-0.495653	-2.17076	53	COL1A1, COL1A2, MYL9, DES, MGP, THBS1, ATP2B4, PDLIM7, FN1, IGFBP3, IGFBP2, PLAU, ABCC6, ARHGDIA, MMP2, COL8A2, CHRNE, MME, CUX2, PECAM1, COL11A1, INHBA, IGFBP5, STAR, COX7A1, PLEC, FRMD4A, MICAL2, PIEZO1, KCNK3, HSD11B2, CSTA, CCND1, COL6A1, COL5A2	C2	CGP	Genes down-regulated in primary cultures of ovarian surface epithlium cells exposed to progesterone [PubChem=5994] for 5 days.
GOBP_SUPRAMOLECULAR_FIBER_ORGANIZATION	2.6164e-05	0.0017233	0.57561	-0.23236	-1.48414	654	CD47, WHAMM, COL1A1, FMOD, ARHGAP28, LTBP2, MFAP4, FBLN5, CYP1B1, NCK2, PFDN6, COL14A1, DSP, CLIP3, COL1A2, PAFAH1B1, PAK1, FOXC2, MYH11, ELMO3, TPM2, CCDC13, APP, THSD4, MYL9, ADAMTS2, TPM4, ROCK2, PHLDB2, DES, STMN3, COL3A1, KIF2C, SVIL, CAPZB, FOXC1, PRKAR1A, HSP90AB1, MYO7A, SORBS2, PKP2, MCU, WASF1, GPX1, NRP1, PFN1, BID, AKAP13, NAA80, IQGAP2, PLEK, CDC42EP3, ELN, MYO1C, PPM1E, SPTB, OBSCN,…	C5	GO:BP	A process that is carried out at the cellular level which results in the assembly, arrangement of constituent parts, or disassembly of a supramolecular fiber, a polymer consisting of an indefinite number of protein or protein complex subunits that have polymerised to form a fiber-shaped structure. [GOC:pr]
MODULE_53	2.63191e-05	0.00172911	0.57561	-0.273748	-1.63263	330	HLA-DQA1, CRABP1, CYP1B1, EIF4EBP1, CHST15, GLRX, KIF2C, CDK1, SULT4A1, ANXA1, SPINK2, GNA15, EPB41L3, MLLT11, IGFBP2, PTTG1, IL32, PLAU, CD24, CLEC3B, CARD10, KCNN4, SLA, HCK, SOX4, MYC, TPX2, S100A4, CST7, RGS10, H2BC12, LST1, AIF1, LAPTM5, M6PR, GPSM3, CCL5, LCP1, DOCK2, CASP2, PRKDC, JUN, IER3, S100A11, PTPRC, CCL4, CD53, ADSL, MNDA, MMP2, HAP1, EXOSC2, CCL3, SV2A, LGALS9, WEE1, RGS1, TTI1, C…	C4	CM	Cell line expressed genes.
BROWNE_HCMV_INFECTION_16HR_DN	2.65275e-05	0.00173652	0.57561	-0.440201	-2.07314	73	COL1A1, SLC16A5, COL1A2, ADH1B, ADAMTS2, SVIL, FBXO21, GDF10, NRP1, THBS1, ATP2B4, PDLIM7, CAMK1G, APOBEC3C, MAP2K6, RUNX1, MPG, ROR2, TPM1, COL13A1, TRAM2, CHN1, ATP13A3, DHRS3, MT1H, WNT5A, CACNA1E, PTX3, STMN2, ANPEP	C2	CGP	Genes down-regulated in primary fibroblast cell culture after infection with HCMV (AD169 strain) at 16 h time point that were not down-regulated at the previous time point, 14 h.
DURANTE_ADULT_OLFACTORY_NEUROEPITHELIUM_B_CELLS	2.66137e-05	0.00173652	0.57561	-0.605094	-2.31333	30	HLA-DQA1, HLA-DQB1, HLA-DRB1, TAGAP, HLA-DRA, LAPTM5, LIMD2, POU2F2, CD53, CD37, CD74, CORO1A, IRF8, HLA-DMB, BANK1, CXCR4, TNFRSF13C, GPR183, CD83	C8
RPS14_DN.V1_UP	2.66332e-05	0.00173652	0.57561	-0.345352	-1.89296	171	HLA-DQB1, CYP1B1, ACTA2, SESN1, F13A1, TGFBI, DCN, CDC42EP3, SPINT1, JAG1, MS4A6A, CACNB4, NR4A3, PLAU, ATP8B1, TRIM36, CD300A, HCK, TAC3, TNFAIP2, C3AR1, LST1, VNN1, AIF1, MYO1F, GNB5, ARHGAP25, ITGAM, PTGER4, MNDA, DMXL2, TYROBP, ITGAL, CALB1, ADA2, CDKN1A, CROT, PTPRE, CASP1, PID1, PLK2, HLA-DMB, ARHGEF3, CLEC7A, KCTD12, SPTLC3, MAF, PTGDS, CD14, BCL2A1, ANPEP, PILRA, KYNU, GPR183, MARCKS, NCF…	C6		Genes up-regulated in CD34+ hematopoietic progenitor cells after knockdown of RPS14 [Gene ID=6208] by RNAi.
QI_PLASMACYTOMA_DN	2.70976e-05	0.00176237	0.57561	-0.418808	-2.0374	87	SLPI, COL1A1, EPCAM, PRMT7, COL6A2, LYVE1, SVIL, GANAB, LAMC2, EIF4A1, UBE2T, PVR, MATK, IGFBP3, SND1, PTGIS, AJUBA, PSMB3, LAMB1, BLNK, MYC, COL4A2, VEGFA, SKIL, GNE, MMP2, BASP1, FSTL1, CLIP1, XBP1	C2	CGP	Down-regulated genes that best disciminate plasmablastic plasmacytoma from plasmacytic plasmacytoma tumors.
DURANTE_ADULT_OLFACTORY_NEUROEPITHELIUM_CD8_T_CELLS	2.73878e-05	0.00177678	0.57561	-0.474187	-2.12025	58	HOPX, TAGAP, HCST, JAML, IL32, SYTL3, BTG1, FYB1, CST7, LAPTM5, CCL5, LCP1, PTPRC, CCL4, PTGER4, TRAF3IP3, RGS1, SAMSN1, CORO1A, ARHGDIB, CD48, GMFG, LEPROTL1, ALOX5AP, LSP1, CCL4L2, CD3E, CXCR4, CD7, RAC2	C8
ATF2_UP.V1_DN	2.74686e-05	0.00177756	0.57561	-0.341538	-1.85817	163	CTH, FMOD, CRLF1, MFAP4, CYP1B1, SLC24A3, ITGBL1, CEMIP, GAS1, PTGFR, FBLN2, CFB, PKP2, CCN4, SLC12A8, VTN, PLN, IGFBP2, PDPN, DEPP1, PTGIS, SERPINA3, NDUFA4L2, ERAP2, CSGALNACT1, CD302, CFH, SGCG, BHMT, C1RL, CD68, ERO1A, STXBP2, RAB11FIP1, SPINT2, CXCL12, DENND2D, RARRES1, ADA2, PID1, TPD52, EDNRA, PNMA2, ARHGEF3, PLS1, IL1R1, KCTD12, GOLGA8A, PTX3, UBXN2B, GCH1, PTGS2, PIM1, SLIT3, ITIH5, CELF…	C6		Genes down-regulated in myometrial cells over-expressing ATF2 [Gene ID=1386] gene.
GSE21360_SECONDARY_VS_QUATERNARY_MEMORY_CD8_TCELL_UP	2.76433e-05	0.00178441	0.57561	-0.340218	-1.84553	159	DSP, SOCS3, KRTDAP, MFHAS1, RNF149, GPR35, PIK3R5, GCNT2, PLEK, PVR, GADD45B, PROCR, IL10, PDPN, PPME1, OASL, TNFAIP2, TNFRSF1B, DUSP1, CCL5, NUPR1, GFOD1, CCL4, FAS, ADORA3, DMXL2, CSF3R, STX11, CCL3, IL1RN, CCRL2, SOD2, CASP4, NFKBIZ, SAMSN1, IKBKE, BASP1, ADAM8, IL1RL1, HK2, SLC39A14, BCL3, IER5, FNDC3A, PERP, MAP3K8, SLC15A3, PTGS2, TCIRG1, CD14, EBI3, PIM1, IRAK3, IL7R, WDFY1, VCAM1, CXCR2, …	C7	IMMUNESIGDB	Genes up-regulated in memory CD8 T cells: 2' versus 4'.
SERVITJA_ISLET_HNF1A_TARGETS_UP	2.79212e-05	0.00179786	0.57561	-0.346058	-1.86478	154	HLA-DQA1, CYP1B1, PRKG2, ASS1, PCOLCE, COL3A1, C1S, COL18A1, CCN4, ANXA1, ADCY7, PLCB4, VIP, CNR1, PROCR, HCN1, SYTL3, NSG2, CNN2, SV2B, DKK3, TNFAIP2, HPS1, LAPTM5, ANXA2, GUCY1A1, HLA-B, UCHL1, CEACAM4, MCAM, CXCL12, BLVRB, SNCA, IFITM1, GRM7, SEMA4F, ARHGDIB, POSTN, LY6H, RAB6B, CDH11, MAF, SERPINE2, TGM2, C1QC, STMN2, SLC15A3, IFITM3, CTSC, C1QB, SCARF2, LGALS1, CAMK4, SNAI2, AEBP1, KCND2, MS…	C2	CGP	Genes up-regulated in pancreatic islets upon knockout of HNF1A [GeneID=6927].
GOBP_DETECTION_OF_STIMULUS_INVOLVED_IN_SENSORY_PERCEPTION	2.81695e-05	0.00180935	0.57561	0.379228	1.88917	153	OR2L13, OR2L2, OR2L5, OR2L3, OR2AK2, OR2M4, OR2L8, PIEZO2, OR2M3, OR2M2, OR2M5, ITGA2, OR6V1, OR6X1, TAS2R7, TMEM120A, ADORA1, OR2B8P, OR2T4, CCDC66, SLC24A4, CEP250, OR13J1, OR2C1, AZGP1, EPHB1, OR2AG1, OR2T33, ASIC3, OR3A3, HPN, OR2D2, WHRN, OR13C4, TAS2R20, PJVK, TAS2R39, OR2AG2, OR1L4, NTSR1, OR5C1, TAS2R50, OR2H2, OR10A2, ROM1, TRPV1, TAS2R14, OR9A2, OR10A5, RTP5, GRM6, FYN, BEST1, OR10A4, T…	C5	GO:BP	The series of events involved in sensory perception in which a sensory stimulus is received and converted into a molecular signal. [GOC:ai, GOC:dos, GOC:dph]
GSE29618_MONOCYTE_VS_PDC_DAY7_FLU_VACCINE_UP	2.87237e-05	0.00184038	0.57561	-0.324147	-1.8009	190	CYP1B1, QPCT, CEBPB, PLXNC1, CDC42EP3, EPB41L3, CLIC1, IFI30, FGL2, HCK, ALDOA, LTA4H, SCPEP1, TNFAIP2, LST1, VEGFA, AIF1, CEBPD, TNFRSF1B, MYO1F, TBXAS1, SLC2A3, APLP2, TNFRSF1A, HK1, IER3, ITGAM, IFNGR2, CSF3R, PLAAT4, CSF1R, IL1RN, BLVRB, LAT2, SOD2, AOAH, VNN2, ADAP2, DPEP2, S100A12, CASP1, HMOX1, ADAM8, PID1, ZFP36L1, HK2, CLEC7A, GBP2, CD86, BLVRA, NAIP, ALOX5, SH3BP2, GMFG, DENND3, GCH1, C…	C7	IMMUNESIGDB	Genes up-regulated in comparison of monocytes from influenza vaccinee at day 7 post-vaccination versus plasmacytoid dendritic cells (mDC) at day 7 post-vaccination.
KAYO_CALORIE_RESTRICTION_MUSCLE_UP	2.89563e-05	0.00185002	0.57561	-0.412098	-1.99448	85	COL1A1, COL1A2, GAS1, APP, DES, COL3A1, COL6A3, IGFBP4, FN1, NR4A3, PLAU, CLEC3B, VAT1, S100A4, CD302, ACTB, LAMA2, CCR5, HSPG2, S100A11, AP2S1, FAS, LUM, CALB1	C2	CGP	Upregulated in the vastus lateralis muscle of middle aged rhesus monkeys subjected to caloric restriction since young adulthood vs age matched controls
GOBP_CIRCULATORY_SYSTEM_PROCESS	2.90171e-05	0.00185002	0.57561	-0.249233	-1.54756	478	PLVAP, PIK3CG, SLC6A20, SLC24A3, TMEM65, SLC38A1, DSP, ACTA2, SLC19A1, COL1A2, GJC1, SLC16A12, FOXC2, KLF2, SLC22A8, HTR7, HOPX, POMC, ROCK2, DES, TBX18, CASQ2, FOXC1, PKP2, GPX1, SERPING1, SLC6A13, MYH7, AKAP13, ATP2B4, SLC29A1, ELN, CNR1, LEPR, PLN, MAP2K3, NPR3, MTOR, SLC22A3, HRC, HTR2A, GJA5, GAS6, MAP2K6, TAC3, GNAI2, LPA, NEDD4L, SCPEP1, ABCC4, ERAP2, C3AR1, VEGFA, NR2F2, PRKACA, GLP1R, TB…	C5	GO:BP	A organ system process carried out by any of the organs or tissues of the circulatory system. The circulatory system is an organ system that moves extracellular fluids to and from tissue within a multicellular organism. [GOC:mtg_cardio]
GSE42021_TREG_PLN_VS_CD24HI_TREG_THYMUS_UP	2.91195e-05	0.00185198	0.57561	-0.331265	-1.82764	182	STAT4, MADCAM1, IGF2, SOCS3, CRABP2, FBLN2, CEBPB, RBM18, B4GALT1, VCL, COPS4, DAZAP1, ATP6V1H, GADD45B, FN1, FRRS1, KDELR3, SMAP1, TES, IL10, CUL2, MYC, GSTM3, BTG2, IL27RA, TNFAIP2, UTP4, DUSP1, ANKRD28, PPP3CA, NUPR1, IER3, HLA-A, IL1RN, NFKBIZ, PPP1R15A, ATP13A3, CDKN1A, ETF1, ZFP36L1, DNAJB6, KCTD12, CTPS1, SLC20A1, TOP1, CAVIN1, IRF1, PTGS2, KRAS, CD14, PIM1, C2CD2, EIF5, JUNB, CLTC, CD83, …	C7	IMMUNESIGDB	Genes up-regulated in T reg: peripheral lymph nodes versus thymic CD24 high [GeneID=100133941].
NIKOLSKY_BREAST_CANCER_7P22_AMPLICON	2.9461e-05	0.00186397	0.57561	0.586183	2.17813	34	C7orf50, SUN1, FBXL18, FOXK1, SNX8, AMZ1, IQCE, INTS1, LFNG, MAFK, ADAP1, GPR146, GPER1	C2	CGP	Genes within amplicon 7p22 identified in a copy number alterations study of 191 breast tumor samples.
GOBP_TUBE_DEVELOPMENT	2.94748e-05	0.00186397	0.57561	-0.220356	-1.43946	852	PAX8, AHI1, ZNF304, IFT140, PIK3CG, CRLF1, ARG2, SERPINF1, CYP1B1, CNMD, CREB1, ITGA5, COL8A1, ODAD4, SPHK1, GJC1, PAK1, FOXC2, CYP1A1, EPCAM, KLF2, LIAS, ASS1, ALDH1A2, ADAMTS2, HOPX, PDCD6, OSR1, ROCK2, FZD2, COL3A1, KDR, FOXC1, COL18A1, ADAMTS1, RAB3A, GPX1, BRIP1, NRP1, THBS1, ANXA1, GRN, PFN1, NPHP3, NTN1, B4GALT1, ATP2B4, TGFBI, DCN, PTK7, CITED2, CCN3, SPINT1, GDF7, WNT6, JAG1, FN1, LEPR, …	C5	GO:BP	The process whose specific outcome is the progression of a tube over time, from its initial formation to a mature structure. Epithelial and endothelial tubes transport gases, liquids and cells from one site to another and form the basic structure of many organs and tissues including lung and trachea, kidney, the mammary gland, the vascular system and the gastrointestinal and urinary-genital tract…
GOBP_LEUKOCYTE_CHEMOTAXIS	2.95239e-05	0.00186397	0.57561	-0.334918	-1.84693	179	PIK3CG, PPIB, MCU, PPBP, LGMN, CCL19, THBS1, ANXA1, CCN3, PIKFYVE, CAMK1D, JAML, IL10, DPP4, VAV1, GAS6, NINJ1, C3AR1, VEGFA, AIF1, GPSM3, CCR5, DUSP1, CCL5, SPI1, PGF, SYK, NUP85, CCL4, GBF1, FOLR2, CSF3R, SAA1, CCL3, CSF1R, LGALS9, CXCL12, MSMP, IL16, CD74, NCKAP1L, MAPK3, CORO1A, CCR1, S100A12, ADAM8, PDGFB, CX3CL1, WNT5A, FCER1G, ALOX5, CALR, HRH1, RARRES2, IL17RA, MDK, ARHGEF5, LYN, LYST, CX…	C5	GO:BP	The movement of a leukocyte in response to an external stimulus. [GOC:add, GOC:jl]
GOBP_CELLULAR_RESPONSE_TO_OXYGEN_CONTAINING_COMPOUND	2.96805e-05	0.00186929	0.57561	-0.213725	-1.4067	960	PRNP, COL1A1, SSTR3, PIK3CG, RDH12, AP3S1, MPC2, SERPINF1, FBLN5, IMPACT, CYP1B1, CREB1, IGF2, SPHK1, COL1A2, SOCS3, FOXC2, ADPRS, GOT1, RAB11FIP5, KLF2, FCGR2B, WNT3, APP, RYR3, ASS1, ALDH1A2, HTR7, CYP26B1, OSR1, ROCK2, PTGFR, COL3A1, AKR1C1, PPP3CB, CDK1, OSBP, RAB8B, PPBP, GPX1, LGMN, HLA-DRB1, BRIP1, TXN, ADIPOR1, CEBPB, ANXA1, ANO1, SESN1, APEX1, OPRM1, CD6, CD180, ATP2B4, WNT9A, PTK7, GNA1…	C5	GO:BP	Any process that results in a change in state or activity of a cell (in terms of movement, secretion, enzyme production, gene expression, etc.) as a result of an oxygen-containing compound stimulus. [GOC:pr, GOC:TermGenie]
GSE360_L_DONOVANI_VS_B_MALAYI_HIGH_DOSE_DC_UP	3.07161e-05	0.00192982	0.557332	-0.336056	-1.83453	167	IFT140, FXR2, ALDH1B1, RAB11FIP5, ALDH1A2, HTR7, HOPX, PCDHB11, RNF19B, B4GALT1, BID, PLXNC1, GADD45B, EPB41L3, AQP9, CACYBP, MAP3K14, UGP2, PLK3, BTG1, PHACTR1, CST7, NINJ1, VEGFA, NBN, SLC2A3, IER3, CCL4, AP3M2, KLF6, FCGR2A, DMXL2, STX11, CCL3, IL1RN, CADM1, BASP1, PRELP, CACNB1, PNRC1, SMYD5, ZFP36L1, CSF2RB, WNT2B, TFPI, CD86, RHCE, LDHA, ITGB3, ENO2, CAMK2B, BCL2A1, LILRB4, AKR1B1, GPR183, …	C7	IMMUNESIGDB	Genes up-regulated in comparison of dendritic cells (DC) exposed to L. donovani versus DCs exposed to 50 worm/well B. malayi.
NAKAYA_PBMC_FLUARIX_FLUVIRIN_AGE_18_50YO_CORRELATED_WITH_HAI_28DY_RESPONSE_AT_3DY_POSITIVE	3.11544e-05	0.00195248	0.557332	-0.264635	-1.60719	392	AP3S2, FAR2, ATP10D, JPT1, PAK1, CHST15, GLRX, CAPZB, PRKAR1A, QPCT, RNF149, GRN, SLC38A10, SECTM1, PLXNC1, ADCY7, GCNT2, AQP9, MAP2K3, IFI30, JAML, GNS, KDELR2, SUSD1, FGL2, APOBR, VAV1, SIRPB2, OGDH, CD300A, HCK, TNFAIP2, CFD, LST1, ATP6V1B2, NCF1, PRKACA, M6PR, TBXAS1, CCR5, TOR1A, APLP2, PRAM1, ARPC1B, TNFRSF1A, HK1, FGD2, WBP1L, S100A11, NADK, SYK, KCNMB1, VRK3, IFNGR2, POU2F2, CD53, LYL1, P…	C7	VAX	Genes positively correlated with HAI response at 28d in peripheral blood mononuclear cell in adults (18-50) after exposure to Fluarix/Fluvirin , time point 3D. Comment: Supplementary Table 5: All genes whose expression (d3/d0 or d7/d0) correlates to the fold increase in HAI titers (d28/d0).
DESCARTES_FETAL_MUSCLE_MYELOID_CELLS	3.12276e-05	0.00195248	0.557332	-0.39532	-1.98248	104	HLA-DQA1, HLA-DQB1, CIITA, SIGLEC1, LILRB5, HLA-DRB1, GNA15, CD209, MS4A6A, JAML, PLD4, C2, HLA-DRA, SIRPB2, HCK, BLNK, TLR6, FAM20A, C3AR1, AIF1, RASGRP4, CD163L1, SPI1, CYTH4, FGD2, ITGAM, FOLR2, MNDA, CSF1R, CD200R1, GLIPR1, CD74, FLT3, ADAP2, CASP1, HMOX1, IRF8, GLT1D1, SIGLEC11, CLEC7A, CD86, C1QA, C1QC, HRH1, CD14, KYNU, NCF2, CD83, SLC7A8, IRF5, TEC, LY86, MS4A4A, TLR1, NOXA1, NFAM1, PLA2G7	C8		descartes DE_gene_by_organ.csv, fold.change>5, qval<0.05, pval<0.05
GOCC_CELL_SUBSTRATE_JUNCTION	3.15805e-05	0.00196904	0.557332	-0.263857	-1.60938	401	PCBP2, STX16, ITGBL1, ITGA5, ALKBH6, CD151, PAK1, TSPAN4, RPL5, LMO7, TPM4, FBLIM1, PHLDB2, FZD2, PPIB, SVIL, SORBS2, WASF1, NRP1, ANXA1, LPP, OPRM1, PFN1, VCL, FLOT2, PTK7, YWHAB, PDLIM7, TGFB1I1, PVR, PROCR, DAB2, TES, ALOX15B, PLAU, CNN2, RPL23, ARPC2, AJUBA, DPP4, G3BP1, SLA, LASP1, RPL19, SRP68, HCK, ACTB, YWHAZ, LCP1, PARVG, RPS3, ARPC1B, NEXN, ACTG1, ACTR2, HSPG2, PTPRC, ACTC1, MCAM, PI4KA…	C5	GO:CC	A cell junction that forms a connection between a cell and the extracellular matrix. [GOC:aruk, GOC:bc, GOC:hb, GOC:mah, PMID:10419689, PMID:1643657, PMID:16805308, PMID:26923917, PMID:8314002]
GSE2405_0H_VS_1.5H_A_PHAGOCYTOPHILUM_STIM_NEUTROPHIL_UP	3.16673e-05	0.00196904	0.557332	-0.329812	-1.81306	176	CCL28, BATF3, FMOD, VSTM2L, CTSV, TAGLN, SPHK1, COL1A2, MYH11, SLIT1, GALNT18, CTSB, COL3A1, PRDM6, MGP, CFB, RCN1, C1R, PSMB3, HRC, ALDOA, CFD, RAB3IL1, AIF1, PPA1, RHBDF2, CEBPZOS, NUPR1, RASSF3, HSPG2, S100A11, CD53, S100A10, PGM1, CD200R1, SNCA, SLC25A4, PRELP, RAC3, GPX3, CHCHD10, TMEM176B, IFITM2, CSTB, FCGRT, NQO1, CCDC80, IRF1, DACT2, RARRES2, OLFML2B, CTSC, EHD2	C7	IMMUNESIGDB	Genes up-regulated in polymorphonuclear leukocytes (1.5h): control versus infection by A. phagocytophilum.
SASSON_RESPONSE_TO_GONADOTROPHINS_DN	3.17723e-05	0.00196904	0.557332	-0.429711	-2.08746	86	ACTG2, ACTA2, TPM2, TP53I11, REXO5, ARL6IP5, THBS1, VCL, ADCY7, CAP2, STK24, DAB2, MAP2K3, DUSP14, CARD10, PI4K2A, KRT18, GEM, GBP1, ATP2A2, ACP5, NPC2, CASP4, ACTN1, RGS4, ITGA3, PTPRE, DHRS3	C2	CGP	Genes down-regulated in primary granulosa cells after stimulation with LH or FSH gonadotrophic hormones for 24 h.
GSE35825_UNTREATED_VS_IFNG_STIM_MACROPHAGE_UP	3.17967e-05	0.00196904	0.557332	-0.325054	-1.79851	185	CD47, RAB22A, STAT4, ITGA5, GRHL1, FGD5, RNF19B, VCL, B4GALT5, PIK3R5, TUBB6, PLEK, CHAC1, JAG1, PROCR, HMGCS1, CSF3, NR4A3, PDPN, MARCHF5, OSGIN2, RHBDF2, TRIM5, KIF3C, SYK, HLA-B, FRMD6, SLC7A2, STX11, SAA1, IL1RN, ACP5, SYNPO2, CASP4, RHOF, SAMSN1, C3, TIMP3, ACTN1, CDKN1A, ADAR, PNRC1, HSPA1B, HK2, BCL3, SLC16A3, SPTLC3, TPI1, SH3BP2, HILPDA, MAP3K8, GCH1, PTGS2, EBI3, NOCT, BCL2A1, GPR183, E…	C7	IMMUNESIGDB	Genes up-regulated in bone marrow-derived macrophages: untreated versus stimulated by IFNG [GeneID=3458].
REACTOME_ACTIVATION_OF_NMDA_RECEPTORS_AND_POSTSYNAPTIC_EVENTS	3.22077e-05	0.001987	0.557332	-0.421654	-2.01836	80	PRKAB1, APBA1, CREB1, DLG4, KPNA2, PRKAR1A, ERBB4, TUBB6, PPM1E, GRIA1, TUBA1C, PRKACA, GRIA4, TUBB4B, PRKAR2A, DLG2, MAPK3, PRKAG2, CALM1, TUBA8, CAMK2D, KRAS, CAMK2B, RPS6KA1, CAMK4, TUBB2B, RASGRF2, GRIN2B, NEFL, PDPK1, PRKACB, GRIN3A, CAMKK2, CAMK1, GRIN2A, KIF17, ADCY8, PRKAR1B, CAMK2G, GRIN1, TUBA1B, SRC	C2	CP:REACTOME	Activation of NMDA receptors and postsynaptic events
GSE21360_PRIMARY_VS_TERTIARY_MEMORY_CD8_TCELL_DN	3.22403e-05	0.001987	0.557332	-0.331325	-1.8241	178	CD47, STAT4, SOCS3, CIITA, CYP1A1, SERPING1, TXN, RNF19B, MR1, ISG20, B4GALT5, RCN1, FCGR1A, SECTM1, PLEK, GADD45B, CERS6, RBMS1, FYB1, TNFAIP2, SEPHS2, MAN1A1, GEM, GBP1, CCL5, GUCY1A1, TNFRSF1A, JUN, RHOH, PTPN6, PTGER4, PLAAT4, CUL1, CCRL2, CASP4, BATF, XPNPEP1, LCP2, IFITM1, CDKN1A, PDGFB, UBE2L6, NRP2, XBP1, IRF8, P2RX4, GBP2, TRIM25, ATP1B1, IRF1, TBC1D2B, PIM1, NUCB1, BCL2A1, C1QB, PTAFR, …	C7	IMMUNESIGDB	Genes down-regulated in memory CD8 T cells: 1' versus 3'.
GOBP_RESPONSE_TO_BACTERIUM	3.24169e-05	0.00199314	0.557332	-0.253458	-1.56172	448	SLPI, ARG2, COCH, GNLY, TNFSF8, CYP1A1, FCGR2B, LIAS, ASS1, UPK1B, PCSK1, PTGFR, PPBP, CHIT1, GPX1, HLA-DRB1, CEBPB, MR1, GRN, OPRM1, CD6, CD180, CYP2E1, CNR1, MRC1, MAP2K3, SELE, OPRK1, CSF3, GJB2, IL10, CD24, C2, AKIRIN2, TUSC2, DEFB1, HCK, TLR6, WFDC3, FAM20A, IL27RA, CFD, H2BC12, MICA, TNFRSF1B, IL18, CCR5, CYRIB, CCL5, TRIM5, SPI1, H2BC11, TNFRSF1A, CD68, NLRP1, STAB1, SYK, HLA-B, NOS3, BMP6…	C5	GO:BP	Any process that results in a change in state or activity of a cell or an organism (in terms of movement, secretion, enzyme production, gene expression, etc.) as a result of a stimulus from a bacterium. [GOC:hb]
GOMF_MICROTUBULE_MOTOR_ACTIVITY	3.29079e-05	0.00201853	0.557332	0.499965	2.10861	59	KIFC3, KIF25, DYNC2H1, KIF22, KIF19, KIF6, KIF1C, KIF15, STARD9, KIF16B, KIF13B, DNAH1, DNHD1, CENPE, DNAH6, KIF1B, DNAH10, KIF27, KIF13A, KIF5A, KIF2A, KIF4B, KIF12	C5	GO:MF	A motor activity that generates movement along a microtubule, driven by ATP hydrolysis. [PMID:19686686, PMID:32684327, PMID:32842864]
CHIARADONNA_NEOPLASTIC_TRANSFORMATION_CDC25_UP	3.38035e-05	0.00206857	0.557332	-0.389419	-1.95057	103	CRABP1, LTBP2, CDO1, IMPACT, CYP1B1, IGF2, LMO7, PHLDB2, CTSB, MGP, PLA2R1, CEBPB, THBS1, AOX1, PDPN, IGSF10, SEPHS2, CEBPD, MNDA, SMOC2, LXN, GREM2, CASP4, C3, APBB1IP, MYL12A, ATP13A3, IL1RL1, RAB11A, F2R, TMEM176B, IL1R1, GTF2A2, TOP1, PTX3, LSP1, ENO2, PTEN, NOCT, TMEM176A, TWIST1, LAMA4, PLSCR1, SRRT, NPNT, LOXL1, VCAM1, HSP90B1	C2	CGP	Genes up-regulated in reverted NIH3T3 cells (fibroblasts transformed by activated KRAS [GeneID=3845] which then reverted to normal cells upon stable over-expression of a dominant negative form of CDC25 [GeneID=5923]) vs normal fibroblasts.
PID_IL12_2PATHWAY	3.45749e-05	0.00211078	0.557332	-0.512711	-2.21156	49	STAT4, PPP3CB, STAT6, GADD45B, MAP2K3, MTOR, HLA-DRA, MAP2K6, IL12RB1, IL18, CCR5, PPP3CA, CCL4, ATF2, CCL3, HLA-A, IL18R1, CD4, IL1R1, MAPK14, CD3E, FOS, B2M, STAT1, NOS2, STAT3, RAB7A, HLX	C2	CP:PID	IL12-mediated signaling events
GSE10325_BCELL_VS_MYELOID_DN	3.47276e-05	0.00211511	0.557332	-0.329702	-1.81902	182	CYP1B1, FAR2, PAK1, CTSB, QPCT, CEBPB, BID, TGFBI, SECTM1, GNA15, MS4A6A, AQP9, CTSA, GNS, FGL2, CD300A, CPD, OASL, S100A4, TNFAIP2, CFD, C3AR1, LST1, VNN1, CD302, AIF1, CEBPD, TNFRSF1B, MYO1F, TBXAS1, CCR5, DUSP1, RPH3A, ACTG1, KCNMB1, FCGR2A, CSF1R, IL1RN, BLVRB, ADGRE1, AOAH, TBC1D8, ADA2, RNPEP, CCR1, HEXB, PRKCD, PTPRE, CASP1, HMOX1, PGAM1, CLEC7A, KCTD12, COTL1, CTBP2, BLVRA, FCGRT, C15orf3…	C7	IMMUNESIGDB	Genes down-regulated in comparison of healthy B cells versus healthy myeloid cells.
GSE9988_LPS_VS_LPS_AND_ANTI_TREM1_MONOCYTE_DN	3.50638e-05	0.00213058	0.557332	-0.338389	-1.848	168	ATP6V1D, TLNRD1, TDRD9, TMEM65, DPH5, SCG5, TXN, CEBPB, MOAP1, NAA50, CDC42EP3, ATP6V1H, DAB2, COL15A1, AKIRIN2, NUDT4, BAG3, MAPK13, NEDD4L, SLC9B2, S1PR3, ATP6V1B2, GEM, ANKRD28, GFOD1, CD68, SLC19A2, ACVR1, SLC3A2, RGS1, CD84, NRIP3, SMIM13, TMEM181, MMP19, CCR1, PRKAG2, TNFRSF12A, PTPRE, RRAD, CSTB, LPL, ANKRD10, LHFPL2, DYRK3, HAVCR2, ZC3HC1, ZBTB2, BRI3, HES4, NRROS, ACSL3, KLHL21, ZBTB21, …	C7	IMMUNESIGDB	Genes down-regulated in comparison of monocytes treated with 5000 ng/ml LPS (TLR4 agonist) versus monocytes treated with anti-TREM1 [GeneID=54210].
VART_KSHV_INFECTION_ANGIOGENIC_MARKERS_UP	3.62125e-05	0.00219523	0.557332	-0.365505	-1.93768	137	FRZB, SERPINF1, FGFR1, SPHK1, EPHA6, EPHA10, KDR, COL18A1, NRP1, JAG1, COL15A1, IL10, PLAU, EFNA1, BTG1, LPA, TNFAIP2, COL4A2, VEGFA, IL18, CCR5, CCL5, STAB1, PGF, NOS3, PDGFD, MMP2, CXCL12, CCN1, TIMP3, MMP19, HMOX1, PDGFB, NRP2, F2R, WNT2B, NPR1, WNT5A, CALR, ITGB3, PTGS1, PTGS2, PTEN, PECAM1, CXCR4, CXCL5, COL4A3, TGFB1, CXCR1, SFRP4, EPHA4, ENG, SFRP2, GRB2, SPARC, CXCL2, ANGPTL1, FGF1, IL6, …	C2	CGP	Angiogenic markers up-regulated in lymph endothelial cells upon infection with KSHV (Kaposi's sarcoma herpes virus).
GSE29618_BCELL_VS_PDC_DN	3.63207e-05	0.00219664	0.557332	-0.332408	-1.83309	179	AHI1, LILRA4, SSX2IP, SERPINF1, TPM2, APP, PPIB, CTSB, GPX1, LGMN, TXN, NRP1, VAMP8, TNFRSF21, GNA15, IQGAP2, PLEK, DAB2, DPP4, GAS6, CD300A, SOX4, CYTH4, UFD1, IL18R1, TM9SF2, NPC2, GLIPR1, DHRS7, MYL6, FLT3, MYL12A, HERPUD1, IGF2R, PTPRE, IRF8, CSF2RB, RPN1, SLC20A1, EPHA2, ALOX5AP, LHFPL2, CTSC, PTGDS, SEMA3C, LILRB4, CUX2, MYDGF, MILR1, MCM6, MGST2, EIF4A3, MLF2, NAGA, DUSP5, RRBP1, TRIP10, A…	C7	IMMUNESIGDB	Genes down-regulated in comparison of B cells versus plasmacytoid dendritic cells (pDC) .
GSE34006_UNTREATED_VS_A2AR_AGONIST_TREATED_TREG_DN	3.67657e-05	0.00221837	0.557332	-0.332974	-1.82859	173	PCBP2, ORAI1, CRLF1, IRF6, SOCS3, MRPL45, FHIP1B, PRKAR1A, HSP90AB1, PPP3CB, KIAA0319L, RAB3A, ADIPOR1, EHBP1L1, SLC29A1, PPP1R14C, CTSA, RER1, ARPC2, BTG1, ACTB, SLC2A3, CCR5, ACTG1, RHOH, PDIA4, DIAPH1, CDKN2D, CCL4, MTCH1, PTPN6, NAGK, LPCAT1, CD37, MYO1G, SNTB2, CORO1A, GMIP, METRNL, MAP4K1, IL1RL1, MMD, AKNA, CHCHD10, CEMIP2, CTPS1, SLC20A1, FCGRT, SERPINE2, ATP1B1, HPCAL1, UBE2D3, GABARAPL1…	C7	IMMUNESIGDB	Genes down-regulated in T reg: untreated versus ZM 241385 [PubChem=176407].
LU_AGING_BRAIN_DN	3.70785e-05	0.00223204	0.557332	-0.355055	-1.89836	145	NAPG, NUDT21, PAK1, RAB3A, RNF19B, TNFRSF21, PCMT1, TIMM17A, ATP6V1H, PPM1E, CAP2, PIK3CB, MTOR, SRSF10, HTR2A, GRIA1, RAB6A, VDAC1, GNB5, YWHAZ, ATP2A2, MAP1B, ATP6V1A, CALB1, CORO1A, RGS4, RAN, CALM1, GAD1, PLEKHB2, TAGLN3, TPBG, TGOLN2, NECTIN3, MAP2, CALB2, CAMK4, ETS2, CCKBR, INPP4A, CDC40, SFPQ, AZIN1, KLHDC3, PARM1, ITPKA, PTPRO, CLTB, GABRD, PDE4D, HSPA8, MAP2K4, PLD3, SST, NSG1, PITPNB, …	C2	CGP	Age down-regulated genes in the human frontal cortex.
TRAVAGLINI_LUNG_NEUTROPHIL_CELL	3.72376e-05	0.00223641	0.557332	-0.271917	-1.61441	315	R3HDM4, ULK1, COX6B1, SOCS3, UBE4A, CHST15, KLF2, CEBPB, RNF149, B4GALT1, B4GALT5, RGS18, PLXNC1, PDLIM7, PGD, AQP9, JAML, ARRB2, PLK3, SLA, GNAI2, NIBAN1, CPD, TLR6, BTG2, CEBPD, MYO1F, NCF1, RASGRP4, SLC2A3, MEFV, DUSP1, PPP3CA, SPI1, CASP2, RASSF3, TNFRSF1A, S100A11, HLA-B, POU2F2, FCGR2A, MNDA, CSF3R, TYROBP, SMAP2, UNC13D, PI4KA, CCDC88B, NBEAL2, SOD2, SAMSN1, MYL6, BASP1, PKM, VNN2, LCP2, A…	C8
GSE2405_0H_VS_3H_A_PHAGOCYTOPHILUM_STIM_NEUTROPHIL_UP	3.74335e-05	0.00224298	0.557332	-0.3309	-1.82456	180	LTBP2, ACTG2, COL1A2, CIITA, MYH11, OLFML2A, RAB11FIP5, HTR7, GALNT18, COL6A3, FXYD6, SERPING1, FGD5, RNF19B, LAMC2, VCL, SPINT1, DAAM1, IGFBP3, PLD4, TTC39A, PDPN, C2, MAPK13, BLNK, GSTM3, COL4A1, IL18, APLP2, S100A11, SOD1, FCGR2A, MMP2, PLCG2, HFE, RNF144B, CASP4, PXDN, DLG2, SAA2, CASP1, RRAS, LY6H, CSF2RB, TMEM176B, KCTD12, IFITM2, ME1, SERPINE2, TMEM51, TGM2, ALOX5AP, GPX8, NCKAP1, LYN, ASN…	C7	IMMUNESIGDB	Genes up-regulated in polymorphonuclear leukocytes (3h): control versus infection by A. phagocytophilum.
GOBP_EXPORT_FROM_CELL	3.7664e-05	0.00225158	0.557332	-0.224693	-1.44413	701	PAX8, SNAP47, PIK3CG, SLC32A1, SLC47A1, LTBP2, APBA1, BRSK1, MPC2, HYAL3, CREB1, STX1A, PAFAH1B1, PAK1, SLC17A9, RAB11FIP5, FCGR2B, SCG5, PCSK1, RAB27B, POMC, RAB25, SLC47A2, PPP3CB, OSBP, RAB8B, MCU, RAB3A, HLA-DRB1, SYT7, ANXA1, RAB3D, ANO1, VAMP8, OPRM1, OTOF, ARFGEF2, PLEK, CCN3, VIP, UNC13A, C1QTNF1, CNR1, MIA3, DAB2, TPH1, OPRK1, SYTL3, NR4A3, EXOC8, KCNN4, HTR2A, CD300A, MAP2K6, HCK, SOX4,…	C5	GO:BP	The directed movement of some substance from a cell, into the extracellular region. This may occur via transport across the plasma membrane or via exocytosis. [GOC:pg]
GSE360_L_MAJOR_VS_B_MALAYI_LOW_DOSE_DC_UP	3.83791e-05	0.00228602	0.557332	-0.336169	-1.83026	164	PAX8, PHF1, GPS2, CAND1, STAT4, STX1A, ADSS2, ALDH1A2, PTGFR, TXN, ADAM23, SUMO3, UGP2, LTK, PTGIS, DPP4, TMED3, BTG1, CFD, TMEM115, NINJ1, SF3B3, TNFRSF1B, SEC13, SLC2A3, PRSS23, IER3, ARHGDIA, CCL3, SPINT2, SOD2, SLC5A3, OLFM4, BASP1, PPP1R15A, XBP1, ZNF337, GBE1, WNT2B, GBP2, SERPINE2, FNDC3A, IFITM3, RRAGA, PIM1, AKR1B1, NIT1, CXCR4, INHBA, LDAF1, CELF2, INSIG2, CRIM1, PEX6, SLC11A1, LOXL1, H…	C7	IMMUNESIGDB	Genes up-regulated in comparison of dendritic cells (DC) exposed to L. major versus DCs exposed to 5 worms/well B. malayi.
REACTOME_HCMV_LATE_EVENTS	3.84168e-05	0.00228602	0.557332	0.41037	1.93528	109	H2AC4, NUP54, CHMP3, H3C3, H2BC3, H4C2, H2BC9, H2AC11, H2BC7, H2AC12, H3C7, NUP133, H3C2, H2AC17, H2BC17, H2AC14, H4C13, H3C8, H3C11, H4C14, MVB12B, H2AC13, VPS4A	C2	CP:REACTOME	HCMV Late Events
GOBP_WOUND_HEALING	3.87888e-05	0.00230286	0.557332	-0.271014	-1.62474	350	COL1A1, PIK3CG, ITGA5, DSP, ACTA2, CD151, PAK1, FOXC2, MYL9, PHLDB2, COL3A1, KDR, CCN4, RAB3A, GPX1, SERPING1, SYT7, THBS1, ANXA1, F13A1, OPRM1, B4GALT1, VCL, F10, PTK7, VTN, PLEK, C1QTNF1, FN1, MIA3, PROCR, CLIC1, JAML, PIK3CB, PLAU, PDPN, CNN2, AJUBA, MTOR, VAV1, GAS6, VEGFA, CHMP4C, ACTB, SERPIND1, TOR1A, F11R, LCP1, MMRN1, PPP3CA, ARL8B, LOX, FBLN1, ACTG1, SYK, RAP2B, NOS3, TPM1, FGFR1OP2, TH…	C5	GO:BP	The series of events that restore integrity to a damaged tissue, following an injury. [GOC:bf, PMID:15269788]
REACTOME_SMOOTH_MUSCLE_CONTRACTION	3.93685e-05	0.00233193	0.557332	-0.562008	-2.23558	35	ACTG2, ACTA2, PAK1, MYH11, TPM2, MYL9, TPM4, ANXA1, VCL, ANXA2, GUCY1A1, TPM1, MYL12B, MYL6, MYL12A, CALM1	C2	CP:REACTOME	Smooth Muscle Contraction
HELLER_SILENCED_BY_METHYLATION_DN	3.96385e-05	0.00234256	0.557332	-0.389996	-1.94663	100	CTH, RFPL2, SLC47A1, LSAMP, EIF4EBP1, P2RX5, GOT1, CEBPB, THBS1, CHAC1, BAG3, NIBAN1, MYC, LAPTM5, MAP1B, PTPRC, SLC3A2, SLC5A3, SEC24D, PPP1R15A, CLGN, HMOX1, HSPA1B, SHMT2, MAF, HSPA1A, ASNS, IDH1, ADRB2, TNFRSF17, JCHAIN, RCAN2, AAK1, WARS1, DNAJB9, TXNDC5, HSP90B1, GDF15, HSPA6, HSPH1, TOX3, PPARGC1A	C2	CGP	Genes down-regulated in at least one of three multiple myeloma (MM) cell lines treated with the DNA hypomethylating agent decitabine (5-aza-2'-deoxycytidine) [PubChem=451668].
JINESH_BLEBBISHIELD_TRANSFORMED_STEM_CELL_SPHERES_UP	4.18564e-05	0.00246516	0.557332	-0.349913	-1.8629	140	RAB22A, SLC16A5, CYP1B1, CEMIP, MLPH, ASS1, RAB27B, CTSB, TXN, THBS1, ANXA1, LAMC2, AGPAT2, TNFRSF21, PGD, IGFBP3, SPOCD1, CCDC28A, SRSF7, FYB1, DEFB1, NIBAN1, ANXA2, GPAT3, ATP2A2, MFSD1, SMIM14, IFNGR2, B4GALT4, KLF6, SLC7A2, LXN, SOD2, ABHD2, HMOX1, JAK1, HSPA1B, SAMD9, WNT5A, NQO1, ANKRD10, HSPA1A, PIM1, PTGR1, LAMB3, KYNU, WIPI2, GSDME, CYP3A5, GLS, ABHD3, SERPINE1, AZIN1, CHMP1B, IL7R, PCDH…	C2	CGP	Genes up-regulated in transformed spheres compared to blebbishields from RT4 cells
AIZARANI_LIVER_C5_NK_NKT_CELLS_3	4.19035e-05	0.00246516	0.557332	-0.388565	-1.93949	100	GNLY, SLC38A1, PFN1, PLEK, TAGAP, HCST, SYTL3, BTG1, SLA, FYB1, CST7, CNOT6L, CCL5, LCP1, GFOD1, SYK, PTPRC, CCL4, BIN2, CD53, PTGER4, TYROBP, PLAAT4, ITGAL, AOAH, DENND2D, IFITM1, RASSF5, CORO1A, ARHGDIB, AKNA, FCER1G, GNG2, ARHGAP9, ALOX5AP, PRKCH, CCL4L2, CD3E, CBLB, CXCR4, CD7, SRGN, RAC2, CELF2	C8
HAY_BONE_MARROW_NEUTROPHIL	4.21494e-05	0.00247401	0.557332	-0.25843	-1.57977	414	PRNP, TDRD9, COX6B1, OTUD1, CACNA2D4, FXYD6, GPX1, QPCT, THBS1, ANXA1, CNPY3, RAB3D, GRN, EHBP1L1, CDC42EP3, PGD, MS4A6A, AQP9, OAZ1, GNS, LRMDA, FGL2, APOBR, PSMB3, AKIRIN2, LTBR, ALDOA, GNAI2, CPD, LTA4H, SCPEP1, S100A4, TMSB10, VNN1, CD302, NCF1, RASGRP4, ANXA2, ACTB, PRKACA, SLC2A3, MEFV, DUSP1, APLP2, LCP1, GPAT3, DOCK2, PRAM1, EIF4E3, ACTR2, ATP2A2, STAB1, MFSD1, ITGAM, AP2S1, STXBP2, S100A…	C8
GSE28449_WT_VS_LRF_KO_GERMINAL_CENTER_BCELL_UP	4.26037e-05	0.00249502	0.557332	-0.338443	-1.83872	162	ZNF134, TRAPPC2B, PRKAB1, SIN3B, SSX2IP, LSR, AP3S2, COL8A1, ADH1B, BMP3, PCDHB11, CTSB, MGP, LGMN, LEPR, NR4A3, CD24, ELAVL4, IL1RL2, DLAT, BLNK, ZFP69B, CDC23, TNFRSF1B, H2BC11, SLC19A2, DMXL2, ACTC1, CD84, GSTA4, DHRS7, TBC1D8, CCR1, PACRG, ENTPD3, RND3, MGAT2, MAP3K8, DYRK3, HES1, PLCH1, CXCL5, AJAP1, NCF2, PLPPR4, ITPR3, IRAK3, ACP3, FZD1, OPCML, KLHDC3	C7	IMMUNESIGDB	Genes up-regulated in germinal center B lymphocytes: wildtype versus ZBTB7A [GeneID=51341] knockout.
GOBP_REGULATION_OF_DEFENSE_RESPONSE	4.28241e-05	0.00249913	0.557332	-0.248233	-1.54124	483	PCBP2, CD47, GPS2, PIK3CG, ARG2, TLR10, COCH, SERPINF1, NDFIP1, SPHK1, SOCS3, PAK1, FCGR2B, APP, MFHAS1, HSP90AB1, CCN4, GPX1, HLA-DRB1, SERPING1, POLR3B, CEBPB, ANXA1, GRN, VAMP8, PVR, CCN3, CNR1, KARS1, SELE, ARRB2, IL10, APOBEC3G, APOBEC3F, FGL2, PTGIS, AKIRIN2, VAV1, IL1RL2, MAPK13, HCK, IL12RB1, CST7, NINJ1, MICA, CFH, TNFRSF1B, IL18, NCF1, RHBDF2, GPSM3, MEFV, CCL5, TRIM5, SPI1, NUPR1, AP1G…	C5	GO:BP	Any process that modulates the frequency, rate or extent of a defense response. [GOC:mah]
GOBP_RESPONSE_TO_INTERFERON_GAMMA	4.28671e-05	0.00249913	0.557332	-0.390276	-1.95268	102	CD47, CIITA, ASS1, HSP90AB1, CCL19, MYO1C, MRC1, HCK, MYC, IL12RB1, AIF1, SP100, MEFV, GBP1, CCL5, ACTG1, ACTR2, CCL4, CCL3, LGALS9, CD74, SNCA, IFITM1, CASP1, JAK1, CX3CL1, IRF8, WNT5A, GBP2, IFITM2, ACTR3, IRF1, GCH1, IFITM3, GAPDH, RAB20, KYNU, SLC11A1, CDC42, PARP14, CCL3L3, STAT1, NOS2, CD40, NR1H2, NLRC5, GSN, BST2, STXBP1, CCL21	C5	GO:BP	Any process that results in a change in state or activity of a cell or an organism (in terms of movement, secretion, enzyme production, gene expression, etc.) as a result of an interferon-gamma stimulus. Interferon-gamma is also known as type II interferon. [GOC:add, ISBN:0126896631, PMID:15546383]
GSE7218_UNSTIM_VS_ANTIGEN_STIM_THROUGH_IGG_BCELL_DN	4.31429e-05	0.00250956	0.557332	-0.357642	-1.89066	135	H2AC15, SLPI, STAT4, HOPX, SERPING1, RNF19B, CD6, ISG20, SHISA5, GADD45B, SYTL3, ARHGAP15, CD300LF, CST7, TMSB10, CRIP1, TNFRSF1B, GEM, NUPR1, RHOH, APOD, BIN2, CD53, PTPN6, PTGER4, HAP1, CCL3, ITGAL, IL1RN, BLVRB, CCRL2, RGS1, CASP4, MYO1G, CD74, F2RL2, IFITM1, CORO1A, GSDMD, CSTB, GNG2, CHSY1, LSP1, PIM1, HAVCR2, LILRB4, SRGN, IRAK3, RAC2, GADD45A	C7	IMMUNESIGDB	Genes down-regulated in B lymphocytes: expressing IgM BCR [GeneID=613] fusion and untreated versus expressing IgMG BCR [GeneID=613] fusion and treated by anti-HEL.
GSE43955_1H_VS_42H_ACT_CD4_TCELL_UP	4.34228e-05	0.00251454	0.557332	-0.329532	-1.81702	180	PSMD4, POLR1C, CYP1A1, WNT3, CAPZB, RAB8B, FBXO21, PDLIM4, ADAMTS1, THBS1, VTN, UROD, PDPN, DKK3, TUSC2, EMC3, ELP3, DIABLO, CEBPD, NCF1, GEM, NSF, SKIL, PRIM2, RHOH, PTPN6, ELL, ACP5, MRPS10, TSPAN5, AOAH, RASSF5, UBE2F, ADAR, THRB, DGUOK, SH3BP2, ARHGAP9, C15orf39, HPCAL1, AFF4, GPR132, C1QB, RPP14, ADRB2, RRP1B, MOB2, RFK, IFI27, HIF3A, PSMB7, GCNT1, ITGA4, BTF3, ITGAX, IER2, LY86, KPNA4, NXN,…	C7	IMMUNESIGDB	Genes up-regulated in CD4 [GeneID=920] T helper cells Th0: 1h versus 42h.
GOBP_SECOND_MESSENGER_MEDIATED_SIGNALING	4.34229e-05	0.00251454	0.557332	-0.290622	-1.67312	249	PRNP, EFHB, ADGRL1, P2RX5, SPHK1, POMC, PTGFR, CASQ2, KDR, PPP3CB, MCU, HPCA, THBS1, ATP2B4, PLEK, CAP2, PLN, SELE, MTOR, NUDT4, HRC, DEFB1, CCR9, VEGFA, PRKACA, GLP1R, CCR5, NPR2, GBP1, PPP3CA, GUCY1A1, PPP2CA, ATP2A2, SYK, PTPRC, CCL4, NOS3, NFATC4, ADGRG6, CCL3, CCRL2, PLCG2, LAT2, CD4, CHP1, APLNR, CCR1, KCNC2, CALM1, PPP1R9A, P2RX4, NPR1, CLEC7A, PPP2R1A, ATP1B1, CAMK2D, HRH1, CD3E, CXCR4, S…	C5	GO:BP	Any intracellular signal transduction in which the signal is passed on within the cell via a second messenger; a small molecule or ion that can be quickly generated or released from intracellular stores, and can diffuse within the cell. Second-messenger signaling includes production or release of the second messenger, and effectors downstream of the second messenger that further transmit the sign…
GOMF_COLLAGEN_BINDING	4.37487e-05	0.00252776	0.557332	-0.463622	-2.10118	61	COCH, COL14A1, PAK1, COL6A2, PPIB, PCOLCE, CTSB, THBS1, TGFBI, DCN, C1QTNF1, FN1, CTSK, PCOLCE2, NID2, LOX, ADGRG6, LUM, PODN, ITGA3, SMAD7, MRC2, PDGFB	C5	GO:MF	Binding to collagen, a group of fibrous proteins of very high tensile strength that form the main component of connective tissue in animals. Collagen is highly enriched in glycine (some regions are 33% glycine) and proline, occurring predominantly as 3-hydroxyproline (about 20%). [GOC:ai, ISBN:0198506732]
WOO_LIVER_CANCER_RECURRENCE_UP	4.39546e-05	0.002534	0.557332	-0.390831	-1.94273	97	COL1A1, FGFR1, COL1A2, TPM2, TPM4, COL6A3, MGP, PLAGL1, JAG1, IGFBP3, DAB2, PLAU, ALDOA, E2F3, RGS10, TMSB10, CSGALNACT1, CRIP1, GEM, LOX, LPCAT1, RGS1, RHOF, PKM, PPT1, CCN2, POSTN, HK2, ENO2, SEMA3C, TPBG, TEAD4, MARCKS, COL11A1, PLCE1, LAMA5, TGFB1, TREM2, LAMA4, FZD1, RGS2, SLIT2	C2	CGP	Genes positively correlated with recurrence free survival in patients with hepatitis B-related (HBV) hepatocellular carcinoma (HCC).
HERNANDEZ_MITOTIC_ARREST_BY_DOCETAXEL_1_DN	4.43566e-05	0.00255149	0.557332	-0.570537	-2.21597	32	GLRX, CDK1, SLC29A1, FBXO5, TUBB, CKS1B, MAN1A1, CTHRC1, CDC6, GBE1, CDH11, MAF, SDC2, SNAI2, CDK2, RGS2, FHL2	C2	CGP	Genes down-regulated in MCF7 cells (breast cancer, normal TP53 [GeneID=7157]) undergoing mitotic arrest and apoptosis after treatment with 100 nM docetaxel [PubChem=148124].
GOBP_HEART_DEVELOPMENT	4.45015e-05	0.00255415	0.557332	-0.241335	-1.50309	494	PAX8, AHI1, BICC1, IFT140, MTERF4, CREB1, TMEM65, DSP, ODAD4, GJC1, FOXC2, MYH11, ALDH1A2, HOPX, OSR1, ROCK2, FZD2, TBX18, COL3A1, KDR, FOXC1, PRKAR1A, PPP3CB, SORBS2, CDK1, PKP2, PDLIM4, ADAMTS1, NRP1, NPHP3, MYH7, AKAP13, ERBB4, PTK7, CITED2, PDLIM7, ELN, JPH2, JAG1, FN1, PLN, MAP2K3, CACYBP, ARRB2, BMP4, MTOR, EFNA1, GJA5, SOX4, RBM24, LMO4, RUNX1, VEGFA, CRIP1, TNFRSF1B, SGCG, TNFRSF1A, LOX, …	C5	GO:BP	The process whose specific outcome is the progression of the heart over time, from its formation to the mature structure. The heart is a hollow, muscular organ, which, by contracting rhythmically, keeps up the circulation of the blood. [GOC:jid, UBERON:0000948]
MENON_FETAL_KIDNEY_9_ENDOTHELIAL_CELLS	4.46459e-05	0.00255677	0.557332	-0.399691	-1.97866	95	APP, TPM4, ROCK2, KDR, IGFBP4, NRP1, LPP, FN1, ARPC2, GNAI2, COL4A2, COL4A1, TMSB10, ANXA2, ACTR2, HSPG2, HLA-B, HLA-A, HLA-E, PXDN, CD74, TIMP3, MYL6, MYL12A, APLNR, CALM1, CLDN5, COTL1, IFITM2, ESAM, TM4SF1, PTTG1IP, GMFG, CAVIN1, IFITM3, PECAM1, LGALS1, EHD3, MARCKS, RRBP1, IGFBP5, IER2	C8
HOEK_NK_CELL_2011_2012_TIV_3D_VS_0DY_ADULT_3D_DN	4.48878e-05	0.00256494	0.557332	-0.315058	-1.78305	214	HLA-DQA1, LHFPL5, HLA-DQB1, HLA-DRB5, CIITA, CHST15, HLA-DRB1, CEBPB, F13A1, TGFBI, SECTM1, GNA15, SPINT1, TBC1D9, MS4A6A, IFI30, JAML, CD300LF, HLA-DRA, LTBR, SIRPB2, HCK, RETN, TNFAIP2, CFD, NIBAN2, AIF1, NCF1, RASGRP4, MEFV, DUSP1, PRAM1, SPI1, FGD2, JUN, STAB1, KCNMB1, CYP2S1, IFNGR2, LYL1, LRRC25, CEACAM4, MNDA, DMXL2, CSF3R, CES1, CSF1R, SPINT2, CD4, DLG2, CDKN1A, S100A12, ADAMTSL4, PID1, C…	C7	VAX	Genes down-regulated in natural killer cell 3d vs 0d in adults after exposure to 2011-2012 trivalent inactivated vaccine (A/California/7/09 (H1N1), A/Perth /16/2009 (H3N2), B/Brisbane/60/2008) , time point 3D. Comment: Down-regulated DE RNA transcripts (down >= 1.5x) shared between both TIV-vaccinated donors
ZHONG_SECRETOME_OF_LUNG_CANCER_AND_ENDOTHELIUM	4.53679e-05	0.00258667	0.557332	-0.466747	-2.13029	63	COL1A1, CTSV, GOT1, PPIB, COL18A1, CFB, IGFBP4, VCL, FN1, CTSA, TUBB, C2, ALDOA, TUBA1C, CLU, VCP, ACTB, YWHAZ, ARHGDIA, ACTC1, RAN, CX3CL1, YWHAG, TPI1, LDHA, TNXB, ENO1, GAPDH, CTSD, LGALS3BP, MDH2, CTSZ, VCAM1, IGFBP7, A2M, RPL10A, PEBP1	C2	CGP	Proteins secreted in co-culture of LKR-13 tumor cells (non-small cell lung cancer, NSCLC) and MEC stroma cells (endothelium).
TARTE_PLASMA_CELL_VS_PLASMABLAST_UP	4.55131e-05	0.00258924	0.557332	-0.273478	-1.62275	317	APOC2, HLA-DQA1, COL1A1, FMOD, LTBP2, FRZB, STX1A, NELL2, DLG4, COL14A1, CRABP2, PCOLCE, C1S, CFB, LGMN, QPCT, SERPING1, IGFBP4, GRN, OPRM1, MYO1C, SPTB, MIA3, DAB2, OAZ1, HLA-DOB, BMP4, CD24, SERPINA3, CCR9, TCN2, BTG2, RUNX1, TNFAIP2, COL4A1, CLU, HTR1E, LST1, ACTB, PLCB2, DUSP1, MYBPC2, HLA-B, TPM1, CEACAM4, ADORA3, CES1, ACTC1, MCAM, SPINT2, LGALS9, CXCL12, CHN1, IKBKE, SNCA, SGSH, TIMP3, IFI…	C2	CGP	Genes up-regulated in mature plasma cells compared with plasmablastic B lymphocytes.
GOBP_GRANULOCYTE_CHEMOTAXIS	4.58877e-05	0.00259737	0.557332	-0.402126	-1.97526	91	PIK3CG, PPIB, MCU, PPBP, CCL19, THBS1, ANXA1, PIKFYVE, CAMK1D, JAML, DPP4, VAV1, C3AR1, CCL5, SYK, CCL4, GBF1, CSF3R, SAA1, CCL3, CSF1R, CD74, NCKAP1L, MAPK3, S100A12, CX3CL1, FCER1G, HRH1, RARRES2, IL17RA, MDK, CXCL5, IL34, RAC2, RIPOR2, CXCR1, SLIT2, CXCR2, CCL3L3, CXCL8, TREM1, CCL21, CXCL2, S100A8, EDN3	C5	GO:BP	The movement of a granulocyte in response to an external stimulus. [GOC:rph]
PLASARI_TGFB1_TARGETS_10HR_UP	4.59175e-05	0.00259737	0.557332	-0.327775	-1.80455	178	CTH, ITGA5, SPHK1, FOXC2, PRKG2, ASS1, ALDH1A2, RNF149, RNF19B, WNT9A, GCNT2, PVR, ELN, GADD45B, JAG1, DUSP14, GJB2, PLK3, CARD10, HCK, RUNX1, ENTPD7, VEGFA, LRRC8C, LRRFIP1, GFOD1, IER3, FOXS1, COL8A2, MCAM, IL18R1, CDH6, GREM2, PRKAR2A, TIMP3, KLHDC8A, PPP1R15A, TNFRSF12A, CCN2, PDGFB, CX3CL1, HECTD2, HK2, SLC20A1, ITGB3, GCH1, PTGS2, SFN, SERP1, ADAM12, JUNB, LPIN3, INHBA, KCNK1, LIF, NFIL3, D…	C2	CGP	Genes up-regulated in MEF cells (embryonic fibroblast) upon stimulation with TGFB1 [GeneID=7040] for 10 h.
GOBP_SYNAPTIC_SIGNALING	4.60451e-05	0.00259737	0.557332	-0.230131	-1.46968	635	GABRA2, PRNP, SNAP47, KCNN1, SLC32A1, YTHDF1, APBA1, BRSK1, STX1A, DLG4, P2RX5, GJC1, PAFAH1B1, GABRB2, CYP46A1, NPFF, KPNA2, APP, HTR7, SORCS3, PCDHB11, PCDHB4, PPP3CB, PDLIM4, RAB3A, LGMN, SYT7, OPRM1, OTOF, GNA15, NPTX1, SLC29A1, BTBD9, UNC13A, ADARB1, SLC12A5, CNR1, CACNB4, ARRB2, OPRK1, PNOC, SV2B, ELAVL4, LRRTM1, HTR2A, AKAP5, GRIA1, GNAI2, RETN, EFNB3, RGS10, PDYN, HTR1E, NMU, PRKACA, LAMA…	C5	GO:BP	Cell-cell signaling to, from or within a synapse. [GOC:dos]
BUSSLINGER_GASTRIC_ISTHMUS_CELLS	4.60573e-05	0.00259737	0.557332	-0.257691	-1.57525	414	PHACTR2, CYP1B1, COX6B1, DSP, CD151, JPT1, EPCAM, KLF2, MLPH, PSMA7, LMO7, TPM4, FBLIM1, RAB27B, CAPZB, ELOVL6, HSP90AB1, MCU, TXN, PSD3, RAB3D, ANO1, PFN1, B4GALT1, YWHAB, TFCP2L1, MIA3, CLIC1, HMGCS1, PTTG1, KDELR3, TES, KDELR2, TTC39A, ATP8B1, ARPC2, TUBB, HNRNPF, KRT18, LASP1, NUSAP1, TPX2, LMO4, TUBA1C, GARS1, NIBAN2, TMSB10, VCP, CRIP1, ANXA2, NMU, YWHAZ, LRRFIP1, CYC1, ACTG1, ACTR2, IER3, …	C8
TRAVAGLINI_LUNG_PLATELET_MEGAKARYOCYTE_CELL	4.6482e-05	0.00261562	0.557332	-0.245544	-1.53547	512	NSMCE3, R3HDM4, CD47, SLPI, ARG2, SSX2IP, NCK2, CD151, SPHK1, C19orf33, MAD2L1BP, EPCAM, APP, MYL9, GRHL1, TPM4, RAB27B, TRIM58, PDLIM4, PPBP, GPX1, SLBP, ADIPOR1, F13A1, VCL, UXS1, RGS18, PDLIM7, TGFB1I1, PLEK, OSBPL6, CYB5A, ISCA1, DAAM1, DAB2, CTSA, MAP2K3, CLIC1, IGFBP2, SPOCD1, OAZ1, PIK3CB, AKIRIN2, KRT18, MKRN1, EMC3, TUBA1C, ABCC4, CLU, RGS10, H2BC12, YIF1B, TMEM17, ACTB, GNB5, YWHAZ, CCL…	C8
RIGGI_EWING_SARCOMA_PROGENITOR_UP	4.65902e-05	0.00261603	0.557332	-0.260141	-1.58145	388	FMOD, SSBP4, STAT4, MFAP4, FRZB, SLC24A3, NELL2, CYP26B1, FBLIM1, TSPAN13, STMN3, ABCA5, RGS18, CITED2, PVR, GLCE, GDF7, JAG1, ADARB1, GLG1, IGFBP2, OLFML3, DKK2, PNOC, FAM43A, NPR3, KIAA1549L, SV2B, MAMDC2, RBM24, LMO4, BTG2, C3AR1, UHMK1, CRIP1, LAPTM5, S1PR3, SLC26A2, GRP, H2BC5, RAPH1, PGF, STING1, ITGAM, PTGER4, ST6GAL1, RCOR1, CES1, MCAM, STEAP2, RNASET2, PLCG2, HLA-E, BRINP1, DLG2, PGM2L1,…	C2	CGP	Genes up-regulated in mesenchymal stem cells (MSC) engineered to express EWS-FLI1 [GeneID=2130;2321] fusion protein.
HP_ABNORMALITY_OF_HUMORAL_IMMUNITY	4.71045e-05	0.00263918	0.557332	-0.308661	-1.73941	208	NSMCE3, PLVAP, HLA-DQA1, HLA-DQB1, COL1A1, STAT4, STX1A, CIITA, C1S, ERCC3, CFB, HLA-DRB1, GPR35, PMM2, MTOR, KCNN4, C7, BLNK, GSTM3, TCN2, IL12RB1, CFD, CFH, TNFRSF1B, NBN, CD27, NLRP1, SYK, STING1, STXBP2, FAS, MTHFD1, STX11, UNC13D, PLCG2, HFE, C3, NCKAP1L, MOGS, ADA2, PRKCD, HMOX1, KNSTRN, EDNRA, TNPO3, SAMD9L, SLC5A6, CTPS1, C1QA, CAVIN1, MGAT2, C1QC, DOCK8, KRAS, CD3E, PTEN, C1QB, CXCR4, TN…	C5	HPO	Abnormality of humoral immunity
MCDOWELL_ACUTE_LUNG_INJURY_UP	4.72246e-05	0.00264019	0.557332	-0.534287	-2.22119	42	SPHK1, COL3A1, TGFBI, ELN, SERPINA3, MYC, BTG2, DUSP1, SERPIND1, LOX, TPM1, KLF6, FCGR2A, CCN1, LTBP1, CDKN1A, CSTB, PTX3, SFN, LILRB4, FOS, STEAP4, PLA2G7, AKAP12, NDUFS1, S100A8, ZFP36, TNC, PTGES	C2	CGP	Genes up-regulated in the mouse model of acute lung injury induced by inhaling nickel sulfate [PubChem=24586].
WEINMANN_ADAPTATION_TO_HYPOXIA_UP	4.78709e-05	0.00266725	0.557332	-0.62028	-2.2525	25	CRLF1, COL3A1, NNMT, COL15A1, MAP2K6, NMU, TPM1, CADM1, GSTA4, CALM1, HMOX1, HSPA1B, SLC16A3, NQO1, LPL, TPBG, MARCKS, KCNK1, ID3	C2	CGP	Genes most up-regulated in hypoxia tolerant NCI H460 cells (lung cancer).
GOBP_EXOCYTOSIS	4.79755e-05	0.00266725	0.557332	-0.272725	-1.6187	316	SNAP47, PIK3CG, APBA1, HYAL3, STX1A, PAK1, SLC17A9, RAB11FIP5, FCGR2B, RAB27B, RAB25, PPP3CB, RAB8B, RAB3A, SYT7, ANXA1, RAB3D, VAMP8, OTOF, ARFGEF2, PLEK, UNC13A, CNR1, MIA3, TPH1, SYTL3, NR4A3, EXOC8, HTR2A, CD300A, HCK, GNAI2, TNFAIP2, ABCC4, RAB3IL1, SCAMP1, CCL5, PRAM1, SPI1, AP1G1, NSF, ARL8B, ATP2A2, CHRNA6, SYK, ITGAM, STXBP2, SNAP25, HAP1, STX11, CCL3, RAB11FIP1, SV2A, LGALS9, STEAP2, UN…	C5	GO:BP	A process of secretion by a cell that results in the release of intracellular molecules (e.g. hormones, matrix proteins) contained within a membrane-bounded vesicle. Exocytosis can occur either by full fusion, when the vesicle collapses into the plasma membrane, or by a kiss-and-run mechanism that involves the formation of a transient contact, a pore, between a granule (for exemple of chromaffin …
GSE26343_WT_VS_NFAT5_KO_MACROPHAGE_DN	4.80177e-05	0.00266725	0.557332	-0.32734	-1.80792	183	ARG2, SUGT1, SOCS3, GRHL1, STBD1, HLA-DRB1, RNF149, B4GALT5, TUBB6, PROCR, DUSP14, CSF3, IL10, NR4A3, PDPN, UBE2N, OASL, TNFAIP2, MARCHF5, OSGIN2, TNFRSF1B, RHBDF2, CCL5, ANKRD28, SYK, ERO1A, FAS, DAPP1, SLC7A2, SAA1, ACP5, SYNPO2, CASP4, BATF, RHOF, MYO1G, IKBKE, RCSD1, ACTN1, TENT5C, UBE2F, NRP2, PNRC1, SUB1, RRAD, HSPA1B, GBP2, TMEM176B, ANKRD17, SH3BP2, MAP3K8, SLC15A3, GPR132, EIF6, EBI3, GT…	C7	IMMUNESIGDB	Genes down-regulated in bone marrow-derived macrophages: wildtype versus NFAT5 [GeneID=10725] knockout.
GSE1112_HY_CD8AB_VS_HY_CD8AA_THYMOCYTE_RTOC_CULTURE_UP	4.87451e-05	0.00270186	0.557332	-0.339241	-1.82804	154	HLA-DQA1, HLA-DQB1, SLPI, TLNRD1, STX1A, TPMT, MARCO, NT5C1A, HM13, HLA-DRB1, RNF149, SECTM1, IQGAP2, RGS17, HLA-DRA, WFDC3, SCPEP1, IL12RB1, ERAP2, SLC2A3, GBP1, STING1, PLAAT4, LAT2, GREM2, CD74, LTBP1, CASP1, UBE2L6, SUB1, SAMD9L, PNMA8B, GBP2, USP15, PSMD12, IRF1, PHLDA2, MYOF, SLC31A1, PTGS2, ARHGEF5, CARD6, BCL2A1, CDON, STAP2, LGALS3BP, IER2, RRM2B, SH3BP5, CD59, VCAM1, CREM, SLAMF8, WARS1…	C7	IMMUNESIGDB	Genes up-regulated in CD8 alphabeta HY thymocyte RTOC culture versus CD8 alphaalpha HY thymocyte RTOC culture.
REACTOME_RUNX1_REGULATES_GENES_INVOLVED_IN_MEGAKARYOCYTE_DIFFERENTIATION_AND_PLATELET_FUNCTION	4.90099e-05	0.00271073	0.557332	0.434875	1.9762	88	H2AC4, H3C3, H2BC3, H4C2, H2BC9, H2BC7, H3C7, H3C2, PRKCQ, AGO4, AGO1, AGO3, H2AX, ZFPM1, H2BC17, TNRC6C, H2AC14, H4C13, H3C8, H3C11, H4C14	C2	CP:REACTOME	RUNX1 regulates genes involved in megakaryocyte differentiation and platelet function
GOCC_ENDOCYTIC_VESICLE	4.94694e-05	0.00273031	0.557332	-0.277896	-1.63958	297	RAB22A, HLA-DQA1, HLA-DQB1, GNLY, DLG4, SPHK1, HLA-DRB5, CEMIP, RAB11FIP5, WNT3, MARCO, FZD2, RAB8B, HLA-DRB1, SYT7, VAMP8, FLOT2, FCGR1A, ANXA11, MYO1C, PIKFYVE, CPNE6, WNT6, ARRB2, PLD4, CSF3, MTOR, DPP4, HLA-DRA, GRIA1, UBC, TLR6, ENTPD7, HEATR5B, NCF1, M6PR, GRIA4, ACTG1, ROR2, STAB1, SYK, HLA-B, NOS3, AP2S1, CACNG8, CSF3R, SAA1, RAB11FIP1, HLA-A, TYRP1, HLA-E, CD4, CD74, AP2M1, SRGAP2, CORO1…	C5	GO:CC	A membrane-bounded intracellular vesicle formed by invagination of the plasma membrane around an extracellular substance. Endocytic vesicles fuse with early endosomes to deliver the cargo for further sorting. [GOC:go_curators, PMID:19696797]
GSE3982_BCELL_VS_TH1_UP	4.9798e-05	0.00273857	0.557332	-0.334731	-1.81576	159	ZNF329, PHF1, PRKAB1, TAGLN, NCK2, LIN37, DPH5, ADAM28, TTC19, CEPT1, FBXO21, PDLIM4, PSD3, SPINK2, CNPY3, LAMC1, PLXNC1, STAT6, SLC35E1, PNOC, CD300A, MAP2K6, HCK, ZNF155, LTA4H, SCPEP1, IL27RA, TMUB2, HPS1, CSGALNACT1, CRIP1, GNB5, PLEKHF2, MFSD1, SYK, LYL1, SPINT2, ADPGK, ZNF385D, RNASET2	C7	IMMUNESIGDB	Genes up-regulated in comparison of B cells versus Th1 cells.
REACTOME_TCR_SIGNALING	4.98307e-05	0.00273857	0.557332	-0.390229	-1.95696	104	HLA-DQA1, HLA-DQB1, PSMD4, HLA-DRB5, PAK1, PSMA7, UBE2V1, PSMD13, HLA-DRB1, PSMD1, PIK3CB, UBE2N, PSMB3, HLA-DRA, FYB1, UBC, SKP1, PTPRC, CUL1, PLCG2, CD4, LCP2, PSMD8, PSMA1, PAG1, PSME3, PSMA6, PSMC4, PSMD12, CD3E, PTEN, PSMD3, PSMD2, PSMB7, PSMC6, BTRC, VASP, PSMB4, PSMC1, INPP5D	C2	CP:REACTOME	TCR signaling
NABA_MATRISOME_ASSOCIATED	5.02713e-05	0.00275693	0.557332	-0.247438	-1.53891	487	CCL28, MUC20, SLPI, CRLF1, CTSV, FRZB, SERPINF1, HYAL3, IGF2, TNFSF8, CLEC2A, ADAM28, WNT3, BMP3, ADAMTS2, ITIH2, CTSB, ADAMTS15, CLEC2L, ADAM22, ADAMTS1, PPBP, GDF10, SERPING1, CCL19, ANXA1, F13A1, ADAM23, WNT9A, F10, PLXNC1, CD209, HTRA3, ANXA11, GDF7, WNT6, C1QTNF1, CTSA, CSF3, IL10, PLAU, CTSK, BMP4, CLEC3B, SEMA3F, SEMA6C, SERPINA3, ADAMTSL1, LPA, FAM20A, S100A4, CST7, VEGFA, IL18, ANXA2, SU…	C2	CP	Ensemble of genes encoding ECM-associated proteins including ECM-affilaited proteins, ECM regulators and secreted factors
GOMF_PEPTIDASE_REGULATOR_ACTIVITY	5.05395e-05	0.00276578	0.557332	-0.351234	-1.87422	141	PRNP, SLPI, SERPINF1, APP, RPS27L, PCOLCE, ITIH2, COL6A3, SERPING1, SPINK2, SPINT1, FN1, TNFAIP8, PTTG1, GAS6, SERPINA3, LPA, WFDC3, PCOLCE2, CST7, VCP, ANXA2, SERPIND1, APLP2, FBLN1, CD27, NLRP1, SPINT2, LXN, C3, RARRES1, SNCA, TIMP3, RACK1, CARD16, CASP1, PSME3, TFPI, SERPINA5, APAF1, CSTB, NAIP, SERPINE2, CTSC, GAPDH, ITIH5, SERPINA1, RPS6KA1, CTSH, SIMC1, PROS1, COL4A3, CRIM1, UBE2Z, SERPINE1…	C5	GO:MF	Binds to and modulates the activity of a peptidase, any enzyme that catalyzes the hydrolysis peptide bonds. [GOC:dph, GOC:tb]
KEGG_OLFACTORY_TRANSDUCTION	5.08084e-05	0.00277463	0.557332	0.433725	1.97097	88	OR2L13, OR2L2, OR2L3, OR2AK2, OR2M4, OR2L8, OR2M3, OR2M2, OR2M5, OR6V1, OR6X1, PDE1C, OR2T4, CLCA4, CNGA4, OR13J1, OR2C1, OR2AG1, OR2T33, OR3A3, OR2D2, OR13C4, CALM2, OR2AG2, OR1L4, OR5C1, ADCY3, OR2H2, OR10A2	C2	CP:KEGG	Olfactory transduction
MODULE_223	5.17329e-05	0.00281917	0.557332	-0.379495	-1.937	113	SERPINF1, IGF2, HLA-DRB5, LILRB5, PPBP, NRP1, GRN, ISG20, TGFBI, DAB2, CSF3, HLA-DRA, BTG1, KCNN4, GAS6, MYC, CRIP1, IL18, HLA-B, KLF6, LRPAP1, CSF3R, HLA-A, HFE, CCN1, LY6E, CD4, ADRA1D, PDGFB, CD48, EDNRA, HLA-DMB, MTHFR, CD86, EMP3, EPS8, MDK, SFN, LILRB4, HLA-DOA, CXCL5, EMP2, CD83, LIF, RNASE6, LY86, FOSL1, CHRM3, TLR1, RUNX3, B2M, HLA-F, VIPR1, BST2, OSM, ZEB1, INSIG1, IL6, PTN, CREG1	C4	CM	Immune (defense) response.
GSE29618_MONOCYTE_VS_PDC_UP	5.25225e-05	0.00285463	0.557332	-0.318743	-1.77088	190	CYP1B1, MARCO, QPCT, ANXA1, RNF19B, CDC42EP3, EPB41L3, FGL2, SLA, FYB1, HCK, SCPEP1, S100A4, TNFAIP2, LST1, AIF1, TNFRSF1B, MYO1F, TBXAS1, SLC2A3, APLP2, SPI1, IER3, S100A11, NLRP1, PTPRC, IFNGR2, S100A10, TYROBP, CSF1R, IL1RN, BLVRB, LAT2, SOD2, AOAH, PKM, DPEP2, S100A12, CASP1, HMOX1, SDCBP, ARHGDIB, ZFP36L1, HK2, CLEC7A, GBP2, IFITM2, CD86, BLVRA, NAIP, ALOX5, GMFG, PTGS1, CHSY1, ENTPD1, CD14,…	C7	IMMUNESIGDB	Genes up-regulated in comparison of monocytes versus plasmacytoid dendritic cells (pDC).
GSE36476_CTRL_VS_TSST_ACT_16H_MEMORY_CD4_TCELL_OLD_DN	5.26042e-05	0.00285463	0.557332	-0.320922	-1.77565	185	BATF3, PEA15, EIF2B3, BYSL, GOT1, PSMD13, LGMN, TXN, PDCD11, RCN1, TUBB6, PMM2, IFI30, GTF2H4, KDELR2, GMPPB, TUBB, MRPL15, G3BP1, TUBA1C, GARS1, VCP, CYC1, TIMM8B, IER3, VDAC3, WDR3, SEH1L, SLC3A2, IARS1, BATF, TBC1D8, GART, LRRC42, PGAM1, CDK4, SLC39A14, DNAJB6, LRRK1, IL1R1, CD86, CTPS1, TPI1, NUP62, MYOF, SLC15A3, PSMG1, EIF6, POLR2H, KYNU, CLTC, PSMD2, TP53BP1, NOP16, MRPL17, TUBB2B, ZNF189,…	C7	IMMUNESIGDB	Genes down-regulated in comparison of untreated CD4 [GeneID=920] memory T cells from old donors versus those treated with TSST at 16 h.
GSE360_LOW_DOSE_B_MALAYI_VS_M_TUBERCULOSIS_DC_DN	5.2881e-05	0.00286365	0.557332	-0.327113	-1.80367	180	PAX8, CD47, MAD2L1BP, ALDH1A2, MARCO, TXN, RNF19B, PLXNC1, GNA15, CYB5A, MAP2K3, LTK, RER1, PDPN, TUBB, OASL, B3GNT2, C3AR1, H2BC12, ANXA2, GEM, NBN, SEC13, DUSP1, LCP1, CRHR2, ATP2A2, IER3, RFTN1, CD27, CUL1, CCL3, CCRL2, ADGRE1, LY6E, YKT6, BASP1, LCP2, PPP1R15A, UBE2L6, NRP2, ADAR, CD48, CASP5, GBP2, EIF4E2, CCT2, RND3, LDHA, ITGB3, DENND3, HSPA5, HSPA1A, SLC31A1, LHFPL2, PIM1, BCL2A1, KYNU, P…	C7	IMMUNESIGDB	Genes down-regulated in comparison of dendritic cells (DC) exposed to 5 worms/well B. malayi versus DC exposed to M. tuberculosis
GSE6269_HEALTHY_VS_FLU_INF_PBMC_DN	5.33475e-05	0.00288288	0.557332	-0.350141	-1.87209	145	R3HDM4, PHACTR2, SIGLEC1, CFB, FXYD6, SERPING1, RNF19B, GRN, FCGR1A, ABCC6, ALDOA, GNAI2, OASL, HPS1, RFX3, ACTB, GPSM3, SPI1, AVL9, ATP2A2, S100A11, STAB1, ARHGDIA, STXBP2, HLA-A, LGALS9, LY6E, CD74, PKM, IFITM1, PSME3, TRIM25, IFITM2, MACROH2A1, EMP3, CALR, GNAS, SZRD1, LSP1, IFITM3, NUCB1, ETV5, MARCKS, CTSD, IFI27, KDELR1, TGFB1, LGALS3BP, PLSCR1, DEDD, MS4A4A, TAGLN2, OS9, USP18, FLVCR2, GRB…	C7	IMMUNESIGDB	Genes down-regulated in comparison of peripheral blood mononuclear cells (PBMC) from healthy donors versus PBMC from patients with acute influenza infection.
MURARO_PANCREAS_ALPHA_CELL	5.40872e-05	0.00291676	0.557332	-0.247417	-1.5375	484	AHI1, STX16, VSTM2L, SSX2IP, LSAMP, MPC2, IRF6, FAM110B, SCG5, PCDHB4, CAPZB, PRKAR1A, PPP3CB, FXYD6, QPCT, INA, SLC38A10, TMEM14A, F10, CITED2, SLC29A1, PVR, RGS17, CDC42EP3, OSBPL6, UNC13A, TBC1D9, EPB41L3, CERS6, MRC1, MLLT11, OAZ1, PTPRT, NSG2, COPZ1, DEPP1, SNED1, DPP4, TMED3, BTG2, CERK, CLU, HPS1, CSGALNACT1, TMEM17, GDA, MAN1A1, SCAMP1, RGS9, MMRN1, CNIH2, HS6ST3, CEACAM19, GNE, RHBDD2, S…	C8
GAUTAM_EYE_IRIS_CILIARY_BODY_FIBROBLASTS	5.45615e-05	0.00293623	0.557332	-0.393156	-1.94773	96	GABRA2, PHACTR2, MFAP4, KLF2, IGFBP4, CEBPB, LPP, GLCE, WNT6, FN1, BTG2, NDUFA4L2, VEGFA, MAML2, MAN1A1, GEM, C1RL, FBLN1, JUN, LAMC3, WEE1, SOD2, SF1, PPP1R15A, FOSL2, SLC39A14, F2R, C1orf21, BCL3, CEMIP2, LSP1, CHEK2, ETS2, ACSL3, ID3, TUBB2B, NTRK3, ZFHX3, FOS, SH3BP5, STEAP4, YBX3, DNAH11, BMP1, PLIN2, SLC25A37, BZW1, CCDC71L, EGR1, CREB3L2, BHLHE40	C8		Occular cell types curated from Gautam and Hamashima et al. Multi-species single-cell transcriptomic analysis of ocular compartment regulons
KEGG_INTESTINAL_IMMUNE_NETWORK_FOR_IGA_PRODUCTION	5.48464e-05	0.00294543	0.557332	-0.555201	-2.2085	35	CCL28, HLA-DQA1, HLA-DQB1, MADCAM1, HLA-DRB5, HLA-DRB1, MAP3K14, IL10, HLA-DOB, HLA-DRA, LTBR, CCR9, CXCL12, HLA-DMB, CD86, HLA-DOA, TNFRSF17, CXCR4, TNFRSF13C, ITGA4, TGFB1	C2	CP:KEGG	Intestinal immune network for IgA production
AZARE_NEOPLASTIC_TRANSFORMATION_BY_STAT3_UP	5.5641e-05	0.00298192	0.557332	-0.373717	-1.88981	108	STX16, PRNP, IGF2, SCG5, CDV3, THBS1, AOX1, B4GALT1, JAG1, FN1, HMGCS1, NNMT, CSF3, PDPN, APOBEC3G, RAB6A, VNN1, CFH, MAN1A1, COPA, NUPR1, MAP1B, ARHGAP25, CALB1, YKT6, IFITM1, CHP1, LTBP1, PID1, PLK2, ARHGDIB, GPX3, CDH11, PTBP3, EMP3, SERPINE2, HRH1, PTGS2, CUX2, IFI27, SRGN	C2	CGP	Genes up-regulated in RWPE-1 cells (prostate cancer) upon expression of constitutively active form of STAT3 [GeneID=6774].
GOBP_ADAPTIVE_IMMUNE_RESPONSE_BASED_ON_SOMATIC_RECOMBINATION_OF_IMMUNE_RECEPTORS_BUILT_FROM_IMMUNOGLOBULIN_SUPERFAMILY_DOMAINS	5.62034e-05	0.00300583	0.557332	-0.296987	-1.69079	228	HLA-DQA1, HLA-DQB1, EXOSC6, NDFIP1, HLA-DRB5, FCGR2B, C1S, PPP3CB, HLA-DRB1, SERPING1, CCL19, ANXA1, MR1, FCGR1A, STAT6, PVR, JAG1, C1R, IL10, HLA-DOB, MTOR, C2, HLA-DRA, C7, IL27RA, IL12RB1, CLU, ENTPD7, MICA, TNFRSF1B, IL18, NBN, TRAF2, CYRIB, RNF8, C1RL, RFTN1, CD27, HLA-B, PTPRC, PTPN6, HLA-A, IL18R1, UNC13D, HFE, BATF, NFKBIZ, CADM1, HLA-E, MYO1G, CD4, C3, CD74, NCKAP1L, IL4I1, SMAD7, PRKCD,…	C5	GO:BP	An immune response mediated by lymphocytes expressing specific receptors for antigen produced through a somatic diversification process that includes somatic recombination of germline gene segments encoding immunoglobulin superfamily domains. Recombined receptors for antigen encoded by immunoglobulin superfamily domains include T cell receptors and immunoglobulins (antibodies) produced by B cells…
GOBP_ADAPTIVE_IMMUNE_RESPONSE	5.64152e-05	0.00301095	0.557332	-0.268969	-1.60487	333	ORAI1, HLA-DQA1, HLA-DQB1, PIK3CG, ARG2, EXOSC6, NDFIP1, HLA-DRB5, FCGR2B, C1S, PPP3CB, LILRB5, HLA-DRB1, SERPING1, CCL19, ANXA1, RNF19B, MR1, CD6, TNFRSF21, FCGR1A, ADCY7, CD209, STAT6, PVR, JAG1, C1R, IL10, HLA-DOB, MTOR, C2, HLA-DRA, C7, IL27RA, IL12RB1, CLU, ERAP2, ENTPD7, MICA, TNFRSF1B, IL18, NBN, TRAF2, CYRIB, SIPA1, RNF8, C1RL, RFTN1, CD27, SYK, HLA-B, PTPRC, PTPN6, HLA-A, IL18R1, UNC13D,…	C5	GO:BP	An immune response mediated by cells expressing specific receptors for antigen produced through a somatic diversification process, and allowing for an enhanced secondary response to subsequent exposures to the same antigen (immunological memory). [GO_REF:0000022, GOC:add, ISBN:0781735149]
GALINDO_IMMUNE_RESPONSE_TO_ENTEROTOXIN	5.71071e-05	0.0030416	0.557332	-0.430284	-2.03206	74	ITGA5, SOCS3, GLRX, CEBPB, PDLIM7, GADD45B, CSF3, UBC, TNFAIP2, VEGFA, DUSP1, CCL5, ACTG1, IER3, SRPRA, CCL3, IL1RN, IKBKE, PKM, HERPUD1, PTPRE, CSF2RB, BCL3, PTGS2, CCL4L2, CD14, PIM1, NOCT, LILRB4, GAPDH, JUNB, CD83, ETS2, RREB1, RAC2, GADD45A, FOSL1, PCDH7, SLC11A1	C2	CGP	Genes up-regulated in macrophages by aerolysin-related cytotoxic enterotoxin (Act) from Aeromonas hydrophila.
DESCARTES_FETAL_LUNG_MESOTHELIAL_CELLS	5.74546e-05	0.00305382	0.557332	-0.458127	-2.11263	66	ASS1, ALDH1A2, TBX18, MGP, CFB, CCN4, ELN, C1R, PTGIS, PCOLCE2, CFH, NMU, ABHD12B, GEM, SULF1, TGM1, COL8A2, MSLN, PODN, C3, PRELP, GLP2R, WNT2B, SBSPON, SMTNL2, PLAC9, PCK1, ADAMTS5, GSDME, LIF, CRIM1	C8		descartes DE_gene_by_organ.csv, fold.change>5, qval<0.05, pval<0.05
GSE37532_TREG_VS_TCONV_PPARG_KO_CD4_TCELL_FROM_VISCERAL_ADIPOSE_TISSUE_UP	5.81105e-05	0.00307843	0.557332	-0.317523	-1.75731	186	CISD1, GNPTG, CTSV, SLC16A5, SNRNP40, EIF4EBP1, MED31, TSPAN4, BAHD1, RPS27L, PLAGL1, HM13, PFN1, CITED2, GADD45B, PPP1R14C, MATK, PTRH1, SND1, IPO9, GRPEL2, TMEM121, SYTL3, LMO4, UTP4, CRIP1, MYO1F, CD68, CD27, FAS, STX11, NAA20, BATF, SELENOH, CDKN1A, SLC25A4, IRF8, MRTO4, HMGCR, BCL3, PSMA6, LRRC59, GALNT2, IL1R1, CTPS1, NME2, AHCY, C15orf39, TIMM23, UQCC1, SMCO4, C12orf75, ASNS, SPEF1, SHE, P…	C7	IMMUNESIGDB	Genes up-regulated in visceral adipose tissue from aged PPARG [GeneID=5468] knockout mice: T reg versus T conv.
MILI_PSEUDOPODIA_HAPTOTAXIS_DN	5.81553e-05	0.00307843	0.557332	-0.229937	-1.46703	639	NSMCE3, CD47, ORAI1, TM2D3, SLC39A10, CTSV, LTBP2, FGFR1, SLC38A1, ITGA5, SLC19A1, ATP10D, CD151, COL1A2, GJC1, UBE4A, TSPAN4, ANKLE2, TTC19, FZD2, PCOLCE, MFHAS1, IGFBP6, THBS1, CNPY3, GRN, GANAB, PDCD11, B4GALT1, SLC9A5, SLC38A10, VCL, PIGS, TNFRSF21, UXS1, B4GALT5, SHISA5, SLC29A1, TMEM43, GLG1, MIA3, SSH1, LHFPL6, RER1, GNS, KDELR2, POLR3A, EFNA1, TMEM109, KCNN4, COLGALT1, LAMB1, RNF121, CPD,…	C2	CGP	Transcripts depleted from pseudopodia of NIH/3T3 cells (fibroblast) in response to haptotactic migratory stimulus by fibronectin, FN1 [GeneID=2335].
THUM_SYSTOLIC_HEART_FAILURE_UP	6.02328e-05	0.00318189	0.557332	-0.264092	-1.59842	380	PRNP, HLA-DQB1, FMOD, PIK3CG, SSBP4, LTBP2, MFAP4, GNLY, ITGBL1, FCGR2B, CTSB, C1S, AKR1C1, HSP90AB1, CDV3, CFB, PKP2, HLA-DRB1, THBS1, MR1, VAMP8, F13A1, CDC5L, PDLIM7, CDC42EP3, GADD45B, TMEM43, MS4A6A, IGFBP3, LEPR, MRC1, H3C6, DEPP1, DKK3, HLA-DRA, OASL, B3GNT2, C3AR1, LST1, VEGFA, AIF1, LAPTM5, ACTB, MAN1A1, YWHAZ, M6PR, PLEKHF2, CTHRC1, LCP1, DOCK2, ARL8B, ACTG1, ACTR2, PTPRC, CCL4, CD53, A…	C2	CGP	Genes up-regulated in samples with systolic heart failure compared to normal hearts.
GSE10325_CD4_TCELL_VS_MYELOID_DN	6.06195e-05	0.0031958	0.557332	-0.325708	-1.79593	180	PEA15, HLA-DQB1, SERPINF1, CYP1B1, ATP10D, FAM110B, TSPAN4, SLC17A9, CHST15, HLA-DRB1, CEBPB, PLXNC1, TUBB6, PLEK, SPINT1, TBC1D9, AQP9, MAP2K3, IFI30, FGL2, HCK, TLR6, LTA4H, SCPEP1, VNN1, RHBDF2, APLP2, GFOD1, RPH3A, ACTG1, SYK, KCNMB1, ITGAM, IFNGR2, LYL1, FCGR2A, NAGK, CSF1R, PLCG2, LAT2, RNPEP, BASP1, CCR1, CDKN1A, HEXB, PRKCD, IRF8, HLA-DMB, CSF2RB, CLEC7A, CD86, CTBP2, SLC16A3, ALOX5, SH3B…	C7	IMMUNESIGDB	Genes down-regulated in comparison of healthy CD4 [GeneID=920] T cells versus healthy myeloid cells.
MODULE_241	6.17368e-05	0.00324798	0.538434	-0.449794	-2.06126	64	COL1A2, MYL9, FZD2, PPIB, LGMN, SECTM1, GNA15, FN1, NNMT, NINJ1, C3AR1, TBXAS1, SPI1, IER3, SAA1, SOD2, AOAH, CCR1, PLOD1, POMZP3, POSTN, P2RX4, MT1H, CDH11, ATP1B1, CD14, IFI27, TRIP10, MGAT1, LGALS3BP, PRRX1, MAN2B1, TLR1	C4	CM	Genes in the cancer module 241.
GSE22886_CD8_TCELL_VS_BCELL_NAIVE_UP	6.18603e-05	0.00324798	0.538434	-0.325187	-1.79603	183	R3HDM1, GNLY, NDFIP1, NELL2, CIAPIN1, JPT1, CEP68, FAM8A1, COL6A2, SVIL, ANXA1, MCAT, ATP2B4, CITED2, MATK, PSMD1, CTSA, ARRB2, IL32, TMED3, FYB1, BAG3, NIBAN1, UAP1, RUNX1, IL27RA, CERK, CST7, RGS10, SACS, GBP1, CCL5, TIMM8B, ACTG1, CD27, TACC3, LRFN3, ITGAL, CABIN1, DENND2D, SAMSN1, MOGS, APBB1IP, XBP1, RSL1D1, GBP2, PLEKHB2, ECPAS, MTX1, LEPROTL1, B4GALT3, IL17RA, ENO2, IFITM3, HMG20B, LGALS1,…	C7	IMMUNESIGDB	Genes up-regulated in comparison of naive CD8 T cells versus naive B cells.
MARTINELLI_IMMATURE_NEUTROPHIL_DN	6.25861e-05	0.00327943	0.538434	-0.771198	-2.25704	12	FCGR2A, CSF3R, SOD2, AOAH, SEMA3C, ALPL, NCF2, ST6GALNAC2, CXCR1, CXCR2, CXCL8, FCGR3B	C2	CGP	Neutrophil-specific genes down-regulated in comparison of immature with mature neutrophils.
GOBP_SENSORY_PERCEPTION_OF_CHEMICAL_STIMULUS	6.29182e-05	0.00329018	0.538434	0.381166	1.85788	133	OR2L13, OR2L2, OR2L5, OR2L3, OR2AK2, OR2M4, OR2L8, OR2M3, OR2M2, OR2M5, OR6V1, OR6X1, TAS2R7, OR2B8P, OR2T4, SLC24A4, CNGA4, OR13J1, OR2C1, AZGP1, OR2AG1, OR2T33, ASIC3, C5AR1, OR3A3, OR2D2, OR13C4, TAS2R20, NCAM2, TAS2R39, OR2AG2, OR1L4, OR5C1, ADCY3, TAS2R50, OR2H2, OR10A2, TRPV1, TAS2R14, OR9A2, OR10A5, RTP5, OR10A4, TAS2R30, NXNL2, OR2D3, TAS2R19, TAS2R40, OR2T8, TAS2R46, DRD2, OR2K2	C5	GO:BP	The series of events required for an organism to receive a sensory chemical stimulus, convert it to a molecular signal, and recognize and characterize the signal. This is a neurological process. [GOC:ai]
MCBRYAN_PUBERTAL_TGFB1_TARGETS_UP	6.37906e-05	0.00332907	0.538434	-0.331735	-1.79951	159	ACTG2, TAGLN, COL8A1, ACTA2, JPT1, TPM2, PCOLCE, KDR, JAG1, FN1, CLIC1, DKK3, ECM1, KRT18, LASP1, DLAT, CPD, RUNX1, CLU, VEGFA, CYC1, APLP2, HK1, HSPG2, IER3, MMP2, WEE1, CCN1, BASP1, SNTB2, CDKN1A, F2R, CDC42EP5, WNT5A, SPIN1, CEMIP2, IER5, GALNT2, COTL1, CDH11, LPL, GUSB, TGM2, LIPG, MAPK14, CD14, HES1, ETS2, CRIM1, ST14, SFPQ, ATP1A1, CAP1, MMP14, EXTL3, RAB17, CYB561, GSN, S100A6, FABP3, RAB5…	C2	CGP	Pubertal genes up-regulated by TGFB1 [GeneID=7040].
JECHLINGER_EPITHELIAL_TO_MESENCHYMAL_TRANSITION_UP	6.40745e-05	0.00333215	0.538434	-0.448567	-2.03934	62	SLPI, CYP1B1, GAS1, COL6A2, PCOLCE, COL3A1, DCN, PROCR, DAB2, LAMB1, CFH, CD68, MMP2, RNASET2, SLC3A2, RRAS, BCL3, PDGFRB, PTGS1, TNXB, IFITM3, ASNS, SDC2, INHBA, CTSZ, B2M, STAT1, PLA2G7, IRF7, SPARC, CXCL2, S100A8, PTPN22, VIM, TNC	C2	CGP	Genes up-regulated during epithelial to mesenchymal transition (EMT) induced by TGFB1 [GeneID=7040] in the EpH4 cells (mammary epithelium cell line transformed by HRAS [GeneID=3265]).
GSE24574_BCL6_HIGH_TFH_VS_NAIVE_CD4_TCELL_DN	6.41069e-05	0.00333215	0.538434	-0.327064	-1.80735	184	TRAPPC2B, RAB22A, PRNP, PEA15, CAND1, ANKLE2, HOPX, GPX1, SUCLA2, PGD, MATK, PSMD1, MAP2K3, CLIC1, DUSP14, HNRNPF, UAP1, RGS10, SLC26A2, SACS, MBNL1, LRRFIP1, GEM, ZNF165, ACTG1, IER3, CCT5, VDAC3, ATP6V1A, ZNRD2, LPCAT1, SLC5A3, ATP2B1, FAM98A, RRAS2, PGAM1, GAD1, ARF1, CSTB, EMP3, SERPINE2, NSMAF, HNRNPA0, CHSY1, ATP1B3, ENO2, BAIAP2, BCL2A1, PAQR3, MYDGF, SPRY1, COPS8, EIF4A3, SRGN, TP53BP1, C…	C7	IMMUNESIGDB	Genes down-regulated in BCL6 [GeneID=604] high follicular helper T cells versus naïve T CD4 [GeneID=920] cells.
GSE18281_SUBCAPSULAR_VS_CENTRAL_CORTICAL_REGION_OF_THYMUS_DN	6.44622e-05	0.0033439	0.538434	-0.32728	-1.80481	179	TAPBPL, TMEM183A, ITGA5, SOCS3, BYSL, ASS1, TIMM10, TNFRSF21, TUBB6, PROCR, HCK, MYC, OASL, CCT6A, MARCHF5, DDX24, MEFV, CCL5, F11R, UBA7, HK1, APOD, KLF6, USB1, CCRL2, NAA20, RGS1, LAPTM4B, AOAH, CASP4, BATF, NFKBIZ, SAMSN1, SUSD6, CDKN1A, UBE2F, RRP12, PRKCD, UBE2L6, CD86, CSTB, FCER1G, LIPG, UBE2D3, CTSC, FGR, RAB20, TINAGL1, GNB4, TMEM106A, MRPL17, LGALS3BP, JAK3, FOS, EIF2S2, SLAMF8, WARS1, …	C7	IMMUNESIGDB	Genes down-regulated in thymus cortical regions: subcapsular versus central cortical.
CHIANG_LIVER_CANCER_SUBCLASS_CTNNB1_DN	6.56612e-05	0.00339451	0.538434	-0.34689	-1.85104	141	SLPI, COL1A1, RDH12, STAT4, LSR, SPHK1, COL1A2, SOCS3, SLC17A9, GOT1, MYL9, RAB27B, COL3A1, COL6A3, TBX15, ADAMTS1, CCL19, ISLR, TNFAIP8, CD24, C7, GPR88, VNN1, GDA, GEM, SULF1, CTHRC1, C11orf96, SLC7A2, LUM, ACP5, CXCL12, RGS1, LXN, BASP1, VNN2, MAL2, S100P, PAG1, MMD, GLT1D1, SEL1L3, KCTD12, SERPINE2, CCDC80, GCH1, PTGDS, GPR183, MCUB, ETS2, DUSP5, CMTM3, AEBP1, RCAN2, SERPINE1, CYFIP2, IL7R, L…	C2	CGP	Top 200 marker genes down-regulated in the 'CTNNB1' subclass of hepatocellular carcinoma (HCC); characterized by activated CTNNB1 [GeneID=1499].
GERHOLD_ADIPOGENESIS_DN	6.57001e-05	0.00339451	0.538434	-0.460436	-2.05877	58	GAS1, EIF3CL, THBS1, BID, FN1, TUBB, ECM1, GAS6, SOX4, TNFAIP2, CEBPD, ANXA2, IER3, CCT5, THBD, PDCD2, CXCL12, CCN1, CCN2, CDK4, IL1R1, CCT2, PDGFRB, BAX, AKR1B1, UCP2	C2	CGP	Selected genes down-regulated during differentiation of 3T3-L1 cells (fibroblast) into adipocytes in response to adipogenic hormones.
GSE24574_BCL6_HIGH_VS_LOW_TFH_CD4_TCELL_DN	6.65155e-05	0.00342979	0.538434	-0.322616	-1.77615	178	PEA15, METTL13, KIF2C, HSP90AB1, CDK1, IGFBP4, EIF3I, EIF4A1, SLC29A1, SUCLA2, PGD, PSMD1, MAP2K3, IGFBP2, TPX2, LTA4H, CCT6A, CST7, VCP, ANXA2, GBP1, BCAT2, TOMM40, ACTG1, S100A11, MRPS27, AP2S1, VDAC3, STXBP2, MYO1B, PCK2, CDC6, IL1RN, IL18R1, GSTA4, PKM, LCP2, SRGAP2, TMPO, PDIA6, MCM4, PCBD1, PSMA6, CSTB, CCNB1, SERPINE2, LDHA, TMEM106C, HNRNPA0, ATP1B3, ENO1, BCL2A1, LGALS1, TRIP10, SNRPA, A…	C7	IMMUNESIGDB	Genes down-regulated in follicular helper T cells: BCL6 [GeneID=604] high versus BCL6 [GeneID=604] low.
GOBP_MATERNAL_PROCESS_INVOLVED_IN_FEMALE_PREGNANCY	6.68578e-05	0.00344059	0.538434	-0.500365	-2.10295	44	CTSB, CITED2, ADCY7, DAZAP1, KPNA6, CNR1, GJB2, NR2F2, MEN1, LGALS9, ITGA3, EPOR, PTGS2, STOX2, HAVCR2, PAM, JUNB, LIF, TMED2, DEDD, RGS2, WNT4	C5	GO:BP	A reproductive process occurring in the mother that allows an embryo or fetus to develop within it. [GOC:dph]
HALLMARK_COAGULATION	6.73732e-05	0.00345501	0.538434	-0.378371	-1.89271	101	APOC2, CTSV, CTSB, C1S, PREP, CFB, LGMN, SERPING1, THBS1, ANXA1, F10, PLEK, FN1, C1R, DUSP14, PLAU, CTSK, DPP4, C2, LTA4H, CFD, CLU, CFH, GDA, PRSS23, THBD, MMP2, C3, TIMP3, F2RL2, PDGFB, CAPN5, ARF4, C1QA, ITGB3, PECAM1, SERPINA1, CTSH, PROS1, SERPINE1, RABIF, PEF1, MMP14, CFI, A2M, DUSP6, WDR1, GSN, ADAM9, SPARC, FBN1	H		Genes encoding components of blood coagulation system; also up-regulated in platelets.
MURARO_PANCREAS_ENDOTHELIAL_CELL	6.74052e-05	0.00345501	0.538434	-0.265121	-1.58847	348	PLVAP, PEA15, MADCAM1, CYP1B1, ITGA5, SOCS3, ABI3, CYP1A1, OLFML2A, APP, KDR, TP53I11, GPX1, IGFBP4, NRP1, THBS1, UXS1, LAMC1, TUBB6, RCC2, HTRA3, JAG1, DAB2, SELE, LHFPL6, COL15A1, FAM43A, ARPC2, DKK3, EFNA1, RBMS1, LAMB1, SOX4, AFAP1L1, EFNB3, COL4A2, COL4A1, TMSB10, FHOD1, ITPRIPL2, SLC26A2, RASA4, LRRC8C, SLC2A3, PRSS23, HK1, HLA-B, STING1, THBD, MMP2, COL13A1, MCAM, MYL12B, CXCL12, MMRN2, LX…	C8
WP_MICROGLIA_PATHOGEN_PHAGOCYTOSIS_PATHWAY	6.76606e-05	0.00346126	0.538434	-0.535252	-2.19024	39	PIK3CG, FCGR1A, PIK3CB, VAV1, HCK, NCF1, ARPC1B, SYK, ITGAM, PTPN6, TYROBP, PLCG2, NCKAP1L, RAC3, FCER1G, C1QA, C1QC, LYN, C1QB, NCF2, RAC2, TREM2, PIK3R3	C2	CP:WIKIPATHWAYS	Microglia pathogen phagocytosis pathway
LENAOUR_DENDRITIC_CELL_MATURATION_UP	6.8126e-05	0.00347819	0.538434	-0.378047	-1.89109	101	HLA-DQA1, HLA-DQB1, CRABP2, PDLIM4, F13A1, CITED2, CYB5A, MRC1, NR4A3, DPP4, ECM1, SLA, GAS6, SOX4, TLE5, DUSP1, FCGR2A, ST6GAL1, SPINT2, SULT1C2, IARS1, RARRES1, CD74, MMD, PCBD1, CD86, ARF4, LPL, ATP1B1, TGM2, CTSC, SEMA3C, C1QB, RRP1B, INHBA, CD83, DUSP5, RNASE6, LGALS3BP, CD59, PTPRO, KCNAB2, A2M, GDF15, FABP4, PEBP1, CCND2, FABP3, ACOT7, PRKACB	C2	CGP	Genes up-regulated during in vitro maturation of CD14+ [GeneID=929] monocytes (day 0) into immature (day 7) and mature dendritic cells (day 14).
MIR214_5P	6.86351e-05	0.00349728	0.538434	-0.495324	-2.10519	46	ARHGAP28, NELL2, UNC5A, NXF1, SRP72, PREP, PSD3, F10, JAG1, ZFP3, ELAVL4, SOX4, EGFLAM, KLF5, NCKAP1L, UBE2K	C3	MIR:MIRDB	Genes predicted to be targets of miRBase v22 microRNA hsa-miR-214-5p in miRDB v6.0 with MirTarget v4 prediction scores > 80 (high confidence targets).
DESERT_STEM_CELL_HEPATOCELLULAR_CARCINOMA_SUBCLASS_UP	7.2127e-05	0.00366799	0.538434	-0.299376	-1.69747	219	BICC1, COL1A1, COCH, ITGA5, SPHK1, COL1A2, JPT1, EPCAM, TPM2, KIF2C, CDK1, SLC12A8, TNFRSF21, LAMC1, ATIC, DAB2, CLIC1, PTTG1, OLFML3, KDELR3, IGF2BP2, ARPC2, TMED3, MAPK13, LAMB1, ALDOA, SOX4, TPX2, TUBA1C, COL4A1, BLMH, MMS19, YWHAZ, PLEKHF2, SULF1, RPS3, S100A11, BZW2, TACC3, IFNGR2, UCHL1, LPCAT1, IARS1, LAPTM4B, EIF3D, XPNPEP1, PKM, VNN2, TPD52L2, POSTN, P2RX4, MMD, CDK4, HK2, DSG2, CCT2, RN…	C2	CGP	Genes up-regulated in the stem cell-type subclass of hepatocellular carcinomas. Sets created as part of a metaanalysis of nine public transcriptomic datasets merged into a metadataset including 1133 human hepatocellular carcinomas obtained after curative resection. For platform descriptions of each one of the 9 datasets, see Figure 1B in Désert et al., Hepatology (2017), 66: 1502-1518.
MODULE_174	7.28714e-05	0.00369527	0.538434	-0.410613	-1.96551	80	COL1A2, MYL9, FZD2, PPIB, LGMN, SECTM1, GNA15, FN1, NNMT, NINJ1, C3AR1, TBXAS1, SPI1, CD68, IER3, FOLR2, CSF3R, SAA1, SOD2, AOAH, CCR1, ELAVL1, PLOD1, POMZP3, POSTN, P2RX4, MT1H, CDH11, ATP1B1, CD14, IFI27, TRIP10, MGAT1, LGALS3BP, PRRX1, MAN2B1, TLR1, ENG, GRK5, GDF15, PLD3	C4	CM	Genes in the cancer module 174.
GSE40274_CTRL_VS_FOXP3_AND_LEF1_TRANSDUCED_ACTIVATED_CD4_TCELL_UP	7.29489e-05	0.00369527	0.538434	-0.343788	-1.8303	140	IFT140, LMO7, MFHAS1, CITED2, TGFB1I1, TNFAIP8, CACNB4, DUSP14, IL10, FGL2, LMO4, FAM174B, C3AR1, TMSB10, VEGFA, CEBPD, GNB5, DAPL1, CCL5, CD27, CYP2S1, ITGAM, ARL4D, CSF3R, CES1, STX11, NFKBIZ, TNFRSF19, SLC5A3, TBC1D30, AGTRAP, GAD1, HK2, LPAR2, ALOX5, LIPG, GOLGA8A, MAP3K8, MARVELD1, GPR132, AACS, PIM1, TNFRSF17, ATP8A2, FEM1B, APOLD1, KLHL21, CRIM1, HEYL, IER2, LEF1, MREG, ITGB1BP1, CXCR2, MV…	C7	IMMUNESIGDB	Genes up-regulated in CD4 T conv: control versus over-expression of LEF1 and FOXP3 [GeneID=51176;50943].
BURTON_ADIPOGENESIS_8	7.40663e-05	0.00374149	0.538434	-0.435806	-2.02452	68	SERPINF1, OGN, ACTA2, FAM91A1, APP, PHLDB2, B9D1, VCL, PDLIM7, CTSA, KDELR3, TES, PDPN, PTGIS, SCPEP1, TMSB10, PRSS23, LOX, GNG10, SKI, KCTD10, TWIST2, F2R, HMGCR, EMP3, BAX, TPBG, SERTAD1, CD276, CMTM3, CAP1, MYH9, VCAM1, ASAH1, PLA2G7, PLD3, DSTN	C2	CGP	Progressively down-regulated 8-96 h during differentiation of 3T3-L1 cells (fibroblast) into adipocytes.
MEISSNER_BRAIN_HCP_WITH_H3K4ME3_AND_H3K27ME3	7.41504e-05	0.00374149	0.538434	-0.207256	-1.36528	971	PRLHR, NAPRT, BATF3, LHFPL5, SEC31B, HAPLN4, VSTM2L, ARHGAP28, SLC32A1, ARG2, COCH, PLEKHA2, FRZB, CMTM8, EIF4EBP1, ITGA5, N4BP3, P2RX5, GJC1, SLC16A12, CEMIP, GAS1, TC2N, KLF2, EMX1, ASS1, ALDH1A2, HTR7, BMP3, ADAMTS2, PHLDB2, FZD2, TBX18, TRIM58, CPXM1, CFAP299, SVIL, DLX5, KDR, ADAMTS15, FOXC1, GIPC3, COL18A1, FBLN2, TP53I11, NTN4, CDK1, TBX15, PKP2, IGFBP4, INA, ANO1, LAMC2, AGPAT2, NTN1, WNT…	C2	CGP	Genes with high-CpG-density promoters (HCP) bearing histone H3 dimethylation at K4 (H3K4me2) and trimethylation at K27 (H3K27me3) in brain.
GSE17301_ACD3_ACD28_VS_ACD3_ACD28_AND_IFNA5_STIM_CD8_TCELL_DN	7.43411e-05	0.00374381	0.538434	-0.32026	-1.77699	188	AHI1, PEA15, LILRA4, STAT4, MFAP4, SERPINF1, TPM2, TMEM268, TSPAN13, CTSB, GPX1, HLA-DRB1, SERPING1, GRN, B4GALT1, TGFBI, IQGAP2, MS4A6A, DPP4, HLA-DRA, CD300A, BLNK, CD302, SCYL2, GUCY1A1, MYO5A, MNDA, TYROBP, NPC2, GLIPR1, CASP4, DHRS7, CD74, FLOT1, PPP1R15A, HERPUD1, FAM98A, PRKCD, IRF8, HLA-DMB, LY6H, CSF2RB, RUBCN, HK2, SEL1L3, KCTD12, DHCR7, FCER1G, PTBP3, FNDC3A, ALOX5AP, CTSC, RUBCNL, PTG…	C7	IMMUNESIGDB	Genes down-regulated in CD8 T cells activated by anti-CD3 and anti-CD28 versus those stimulated by IFNA5 [GeneID=3442].
GSE29618_BCELL_VS_MONOCYTE_DN	7.5656e-05	0.00380263	0.538434	-0.31003	-1.72945	194	PEA15, NDFIP1, PAK1, GLRX, CTSB, SVIL, QPCT, VAMP8, PLEK, CDC42EP3, EPB41L3, CTSA, IFI30, OAZ1, GNS, ARPC2, FYB1, CD300A, LTA4H, VEGFA, CEBPD, ATP6V1B2, MYO1F, TBXAS1, CD68, S100A11, RAP2B, STXBP2, ATP6V1A, CSF3R, BLVRB, SOD2, AOAH, ADA2, MYL6, PKM, TPD52L2, ACTN1, CHP1, CCR1, CASP1, HMOX1, SDCBP, PID1, COTL1, TPI1, BLVRA, NAIP, MACROH2A1, PTTG1IP, GMFG, PTX3, IL17RA, PTGS2, ENO1, CD14, ZDHHC7, P…	C7	IMMUNESIGDB	Genes down-regulated in comparison of B cells versus monocytes.
GSE43955_1H_VS_10H_ACT_CD4_TCELL_WITH_TGFB_IL6_DN	7.62521e-05	0.00382517	0.538434	-0.321084	-1.76378	175	AHI1, CD47, APOC2, TMEM183A, LTBP2, CMTM8, COL1A2, GLRX, CRABP2, PSMA7, TSPAN13, COL18A1, PRKAR1A, FBLN2, SULT4A1, ANXA1, DCN, DPM1, TUBB6, MYO1C, FN1, IGFBP2, NNMT, FRRS1, IGF2BP2, IL10, FGL2, ELAVL4, DKK3, TARS2, COL4A2, AIF1, CCR5, GPN1, S100A11, NADK, FRMD6, FOLR2, CSF3R, SOD2, LY6E, HLA-E, TIMP3, VNN2, CCN2, PDGFB, IL1RL1, DBNL	C7	IMMUNESIGDB	Genes down-regulated in CD4 [GeneID=920] T helper cells Th17 treated with TGFB1 and IL6 [GeneID=7040;3569]: 1h versus 10h.
REACTOME_INTERLEUKIN_4_AND_INTERLEUKIN_13_SIGNALING	7.68423e-05	0.00384461	0.538434	-0.417213	-2.00451	82	COL1A2, SOCS3, POMC, ANXA1, F13A1, OPRM1, STAT6, FN1, IL10, MYC, VEGFA, CEBPD, TNFRSF1B, IL18, ITGAM, MMP2, SAA1, BATF, CDKN1A, HMOX1, JAK1, ALOX5, PTGS2, PIM1, TWIST1, JUNB, LAMA5, LIF, TGFB1, ITGAX, JAK3, FOS, VCAM1, HSP90B1, STAT1, NOS2, CXCL8, HSPA8, STAT3, FOXO3, OSM, ZEB1, VIM, IL6	C2	CP:REACTOME	Interleukin-4 and Interleukin-13 signaling
REACTOME_SIRT1_NEGATIVELY_REGULATES_RRNA_EXPRESSION	7.69368e-05	0.00384461	0.538434	0.480527	2.03438	60	H2AC4, H3C3, H2BC3, H4C2, H2BC9, H2BC7, H3C7, H3C2, H2AX, H2BC17, H2AC14, H4C13, H3C8, TBP, H3C11, H4C14, RRP8	C2	CP:REACTOME	SIRT1 negatively regulates rRNA expression
TAKEDA_TARGETS_OF_NUP98_HOXA9_FUSION_10D_DN	8.06812e-05	0.00402396	0.538434	-0.362763	-1.85447	114	SLPI, SERPINF1, KLF2, CTSB, PPBP, CHIT1, LGMN, NRP1, F13A1, TGFBI, DAB2, CD24, MAPK13, BLNK, CST7, RAPH1, STAB1, CCL4, CCL3, ACP5, RARRES1, PID1, NRP2, S100P, TMTC1, PADI4, LGALSL, IL1R1, ME1, MAF, C1QA, TMEM45B, C1QC, ADGRG3, OLFML2B, LHFPL2, C1QB, CXCL5, GSDME, SLC7A8, TREM2, ID3, ST14, IL7R, MREG, CD59, SLAMF8, PLA2G7, A2M, FUCA1, GGTA1, SLC38A6, FABP3, VSTM1, CXCL2, FRMD4A	C2	CGP	Genes down-regulated in CD34+ [GeneID=947] hematopoetic cells by expression of NUP98-HOXA9 fusion [GeneID=4928;3205] off a retroviral vector at 10 days after transduction.
GSE43260_BTLA_POS_VS_NEG_INTRATUMORAL_CD8_TCELL_UP	8.20387e-05	0.00408379	0.538434	-0.315132	-1.75081	190	PHF1, ITGA5, PPIB, CAPZB, OSBP, GRN, TRAPPC3, TIMM17A, MOAP1, KDELR2, ALDOA, STK10, STX5, UAP1, S100A4, VCP, CD302, ANXA2, SEC13, JUN, UFD1, PDIA4, VDAC3, CES1, BLVRB, AOAH, IL16, SEC24D, RAN, PDIA6, PSMD8, RRP12, ETF1, HMOX1, LRRC42, S100P, HLA-DMB, TMED5, ZNF516, TFPI, RPN1, NQO1, FNDC3A, GMFG, NOTCH3, HSPA5, ALOX5AP, NSMAF, LHFPL2, CAPNS1, NUCB1, LILRB4, TSPO, MYDGF, POR, P4HB, CTSD, RBM42, RR…	C7	IMMUNESIGDB	Genes up-regulated in tumor-infiltrating CD8 T cells: BTLA+ [GeneID=151888] versus BTLA- [GeneID=151888].
GOCC_GLUTAMATERGIC_SYNAPSE	8.21981e-05	0.00408387	0.538434	-0.276328	-1.62772	293	APBA1, STX1A, DLG4, KPNA2, SORCS3, PRKAR1A, PPP3CB, FXYD6, HPCA, NRP1, PFN1, ATP2B4, ADAM23, ERBB4, FLOT2, NPTX1, CNR1, ARPC2, ELAVL4, SEMA3F, HTR2A, GRIA1, EFNB3, VCP, ACTB, YWHAZ, RGS9, PPP3CA, CNIH2, GUCY1A1, PCDH8, SNAP25, ACTC1, LRFN3, SV2A, CALB1, SHANK1, NAPB, AP2M1, FLOT1, ACTN1, CAMKV, ATP2B1, P2RX6, CORO1A, ELAVL1, PPM1H, AP2B1, MAL2, SLC6A17, ADGRA1, RGS14, NRP2, VPS35, RAB11A, CADPS, …	C5	GO:CC	A synapse that uses glutamate as a neurotransmitter. [GOC:dos]
GSE29618_BCELL_VS_PDC_DAY7_FLU_VACCINE_DN	8.28038e-05	0.00410155	0.538434	-0.321212	-1.77218	182	AHI1, LILRA4, PIK3CG, SERPINF1, TPM2, APP, GPX1, TXN, NRP1, GRN, ATP2B4, TGFBI, TNFRSF21, GNA15, IQGAP2, PGD, JAG1, DAB2, CERS6, DPP4, TMED3, TMEM109, GAS6, MAP2K6, SOX4, CD302, SEC61A2, MAN1A1, GUCY1A1, CD68, TYROBP, IL18R1, MGAT4A, CD4, DHRS7, FLT3, MYL12A, PTMS, HEXB, PTPRE, IRF8, CSF2RB, SLC20A1, FCER1G, FCGRT, AHCY, PTBP3, MACROH2A1, ALOX5AP, LHFPL2, CTSC, PTGDS, SEMA3C, CAPRIN1, RAB15, LILR…	C7	IMMUNESIGDB	Genes down-regulated in comparison of B cells from influenza vaccinee at day 7 post-vaccination versus plasmacytoid dendritic cells (pDC) at day 7 post-vaccination.
SABATES_COLORECTAL_ADENOMA_DN	8.28707e-05	0.00410155	0.538434	-0.307618	-1.74072	213	MFAP4, OGN, COL14A1, ABI3BP, MYH11, SIGLEC1, ADH1B, BMP3, OSR1, SCARA5, LYVE1, AOC3, CCL19, SPINK2, ZNF483, F13A1, SECTM1, GCNT2, VIP, TBC1D9, EPB41L3, FN1, TPH1, ARHGAP15, SV2B, CLEC3B, C7, MAMDC2, RBM24, CLU, CFH, SLC26A2, NCF1, DUSP1, CCL5, FBLN1, TUSC3, GHR, TRAF3IP3, CXCL12, SYNPO2, RSPO3, GREM2, CD37, SCGN, BEND5, CD48, CHODL, PAG1, RAB3B, PTPRR, WNT2B, GPX3, MEOX2, THRB, KCTD12, CHRNA1, CC…	C2	CGP	Genes down-regulated in colorectal adenoma compared to normal mucosa samples.
GSE339_CD8POS_VS_CD4CD8DN_DC_IN_CULTURE_UP	8.41674e-05	0.00415777	0.538434	-0.317535	-1.7584	187	COG5, LSR, CRABP2, PPIB, RAB8B, MAN1B1, TXN, RNF19B, GRN, CD6, BID, ERBB4, TGFBI, TUBB6, CCN3, INO80E, PLD4, BMP4, PTGIS, PI4K2A, CKS1B, RGS10, ARL1, TNFRSF1A, FBXW2, SEZ6, KIF3C, SEC61G, MAP1B, IFNGR2, NABP1, GFUS, FGF5, NPC2, LAPTM4B, SOD2, KCTD10, CADM1, CMTM7, NCKAP1L, MOGS, EDEM2, SEMA4F, TENT5C, MAP4K1, HLA-DMB, RAB11A, GPX3, PLEKHB2, MACROH2A1, FNDC3A, SH3BP2, HPCAL1, TCIRG1, EIF6, CAPNS1,…	C7	IMMUNESIGDB	Genes up-regulated in comparison of CD8 dendritic cells (DC) versus CD4- [GeneID=920] CD8- DCs.
CUI_DEVELOPING_HEART_TRABECULAR_VENTRICULAR_CARDIOMYOCYTE	8.52543e-05	0.00420344	0.538434	-0.386593	-1.92993	99	CTSV, KPNA2, CRABP2, TSPAN13, TRAPPC3, TIMM17A, MLLT11, CD24, DEPP1, B3GNT2, GEM, SKIL, PRKDC, ARL4D, PDGFD, LRPAP1, SPINT2, ABHD16A, SLC3A2, CCN1, DGKI, PPP1R15A, HERPUD1, RTCB, TNFRSF12A, KRT19, CCN2, HMGCR, DHCR7, SMTNL2, GET1, HSPA5, HES1, BUB3, NOP16, DENR, IER2, PIP4P2, SLIT2, GMNN, VCAM1, HNRNPL, WDR12, HAMP, VPS33A, DNAJB1, INSIG1, SIGMAR1, TRH, FAM118B, SLC2A1, COMMD10	C8
CUI_DEVELOPING_HEART_ENDOCARDIAL_CELL	8.57455e-05	0.00421962	0.538434	-0.495165	-2.12672	48	PLVAP, FOXC1, COL18A1, FXYD6, LEPR, OLFML3, NPR3, KRT18, CTHRC1, ST6GAL1, ADGRG6, F2RL2, POSTN, DSG2, TFPI, CDH11, ATP1B1, EPS8, PLAC9, ISYNA1, ITGA8, EPHA4, PCDH7, ENG	C8
AIZARANI_LIVER_C18_NK_NKT_CELLS_5	8.68748e-05	0.00426708	0.538434	-0.367454	-1.88059	115	HLA-DQB1, KLF2, HSP90AB1, CEBPB, ANXA1, TGFBI, PLEK, GADD45B, FGL2, HLA-DRA, BAG3, HCK, PHACTR1, TNFAIP2, C3AR1, LST1, AIF1, LAPTM5, ATP6V1B2, TNFRSF1B, NCF1, IER3, S100A11, POU2F2, FCGR2A, PTPN6, MNDA, TYROBP, CSF1R, NPC2, RNF144B, CD37, ADA2, ATP2B1, CCR1, PTPRE, HSPA1B, CLEC7A, HCLS1, IER5, KCTD12, COTL1, FCER1G, MACROH2A1, ALOX5, HSPA1A, LYN, BCL2A1, FGR, GPR183, NCF2, CD83, IRAK3, RNASE6, IT…	C8
GSE28726_NAIVE_VS_ACTIVATED_VA24NEG_NKTCELL_UP	8.76561e-05	0.00429731	0.538434	-0.323402	-1.78711	184	R3HDM1, METTL13, GOT1, KPNA2, ANKLE2, HOPX, HSP90AB1, QPCT, TXN, EIF4A1, SLC29A1, SUCLA2, MATK, ADARB1, PSMD1, MAP2K3, CLIC1, GTF2H4, KDELR2, HNRNPF, SLA, CCT6A, LAMA2, GBP1, BCAT2, PPP2CA, TOMM40, CCL4, ADSL, PCK2, CUL1, LPCAT1, SPINT2, IL18R1, GFUS, PKM, LCP2, FAM98A, PGAP1, GAD1, CDK4, PER2, PSMA6, CTPS1, MYOF, NSMAF, HNRNPA0, ENO1, PSMG1, POLR2H, SPRY1, COPS8, ALG3, TRA2B, COX17, DUSP5, GLS, …	C7	IMMUNESIGDB	Genes up-regulated in Va24- NKT cells: naïve versus activated.
TIEN_INTESTINE_PROBIOTICS_24HR_DN	8.89729e-05	0.00435362	0.538434	-0.310125	-1.72932	196	PRNP, COG5, CREB1, GOT1, MLPH, GLRX, RPL5, PPIB, AKR1C1, CEBPB, RNF19B, CDC5L, JAG1, MIA3, SLC35E1, ATL2, TES, RPL23, NUDT4, BTG1, EIF5A, UBC, STX5, GARS1, MARCHF5, VEGFA, LRRFIP1, RPS3, ACTG1, PDIA4, EEF1G, PCK2, ATF2, PLAAT4, CDC6, SLC3A2, KLF5, ARHGAP35, RACK1, PPP1R15A, HERPUD1, PDIA6, CSNK1A1, S100P, PNRC1, TMED5, SEL1L3, ARF4, NQO1, FNDC3A, CALR, HSPA5, PJA2, CBX4, ESRP1, SERP1, ASNS, TFG, …	C2	CGP	Genes down-regulated in Caco-2 cells (intestinal epithelium) after coculture with the probiotic bacteria L. casei for 24h.
HALMOS_CEBPA_TARGETS_UP	8.95212e-05	0.00437218	0.538434	-0.525597	-2.15073	39	GLRX, IGFBP3, TNFAIP8, BTG1, UAP1, FAS, KLF5, RGS4, HMOX1, IL1R1, FOLR1, PTX3, PTGS2, SEMA3C, ETS2, NFIL3, RGS2, EPHA4, CXCL8, SERPINI1, RAB32, CXCL2, PLIN2, BMP2K, ARL4A, RAB27A, IL4R, ITGA1, CKAP4	C2	CGP	Genes up-regulated in H358 cells (lung cancer) by inducible expression of CEBPA [GeneID=1050] off plasmid vector.
KEGG_LYSOSOME	9.01873e-05	0.00439642	0.538434	-0.372964	-1.88926	109	GNPTG, CTSV, AP3S1, AP3S2, CTSB, LGMN, ATP6V1H, CTSA, GNS, CTSK, DNASE2, LAPTM5, M6PR, AP1G1, CD68, AP3M2, GGA3, ACP5, NPC2, LAPTM4B, SGSH, PPT1, IGF2R, HEXB, ARSG, DNASE2B, GUSB, ABCB9, CTSC, TCIRG1, AP1S1, CLTC, CTSD, CTSH, NAGA, MCOLN1, CTSZ, SLC11A1, MAN2B1, CLTB, ASAH1, FUCA1, CLTA, GGA2, CTSL, PLA2G15, GAA, AP1B1, LIPA	C2	CP:KEGG	Lysosome
HP_DIFFICULTY_STANDING	9.13236e-05	0.00444344	0.538434	0.693629	2.11037	16	TBCE, MYOT, DYM, TK2, DYSF, CLN8, SH3TC2, KY	C5	HPO	Difficulty standing
MODULE_292	9.17794e-05	0.00445724	0.538434	-0.366646	-1.85405	108	HLA-DQA1, HLA-DQB1, GNLY, CYP1B1, LGMN, POLR3B, THBS1, AQP9, CSF3, CD24, HLA-DRA, BLNK, CEBPD, LIMD2, GBP1, CD27, POU2F2, ST6GAL1, MMRN2, IL16, CD37, SAMSN1, CD74, LPAR6, IFITM1, CARD16, CD48, HLA-DMB, GBP2, BANK1, KCTD12, IFITM2, CD86, SERPINA5, LSP1, IFITM3, RUBCNL, CD14, SDC2, HBA2, UCP2, CAMK4	C4	CM	Genes in the cancer module 292.
BURTON_ADIPOGENESIS_PEAK_AT_2HR	9.25097e-05	0.0044843	0.538434	-0.502478	-2.12669	45	FOXC2, THBS1, MAP2K3, BAG3, MYC, BTG2, CEBPD, TNFRSF1B, DUSP1, IER3, CCN1, PPP1R15A, CCN2, HK2, DNAJB6, SLC20A1, PTGS2, SEMA3C, RHOJ, JUNB, ETS2, ID3, SERPINE1, FOS, RGS2, ERRFI1, CXCL2, ZFP36, DNAJB1, IL6, DNAJB4, CDR2	C2	CGP	Cluster 2: genes maximally expressed at 2 h time point during differentiation of 3T3-L1 fibroblasts into adipocytes (cluster 2) in response to adipogenic hormones.
KRCTCNNNNMANAGC_UNKNOWN	9.29361e-05	0.00449654	0.538434	0.491535	2.06775	58	H2AC4, H3C3, H2BC3, H2BC9, H2AC11, H2BC7, H2AC12, H3C7, H3C2, PHACTR3, H2AC17, H2BC17, H2AC14, H4C13, H3C8, H3C11, H2AC13, TMTC4	C3	TFT:TFT_Legacy	Genes having at least one occurrence of the highly conserved motif M120 KRCTCNNNNMANAGC in the regions spanning 4 kb centered on their transcription starting sites [-2kb,+2kb]. The motif does not match any known transcription factor binding site.
DESCARTES_FETAL_PANCREAS_SMOOTH_MUSCLE_CELLS	9.51497e-05	0.00458809	0.538434	-0.60857	-2.17887	24	ACTG2, ACTA2, GJC1, MYH11, CASQ2, AOC3, SGCA, NPTX1, PLN, NDUFA4L2, MUSTN1	C8		descartes DE_gene_by_organ.csv, fold.change>5, qval<0.05, pval<0.05
GSE19888_ADENOSINE_A3R_ACT_VS_TCELL_MEMBRANES_ACT_IN_MAST_CELL_UP	9.51827e-05	0.00458809	0.538434	-0.320385	-1.76331	177	TRPV2, SLC16A12, ADAMTS2, PCOLCE, CPXM1, COL3A1, MYO7A, SERPING1, SLC38A10, DCN, HCST, MS4A6A, ERGIC3, C1R, APOBR, SNED1, SERPINA3, GNAI2, AIF1, CRIP1, MYO1F, GNB5, GPSM3, RCN3, EIF4E3, ITGAM, TYROBP, LUM, BLVRB, HFE, MYO1G, FUT11, NCKAP1L, FERMT3, ARHGAP30, ARPC3, CASP1, MRC2, PID1, ARHGDIB, NRP2, IRF8, SSC5D, AGTRAP, GPX3, GBP2, BLVRA, GNG2, EPS8, IRF1, GNAS, C1QC, RARRES2, LSP1, CTSC, CAPNS1, …	C7	IMMUNESIGDB	Genes up-regulated in HMC-1 (mast leukemia) cells: Cl-IB-MECA [PubChem=3035850] versus T cell membranes.
REACTOME_COLLAGEN_FORMATION	9.54774e-05	0.00459374	0.538434	-0.411887	-1.9689	79	COL1A1, CTSV, COL14A1, COL8A1, CD151, COL1A2, ADAMTS2, COL6A2, PPIB, PCOLCE, CTSB, COL3A1, COL6A3, COL18A1, LAMC2, COL15A1, COL12A1, COLGALT1, PCOLCE2, COL4A2, COL4A1, LOX, COL8A2, COL13A1, PXDN	C2	CP:REACTOME	Collagen formation
GOBP_REGULATION_OF_ION_TRANSPORT	9.69453e-05	0.00465571	0.538434	-0.231513	-1.46251	558	ORAI1, KCNV1, PRNP, TRPV2, PIK3CG, EFHB, DLG4, KCNH5, P2RX5, FXYD7, CEMIP, PRKG2, APP, GLRX, OSR1, CACNA2D4, TSPAN13, CASQ2, FXYD6, PKP2, RAB3A, HPCA, PLA2R1, SYT7, ARL6IP5, CEBPB, GPR35, CALHM1, VAMP8, OPRM1, ATP2B4, KCNQ4, VIP, JPH2, CNR1, PLN, CACNB4, CLIC1, GRAMD2A, ARRB2, OPRK1, KCNH1, ATP8B1, TMEM109, HRC, KCNN4, HTR2A, GJA5, MAP2K6, KCNG3, GNAI2, NEDD4L, VDAC1, PRKACA, GNB5, GEM, TOR1A, CC…	C5	GO:BP	Any process that modulates the frequency, rate or extent of the directed movement of charged atoms or small charged molecules into, out of or within a cell, or between cells, by means of some agent such as a transporter or pore. [GOC:jl]
GOBP_ANTIGEN_PROCESSING_AND_PRESENTATION_OF_PEPTIDE_ANTIGEN	9.84892e-05	0.0047211	0.538434	-0.454651	-2.01197	55	TAPBPL, HLA-DQA1, HLA-DQB1, CTSV, HLA-DRB5, FCGR2B, LGMN, HLA-DRB1, MR1, CD209, PIKFYVE, IFI30, HLA-DOB, HLA-DRA, ERAP2, HLA-B, HLA-A, HFE, HLA-E, CD74, HLA-DMB, FCER1G, ABCB9, CALR, LNPEP, HLA-DOA, CTSD, TREM2, SLC11A1, PYCARD, B2M, HLA-F	C5	GO:BP	The process in which an antigen-presenting cell expresses peptide antigen in association with an MHC protein complex on its cell surface, including proteolysis and transport steps for the peptide antigen both prior to and following assembly with the MHC protein complex. The peptide antigen is typically, but not always, processed from an endogenous or exogenous protein. [GOC:add, ISBN:0781735149, …
WP_TYROBP_CAUSAL_NETWORK_IN_MICROGLIA	9.87135e-05	0.0047231	0.538434	-0.458383	-2.0437	57	GPX1, PLEK, ABCC4, TNFRSF1B, IL18, ITGAM, BIN2, LYL1, TYROBP, RGS1, CD84, NPC2, CD37, SAMSN1, CD4, C3, NCKAP1L, APBB1IP, ADAP2, HCLS1, MAF, C1QC, LHFPL2, TCIRG1, NCF2, RPS6KA1, TMEM106A, NRROS, RNASE6, ITGAX, PYCARD, KCNE3, RUNX3, PPP1R18	C2	CP:WIKIPATHWAYS	TYROBP causal network in microglia
GOBP_CALCIUM_MEDIATED_SIGNALING	0.000100447	0.00479716	0.538434	-0.32182	-1.75682	167	PRNP, EFHB, ADGRL1, P2RX5, SPHK1, POMC, PTGFR, CASQ2, KDR, PPP3CB, MCU, HPCA, ATP2B4, PLEK, PLN, SELE, MTOR, NUDT4, HRC, DEFB1, CCR9, PRKACA, CCR5, GBP1, PPP3CA, ATP2A2, SYK, PTPRC, CCL4, NFATC4, CCL3, CCRL2, PLCG2, LAT2, CD4, CHP1, CCR1, CALM1, PPP1R9A, P2RX4, CLEC7A, ATP1B1, CAMK2D, CD3E, CXCR4, SLC9A1, CACNA1C, PLCE1, LRRK2, SLA2, HOMER2, MCOLN1, TREM2, RCAN2, GSTO1, CXCR1, FHL2, CHRM3, VCAM1,…	C5	GO:BP	Any intracellular signal transduction in which the signal is passed on within the cell via calcium ions. [GOC:signaling]
KIM_WT1_TARGETS_UP	0.000101656	0.004846	0.538434	-0.306389	-1.72486	207	SLPI, IGF2, SPHK1, FN3KRP, BAHD1, APP, FOXC1, PDLIM4, THBS1, VCL, PMM2, CERS6, MAP2K3, HMGCS1, CARD10, MYC, B3GNT2, ACTB, GEM, ACTG1, ZNF365, IER3, IFNGR2, RCOR1, FGF5, CCN1, GLIPR1, FOXD1, SF1, TIMP3, KCTD5, ACTN1, ATP2B1, WWTR1, ATP13A3, RGS4, TNFRSF12A, PRKCD, PTPRE, CX3CL1, RRAS2, ZFP36L1, FOSL2, C3orf52, DOK5, SLC20A1, CSDC2, EPHA2, RND3, TM4SF1, ATP1B1, PHLDA2, PTX3, ENO2, SFN, BAIAP2, SMCO…	C2	CGP	Genes up-regulated in UB27 cells (osteosarcoma) at any time point after inducing the expression of a mutant form of WT1 [GeneID=7490].
GSE23114_PERITONEAL_CAVITY_B1A_BCELL_VS_SPLEEN_BCELL_DN	0.000102745	0.00488755	0.538434	-0.313139	-1.73304	186	CD47, R3HDM1, ATP10D, POP4, HSP90AB1, TXN, EIF3I, EIF4A1, SUCLA2, TIMM17A, ADARB1, PSMD1, KDELR2, HNRNPF, PSMB3, RUNX1, RGS10, VCP, LRRFIP1, LAMA2, PPP2CA, ADSL, ATP6V1A, PDCD2, ZNRD2, PGM1, LPCAT1, SPINT2, IL18R1, GFUS, PKM, SUSD6, PPT1, GAD1, PSME3, SHMT2, CDK4, IL1R1, LPL, NCKAP1, ATP1B3, ENO1, MYDGF, SRGN, GSDME, ALG3, AFAP1, DUSP5, ATP5MC1, NHP2, METTL1, HNRNPA3, RPA3, CPSF4, PDIA5, DIMT1, P…	C7	IMMUNESIGDB	Genes down-regulated in B lymphocytes from: peritoneal cavity versus spleen.
HUMMERICH_SKIN_CANCER_PROGRESSION_UP	0.000102906	0.00488755	0.538434	-0.411183	-1.96097	78	APOC2, COL1A1, ITGA5, COL1A2, EPCAM, CRABP2, CPXM1, COL6A3, COL18A1, GADD45B, RBMS1, MYC, BLMH, TNFRSF1A, IL1RN, LGALS9, SOD2, SAA2, CDKN1A, TNFRSF12A, KRT19, CASP1, HMOX1, ADAM8, PERP, HSPA5, LNX1, IL17RA, IFITM3, ENO1, JUNB, CTSD, NCF2, FOS, RGS2, VCAM1, MMP14, PYCARD, HSPA8, STAT3, S100A6	C2	CGP	Selected genes up-regulated during progression through benign to malignant skin tumors formed by treatment with DMBA and TPA [PubChem=6001;4792] chemicals in the two stage skin carcinogenesis model.
CHAUHAN_RESPONSE_TO_METHOXYESTRADIOL_DN	0.000104589	0.00495839	0.538434	-0.403196	-1.97428	90	PCBP2, AP3S1, HSP90AB1, YWHAB, EIF3M, BTG1, UBC, BTG2, LTA4H, TMSB10, RASA4, EIF3K, SEC61G, S100A10, PTPN6, CCL3, NPC2, CD74, PKM, HERPUD1, ARHGDIB, XBP1, CD48, ATP6V1F, PCP4, HCLS1, PDLIM1, GNAS, LSP1, ENO2, CAPNS1, NUCB1, LGALS1, MARCKS, RPL12	C2	CGP	Genes down-regulated by 2-methoxyestradiol (2ME2) [PubChem=1573] in the MM.1S cell line (multiple myeloma) sensitive to dexamethasone [PubChem=5743].
KATSANOU_ELAVL1_TARGETS_UP	0.000104973	0.00496749	0.538434	-0.335355	-1.79623	146	PLEKHA2, DSP, ATP10D, C19orf33, MYH11, FOXC1, MYO7A, NTN4, SULT4A1, CCDC68, SERPING1, SUSD2, IGFBP2, KRTAP5-2, BMP4, C3AR1, VNN1, LAPTM5, ITPRIPL2, SLC16A4, EBPL, TRIM5, NUPR1, TIMM8B, KCNMB1, FAS, MMP2, CXCL12, FOXD1, FOXF1, MYL12A, IGF2R, ITGA3, PDGFB, DHRS3, TMTC1, GPX3, TNNC1, GALNT11, C1QA, NOTCH3, TGM2, C1QC, OLFML2B, SFN, CTSC, C1QB, COL11A1, ADAMTS5, CTSH, MAP3K7CL, LAMA5, GADD45A, SSBP2,…	C2	CGP	Genes up-regulated in MEF cells (embryonic fibroblast) with ELAVL1 [GeneID=1994] knocked out.
GSE40685_TREG_VS_FOXP3_KO_TREG_PRECURSOR_DN	0.000105433	0.00498015	0.538434	-0.318477	-1.75709	182	CD47, HLA-DQA1, HLA-DQB1, PHACTR2, SOCS3, PAK1, SIGLEC1, GLRX, FZD2, C1S, POLR2B, LGMN, SERPING1, IGFBP4, SECTM1, CD209, KARS1, C1R, OLFML3, HLA-DRA, TCN2, IL12RB1, GPR160, C1RL, FCGR2A, DAPP1, PLAAT4, CUL1, SNX16, TYRP1, CASP4, BATF, MYO1G, CD74, SNTB2, HAPLN3, CASP1, HLA-DMB, ZNF337, IFITM2, ME1, C1QA, LEPROTL1, C1QC, ST8SIA4, GCH1, IFITM3, TBC1D2B, C1QB, TRIM61, HLA-DOA, PECAM1, GPR85, SERPINA…	C7	IMMUNESIGDB	Genes down-regulated in CD4: FOXP3+ [GeneID=50943] T reg versus FOXP3 [GeneID=50943] knockout T reg precursor.
GARCIA_PINERES_PBMC_HPV_16_L1_VLP_AGE_18_25YO_2MO_UP	0.000105927	0.0049944	0.538434	-0.284831	-1.64921	256	BATF3, HLA-DQA1, NAPG, GNLY, COL1A2, ALDH1A2, GGT5, TSPAN13, PREP, CFB, RAB8B, QPCT, SERPING1, TXN, CCL19, LAMC2, NTN1, ISG20, CD209, PLEK, TIMM17A, JAG1, APOBEC3G, C2, KCNN4, CKS1B, NUSAP1, CFH, PPA1, GNB5, SLC2A3, AP1G1, CCL4, PCK2, MNDA, PLAAT4, CDC6, IL1RN, RGS1, TSPAN5, IFITM1, GART, CDKN1A, CASP1, ADAR, SUB1, PGAM1, CSF2RB, MT1H, CASP5, IFITM2, TPI1, PSMD12, CDK7, PHLDA2, AFF4, GCH1, BAX, P…	C7	VAX	Genes up-regulated in peripheral blood mononuclear cell 2m vs 0m in young adults (18-25) after exposure to HPV-16 L1 VLP , time point 2M. Comment: List of DE Genes After Vaccination Using p<0.05 as Cutoff
GOBP_TISSUE_MORPHOGENESIS	0.000106851	0.00502881	0.538434	-0.23783	-1.4843	501	PAX8, AHI1, BRSK1, FRZB, ACTG2, ITGA5, DSP, ACTA2, CD151, PAFAH1B1, SOCS3, PAK1, FOXC2, LIAS, WNT3, ALDH1A2, OSR1, PHLDB2, FZD2, TBX18, COL3A1, KDR, FOXC1, PRKAR1A, NTN4, PKP2, NRP1, PFN1, NPHP3, NTN1, MYH7, VCL, ERBB4, PTK7, CITED2, TGFB1I1, SPINT1, GDF7, WNT6, JAG1, ADARB1, DAAM1, DAB2, IL10, BMP4, PDPN, AJUBA, MTOR, SOX4, MYC, LMO4, COL4A1, VEGFA, ACTB, PRKACA, SULF1, TOR1A, CTHRC1, LCP1, ACTG…	C5	GO:BP	The process in which the anatomical structures of a tissue are generated and organized. [GOC:dph, GOC:jid]
FLETCHER_PBMC_BCG_10W_INFANT_PPD_STIMULATED_VS_UNSTIMULATED_10W_DN	0.000107199	0.00503603	0.538434	-0.32125	-1.7537	167	ZNF366, CD151, SPHK1, ALDH1A2, CTSB, ANXA1, GRN, TGFBI, TNFRSF21, ANXA11, SPINT1, HCST, DAB2, IFI30, IGF2BP2, FGL2, PI4K2A, S100A4, NIBAN2, AIF1, CCR5, STAB1, ITGAM, S100A10, ATP6V1A, MNDA, CSF1R, IL1RN, ICAM5, GLIPR1, MMP19, CCR1, IGF2R, HEXB, HMOX1, SDCBP, LIMS1, CD86, FHL3, FCGRT, ME1, EEF1AKMT3, LPL, PDGFRB, PTGS1, PACSIN2, MYOF, SLC31A1, LHFPL2, SMCO4, HAVCR2, TSPO, CTSD, RPS6KA1, RAB34, SLC…	C7	VAX	Genes down-regulated in peripheral blood mononuclear cell stimulated vs unstimulated in infants (10w) after exposure to BCG (Danish strain BCG Statens Serum Institut, Denmark) , time point 10W. Comment: PBMCs drawn at 10 weeks following immunization at birth
GSE7509_DC_VS_MONOCYTE_UP	0.00010977	0.00514745	0.538434	-0.312464	-1.72931	186	GSTM5, ACTG2, CYP1B1, TSPAN4, MRPL45, RPL5, PHLDB2, CTSB, KIAA0319L, ANXA1, SESN1, TRAPPC3, DCN, KPNA6, DAB2, CNN2, SRSF7, PTGIS, TMED3, TMEM109, PI4K2A, BLNK, LTA4H, COL4A1, C3AR1, PPA1, CCR5, ARL8B, CD68, ACTG1, WBP1L, SMIM14, THBD, GBF1, FOLR2, HFE, CADM1, TIMP3, ADAM8, CSF2RB, CHCHD3, LPL, C1QA, TMEM106C, PTGS1, GNAS, C1QC, GABARAPL1, ENTPD1, C1QB, GTF2B, LGALS1, POR, CTSD, CTSH, RAB34, KDELR…	C7	IMMUNESIGDB	Genes up-regulated in dendritic cells versus monocytes.
GOMF_ENZYME_INHIBITOR_ACTIVITY	0.000110082	0.00515275	0.538434	-0.275898	-1.62011	287	APOC2, GPS2, PRNP, SLPI, PHACTR2, SERPINF1, SOCS3, SCG5, APP, RPL5, ITIH2, COL6A3, PRKAR1A, SERPING1, ANXA1, SPINK2, ATP2B4, IQGAP2, YWHAB, SPINT1, PPP1R14C, OAZ3, PLN, TNFAIP8, OAZ1, PTTG1, FBXO5, RPL23, PPME1, GAS6, SERPINA3, LPA, PHACTR1, WFDC3, CST7, ANXA2, SERPIND1, ELFN1, APLP2, RHOH, CD27, CDKN2D, DTX3L, PPP1R17, PPP1R37, CABIN1, SPINT2, LXN, SKI, TEN1, PRKAR2A, C3, RARRES1, SNCA, CABP1, T…	C5	GO:MF	Binds to and stops, prevents or reduces the activity of an enzyme. [GOC:ai, GOC:ebc]
GSE24634_TEFF_VS_TCONV_DAY3_IN_CULTURE_DN	0.000110753	0.00517479	0.538434	-0.318695	-1.75195	176	LTBP2, CHST15, MARCO, SERPING1, NRP1, CEBPB, THBS1, GPR35, CITED2, PGD, EPB41L3, DAB2, CTSA, IFI30, GNS, FGL2, C2, ECM1, HCK, MAN1C1, CD302, CCR5, APLP2, CD68, MFSD1, SYK, CCL4, KLF6, FCGR2A, MNDA, PLAAT4, NAGK, SPINT2, CCRL2, CD84, AOAH, LPAR6, SNCA, ADA2, PARP6, ADAP2, CCR1, CDKN1A, HMOX1, KCTD12, FCER1G, FCGRT, C1QA, MYOF, RB1, SMCO4, CD14, LILRB4, IDH1, FGR, PILRA, KYNU, SERPINA1, NCF2, MCUB,…	C7	IMMUNESIGDB	Genes down-regulated in comparison of CD25+ T effector cells treated with IL4 [GeneID=3565] at day 3 versus untreated CD25- T cells at day 3.
GSE43955_TH0_VS_TGFB_IL6_TH17_ACT_CD4_TCELL_1H_UP	0.000111469	0.00519886	0.538434	-0.317826	-1.75247	180	NSMCE3, AHI1, SPHK1, SOCS3, FCGR2B, TMEM268, FBXO21, RNF149, PROCR, SELE, FGL2, THAP7, ELAVL4, NUP50, HCK, UBC, TARS2, RAB3IL1, UTP4, CEBPD, CCR5, GPN1, TNFRSF1A, RHOH, CDKN2D, CCL4, BZW2, THBD, PTGER4, CSF3R, SAA1, NAGK, IL1RN, BATF, HLA-E, SUSD6, PPP1R15A, CCR1, LTBP1, ADAR, POSTN, CSF2RB, CHCHD6, LGALSL, CD86, B4GALT3, IRF1, MAP3K8, IL17RA, EIF6, NOCT, MAP2K1, PKIG, PCK1, GSDME, SLC22A5, ELP5,…	C7	IMMUNESIGDB	Genes up-regulated in CD4 [GeneID=920] T helper cells (1h): Th0 versus TGFB1 and IL6 [GeneID=7040;3569].
GOBP_NEGATIVE_REGULATION_OF_MOLECULAR_FUNCTION	0.00011249	0.00523556	0.538434	-0.206864	-1.35232	884	ZNF304, APOC2, GPS2, PRNP, CAND1, SLPI, HABP4, ARHGAP28, PHACTR2, SERPINF1, NDFIP1, CYP1B1, EFHB, SOCS3, FBH1, GPR87, SCG5, APP, RPL5, OSR1, ROCK2, CASQ2, ITIH2, CTSB, COL6A3, PRKAR1A, AOC3, GPX1, SERPING1, HPCA, PLA2R1, THBS1, ANXA1, SPINK2, GPR35, ATP2B4, VTN, PPP4R4, IQGAP2, YWHAB, RCC2, SUMO3, SPINT1, PPM1E, GADD45B, PPP1R14C, ADARB1, CNR1, LEPR, OAZ3, PLN, TNFAIP8, DAB2, OAZ1, PTTG1, PIK3CB,…	C5	GO:BP	Any process that stops or reduces the rate or extent of a molecular function, an elemental biological activity occurring at the molecular level, such as catalysis or binding. [GO:jl]
TURASHVILI_BREAST_DUCTAL_CARCINOMA_VS_LOBULAR_NORMAL_DN	0.00011266	0.00523556	0.538434	-0.452054	-2.00048	55	ZNF154, ACTG2, TAGLN, ATP10D, MYH11, ADH1B, IQCA1, TMEM150C, MGP, ROPN1, ANXA1, MAMDC2, CFD, MUCL1, GHR, SAA1, SYNPO2, CADM1, OXR1, CSNK1A1, CX3CL1, AK5	C2	CGP	Genes down-regulated in ductal carcinoma vs normal lobular breast cells.
LANDIS_ERBB2_BREAST_TUMORS_324_DN	0.000112969	0.00523901	0.538434	-0.339012	-1.80487	140	HLA-DQA1, COL1A1, EIF4EBP1, ACTA2, CD151, MYL9, COL3A1, COL6A3, COL18A1, IGFBP6, NRP1, TGFBI, CYB5A, TMEM43, MRC1, CAVIN3, GJB2, CLEC3B, GAS6, LAMB1, COL4A1, CRIP1, MAN1A1, NKIRAS1, BCAT2, APLP2, DERL1, NDUFV1, THBD, LYL1, CES1, GHR, PGM1, LUM, CXCL12, NPC2, DHRS7, FSTL1, KRT19, YWHAG, POSTN, LY6H, GBE1, GPX3, SNRK, CHCHD10	C2	CGP	Down-regulated genes from the 324 genes identified by two analytical methods as changed in the mammary tumors induced by transgenic expression of ERBB2 [GeneID=2064].
GSE32164_RESTING_DIFFERENTIATED_VS_CMYC_INHIBITED_MACROPHAGE_DN	0.000113282	0.00523901	0.538434	-0.312173	-1.7277	186	ATP6V1D, CTSV, BRAP, GLRX, HOPX, PDCD6, MFHAS1, CAPZB, ELOVL6, ERCC3, HM13, NRP1, TSPYL4, SLC38A10, CD6, FN1, PTTG1, TES, PSMB3, NUP50, MKRN1, RPL19, ALDOA, STX5, S100A4, SEPHS2, CCR5, CCL5, CD27, BZW2, FRMD6, S100A10, FAS, SLC33A1, PTGER4, CSF1R, NABP1, IL18R1, NPC2, NBEAL2, BATF, BRK1, FLOT1, RASSF5, SRGAP2, ZSCAN12, TENT5C, F2R, TMEM176B, COPG1, MACROH2A1, ARHGAP9, HPCAL1, TIMM23, ENO1, CAMK2B…	C7	IMMUNESIGDB	Genes down-regulated in macrophages: resting differentiated versus MYC [GeneID=4609] inhibited.
PID_PDGFRB_PATHWAY	0.000113341	0.00523901	0.538434	-0.357161	-1.84672	122	PIK3CG, TAGLN, NCK2, ACTA2, SPHK1, PAK1, PIK3R5, YWHAB, PIK3CB, ARPC2, SLA, HCK, MYC, MAPK10, YWHAZ, SIPA1, ARPC1B, PPP2CA, ACTR2, JUN, ARHGDIA, YWHAH, BRK1, ARHGAP35, MAPK3, ARPC3, PRKCD, PDGFB, YWHAG, PAG1, ACTR3, PPP2R1A, PDGFRB, EPS8, ITGB3, NCKAP1, SFN, BAIAP2, KRAS, PTEN, LYN, FGR, MAP2K1	C2	CP:PID	PDGFR-beta signaling pathway
GOBP_REGULATION_OF_LEUKOCYTE_MIGRATION	0.000113873	0.00525421	0.538434	-0.316167	-1.73677	175	PLVAP, CCL28, CD47, MADCAM1, APP, LYVE1, MCU, LGMN, CCL19, THBS1, ANXA1, CCN3, MIA3, CAMK1D, SELE, DPP4, ECM1, GAS6, CD300A, STK10, IL27RA, C3AR1, VEGFA, AIF1, GPSM3, DUSP1, CCL5, SPI1, RHOH, APOD, PGF, CCL4, PDGFD, PTGER4, CCL3, CSF1R, LGALS9, CXCL12, CD200R1, TNFSF18, OLFM4, CD74, NCKAP1L, MAPK3, CCR1, HMOX1, ADAM8, CX3CL1, P2RX4, WNT5A, IL1R1, CALR, RARRES2, DOCK8, MDK, LYN, ZP3, PTAFR, IL34, …	C5	GO:BP	Any process that modulates the frequency, rate, or extent of leukocyte migration. [GOC:add]
MARCHINI_TRABECTEDIN_RESISTANCE_DN	0.000114767	0.00528603	0.538434	-0.499296	-2.11322	45	PRNP, ACTA2, COL3A1, EIF4A1, CITED2, COL4A2, ACTG1, HLA-B, SLC3A2, IMPDH1, FSTL1, SLC16A3, RND3, PTTG1IP, CALR, NOTCH3, HSPA5, CBLB, LOXL1, BCAM, HSP90B1, IGFBP7, GPI, CDH13, SLC1A5, BHLHE40, SLC7A5	C2	CGP	Genes down-regulated in chondrosarcoma and ovarian carcinoma cell lines which developed resistance to trabectedin [PubChem=3199].
REACTOME_HDACS_DEACETYLATE_HISTONES	0.000115176	0.00529544	0.538434	0.418953	1.88872	84	H2AC4, H3C3, H2BC3, H4C2, H2BC9, H2AC11, H2BC7, H2AC12, H3C7, H3C2, NCOR1, H2AC17, H2BC17, H2AC14, H4C13, H3C8, H3C11, H4C14, MBD3, H2AC13, SAP18	C2	CP:REACTOME	HDACs deacetylate histones
HP_SUBCUTANEOUS_HEMORRHAGE	0.000115852	0.00531709	0.538434	-0.302793	-1.6856	192	ORAI1, COL1A1, XPR1, ACTA2, COL1A2, MYH11, ADAMTS2, COL3A1, C1S, PRKAR1A, F13A1, F10, ELN, C1R, KDELR2, PLAU, C2, FYB1, ABCC6, RUNX1, HPS1, CFH, PRKACA, TNFRSF1A, LOX, UFD1, STXBP2, FAS, STX11, NABP1, ACP5, UNC13D, NBEAL2, ADA2, LCP2, FERMT3, PRKCD, PDGFB, PLOD1, SAMD9, ATP7B, CALR, PDGFRB, ITGB3, GNAS, HPS3, TNXB, KRAS, PTEN, TCIRG1, LYST, TBL1XR1, HBA1, MAP2K1, HBA2, TNFRSF13C, RREB1, NLRP3, PR…	C5	HPO	Subcutaneous hemorrhage
ZHENG_CORD_BLOOD_C1_PUTATIVE_MEGAKARYOCYTE_PROGENITOR	0.000116201	0.00532364	0.538434	-0.409365	-1.95684	79	RAB27B, PPBP, CCDC68, THBS1, F13A1, VCL, RGS18, PLEK, SPTB, DAAM1, FYB1, ABCC4, CLU, CCL5, MMRN1, NEXN, BIN2, TPM1, FCGR2A, ACTN1, FERMT3, MYL12A, LTBP1, PDGFB, LIMS1, LGALSL, C3orf52, BANK1, RBPMS2, ESAM, PDLIM1, TREML1	C8
GSE11057_CD4_CENT_MEM_VS_PBMC_DN	0.000116438	0.00532509	0.538434	-0.316201	-1.74083	178	TDRD9, CEBPB, RAB3D, F13A1, CD180, SECTM1, PLXNC1, PLEK, EPB41L3, SUSD1, APOBR, TLR6, LTA4H, SCPEP1, CFD, ITPRIPL2, RASGRP4, RHBDF2, CYRIB, APLP2, SPI1, GFOD1, NEXN, NADK, SMIM14, KCNMB1, IFNGR2, STXBP2, ATP6V1A, CES1, NAGK, TM9SF2, RNF144B, AOAH, TBC1D8, ADA2, VNN2, PRKCD, PTPRE, METRNL, ADAMTSL4, PLOD1, TTYH3, GALNT2, FCGRT, MACROH2A1, SH3BP2, PDLIM1, PTGS1, RB1, SLC15A3, RUBCNL, ZDHHC7, HLA-DO…	C7	IMMUNESIGDB	Genes down-regulated in comparison of central memory T cells versus peripheral blood mononuclear cells (PBMC).
CEBP_Q2_01	0.000117389	0.00535913	0.538434	-0.294439	-1.6686	217	PAX8, LHX6, CHST15, FAM91A1, WNT3, ALDH1A2, ADAMTS2, PCDHB4, YRDC, CEPT1, ANO1, SIAH3, ASAH2, DCN, WNT6, CITED4, MAP2K3, MAP2K6, LMO4, NDUFA4L2, MBNL1, TBXAS1, SULF1, PLCB2, LRIT3, FMO2, JUN, NADK, NAT9, CCL3, WEE1, TSPAN5, CCN1, KLF5, NFKBIZ, CADM1, DENND2D, NRXN3, DLG2, PREPL, NRP2, UBE2E2, YWHAG, ZFP36L1, WNT5A, PLS1, CALR, LIPG, CBX4, DYRK3, PTEN, BEND4, C2CD2, ETV5, ADRB2, SLIT3, ADAMTS5, NF…	C3	TFT:TFT_Legacy	Genes having at least one occurrence of the motif NTTRCNNAANNN in the regions spanning 4 kb centered on their transcription starting sites [-2kb, +2kb]. This matches the CEBPA [GeneSymbol=CEBPA] transcription factor binding site V$CEBP_Q2_01 (v7.4 TRANSFAC).
BENPORATH_EED_TARGETS	0.000120245	0.00547984	0.538434	-0.218368	-1.41339	774	PAX8, PRLHR, H3C12, H2AC15, BATF3, KCNV1, GABRA2, PARP12, SLC32A1, NKPD1, CRLF1, LTBP2, COCH, LHX6, SLC10A4, CYP1B1, TMEM65, CREG2, IGF2, DSP, MED31, P2RX5, CEMIP, GABRB2, SLIT1, POLE, RYR3, HTR7, SORCS3, CYP26B1, BMP3, GALNT18, HOPX, OSR1, FZD2, PTGFR, YRDC, CFAP299, DLX5, ADAMTS15, FOXC1, NTN4, NT5C1A, HRK, TMEM59L, HPCAL4, INA, NTN1, ERBB4, PLXNC1, NPTX1, TMEM30B, TRIM9, PPM1E, PPP1R14C, GDF7,…	C2	CGP	Set 'Eed targets': genes identified by ChIP on chip as targets of the Polycomb protein EED [GeneID=8726] in human embryonic stem cells.
P53_DN.V1_UP	0.000121552	0.00552964	0.538434	-0.327878	-1.78777	165	LSR, DSP, CLIP3, COL1A2, CEMIP, EPCAM, OLFML2A, ASS1, COL3A1, FBLN2, CFB, IGFBP6, ANXA1, TGFBI, PTK7, TMEM30B, DAAM1, CNR1, PLAU, BMP4, CD24, KRT18, NR2F2, IL18, NMU, KAT5, SULF1, ZNF165, CDKN2D, UCHL1, COL13A1, SPINT2, KLK10, MSLN, CCN1, KLF5, CALB1, SMAGP, NMNAT2, LTBP1, KRT19, LRRC42, PODXL, S100P, H2AC8, UQCRH, DHRS3, RRAS2, CRYBG1, CDH11, IRF1, MYOF, LHFPL2, TPBG, MARCKS, IFI27, PLCE1	C6		Genes up-regulated in NCI-60 panel of cell lines with mutated TP53 [Gene ID=7157].
TRAVAGLINI_LUNG_VASCULAR_SMOOTH_MUSCLE_CELL	0.000123421	0.00560483	0.518848	-0.467667	-2.10178	59	FRZB, ACTG2, TAGLN, ACTA2, TPM2, MYL9, TPM4, LPP, PDLIM7, JAG1, FHL5, KRT18, TPM1, MCAM, CDH6, MYL6, ACTN1, ARHGDIB, ESAM, TM4SF1, EPS8, NOTCH3, ECRG4, ISYNA1, TINAGL1, HES4, CRIM1, RCAN2, HEYL, MYH9, PARM1, IGFBP7	C8
MEBARKI_HCC_PROGENITOR_WNT_UP	0.000124829	0.00565884	0.518848	-0.319833	-1.73862	161	COL1A1, CYP1B1, ITGA5, COL1A2, ARID3A, SCG5, TPM4, FBLIM1, COL3A1, DLX5, SLC12A8, TGFBI, DCN, PDLIM7, FN1, SPOCD1, OLFML3, RBM24, WFDC3, SLC26A2, CTHRC1, GBP1, PRSS23, LCP1, MDFI, MMP2, CSF1R, LUM, GRAMD1A, TYRP1, RSPO3, CCN1, GLIPR1, ACTN1, CCR1, MRC2, ARHGDIB, MMD, ARHGEF3, BMF, IL1R1, LZTS1, KIF26B, CCDC80, ENO2, SEMA3C, ADAM12, CLIC3, MYADM, MILR1, GCNT1, NOG, USF1, IGFBP5, SERPINE1, PRICKLE2…	C2	CGP	Transcriptome of human HepaRG hepatocellular carcinoma liver progenitors in responses to a WNT3A-enriched microenvironment and dissection of pathways dependent on _-catenin and/or blocked by the SFRP-like Wnt inhibitor FZD8_CRD.
GOBP_ANTIGEN_PROCESSING_AND_PRESENTATION_OF_EXOGENOUS_PEPTIDE_ANTIGEN	0.000125082	0.00566042	0.518848	-0.540202	-2.1112	33	HLA-DQA1, HLA-DQB1, CTSV, HLA-DRB5, FCGR2B, LGMN, HLA-DRB1, PIKFYVE, IFI30, HLA-DOB, HLA-DRA, HLA-A, HLA-E, CD74, HLA-DMB, FCER1G, LNPEP, HLA-DOA, CTSD	C5	GO:BP	The process in which an antigen-presenting cell expresses a peptide antigen of exogenous origin on its cell surface in association with an MHC protein complex. The peptide is typically a fragment of a larger exogenous protein which has been degraded within the cell. [GOC:add, ISBN:0781735149]
LEF1_UP.V1_UP	0.000125963	0.00568789	0.518848	-0.32852	-1.77027	154	ZNF134, CTH, TRPV2, ARG2, LTBP2, NELL2, SLC17A9, SLIT1, CRABP2, MYL9, PDLIM4, IGFBP6, ANO1, FN1, CAVIN3, TMOD1, APOBEC3G, DENND1C, KCNN4, S100A4, CST7, CD302, CRIP1, TNFRSF1B, SLC2A3, ROR2, MAP1B, KCNG1, KCNJ12, NRIP3, SLC5A3, NMNAT2, WNT5A, KCTD12, LPL, EMP3, TGM2, CEACAM21, HSPA1A, PTGDS, LGALS1, HBA2, CXCR4, ISYNA1, TULP2, MIA, TUBB2B, SERPINE1, FOSL1, CXCR1, EGR3, LOXL1, RUNX3, GNAL, IGFBP7, …	C6		Genes up-regulated in DLD1 cells (colon carcinoma) over-expressing LEF1 [Gene ID=51176].
GSE25088_IL4_VS_IL4_AND_ROSIGLITAZONE_STIM_STAT6_KO_MACROPHAGE_DAY10_DN	0.000126129	0.00568789	0.518848	-0.31887	-1.75843	179	GNLY, FLCN, ATP10D, SPHK1, CEMIP, CEPT1, CFB, SERPING1, RBM18, USF3, PIK3R5, PROCR, HLA-DOB, NR4A3, NPR3, VAV1, RETN, GARS1, TNFAIP2, MAML2, IER3, DTX3L, LPCAT1, SPINT2, RNF144B, SOD2, OSTM1, NRIP3, IL4I1, CARD16, PDIA6, PSMA1, PNRC1, P2RX4, CHI3L2, IER5, PIK3AP1, IL1R1, ARF4, CPEB4, ABCC1, TBK1, HRH1, HSPA5, LYN, EBI3, BCL2A1, FGR, MAP2K1, LGALS1, PILRA, CXCL5, TOMM40L, INHBA, ETS2, CCDC93, DUSP…	C7	IMMUNESIGDB	Genes down-regulated in bone marrow-derived macrophages with STAT6 [GeneID=6778] knockout treated with IL4 [GeneID=3565]: control versus rosiglitazone [PubChem=77999].
GOMF_ACTIVE_ION_TRANSMEMBRANE_TRANSPORTER_ACTIVITY	0.000126935	0.0057143	0.518848	-0.300875	-1.68049	198	SLC26A8, ATP6V1D, SLC32A1, SLC47A1, SLC10A4, SLC6A20, SLC24A3, SLC13A4, SLC38A1, COX6B1, SLC19A1, SLC22A8, SLC5A4, SLC47A2, SLC12A8, SLC22A6, SLC6A13, SLC9A5, ATP2B4, ATP6V1H, CYB5A, SLC12A5, ABCC6, ABCC4, SLC9B2, SLC26A2, ATP6V1B2, CYC1, ATP2A2, SLC37A3, SLC33A1, ATP6V1A, SLC3A2, SLC5A3, ATP2B1, ATP13A3, SLC45A1, SLC25A4, UQCRH, ATP6V1F, ATP1A4, SLC39A14, SLC5A6, SLC20A1, ATP7B, ATP1B1, ABCC1, S…	C5	GO:MF	Enables the transfer of an ion from one side of a membrane to the other up the solute's concentration gradient. This is carried out by binding the solute and undergoing a series of conformational changes. Transport works equally well in either direction. [GOC:mtg_transport, ISBN:0815340729]
MODULE_17	0.000127249	0.00571845	0.518848	-0.266452	-1.58757	325	PSMD4, EIF4EBP1, BYSL, GOT1, ARID3A, ALDH1A2, GSPT1, KIF2C, AKR1C1, SF3A1, CDK1, IGFBP4, ANXA1, EIF3I, APEX1, SLC25A46, ATIC, SLC29A1, MLLT11, HMGCS1, PTTG1, NNMT, COL15A1, CD24, TMED3, KRT18, LTBR, MYC, TPX2, CCT6A, IL27RA, RGS10, H2BC12, VEGFA, BLMH, LAPTM5, NMU, SEC13, SLC2A3, H2BC11, TOMM40, H2BC13, PRKDC, IER3, S100A11, MRPS27, SRPRA, PTPRC, TUSC3, MRPL3, MTHFD1, ST6GAL1, LPCAT1, BLVRB, WEE1…	C4	CM	Genes in the cancer module 17.
GSE7460_TCONV_VS_TREG_THYMUS_DN	0.000129482	0.00580873	0.518848	-0.317733	-1.74872	177	ANKRD2, PRNP, TNFSF8, TAF11, FCGR2B, EID2, TSPAN13, ARL6, NTN4, PLAGL1, RAB8B, NRP1, CEBPB, NTN1, FGL2, NIBAN1, S100A4, TNFRSF1B, PTPN9, CCL5, S100A11, PCYOX1L, HLA-B, S100A10, PTGER4, PPP1R37, STX11, PRKRA, IL18R1, RGS1, CASP4, RNPEP, IL10RB, ARHGAP20, PRKAG2, NRP2, SUB1, RRAS, FOSL2, CHCHD10, TMEM176B, MAF, GABARAPL1, MAP3K8, GCH1, NCKAP1, EBI3, PIM1, BCL2A1, MYADM, CD83, SRGN, KCNK1, MCUB, DUS…	C7	IMMUNESIGDB	Genes down-regulated in comparison of TconvThy versus TregThy (see Fig. 1 in the paper for details).
FAN_EMBRYONIC_CTX_BRAIN_EFFECTOR_T_CELL	0.000129834	0.00581443	0.518848	-0.360463	-1.82634	110	STAT4, ABI3, HOPX, TMEM71, IQGAP2, PLEK, HCST, CLIC1, APOBEC3G, BTG1, STK10, S100A4, CST7, CRIP1, LIMD2, LCP1, HLA-B, PTPRC, CCL4, PLAAT4, ITGAL, HLA-A, LY6E, DENND2D, IFITM1, RASSF5, MYL12A, CARD16, CORO1A, TSTD1, ADAM8, CD48, ARHGEF3, AKNA, IFITM2, EMP3, DGUOK, GMFG, IRF1, LSP1, PRKCH, CD3E, CLIC3, FGR, SAMD3, CD7, SRGN, RAC2, RIPOR2	C8
GSE17721_LPS_VS_GARDIQUIMOD_4H_BMDC_DN	0.000130193	0.00581659	0.518848	-0.312073	-1.72669	185	FARSB, MRPL37, SCYL1, BYSL, CASD1, CHTF8, PDCD6, MARCO, CTSB, MMACHC, MRPL46, SF3A1, MYO7A, PPBP, PFN1, B4GALT1, TBPL1, MLLT11, IPO9, MAP3K14, RNF7, CERK, PTPN9, CYRIB, GPN1, KIF3C, IER3, CDCA5, NOS3, SLC19A2, ERO1A, KLHL7, SAA1, IARS1, SDF4, SEC24D, FAM98A, YWHAG, RRAD, PAG1, WNT2B, DYNLRB1, LDHA, PSMD12, PJA2, SLC25A38, MEF2A, EIF5, NCF2, EMC7, USP10, LDAH, ID3, SDHD, VASP, TOPBP1, VAC14, TOMM2…	C7	IMMUNESIGDB	Genes down-regulated in comparison of dendritic cells (DC) stimulated with LPS (TLR4 agonist) at 4 h versus DC cells stimulated with Gardiquimod (TLR7 agonist) at 4 h.
MENON_FETAL_KIDNEY_6_COLLECTING_DUCT_CELLS	0.000130521	0.00581659	0.518848	-0.405269	-1.94239	81	PAX8, AHI1, EPCAM, CYB5A, ARPC2, KRT18, GSTM3, BTG2, NEDD4L, CLU, ANXA2, LRRFIP1, JUN, S100A11, S100A10, KLF6, LRPAP1, SPINT2, MYL12A, MRPL33, CALM1, KRT19, MAL2, TSTD1, ZFP36L1, SCIN, PTBP3, ENO1, AKR1B1, CLTC, CTSH, IER2, FOS, NPNT, ASAH1, B2M	C8
REACTOME_FCGAMMA_RECEPTOR_FCGR_DEPENDENT_PHAGOCYTOSIS	0.000130556	0.00581659	0.518848	-0.408565	-1.96296	82	PAK1, HSP90AB1, WASF1, FCGR1A, MYO1C, PIK3CB, PLD4, ARPC2, VAV1, HCK, ACTB, ARPC1B, ACTG1, ACTR2, SYK, MYO5A, FCGR2A, PLCG2, BRK1, NCKAP1L, MAPK3, ARPC3, PRKCD, WIPF3, ARPC1A, ACTR3, NCKAP1, BAIAP2, LYN, FGR, ITPR3, CYFIP2, CYFIP1, PLPP5, MYH9, CDC42, ABI1, PRKCE, GRB2, FCGR3A, PLD3	C2	CP:REACTOME	Fcgamma receptor (FCGR) dependent phagocytosis
REACTOME_ECM_PROTEOGLYCANS	0.000133098	0.00591968	0.518848	-0.438935	-1.99554	62	COL1A1, FMOD, COL1A2, MATN3, APP, COL6A2, COL3A1, COL6A3, DCN, LAMC1, VTN, FN1, LAMB1, COL4A2, COL4A1, LAMA2, HSPG2, LUM, ITGB3, TNXB, LAMA5, COL4A3, TGFB1, ACAN, LAMA4, ITGAX, SERPINE1, ITGA8	C2	CP:REACTOME	ECM proteoglycans
GOBP_LEUKOCYTE_PROLIFERATION	0.000135291	0.00600687	0.518848	-0.280728	-1.62882	257	PRNP, SLC39A10, PIK3CG, ARG2, NDFIP1, IGF2, NCK2, TNFSF8, CD151, FCGR2B, PRKAR1A, PPP3CB, HLA-DRB1, CEBPB, CCL19, ANXA1, IMPDH2, CD6, CD180, TNFRSF21, CD209, IGFBP2, IL10, BMP4, NPR3, CD24, CD300A, IL27RA, IL12RB1, CLU, LST1, AIF1, TNFRSF1B, IL18, CCL5, RPS3, DOCK2, SYK, PTPRC, PTPN6, MNDA, ST6GAL1, TYROBP, CSF1R, HLA-A, LGALS9, TNFSF18, CCDC88B, CADM1, HLA-E, CD74, NCKAP1L, MAPK3, FLT3, IL4I1, C…	C5	GO:BP	The expansion of a leukocyte population by cell division. [GOC:add]
GOBP_EPITHELIUM_DEVELOPMENT	0.000135726	0.00601587	0.518848	-0.209729	-1.37131	868	PAX8, AHI1, IFT140, ORAI1, LHFPL5, CRLF1, ARG2, BRSK1, FRZB, CREB1, TAGLN, ITGA5, DSP, ACTA2, CD151, IRF6, PAFAH1B1, SOCS3, PAK1, FOXC2, CYP1A1, EPCAM, KLF2, LIAS, EMX1, WNT3, ALDH1A2, CYP26B1, UPK1B, GRHL1, OSR1, ROCK2, RAB25, PHLDB2, FZD2, TBX18, CTSB, DLX5, KDR, FOXC1, AKR1C1, COL18A1, ERCC3, B9D1, DLX6, MYO7A, NTN4, CDK1, GPX1, NRP1, CEBPB, ANXA1, PFN1, NPHP3, NTN1, B4GALT1, VCL, ERBB4, PTK7,…	C5	GO:BP	The process whose specific outcome is the progression of an epithelium over time, from its formation to the mature structure. An epithelium is a tissue that covers the internal or external surfaces of an anatomical structure. [GOC:dph, GOC:mtg_lung]
MODULE_16	0.000136254	0.00602588	0.518848	-0.246714	-1.51254	428	CD47, RPS26, SLPI, CYP1B1, IGF2, EIF4EBP1, ARID3A, GLRX, HTR7, GSPT1, CDV3, SULT4A1, SLBP, ANXA1, APEX1, AGPAT2, CITED2, GNA15, PLEK, PMM2, EPB41L3, TNFAIP8, MAP2K3, PTTG1, PLAU, PLK3, CARD10, NUP50, SLA, SEMA3F, SEMA6C, HCK, MYC, TPX2, CPD, CCT6A, S100A4, CST7, CFD, RGS10, H2BC12, LST1, AIF1, BLMH, LAPTM5, TNFRSF1B, OGG1, M6PR, GPSM3, SLC2A3, CCL5, LCP1, DOCK2, CASP2, TOMM40, CRHR2, PRKDC, IER3,…	C4	CM	Genes in the cancer module 15.
GOZGIT_ESR1_TARGETS_DN	0.000136417	0.00602588	0.518848	-0.223363	-1.42646	635	AHI1, CCL28, MUC20, ULK1, HLA-DQB1, ARG2, LTBP2, CYP1B1, C3orf70, SLC24A3, FLCN, NELL2, FAR2, CEMIP, CYP1A1, CHST15, TC2N, MATN3, MLPH, CRABP2, HTR7, THSD4, GALNT18, CYP2C8, RAB27B, TMEM150C, TSPAN13, STMN3, COL3A1, ABCA5, KDR, AKR1C1, COL18A1, PRKAR1A, CFB, IGFBP6, HLA-DRB1, IGFBP4, NRP1, THBS1, PSD3, ZNF483, AOX1, C11orf52, ISG20, ERBB4, TGFBI, SECTM1, TDRD1, PPM1E, TBC1D9, CAP2, JAG1, LEPR, PR…	C2	CGP	Genes down-regulated in TMX2-28 cells (breast cancer) which do not express ESR1 [GeneID=2099]) compared to the parental MCF7 cells which do.
GOBP_REGULATED_EXOCYTOSIS	0.000136971	0.00604003	0.518848	-0.299928	-1.69533	211	SNAP47, PIK3CG, APBA1, HYAL3, STX1A, RAB11FIP5, FCGR2B, PPP3CB, RAB3A, SYT7, RAB3D, VAMP8, OTOF, PLEK, UNC13A, CNR1, TPH1, NR4A3, HTR2A, CD300A, HCK, GNAI2, ABCC4, PRAM1, SPI1, AP1G1, ARL8B, ATP2A2, CHRNA6, SYK, ITGAM, STXBP2, SNAP25, STX11, CCL3, RAB11FIP1, SV2A, LGALS9, STEAP2, UNC13D, LAT2, CD84, SDF4, NAPB, FOXF1, NCKAP1L, SNCA, CORO1A, HMOX1, PREPL, CADPS, SCIN, CTBP2, SYT13, PTGDS, LYN, ZP3…	C5	GO:BP	A process of exocytosis in which soluble proteins and other substances are initially stored in secretory vesicles for later release. It is found mainly in cells that are specialized for secreting products such as hormones, neurotransmitters, or digestive enzymes rapidly on demand. [GOC:mah, ISBN:0716731363]
GOBP_POSITIVE_REGULATION_OF_DEFENSE_RESPONSE	0.000137542	0.00605335	0.518848	-0.298609	-1.68884	215	CD47, PIK3CG, TLR10, COCH, PAK1, APP, CCN4, POLR3B, CEBPB, GRN, VAMP8, PVR, CNR1, KARS1, AKIRIN2, VAV1, MAPK13, HCK, NINJ1, IL18, GPSM3, CCL5, TRIM5, SPI1, NUPR1, AP1G1, TNFRSF1A, PRKDC, NLRP1, SYK, STING1, PTGER4, MNDA, TYROBP, CCL3, PLCG2, IL16, NFKBIZ, CADM1, HLA-E, C3, IKBKE, SNCA, UBE2K, MAPK3, S100A12, CASP1, ADAM8, CX3CL1, IL1RL1, CLEC7A, WNT5A, LPL, KLK7, ABCC1, TBK1, ALOX5AP, IL17RA, MDK…	C5	GO:BP	Any process that activates or increases the frequency, rate or extent of a defense response. [GOC:mah]
WANG_MLL_TARGETS	0.000137741	0.00605335	0.518848	-0.294189	-1.67648	232	CDO1, FRZB, DEF6, COL14A1, CPZ, FOXC2, ABI3BP, FAM13A, ADH1B, COL6A2, PTGFR, ITIH2, FOXC1, MGP, TBX15, CCDC68, IGFBP6, PLA2R1, ISLR, TGFBI, PLEK, DAB2, UGP2, APOBEC3F, SNED1, DKK3, C2, HTR2A, MAPK13, FAM20A, PTPRM, RAB3IL1, S1PR3, GDA, PCDHB7, EIF4E3, CYP2S1, FOXS1, TGM1, THBD, NFATC4, DAPP1, MMP2, SMOC2, SLC7A2, IL1RN, RNF144B, FOXD1, CDHR1, TWIST2, FUT11, TBC1D8, ATP2B1, KCNC2, MRC2, ARHGDIB, D…	C2	CGP	Genes requiring MLL [GeneID=4297] for H3K4me3 and expression in MEF cells (embryonic fibroblast).
GSE27670_BLIMP1_VS_LMP1_TRANSDUCED_GC_BCELL_UP	0.000138335	0.00606799	0.518848	-0.320963	-1.76263	173	BATF3, APOC2, TSPAN4, COL6A3, NAA40, NRP1, GRN, EIF4A1, FCGR1A, ZNF518B, SHISA5, ADCY7, CPNE6, PLD4, KCNH1, GNS, TMED3, C2, HCK, TEP1, BLNK, GSTM3, TLR6, SSR2, CERK, RAB3IL1, LAPTM5, RASA4, MYO1F, STAB1, KLC2, POU2F2, STXBP2, PCK2, CSF3R, TYROBP, CSF1R, ACP5, ICAM5, PLCG2, SLC3A2, BATF, TEN1, NCKAP1L, FLT3, EDEM2, TENT5C, GMIP, CD48, MTHFR, RAB3B, HCLS1, COTL1, GUSB, ATP1B1, HPCAL1, ADGRG3	C7	IMMUNESIGDB	Genes up-regulated in germinal center B lymphocytes over-expressing: PRDM1 [GeneID=639] versus Epstein-Barr virus protein LMP1.
GSE22886_NAIVE_BCELL_VS_NEUTROPHIL_DN	0.000138543	0.00606799	0.518848	-0.315127	-1.7386	182	SLPI, QPCT, TXN, BID, B4GALT5, SECTM1, PLXNC1, PLEK, AQP9, FGL2, CD300A, HCK, NIBAN1, CFD, NINJ1, LST1, CD302, AIF1, CEBPD, ATP6V1B2, TNFRSF1B, MYO1F, CYRIB, TIMM8B, IER3, S100A11, NADK, BIN2, FAS, FCGR2A, MNDA, CSF3R, TYROBP, SOD2, CASP4, IMPDH1, VNN2, FLOT1, IFITM1, PPT1, S100A12, ADAM8, S100P, CSF2RB, MME, CLEC7A, BCL3, IFITM2, SLC16A3, FCER1G, MTX1, HSPA1A, ADGRG3, IFITM3, PTGS2, CTSC, BCL2A1…	C7	IMMUNESIGDB	Genes down-regulated in comparison of naive B cells versus unstimulated neutrophils.
GOMF_FIBRONECTIN_BINDING	0.000139397	0.00609509	0.518848	-0.579835	-2.15269	27	PLEKHA2, IGFBP6, THBS1, IGFBP3, CTSK, LPA, VEGFA, FBLN1, MMP2, ITGA3, CCN2, SSC5D, CCDC80, ITGB3, LILRB4, ITGA4, IGFBP5	C5	GO:MF	Binding to a fibronectin, a group of related adhesive glycoproteins of high molecular weight found on the surface of animal cells, connective tissue matrices, and in extracellular fluids. [GOC:hjd]
GOBP_DENDRITIC_CELL_MIGRATION	0.000140156	0.00611793	0.518848	-0.577757	-2.18836	29	PIK3CG, CCL19, GAS6, CCR5, CCL5, SPI1, LGALS9, CCR1, ALOX5, CALR, EPS8, DOCK8, ARHGEF5, CXCR4, GPR183, CXCR1, CDC42, SLAMF8, CXCR2, EXT1, TRPM2, CCL21	C5	GO:BP	The movement of a dendritic cell within or between different tissues and organs of the body. [CL:0000451, GOC:nhn, PMID:19339990]
CONCANNON_APOPTOSIS_BY_EPOXOMICIN_UP	0.000141138	0.00614548	0.518848	-0.297228	-1.68454	218	CTH, STX16, ACTA2, LIN37, EPCAM, ALDH1A2, PCSK1, C1S, AKR1C1, PSMD13, CEBPB, ATP2B4, GDF7, CAP2, PSMD1, MAP3K14, TTC39A, CLU, ANXA2, GEM, DUSP1, SKIL, JUN, UFD1, PGF, MAP1B, KLF6, FAS, BLVRB, SLC3A2, YKT6, PPP1R15A, WWTR1, CDKN1A, LGALS8, HMOX1, PLK2, DHRS3, RRAD, DNAJB6, GPX3, SEL1L3, SNRK, SLC16A3, ME1, BSCL2, NQO1, TAC1, PSMD12, PHLDA2, GABARAPL1, ZNF10, HSPA1A, NUCB1, EIF5, TTC1, MAP2, LDAF1,…	C2	CGP	Genes up-regulated in SH-SY5Y cells (neuroblastoma) after treatment with epoxomicin [PubChem=3035402], a protease inhibitor causing apoptosis.
LI_PBMC_MENOMUNE_A_C_Y_W_135_AGE_18_45YO_CORRELATED_WITH_ANTIBODY_RESPONSE_3DY_NEGATIVE	0.000141287	0.00614548	0.518848	-0.635662	-2.15579	20	HLA-DQA1, STAT4, CYP1B1, GPAT3, CCL4, CSF1R, SAMSN1, IL4I1, PRKCD, CCN2, CD86, ANPEP	C7	VAX	Genes negatively correlated with antibody response in peripheral blood mononuclear cell in adults (18-45) after exposure to Menomune A/C/Y/W-135 , time point 3D
CHARAFE_BREAST_CANCER_LUMINAL_VS_MESENCHYMAL_DN	0.000141499	0.00614548	0.518848	-0.248023	-1.52073	429	BICC1, PRNP, LTBP2, WRAP53, ACTA2, ATP10D, PAFAH1B1, SOCS3, NAP1L5, CYP26B1, FBLIM1, COL6A2, PHLDB2, FZD2, C1S, FOXC1, COL6A3, RAB8B, IGFBP6, NRP1, ANXA1, EIF4A1, VCL, TGFBI, LAMC1, TUBB6, TGFB1I1, JAG1, PSMD1, DAB2, CAVIN3, PTTG1, NNMT, LHFPL6, IGF2BP2, PLAU, DHX33, TUBB, DKK3, LAMB1, STK10, COL4A2, COL4A1, PTPRM, ABCC4, MAML2, NID2, SACS, ANXA2, ANKRD28, NEXN, ACTG1, ACTR2, KIF3C, INCENP, RFTN1…	C2	CGP	Genes down-regulated in luminal-like breast cancer cell lines compared to the mesenchymal-like ones.
WP_COMPLEMENT_SYSTEM	0.000146236	0.00634056	0.518848	-0.411912	-1.93302	71	PRNP, C1S, CFB, SERPING1, TXN, THBS1, F13A1, DCN, LAMC1, F10, GNA15, VTN, C1R, SELE, ARRB2, C2, C7, LAMB1, GNAI2, CFD, C3AR1, CFH, PRKACA	C2	CP:WIKIPATHWAYS	Complement system
GOCC_ENDOCYTIC_VESICLE_MEMBRANE	0.000150008	0.00648828	0.518848	-0.324536	-1.76693	164	RAB22A, HLA-DQA1, HLA-DQB1, DLG4, HLA-DRB5, WNT3, MARCO, FZD2, RAB8B, HLA-DRB1, SYT7, VAMP8, FCGR1A, PIKFYVE, WNT6, HLA-DRA, GRIA1, UBC, TLR6, ENTPD7, M6PR, GRIA4, ROR2, STAB1, HLA-B, NOS3, AP2S1, CACNG8, CSF3R, RAB11FIP1, HLA-A, TYRP1, HLA-E, CD4, CD74, AP2M1, CORO1A, IGF2R, AP2B1, WNT5A, RAB35, CALR, CAMK2D, CAMK2B, TCIRG1, TGOLN2, LYN, ADRB2, RAB20, CLTC, RAB34, SYT1, RAC2, RAB8A, MCOLN1, IL7R…	C5	GO:CC	The lipid bilayer surrounding an endocytic vesicle. [GOC:mah]
DESCARTES_FETAL_PANCREAS_MESOTHELIAL_CELLS	0.000150144	0.00648828	0.518848	-0.473781	-2.06369	51	SPHKAP, COL8A1, C19orf33, GAS1, ALDH1A2, INMT, CFB, AOX1, VTN, CHAC1, TMEM151A, TGM1, KLK10, MSLN, KLF5, RARRES1, WNT2B, ATP7B, SMTNL2, COL11A1, GSDME, SERTM1, GPRC5A, KLK5	C8		descartes DE_gene_by_organ.csv, fold.change>5, qval<0.05, pval<0.05
RUTELLA_RESPONSE_TO_HGF_UP	0.000150667	0.00650004	0.518848	-0.25642	-1.5522	376	CD47, LTBP2, SERPINF1, CYP1B1, EIF2B3, SPHK1, CHST15, ADAM28, MFHAS1, CTSB, C1S, AKR1C1, RAB8B, SLC12A8, TXN, ARL6IP5, NRP1, CCL19, PSD3, B4GALT5, FCGR1A, CD209, PVR, ATP6V1H, CYB5A, MATK, EPB41L3, JAG1, AQP9, TNFAIP8, CERS6, RER1, GNS, IL10, NR4A3, CTSK, VAT1, NIBAN1, CPD, TUBA1C, RUNX1, C3AR1, VNN1, IL18, ANXA2, CCR5, RFTN1, PCK2, MMP2, DMXL2, CES1, CCL3, ACP5, CCRL2, SLC3A2, LXN, CD84, SOD2, N…	C2	CGP	Genes up-regulated in peripheral blood monocytes by HGF [GeneID=3082].
GSE17301_CTRL_VS_48H_ACD3_ACD28_STIM_CD8_TCELL_DN	0.000153492	0.00661086	0.518848	-0.315147	-1.73449	177	CCDC115, CD47, CMTM8, PAK1, GLRX, MARCO, ARL6, COL18A1, ANXA1, RNF19B, PIK3R5, GNA15, KCNN4, FYB1, HCK, RNF121, CPD, S100A4, TNFAIP2, CD302, CCL5, BCAT2, SPI1, NUPR1, NADK, ITGAM, POU2F2, PTPN6, PTGER4, STX11, SOD2, AOAH, CASP4, NFKBIZ, C3, IKBKE, CD74, LCP2, FGD3, UBE2F, ABCF3, PID1, ARHGDIB, HSPA1B, RAD23B, CAMK2D, MAP3K8, LYN, EBI3, KCNAB1, POLR2H, TMEM176A, RAB20, PILRA, JUNB, LIMD1, CTSH, IR…	C7	IMMUNESIGDB	Genes down-regulated in CD8 T lymphocytes: control versus activated by anti-CD3 and anti-CD28.
PID_INTEGRIN1_PATHWAY	0.000154368	0.00663757	0.518848	-0.443862	-2.00402	60	COL1A1, ITGA5, COL1A2, COL6A2, COL3A1, COL6A3, COL18A1, THBS1, F13A1, LAMC2, TGFBI, LAMC1, VTN, FN1, PLAU, LAMB1, COL4A1, VEGFA, LAMA2, ITGA3, TGM2, MDK, CD14, ITGA10, LAMB3, COL11A1, LAMA5, COL4A3, ITGA4, LAMA4, ITGA8, NPNT, VCAM1	C2	CP:PID	Beta1 integrin cell surface interactions
MODULE_28	0.000154896	0.00664924	0.518848	-0.558226	-2.15141	31	PSMD4, PSMA7, PSMD13, PSMD1, PSMB3, PSMD8, PSMA1, PSMA6, PSMC4, PSMD12, PSMD3, PSMD2, PSMB7, PSMC6, PSMB4, PSMC1, PSMB5, PSMD14	C4	CM	Genes in the cancer module 28.
GOBP_ANTIGEN_PROCESSING_AND_PRESENTATION	0.000155768	0.00667561	0.518848	-0.397504	-1.94641	90	TAPBPL, HLA-DQA1, HLA-DQB1, YTHDF1, CTSV, HLA-DRB5, FCGR2B, RAB8B, LGMN, HLA-DRB1, CCL19, THBS1, MR1, CD209, PIKFYVE, IFI30, HLA-DOB, FGL2, HLA-DRA, RAB6A, ERAP2, ARL8B, CD68, RFTN1, HLA-B, HLA-A, HFE, HLA-E, CD74, HLA-DMB, RAB3B, RAB35, FCER1G, ABCB9, CALR, LNPEP, HLA-DOA, WDFY4, CTSD, CTSH, RAB34, TREM2, SLC11A1, PYCARD, NOD1, B2M, HLA-F, RAB32, EXT1, CCL21, CTSL	C5	GO:BP	The process in which an antigen-presenting cell expresses antigen (peptide or lipid) on its cell surface in association with an MHC protein complex. [GO_REF:0000022, GOC:add, ISBN:0781735149, PMID:15771591, PMID:15928678]
GNF2_PTX3	0.000156277	0.00668083	0.518848	-0.53673	-2.09763	33	COL1A1, COL1A2, COL3A1, B4GALT1, LAMC1, LAMB1, RCN3, LOX, PXDN, FSTL1, CCN2, PLOD1, CDH11, PTGS1, PTX3	C4	CGN	Neighborhood of PTX3
GSE15930_NAIVE_VS_24H_IN_VITRO_STIM_IL12_CD8_TCELL_DN	0.000156407	0.00668083	0.518848	-0.309619	-1.71311	185	MRPL37, BATF3, CISD1, SLC19A1, TAF11, CDKN2AIPNL, MRPL45, CRABP2, PREP, CDK1, INO80E, IFI30, GTF2H4, THAP7, TMEM109, CKS1B, CCT6A, BLMH, PPA1, NBN, CCR5, PRIM2, PDIA4, NUP85, TACC3, PTGER4, PDCD2, ACAD9, MRPS10, SOD2, MOGS, TPD52L2, OLA1, TMEM97, IRF8, PGAM1, HK2, CHCHD10, MRTO4, LRRC59, RPN1, DHCR7, CTPS1, TPI1, ALDH18A1, PSMD12, PDAP1, NOCT, CSNK2A2, RRP1B, RRP9, MRPL17, PLSCR1, TRIM37, ELOF1, …	C7	IMMUNESIGDB	Genes down-regulated in comparison of CD8 T cells at 0 h versus those at 24 h after stimulation with IL12 .
GAUCHER_PBMC_YF_VAX_STAMARIL_UNKNOWN_AGE_7DY_UP	0.00015683	0.00668727	0.518848	-0.277906	-1.62151	272	PARP12, GALM, PHACTR2, GNLY, TAGLN, ACTA2, FAM8A1, ABI3, MAD2L1BP, MARCO, TMEM268, TIMM10, KIAA0319L, SERPING1, GRN, ISG20, OTOF, SHISA5, GNA15, GADD45B, EPB41L3, IFI30, SUSD1, APOBEC3F, NUSAP1, TCN2, OASL, CD300C, C3AR1, RHBDF2, GBP1, TRIM5, PRAM1, UBA7, CD68, NEXN, CDCA5, STAB1, KCNMB1, PCK2, CUL1, NAGK, CSF1R, HLA-A, IL1RN, LGALS9, SLC3A2, NPC2, LY6E, CD74, ADA2, IFITM1, ADAP2, CCR1, CDKN1A, R…	C7	VAX	Genes up-regulated in peripheral blood mononuclear cell 7d vs 0d in unknown after exposure to YF-Vax/Stamaril , time point 7D
BUSSLINGER_ESOPHAGEAL_LATE_SUPRABASAL_CELLS	0.000157074	0.00668727	0.518848	-0.369838	-1.84601	100	SLPI, DSP, CRABP2, GRHL1, RAB25, TXN, ANXA1, GRN, TUBB6, CITED4, TENT5B, HMGCS1, GJB2, ARPC2, CD24, TUBA1C, NIBAN2, RHCG, TMSB10, ANXA2, ACTB, YWHAZ, FMO2, S100A11, TM7SF2, TGM1, S100A10, NAGK, IL1RN, SOD2, CDKN1A, MAL2, RAB11A, GPX3, CSTB, PERP, CLIC3, TSPO, P4HB	C8
SAGIV_CD24_TARGETS_DN	0.00015735	0.00668801	0.518848	-0.513	-2.13269	42	N4BP3, SPHK1, THBS1, ISG20, CHAC1, UROD, PLAU, ECM1, OASL, OGG1, GEM, MCAM, NAGK, LAT2, FOXD1, CABP1, PPP1R15A, CDKN1A, PDGFB, EMP3, ADRB2, LDB1, DUSP5, EPHB6, CXCL8, GDF15	C2	CGP	Genes down-regulated in HT29 cells (colon cancer) after knockdown of CD24 [GeneID=100133941] by both RNAi and monoclonal antibodies.
GSE3982_DC_VS_EFF_MEMORY_CD4_TCELL_UP	0.000159857	0.00678346	0.518848	-0.314857	-1.7361	180	PEA15, SLC47A1, SLC16A5, SLC19A1, GABRB2, APP, ALDH1A2, PREP, PDLIM4, NDUFA8, GPX1, ADIPOR1, NRP1, TGFBI, ANXA11, ATP6V1H, FN1, CERS6, MRC1, UGP2, HCK, SCPEP1, CFD, SEPHS2, CYC1, IFNGR2, THBD, PCK2, TYROBP, SPINT2, CCRL2, TBC1D8, BASP1, CHP1, ADAP2, CDKN1A, MRC2, HLA-DMB, LRRK1, EIF4E2, NQO1, PSMD12, PTGS1, MYOF, SLC15A3, CTSC, SMCO4, C2CD2, ANPEP, PECAM1, SDC2, KYNU, SERPINA1, CD83, KCNQ1, CD33,…	C7	IMMUNESIGDB	Genes up-regulated in comparison of dendritic cells (DC) versus effector memory CD4 [GeneID=920] T cells.
FAN_OVARY_CL15_SMALL_ANTRAL_FOLLICLE_GRANULOSA_CELL	0.000161329	0.00683471	0.518848	-0.231117	-1.46507	585	PCBP2, CD47, RPS26, CTSV, MPC2, NDFIP1, LSR, CMTM8, DSP, JPT1, NXF1, KPNA2, SCG5, HOPX, HSP90AB1, WASF1, THBS1, PFN1, EIF4A1, TMEM14A, DPM1, CITED2, YWHAB, TIMM17A, MOAP1, GRB14, GADD45B, DAAM1, CLIC1, HERC2, HMGCS1, PTTG1, DUSP14, CACYBP, IGF2BP2, UBE2N, ARPC2, AJUBA, AKIRIN2, SRSF10, RBMS1, KRT18, BAG3, RRN3, SOX4, UBC, CCT6A, RUNX1, B3GNT2, TRMT112, MARCHF5, TMSB10, PPA1, OSGIN2, PNRC2, ACTB, …	C8		The GC of small antral follicles (1-2_mm diameter) clustered pronouncedly in cluster (CL15) showing WT1high/EGR4high/VCANlow/FSTlow expression (Fig. 4b), suggesting that at that stage mural and cumulus GC still have a common progenitor (pGC) signature.
GSE360_L_DONOVANI_VS_B_MALAYI_HIGH_DOSE_MAC_DN	0.000162458	0.00686153	0.518848	-0.307995	-1.70457	186	FXR2, KPNA2, TMEM268, TP53I11, IGFBP4, CNPY3, SECTM1, GNA15, STAT6, CNR1, CTSA, TTC39A, SNED1, ELAVL4, VAV1, OGDH, CD302, MYO1F, EIF3K, SEC13, SULF1, SIPA1, GBP1, CCL5, DOCK2, UBA7, CD27, DIAPH1, STAB1, SOD1, PCK2, FOLR2, ITGAL, LGALS9, PLCG2, ADGRE1, AOAH, CD37, IMPDH1, ACTN1, SUSD6, CORO1A, CROT, PRKCD, HLA-DMB, SH3BP1, IRF1, HPCAL1, SLN, IFITM3, CAPNS1, CLCN6, C1QB, AKR1B1, NIT1, RPL12, VGLL4,…	C7	IMMUNESIGDB	Genes down-regulated in comparison of macrophages exposed to L. donovani versus macrophages exposed to 50 worms/well B. malayi.
CHARAFE_BREAST_CANCER_LUMINAL_VS_BASAL_DN	0.000162492	0.00686153	0.518848	-0.243428	-1.48753	406	BICC1, PRNP, SLPI, STAT4, COL8A1, ATP10D, GJC1, GAS1, FBLIM1, PHLDB2, C1S, SVIL, AKR1C1, CFB, PKP2, IGFBP6, NRP1, ANXA1, LAMC2, TBPL1, TGFBI, LAMC1, PTK7, GNA15, ORMDL1, TUBB6, CDC42EP3, PPP1R14C, JAG1, TNFAIP8, C1R, CAVIN3, CCDC28A, NNMT, IGF2BP2, PLAU, ARPC2, DEPP1, RBMS1, NUP50, SCPEP1, COL4A2, COL4A1, PTPRM, ERAP2, CEBPD, MAML2, IL18, ANXA2, MBNL1, SP100, GBP1, MMADHC, LOX, GFOD1, TM2D1, STIN…	C2	CGP	Genes down-regulated in luminal-like breast cancer cell lines compared to the basal-like ones.
GOBP_CHROMATIN_ASSEMBLY_OR_DISASSEMBLY	0.000165443	0.00697411	0.518848	0.325979	1.67235	190	H3C3, H2BC3, H4C2, H2BC9, H2BC7, H3C7, BAZ1A, TRIM28, H3C2, ARID2, ATF7IP2, ASF1B, HIRIP3, H2AX, H2BC17, H4C13, SMARCA5, H3C8, NRDE2, UBN2, SMCHD1, L3MBTL1, DAXX, H3C11, BEND3, H4C14, PADI2, MBD3, SETDB1, SMARCE1, TASOR, RRP8, MPHOSPH8, RESF1, SMARCC1, RSF1, CDAN1, NAP1L4, HIRA, SUV39H2, SHPRH, ZNFX1, TET1, CHAF1A, ATF7IP, CHRAC1, CTCF, HDAC1, H1-6, PARP10, OIP5, ARID1A, SIRT1, RIF1, H1-10	C5	GO:BP	The formation or destruction of chromatin structures. [GOC:mah]
SIMBULAN_PARP1_TARGETS_UP	0.000165948	0.00697411	0.518848	-0.577049	-2.14235	27	COL8A1, APP, MGP, IGFBP6, IGFBP4, DCN, CCN3, ELN, TIMP3, CDKN1A, LY6H, GPX3, SERPINE2, TINAGL1	C2	CGP	Genes up-regulated in MEF cells (embryonic fibroblasts) from PARP1 [GeneID=142] knockout mice.
HARALAMBIEVA_PBMC_M_M_R_II_AGE_11_22YO_VACCINATED_VS_UNVACCINATED_7YR_DN	0.000165967	0.00697411	0.518848	-0.225695	-1.43817	618	PTGFRN, SLC47A1, LTBP2, APBA1, CYP1B1, DLG4, EIF4EBP1, FXYD7, TSPAN4, GAS1, FAM13A, KLF2, FCGR2B, HTR7, HOPX, CACNA2D4, SLC47A2, COL6A3, GIPC3, COL18A1, TMEM71, MYO7A, NTN4, ADAM22, LILRB5, RAB3A, PPBP, CCDC68, QPCT, RAB3D, SIAH3, VAMP8, F13A1, TGFBI, FCGR1A, RGS18, CD209, ANKRD34A, CCN3, HCST, MATK, MS4A6A, FN1, TFCP2L1, DAB2, CTSA, MRC1, JAML, ARRB2, LRMDA, CNN2, CD300LF, SIRPB2, COLGALT1, SEMA…	C7	VAX	Genes down-regulated in peripheral blood mononuclear cell vaccinated vs unvaccinated in adolescent/young adults (11-22) after exposure to M-M-R II , time point 7Y
MODULE_234	0.000166362	0.00697937	0.518848	-0.507713	-2.12333	43	COL1A1, FRZB, CNMD, IGF2, FGFR1, DLX5, MGP, BMP4, NPR3, CLEC3B, COL12A1, GHR, LUM, PRELP, POSTN, TWIST1, COL11A1, INHBA, ETS2, AEBP1, JAK3, MSX1, SPARC, FBN1, IL6, BMP1, IL6R, TIE1	C4	CM	Bone remodeling.
GOBP_REGULATION_OF_ANATOMICAL_STRUCTURE_MORPHOGENESIS	0.000172308	0.00721714	0.518848	-0.217149	-1.40673	781	PAX8, AHI1, ZNF304, ULK1, TRPV2, COCH, BRSK1, SERPINF1, CYP1B1, CNMD, DLG4, ITGA5, SPHK1, PAFAH1B1, PAK1, FOXC2, ABI3, SLIT1, KLF2, WNT3, CRABP2, PDCD6, FBLIM1, OSR1, ROCK2, PHLDB2, FZD2, TBX18, CAPZB, KDR, FOXC1, NTN4, MCU, ADAMTS1, NRP1, FGD5, THBS1, ANXA1, GRN, NPHP3, NTN1, ATP2B4, DCN, PLXNC1, PTK7, CITED2, RCC2, CDC42EP3, CPNE6, UNC13A, EPB41L3, FN1, DAAM1, DAB2, PIK3CB, ARHGAP15, IL10, BMP4…	C5	GO:BP	Any process that modulates the frequency, rate or extent of anatomical structure morphogenesis. [GOC:mah]
MODULE_19	0.000173672	0.00726252	0.518848	-0.279268	-1.63259	275	PDE4C, IGF2, COL1A2, MYH11, TPM2, ADH1B, GLRX, MYL9, COL6A2, PCOLCE, C1S, AKR1C1, SORBS2, AOC3, IGFBP6, QPCT, IGFBP4, AGPAT2, AOX1, CITED2, VTN, IQGAP2, SLC29A1, CCN3, CYB5A, EPB41L3, DAB2, MRC1, MAP2K3, COL15A1, PLK3, CLEC3B, C7, LTBR, TNFAIP2, COL4A1, CFD, VEGFA, SLC26A2, MBNL1, NUPR1, HSPG2, WDR7, TM7SF2, ROR2, APOD, STAB1, TPM1, TUSC3, LUM, PLCG2, CADM1, GSTA4, TIMP3, PPP1R15A, WWTR1, FSTL1, …	C4	CM	Adrenal gland - metabolic genes.
GOBP_BLOOD_VESSEL_MORPHOGENESIS	0.000176104	0.00735236	0.518848	-0.2344	-1.46557	507	ZNF304, PIK3CG, SERPINF1, CYP1B1, CNMD, ITGA5, COL8A1, SPHK1, GJC1, FOXC2, KLF2, PDCD6, ROCK2, COL3A1, KDR, FOXC1, COL18A1, ADAMTS1, GPX1, NRP1, THBS1, ANXA1, GRN, B4GALT1, ATP2B4, TGFBI, DCN, CITED2, CCN3, JAG1, FN1, LEPR, MIA3, PIK3CB, COL15A1, IL10, BMP4, PTGIS, CARD10, EFNA1, ECM1, BTG1, GJA5, SOX4, RUNX1, TNFAIP2, COL4A2, COL4A1, NIBAN2, PTPRM, NINJ1, C3AR1, VEGFA, NR2F2, IL18, ANXA2, YWHAZ,…	C5	GO:BP	The process in which the anatomical structures of blood vessels are generated and organized. The blood vessel is the vasculature carrying blood. [GOC:jid]
WP_NETWORK_MAP_OF_SARSCOV2_SIGNALING_PATHWAY	0.000180227	0.00749346	0.518848	-0.322285	-1.75467	164	ULK1, EIF4EBP1, HLA-DRB5, CTSB, C1S, CFB, CDK1, HLA-DRB1, CEBPB, BID, FN1, IGFBP3, C1R, IL10, MTOR, HLA-DRA, CFH, VPS36, IL18, ACTB, CCR5, DUSP1, TRAF2, CCL5, ACTG1, JUN, APOD, NLRP1, CCL4, PTPN6, SAA1, CCL3, CXCL12, IL16, CD4, IFITM1, SAA2, ITGA3, WDR74, JAK1, RRAS, CASP5, SERPINA5, CCNB1, TBK1, IRF3, IFITM3, PTGS2, CD3E, CD14, JUNB, CXCL5, CTSD, IFI27, CAMK4, NLRP3, LGALS3BP, SERPINE1, FOS, CXC…	C2	CP:WIKIPATHWAYS	Network map of SARS-CoV-2 signaling pathway
REACTOME_COLLAGEN_BIOSYNTHESIS_AND_MODIFYING_ENZYMES	0.000180336	0.00749346	0.518848	-0.441428	-1.99303	60	COL1A1, COL14A1, COL8A1, COL1A2, ADAMTS2, COL6A2, PPIB, PCOLCE, COL3A1, COL6A3, COL18A1, COL15A1, COL12A1, COLGALT1, PCOLCE2, COL4A2, COL4A1, COL8A2, COL13A1	C2	CP:REACTOME	Collagen biosynthesis and modifying enzymes
REACTOME_ERCC6_CSB_AND_EHMT2_G9A_POSITIVELY_REGULATE_RRNA_EXPRESSION	0.000180353	0.00749346	0.518848	0.453279	1.96481	68	H2AC4, H3C3, H2BC3, H4C2, H2BC9, H2BC7, H3C7, H3C2, ERCC6, H2AX, H2BC17, H2AC14, H4C13, H3C8, H3C11, H4C14, MBD3	C2	CP:REACTOME	ERCC6 (CSB) and EHMT2 (G9a) positively regulate rRNA expression
REACTOME_OXIDATIVE_STRESS_INDUCED_SENESCENCE	0.000182009	0.00753127	0.518848	0.38952	1.85508	115	H2AC4, H3C3, H2BC3, H4C2, H2BC9, H2BC7, H3C7, H3C2, AGO4, AGO1, AGO3, H2AX, PHC1, H2BC17, TNRC6C, H2AC14, H4C13, H3C8, MAP2K7, MAPKAPK2, MAP4K4, H3C11, H4C14, CDKN2A, CDK6, BMI1, CBX8	C2	CP:REACTOME	Oxidative Stress Induced Senescence
GOMF_METHYL_CPG_BINDING	0.000182123	0.00753127	0.518848	0.63834	2.07569	20	LHX4, CXXC5, MBD3, ZBTB4, ZCWPW1, UHRF1, TET1	C5	GO:MF	Binding to a methylated cytosine/guanine dinucleotide. [GOC:jl, PMID:11746232]
DESCARTES_FETAL_LUNG_CILIATED_EPITHELIAL_CELLS	0.000182135	0.00753127	0.518848	0.297101	1.62812	328	C22orf15, FRMPD2, C22orf23, ANXA13, SMIM6, CFAP43, EFCAB6, TP73, FLACC1, FAM47E, RSPH9, KIF6, NME9, ZBBX, DNALI1, CABCOCO1, LRRC51, DERL3, CDH26, KCNRG, MOBP, WDR93, FAM229B, TCTE1, RIBC2, FAM181A, DCDC2B, CDNF, LMO1, DNAH1, ULK4, DNAI1, CCDC146, CCNO, DNAI7, CNGA4, LRRC43, FOXJ1, DNAH6, OMG, SPATS1, KATNIP, LRGUK, COL28A1, FAM221B, PIH1D2, DTHD1, MAP3K19, PPIL6, MAK, LRP2BP, DNAH10, FSIP1, CAPN1…	C8		descartes DE_gene_by_organ.csv, fold.change>5, qval<0.05, pval<0.05
REACTOME_ANTIGEN_PROCESSING_CROSS_PRESENTATION	0.000183531	0.00757686	0.518848	-0.374333	-1.84513	94	PSMD4, CTSV, PSMA7, PSMD13, VAMP8, FCGR1A, PSMD1, MRC1, PSMB3, UBC, TLR6, SEC61A2, NCF1, SEC61G, HLA-B, HLA-A, HLA-E, PSMD8, PSMA1, MRC2, PSME3, PSMA6, PSMC4, CALR, PSMD12, LNPEP, CD14, PSMD3, NCF2, PSMD2, PSMB7, PSMC6, PSMB4, PSMC1, SEC61B, TLR1, SEC61A1, B2M, HLA-F, PSMB5, MYD88, PSMD14, CTSL, S100A8, PDIA3	C2	CP:REACTOME	Antigen processing-Cross presentation
DESCARTES_FETAL_CEREBRUM_INHIBITORY_NEURONS	0.000184926	0.00762229	0.518848	-0.638481	-2.22539	22	CRABP1, FNDC9, BMP3, DLX5, DLX6, NNMT, TAC3, PDYN, GPR6, SCGN, RELN	C8		descartes DE_gene_by_organ.csv, fold.change>5, qval<0.05, pval<0.05
JOHNSTONE_PARVB_TARGETS_2_UP	0.000185494	0.00763356	0.518848	-0.349892	-1.82085	126	LSR, CD151, RPL5, AKR1C1, UBE2V1, IGFBP6, HLA-DRB1, IGFBP4, AGPAT2, CITED2, MOAP1, ERGIC3, ECM1, KRT18, OGDH, MAMDC2, GNAI2, GSTM3, OASL, PCOLCE2, ACTB, APLP2, GFOD1, ACTG1, S100A11, LYSMD2, HLA-B, ARHGDIA, STXBP2, PLAAT4, HLA-A, CCRL2, CLPTM1L, LY6E, CD74, BASP1, PKM, IFITM1, UBE2L6, SEL1L3, COTL1, CALR, KCTD13, CAVIN1, MDK, AKR1B1, CXCR4, IFI27	C2	CGP	Genes up-regulated upon overexpression of PARVB [GeneID=29780] in MDA-MB-231 cells (breast cancer) cultured in 3D collagen I and 3D Matrigel only.
GSE18804_SPLEEN_MACROPHAGE_VS_COLON_TUMORAL_MACROPHAGE_UP	0.000188501	0.00774499	0.518848	-0.30816	-1.70649	187	COL1A1, SSTR3, CTSV, MFAP4, DEF6, SLC38A1, FAR2, VHL, TMEM150C, MEAF6, CPXM1, ADAMTS15, ELOVL6, CCL19, RCN1, PLXNC1, ELN, IFI30, PAQR7, OLFML3, CSF3, DKK3, TMED3, CST7, RGS10, C3AR1, SLC9B2, DOCK2, CYTH4, PPP1R17, PTPN6, GMDS, CERS5, AOAH, LY6E, CMTM7, DHRS7, RARRES1, PPT1, MAP4K1, ARSG, DBNL, COTL1, ALOX5, SH3BP2, ANAPC1, BAX, DOCK8, CHSY1, CTSC, ADAM12	C7	IMMUNESIGDB	Genes up-regulated in macrophages: control versus colorectal adenocarcinoma conditioned.
GSE37532_VISCERAL_ADIPOSE_TISSUE_VS_LN_DERIVED_TCONV_CD4_TCELL_UP	0.000189598	0.00777771	0.518848	-0.373951	-1.84325	94	CTH, SPHKAP, CENPH, CHST15, MGAT4C, EMX1, PDCD6, GPR158, JPH2, VAV1, ANXA2, ACTG1, PRIM2, ATP2A2, SLC37A3, ICAM5, KLK10, SDF4, SNCA, KIRREL1, PID1, TMTC1, DNASE2B, ARPC1A, BLVRA, LMO3, STRIP1, TGM2, SLC27A2, MRPS5, P4HB, CCDC85A, GSTO1, EPHA4, ODC1, STAT3, CDT1, SIPA1L1, NOP56, VASH2, PLIN2, MPZL2, KCNS3, PTGER2, RPL7A, GOSR2, PTPN20, B3GALNT1, SLC43A1, SUGP2, EIF2AK4, ATP6V1E1, MAEL, SCN3B, FZD6	C7	IMMUNESIGDB	Genes up-regulated in T conv from aged mice: visceral adipose tissue versus lymph node.
MODULE_345	0.000190623	0.00780739	0.518848	-0.367917	-1.83642	100	HLA-DQA1, HLA-DQB1, GNLY, CYP1B1, LGMN, POLR3B, THBS1, AQP9, CSF3, HLA-DRA, BLNK, CEBPD, LIMD2, GBP1, CD27, POU2F2, HLA-A, CD37, SAMSN1, CD74, LPAR6, ZNF436, IFITM1, CARD16, UBE2L6, HLA-DMB, GBP2, BANK1, KCTD12, CD86, SERPINA5, IFITM3, RUBCNL, CD14, SDC2, HBA2, IFI27, CAMK4	C4	CM	Immune response and Ag processing and presentation.
GOBP_SECRETION	0.000193086	0.0078958	0.518848	-0.216942	-1.40118	746	PAX8, SNAP47, PIK3CG, SLC32A1, LTBP2, APBA1, CDO1, BRSK1, MPC2, FBLN5, HYAL3, CREB1, STX1A, PAFAH1B1, PAK1, SLC17A9, RAB11FIP5, FCGR2B, SCG5, PCSK1, RAB27B, POMC, RAB25, PPP3CB, OSBP, RAB8B, MCU, RAB3A, HLA-DRB1, PLA2R1, SYT7, ANXA1, RAB3D, ANO1, VAMP8, OPRM1, ERBB4, OTOF, ARFGEF2, SLC29A1, PLEK, CCN3, VIP, UNC13A, C1QTNF1, AQP9, CNR1, MIA3, DAB2, TPH1, OPRK1, SYTL3, NR4A3, EXOC8, NPR3, KCNN4, HT…	C5	GO:BP	The controlled release of a substance by a cell or a tissue. [GOC:ai]
GSE22886_NAIVE_CD4_TCELL_VS_DC_DN	0.000194334	0.00793426	0.518848	-0.297765	-1.65761	192	ATP6V1D, CTSB, PRKAR1A, NDUFA8, GPX1, HLA-DRB1, GRN, VAMP8, TGFBI, TIMM17A, PGD, IFI30, FGL2, HLA-DRA, PI4K2A, TUBA1C, VDAC1, ATP6V1B2, M6PR, TIMM8B, ARL8B, NFE2L1, S100A11, MFSD1, GNG10, SYK, AP2S1, MNDA, ACP5, PLCG2, TM9SF2, CD74, AP2M1, BASP1, KCTD5, CCR1, PPT1, PRKCD, SDCBP, PLOD1, PGAM1, LIMS1, CLEC7A, PLEKHB2, CSTB, FCGRT, MLX, MACROH2A1, MGAT2, HSPA1A, CTSC, SMCO4, CAPRIN1, IDH1, NCF2, CTS…	C7	IMMUNESIGDB	Genes down-regulated in comparison of naive CD4 [GeneID=920] T cells versus unstimulatd dendritic cells (DC).
CLASPER_LYMPHATIC_VESSELS_DURING_METASTASIS_DN	0.00019535	0.00794896	0.518848	-0.544029	-2.11301	32	LTBP2, COL1A2, FOXC2, COL6A2, PCOLCE, COL3A1, COL6A3, PCOLCE2, S1PR3, LAMA2, LOX, SYK, TWIST2, LTBP1, CDH11, SEMA3C, EMILIN2, SDC2	C2	CGP	Selected genes down-regulated during invasion of lymphatic vessels during metastasis.
KIM_LIVER_CANCER_POOR_SURVIVAL_UP	0.000195569	0.00794896	0.518848	-0.637125	-2.22066	22	SLC38A1, SPHK1, JPT1, IGFBP3, ARPC2, LAMB1, ALDOA, RGS1, PKM, PPT1, TM4SF1, CTSC, ETV5, CXCR4, RGS2	C2	CGP	Genes over-expressed in hepatocellular carcinoma (HCC) with poor survival
MMS_MOUSE_LYMPH_HIGH_4HRS_UP	0.000195615	0.00794896	0.518848	-0.563894	-2.11568	28	PRKAR1A, CYB5A, PTDSS1, LMO4, ACTG1, ATP6V1A, CDC6, XBP1, SPIN1, NQO1, NOCT, CXCR4	C2	CGP	Up-regulated at 4 hours following treatment of mouse lymphocytes (TK 3.7.2C) with a high dose of methyl methanesulfonate (MMS)
GSE41176_WT_VS_TAK1_KO_ANTI_IGM_STIM_BCELL_3H_DN	0.000196251	0.00794987	0.518848	-0.312567	-1.72347	180	CD47, CYP1B1, POLR1C, BYSL, DDX27, PPIB, CEBPB, GRN, IQGAP2, TIMM17A, ATP6V1H, TBC1D9, LTBR, PHACTR1, ANXA2, M6PR, GPSM3, GEM, NBN, CCR5, TOMM40, GYPC, S100A11, PTPN6, IL1RN, CCRL2, BATF, MPV17, CCR1, PDIA6, PSMD8, IGF2R, S100P, ATP6V1F, CDK4, HK2, LIMS1, RAD23B, PLEKHB2, CSTB, LPL, ALOX5AP, NSMAF, LSP1, LHFPL2, DYRK3, HES1, AKR1B1, PSMD3, PTAFR, MYDGF, SERPINA1, CTSD, INHBA, GSDME, RIPOR2, CRIM1…	C7	IMMUNESIGDB	Genes down-regulated in B lymphocytes treated by anti IgM for 3h: wildtype versus MAP3K7 [GeneID=6885] knockout.
HALLMARK_KRAS_SIGNALING_UP	0.000196251	0.00794987	0.518848	-0.312292	-1.72195	180	PLVAP, SLPI, IGF2, ITGBL1, PRKG2, SCG5, GLRX, ALDH1A2, TSPAN13, YRDC, CFB, PPBP, NRP1, ANO1, F13A1, EPB41L3, IGFBP3, TPH1, PLAU, KCNN4, IL1RL2, SERPINA3, RETN, C3AR1, CFH, LAPTM5, TNFRSF1B, LCP1, DOCK2, GUCY1A1, GYPC, AVL9, APOD, ERO1A, ST6GAL1, SNAP25, LAT2, CD37, PPP1R15A, CROT, ADAM8, MAP4K1, IRF8, MMD, PCP4, RELN, PTPRR, TFPI, TMEM176B, FCER1G, PTGS2, ETV5, PECAM1, TMEM176A, CXCR4	H		Genes up-regulated by KRAS activation.
GOBP_POSITIVE_REGULATION_OF_CHEMOTAXIS	0.000196794	0.0079594	0.518848	-0.351925	-1.79907	114	FGFR1, KDR, MCU, LGMN, NRP1, CCL19, THBS1, CAMK1D, GAS6, C3AR1, VEGFA, AIF1, GPSM3, CCL5, SPI1, PGF, CCL4, PDGFD, SMOC2, CCL3, CSF1R, LGALS9, CXCL12, IL16, CD74, NCKAP1L, MAPK3, CCR1, PDGFB, P2RX4, WNT5A, CALR, PDGFRB, RARRES2, MDK, TPBG, CXCR4, IL34, RAC2, RIPOR2, TGFB1, TREM2, NTRK3, SERPINE1, SLIT2, FGF18, CXCL8, PLA2G7, AGER, CCL21, EDN3, IL6, PTN, PRKD1, ARTN, OXSR1, IL6R, CDH13, STX3, FPR2,…	C5	GO:BP	Any process that activates or increases the frequency, rate or extent of the directed movement of a motile cell or organism in response to a specific chemical concentration gradient. [GOC:ai]
GOBP_CELL_CELL_RECOGNITION	0.000197312	0.00796791	0.518848	-0.482644	-2.02847	44	SPESP1, NCK2, ST6GALNAC6, CCL19, B4GALT1, CD6, CD209, ALDOA, DOCK2, CCT5, FOLR2, CORO1A, CLGN, POMZP3, CCT2, CCT7, FOLR1, DOCK8, OVGP1, ZP3, HAVCR2	C5	GO:BP	Cell recognition between cells. May involve the formation of specialized cell junctions. [ISBN:0824072820]
GSE11057_CD4_EFF_MEM_VS_PBMC_DN	0.000197896	0.00797905	0.518848	-0.311468	-1.71842	182	PEA15, GPX1, CEBPB, RAB3D, CD180, RGS18, PLXNC1, PLEK, PGD, EPB41L3, AQP9, OAZ1, CD300LF, BLNK, LTA4H, SCPEP1, CD300C, CFD, ATP6V1B2, APLP2, SPI1, GFOD1, NEXN, NADK, MFSD1, SYK, IFNGR2, BMP6, DAPP1, ATP6V1A, NAGK, BLVRB, AOAH, CD74, TBC1D8, ADA2, ARPC3, PRKCD, PTPRE, ADAMTSL4, SDCBP, PLOD1, YWHAG, HLA-DMB, GLT1D1, TTYH3, MACROH2A1, PDLIM1, C15orf39, PTGS1, SLC15A3, LYST, MEF2A, ZDHHC7, HLA-DOA, W…	C7	IMMUNESIGDB	Genes down-regulated in comarison of effector memory T cells versus peripheral blood mononuclear cells (PBMC).
GSE43955_1H_VS_42H_ACT_CD4_TCELL_WITH_TGFB_IL6_DN	0.000198492	0.00799063	0.518848	-0.313465	-1.71121	167	APOC2, PRNP, COL1A1, ZIK1, TAGLN, FKBP9, STMN3, MGP, B9D1, NRP1, LPP, FCGR1A, SHISA5, TUBB6, KARS1, PTTG1, IL10, CTSK, TEP1, TUBA1C, C3AR1, VNN1, AIF1, CCR5, TM7SF2, PGF, ITGAM, FOLR2, LY6E, YWHAH, TWIST2, RPL39L, TIMP3, ACTN1, IKBIP, RGS4, ADAM8, VTA1, HK2, DBNL, RAD23B, TMEM176B, ME1, ACTR3, TM4SF1, LPL, SERPINE2, ALDH18A1, B4GALT3, ZDHHC5	C7	IMMUNESIGDB	Genes down-regulated in CD4 [GeneID=920] T helper cells Th17 treated with TGFB1 and IL6 [GeneID=7040;3569]: 1h versus 42h.
GNF2_TNFSF10	0.000198886	0.00799405	0.518848	-0.566092	-2.14418	29	SECTM1, PLXNC1, ARRB2, HCK, S100A4, LST1, AIF1, MYO1F, SPI1, FCGR2A, MNDA, CSF3R, DPEP2, CCR1, SDCBP, CLEC7A, PILRA, NCF2, RGS2, EVI2B, TLR1, FPR1	C4	CGN	Neighborhood of TNFSF10
KEGG_VIBRIO_CHOLERAE_INFECTION	0.000205201	0.00822246	0.518848	-0.465708	-1.98565	47	ATP6V1D, ATP6V1H, KDELR3, KDELR2, SEC61A2, ATP6V1B2, ACTB, PRKACA, ACTG1, PDIA4, SEC61G, ERO1A, ATP6V1A, PLCG2, ATP6V1F, ARF1, GNAS, TCIRG1, KCNQ1, KDELR1, ATP6V1C2, SEC61B, SEC61A1	C2	CP:KEGG	Vibrio cholerae infection
KEGG_DILATED_CARDIOMYOPATHY	0.000205204	0.00822246	0.518848	-0.392811	-1.87297	77	ITGA5, TPM2, TPM4, CACNA2D4, DES, MYH7, SGCA, ADCY7, PLN, CACNB4, ACTB, PRKACA, LAMA2, SGCG, ACTG1, ATP2A2, TPM1, CACNG8, ACTC1, ITGA3, CACNB1, TNNC1, ITGB3, GNAS, ITGA10, CACNA1C, ADCY4, ITGA4, TGFB1, ITGA8	C2	CP:KEGG	Dilated cardiomyopathy
CROMER_TUMORIGENESIS_UP	0.000208301	0.00833363	0.518848	-0.486312	-2.05826	45	NELL2, COL1A2, COL3A1, LAMC2, PTK7, FN1, PLAU, PDPN, OASL, COL4A2, SLC2A3, MYO1B, UCHL1, CCL3, LUM, PXDN, ACTN1, POSTN, COL11A1, SERPINE1, ODC1, CXCL8, PLOD3, SPARC, TNC, IL6, BMP1, CHST2	C2	CGP	Tumorigenesis markers of head and neck squamous cell carcinoma (HNSCC): up-regulated in the 'early' tumors vs normal samples.
GAURNIER_PSMD4_TARGETS	0.000209078	0.00835182	0.518848	-0.466544	-2.03217	51	HLA-DQA1, HLA-DQB1, HLA-DRB5, HLA-DRB1, CCL19, IL10, C2, HLA-DRA, IL12RB1, C3AR1, CCR5, CCL5, HLA-B, CCL3, HLA-A, IL18R1, IL16, HLA-E, C3, CCR1, HLA-DMB, CD86, IL17RA, HLA-DOA, TGFB1, B2M, HLA-F, CXCL8, CXCL2, IL21R, IL6, TGFBR1	C2	CGP	Inflammatory cytokines, chemokines and their cognate receptors up-regulated in THP-1 cells (monocyte) after treatment with PSMD4 [GeneID=5710].
SNF5_DN.V1_DN	0.000211038	0.00841713	0.518848	-0.346648	-1.78399	119	CTH, FRZB, DSP, P2RX5, PRKG2, FBLIM1, DES, PKP2, PPBP, TNFRSF21, C1QTNF1, CACNB4, NNMT, NPR3, CARD10, MAPK13, PCOLCE2, CSGALNACT1, VNN1, RFX3, UCHL1, NFKBIZ, FOXD1, SNCA, KIRREL1, ITGA3, RRAD, CHODL, DSG2, GPX3, NPR1, TMEM176B, SLC16A3, RAB3GAP2, KCNAB1, TMEM176A, TINAGL1, ATP8A2, MGST2, MCUB, RCAN2, STAR, CRMP1, RIMKLB, KNG1, PAPPA, GABRB1, FADS3, FABP4, LY75, PKP1, NSG1, TNNT2	C6		Genes down-regulated in MEF cells (embryonic fibroblasts) with knockout of SNF5 [Gene ID=6598] gene.
GSE26488_WT_VS_HDAC7_DELTAP_TG_OT2_THYMOCYTE_WITH_PEPTIDE_INJECTION_UP	0.000212202	0.00845055	0.518848	-0.319724	-1.73703	162	AP3S1, FRZB, MATN3, GLRX, POMC, COL6A3, RAB8B, PLA2R1, SLC6A13, ORMDL1, PDLIM7, PAQR7, HCN1, PNOC, ALOX15B, NUDT4, MAP2K6, STK10, IL12RB1, SEPHS2, RAB3IL1, NMU, CCR5, SGCG, CSF3R, HLA-A, ICAM5, GREM2, IKBKE, ETF1, VOPP1, RAB11A, HK2, PCBD1, USP15, TNNC1, LPL, ATP1B1, EPS8, CBX4, ENO2, SULT1B1, EIF6, PTGR1, C1QB, HLA-DOA, CLTC, RPS6KA1, ACLY, KLC4, IRF5, CTSZ, SLC12A1, CDK14, LARP4B, S100A3, USP18…	C7	IMMUNESIGDB	Genes up-regulated in dobule positive thymocytefrom OT-2 transgenic mice injected with agonist peptide: wildtype versus expressing deltaP form of HDAC7 [GeneID=51564].
GOBP_MONOCYTE_CHEMOTAXIS	0.000213048	0.00846562	0.518848	-0.507366	-2.10927	42	LGMN, CCL19, ANXA1, CCN3, AIF1, DUSP1, CCL5, CCL4, FOLR2, CCL3, CXCL12, MSMP, CCR1, S100A12, PDGFB, CX3CL1, LYN, SERPINE1, SLIT2, SLAMF8, PTPRO, CCL3L3, PLA2G7, CCL21, IL6, IL6R, FPR2	C5	GO:BP	The movement of a monocyte in response to an external stimulus. [GOC:add, PMID:11696603, PMID:15173832]
BASSO_CD40_SIGNALING_UP	0.000213235	0.00846562	0.518848	-0.38977	-1.90854	90	HLA-DQA1, HLA-DQB1, HLA-DRB1, PLXNC1, PLEK, GADD45B, TNFAIP8, IFI30, KCNN4, STK10, PHACTR1, TNFAIP2, LAPTM5, IER3, CCL4, CCL3, RGS1, BATF, CD74, NCKAP1L, PTPRE, ADAM8, VOPP1, ZFP36L1, HTR3A, MAP3K8, LHFPL2, LYN, BCL2A1, LGALS1, ARID5B, GPR183, JUNB, NCF2, CD83, SRGN, RAC2, TRIP10, IRF5, SIK1, HSP90B1, STAT1, HLA-F, CD40	C2	CGP	Gene up-regulated by CD40 [GeneID=958] signaling in Ramos cells (EBV negative Burkitt lymphoma).
TRAVAGLINI_LUNG_PLASMACYTOID_DENDRITIC_CELL	0.000213866	0.00847766	0.518848	-0.371807	-1.83268	94	SERPINF1, TPM2, APP, TSPAN13, TP53I11, GPX1, LGMN, NRP1, TGFBI, TNFRSF21, DAB2, LTK, PLD4, GAS6, SYK, THBD, RNASET2, PLXNA4, CD4, TBC1D8, IRF8, CSF2RB, SEL1L3, BMF, SLC20A1, EPHA2, C12orf75, CUX2, GPR183, DUSP5, RRBP1, AEBP1, RNASE6, TAMALIN	C8
HESS_TARGETS_OF_HOXA9_AND_MEIS1_DN	0.000215756	0.0085395	0.518848	-0.401793	-1.91618	78	TRPV2, ARG2, CTSV, ANXA1, TGFBI, FCGR1A, GCNT2, PLEK, CCN3, MS4A6A, AQP9, DAB2, MRC1, CD300LF, HCK, BTG2, S100A4, C3AR1, IL18, CCR5, DUSP1, CSF1R, TPD52, ZFP36L1, CSF2RB, CLEC7A, LPL, CAMK2D, LSP1, MYADM, LILRB4, FGR, PLSCR1, FOS, SLC11A1, MPEG1, GRK5, FPR1, MSR1, ZFP36, LIPA, EGR1, STX3, IL1R2, FPR2, UPP1	C2	CGP	Genes down-regulated in hematopoietic precursor cells conditionally expressing HOXA9 and MEIS1 [GeneID=3205;4211].
REACTOME_TNFR2_NON_CANONICAL_NF_KB_PATHWAY	0.000216269	0.00854675	0.518848	-0.391259	-1.89148	84	PSMD4, TNFSF8, PSMA7, PSMD13, PSMD1, MAP3K14, PSMB3, LTBR, UBC, TNFRSF1B, TRAF2, TNFRSF1A, SKP1, CD27, CUL1, TNFSF18, PSMD8, TNFRSF12A, PSMA1, PSME3, PSMA6, PSMC4, PSMD12, TNFRSF17, PSMD3, TNFRSF13C, PSMD2, PSMB7, PSMC6, BTRC, PSMB4, PSMC1, TNFRSF14, CD40, PSMB5, PSMD14	C2	CP:REACTOME	TNFR2 non-canonical NF-kB pathway
AP1_C	0.00022074	0.00871012	0.518848	-0.285104	-1.63074	236	SKIDA1, PEA15, ULK1, LRRN4CL, MARK1, C19orf33, ROCK2, LYVE1, NTN4, RAB3D, LPP, LAMC2, TRAPPC3, VCL, LAMC1, WNT6, PROCR, PSMD1, CLIC1, CSF3, IL10, SV2B, EFNA1, ZFYVE9, MAMDC2, GRIA1, VAT1, FAM81A, BLMH, LAPTM5, ATP6V1B2, MARK4, PPP2CA, CD68, LYSMD2, MDFI, HSPB7, RNF144B, AIG1, SEC24D, AP2M1, FERMT3, VIT, PPP1R15A, FSTL1, ABCF3, SDCBP, PTPRR, FBXO2, EPHA2, ATP1B1, PDGFRB, C15orf39, PHLDA2, GABARAPL…	C3	TFT:TFT_Legacy	Genes having at least one occurrence of the motif NTGASTCAG in the regions spanning 4 kb centered on their transcription starting sites [-2kb, +2kb]. This matches the JUN [GeneSymbol=JUN] transcription factor binding site V$AP1_C (v7.4 TRANSFAC).
REACTOME_TRANSMISSION_ACROSS_CHEMICAL_SYNAPSES	0.000227039	0.00894507	0.518848	-0.28457	-1.6201	228	GABRA2, PRKAB1, SLC32A1, APBA1, CREB1, STX1A, DLG4, SLC38A1, GABRB2, KPNA2, PRKAR1A, RAB3A, ARL6IP5, SLC6A13, ERBB4, ADCY7, TUBB6, PPM1E, CACNB4, AKAP5, GRIA1, GNAI2, TUBA1C, PRKACA, GNB5, PLCB2, NSF, GRIA4, CHRNA6, GNG10, AP2S1, CHRNA7, CACNG8, SNAP25, KCNJ12, TUBB4B, PRKAR2A, AP2M1, DLG2, MAPK3, CHRNE, PRKAG2, CALM1, AP2B1, CACNB1, TUBA8, GAD1, CACNA1E, GNG2, CHRNA1, HTR3A, CAMK2D, KRAS, CAMK2B…	C2	CP:REACTOME	Transmission across Chemical Synapses
GOBP_NEUTROPHIL_CHEMOTAXIS	0.000228252	0.0089792	0.518848	-0.417119	-1.96106	72	PIK3CG, PPIB, MCU, PPBP, CCL19, PIKFYVE, CAMK1D, JAML, DPP4, VAV1, C3AR1, CCL5, SYK, CCL4, GBF1, CSF3R, SAA1, CCL3, CD74, NCKAP1L, S100A12, CX3CL1, FCER1G, MDK, CXCL5, RAC2, RIPOR2, CXCR1, SLIT2, CXCR2, CCL3L3, CXCL8, TREM1, CCL21, CXCL2, S100A8, EDN3	C5	GO:BP	The directed movement of a neutrophil cell, the most numerous polymorphonuclear leukocyte found in the blood, in response to an external stimulus, usually an infection or wounding. [GOC:jl, ISBN:0198506732]
GSE43955_TH0_VS_TGFB_IL6_TH17_ACT_CD4_TCELL_4H_UP	0.000229221	0.00900361	0.518848	-0.312808	-1.72161	177	MRPL37, POLR1C, ADSS2, SPHK1, SOCS3, FKBP9, RPP21, WDR82, FBXO21, ADAMTS1, RNF149, TGFBI, FCGR1A, PROCR, SELE, NNMT, FGL2, PTDSS1, DKK3, BTG1, TARS2, CEBPD, CYRIB, SGCG, RHOH, NADK, CCL4, THBD, PTPN6, PTGER4, CSF3R, SAA1, HFE, TSPAN5, C5orf34, ZNF436, ACTN1, PPP1R15A, POSTN, PAG1, HK2, IL1R1, CD86, GALNT11, B4GALT3, IRF1, MAP3K8, ADGRG3, GPR132, PTGS2, EIF6, LYN, RPP14, MAP2K1, JUNB, GSDME, NFIL3…	C7	IMMUNESIGDB	Genes up-regulated in CD4 [GeneID=920] T helper cells (4h): Th0 versus TGFB1 and IL6 [GeneID=7040;3569].
BOYLAN_MULTIPLE_MYELOMA_C_D_DN	0.000229746	0.00901056	0.518848	-0.284595	-1.62033	231	RMDN2, SLPI, SLC16A5, STAT4, DSP, IRF6, ABI3BP, EPCAM, APP, LILRB5, RAB3D, F13A1, ISG20, TGFBI, RGS18, IQGAP2, PLEK, PLCB4, PIK3CB, KDELR3, FGL2, FYB1, SERPINA3, ITPRIPL2, GDA, MYO1F, ANXA2, SCAMP1, CCL5, TRIM5, GPR160, RAPH1, ITGAL, IL18R1, CASP4, HLA-E, C3, OLFM4, SEC24D, TBC1D8, BASP1, KIAA1217, SEMA4F, TENT5C, OXR1, PTPRE, ARSG, DHRS3, RRAS2, LY6H, FOSL2, MCEMP1, F2R, DSG2, TMEM176B, BSCL2, M…	C2	CGP	Genes down-regulated both in group C and D of tumors arising from overexpression of BCL2L1 and MYC [GeneID=598;4609] in plasma cells.
GOBP_HUMORAL_IMMUNE_RESPONSE	0.000230273	0.00901759	0.518848	-0.332154	-1.76836	140	HLA-DQB1, SLPI, MFAP4, GNLY, FCGR2B, C1S, CFB, PPBP, HLA-DRB1, SERPING1, TNFRSF21, C1R, C2, C7, DEFB1, BLNK, WFDC3, CFD, CLU, H2BC12, CFH, H2BC11, C1RL, PTPRC, POU2F2, PTPN6, ST6GAL1, H2BC10, HLA-A, HLA-E, C3, S100A12, H2BC6, H2BC4, BCL3, KLK7, ALOX5, C1QA, C1QC, RARRES2, EBI3, ZP3, C1QB, GAPDH, GPR183, CXCL5, CD83, JCHAIN, TREM2, RNASE6, SLC11A1, KLK5, CD59, CFI, CXCL8, A2M	C5	GO:BP	An immune response mediated through a body fluid. [GOC:hb, ISBN:0198506732]
REACTOME_MEIOSIS	0.000231305	0.0090443	0.518848	0.393354	1.83604	103	H2AC4, H3C3, H2BC3, H4C2, H2BC9, H2BC7, H3C7, H3C2, SUN1, H2AX, TERF1, H2BC17, H2AC14, H4C13, H3C8, SYCP2, H3C11, H4C14, RBBP8, BRCA1, SUN2, HSPA2	C2	CP:REACTOME	Meiosis
REACTOME_DNA_METHYLATION	0.000234246	0.00914	0.518848	0.476235	1.99636	57	H2AC4, H3C3, H2BC3, H4C2, H2BC9, H2BC7, H3C7, H3C2, H2AX, H2BC17, H2AC14, H4C13, H3C8, H3C11, H4C14	C2	CP:REACTOME	DNA methylation
GSE42021_TCONV_PLN_VS_TREG_PRECURSORS_THYMUS_DN	0.000234459	0.00914	0.518848	-0.309675	-1.70752	180	SSX2IP, SOCS3, FCGR2B, PBRM1, CEBPB, RNF149, RNF19B, VCL, PROCR, KDELR3, TES, IL10, PDPN, G3BP1, SRSF10, MYC, CPD, TNFAIP2, UTP4, CEBPD, SCAMP1, DUSP1, NUPR1, CD53, IL1RN, NFKBIZ, LCP2, HERPUD1, ATP13A3, LTBP1, CDKN1A, CSNK1A1, HK2, BCL3, PSMA6, CTPS1, APAF1, SH3GL1, FNDC3A, TOP1, B4GALT3, UBE2D3, HSPA5, MAP3K8, GCH1, SLC31A1, PTGS2, EIF6, CD14, PIM1, BCL2A1, MYADM, JUNB, SERTAD1, LDAF1, SRGN, GP…	C7	IMMUNESIGDB	Genes down-regulated in T conv from: peripheral lymph nodes versus thymic precursors.
HALLMARK_INFLAMMATORY_RESPONSE	0.000237098	0.00921522	0.518848	-0.315317	-1.73162	173	ITGA5, SPHK1, MARCO, PIK3R5, GNA15, PVR, VIP, AQP9, SELE, OPRK1, CSF3, IL10, PDPN, MYC, BTG2, C3AR1, TNFRSF1B, IL18, MEFV, CCL5, ATP2A2, STAB1, IFNGR2, KLF6, PTGER4, CSF3R, SLC7A2, IL18R1, CCRL2, RGS1, ADGRE1, RNF144B, LY6E, LCP2, IFITM1, ATP2B1, APLNR, CDKN1A, PTPRE, CD48, CX3CL1, P2RX4, KCNMB2, IL1R1, EMP3, ITGB3, IRF1, HRH1, GCH1, GPR132, SLC31A1, TPBG, LYN, CD14, EBI3, PTAFR, GPR183, INHBA, L…	H		Genes defining inflammatory response.
REACTOME_MHC_CLASS_II_ANTIGEN_PRESENTATION	0.000237168	0.00921522	0.518848	-0.354867	-1.79449	108	HLA-DQA1, HLA-DQB1, CTSV, HLA-DRB5, CTSB, KIF2C, CAPZB, LGMN, HLA-DRB1, TUBB6, CTSA, IFI30, HLA-DOB, CTSK, HLA-DRA, TUBA1C, SEC13, AP1G1, KIF3C, KLC2, AP2S1, TUBB4B, CD74, SEC24D, KIFAP3, AP2M1, AP2B1, TUBA8, HLA-DMB, ARF1, CTSC, AP1S1, HLA-DOA, CLTC, CTSD, CTSH, KLC4, SEC31A, TUBB2B	C2	CP:REACTOME	MHC class II antigen presentation
BOQUEST_STEM_CELL_DN	0.000237456	0.00921522	0.518848	-0.29902	-1.67792	202	PLVAP, HLA-DQA1, HLA-DQB1, LHX6, ALDH1A2, TSPAN13, KDR, CDK1, CCDC68, HLA-DRB1, ISG20, NLK, CDC42EP3, TBC1D9, SSH1, SELE, CSF3, CARD10, EFNA1, HLA-DRA, SEMA3F, PTPRM, LAPTM5, RASA4, TNFRSF1B, F11R, GFOD1, HLA-B, THBD, ST6GAL1, STX11, IL18R1, ZNF385D, MMRN2, CCRL2, CD74, LPAR6, TBC1D30, LCP2, SMAGP, APLNR, PTPRE, PODXL, CX3CL1, TPD52, CSF2RB, CLDN5, DSG2, TM4SF1, GMFG, TGM2, PRKCH, ADRB2, PECAM1, …	C2	CGP	Genes down-regulated in freshly isolated CD31- [GeneID=5175] (stromal stem cells from adipose tissue) versus the CD31+ (non-stem) counterparts.
LEIN_NEURON_MARKERS	0.000239946	0.0092979	0.518848	-0.432124	-1.95843	61	NDFIP1, NSG2, RAB6A, PRKACA, GRIA4, MYO5A, UCHL1, SNAP25, CHN1, NAPB, PHF24, CX3CL1, YWHAG, GABARAPL1, TCAF1, CLSTN3, CAMK2B, MAP2K1, GPR162, SYT1, CYFIP2, GRIN2B, MAP2K4, NEFL, CHGB, GAP43, EGR1, RTN1, TRANK1, PRKAR1B, ADD2, PTPRN, CYRIA, NDRG4, UNC80, LRP11, SYNGR3, BMERB1, GRIA2, CHST1	C2	CGP	Genes enriched in neurons in the adult mouse brain identified through correlation-based searches seeded with neuron cell-type specific gene expression patterns.
GSE29618_BCELL_VS_MDC_DAY7_FLU_VACCINE_DN	0.000240599	0.00930926	0.518848	-0.305526	-1.69047	185	PEA15, NDFIP1, PAK1, GPX1, ANXA1, GRN, EIF4A1, VCL, TGFBI, GNA15, TMEM43, APOBR, ALDOA, NIBAN1, TUBA1C, S100A4, TNFAIP2, CST7, RGS10, LST1, CD302, AIF1, CEBPD, IL18, ACTB, TBXAS1, PLCB2, ACTG1, AP2S1, S100A10, RCOR1, TYROBP, PGM1, CSF1R, IL1RN, LGALS9, AOAH, CD4, MYL6, PKM, FLT3, ACTN1, CHP1, PTMS, PPT1, HEXB, PTPRE, CASP1, ADAM8, LIMS1, CLEC7A, KCTD12, COTL1, CD86, CTBP2, APAF1, TPI1, FCER1G, FC…	C7	IMMUNESIGDB	Genes down-regulated in comparison of B cells from influenza vaccinee at day 7 post-vaccination versus myeloid dendritic cells (mDC) at day 7 post-vaccination.
GSE21927_HEALTHY_VS_TUMOROUS_BALBC_MOUSE_MONOCYTE_DN	0.000243235	0.00939723	0.518848	-0.360208	-1.82465	109	ZNF547, STYK1, SPHKAP, IGFL2, CREB1, FOXC2, DNAJC16, NT5C1A, ADAMTS1, CALHM1, VAMP8, EIF4A1, SERINC3, GALNT17, NNMT, FGL2, SLC22A3, CES3, GARS1, TENM4, CRHR2, PGF, MAP1B, KBTBD12, CDH6, SCGN, DPEP2, PCP4, CRYBG1, WBP2NL, PRICKLE1	C7	IMMUNESIGDB	Genes down-regulated in CD11b+ cells from spleen of BALB/c mice: healthy versus bearing C26GM colon carcinoma.
GOBP_REGULATION_OF_CELL_SUBSTRATE_ADHESION	0.000244111	0.00941701	0.518848	-0.307212	-1.70459	188	CCL28, COL1A1, PLEKHA2, ITGA5, COL8A1, ABI3BP, ROCK2, PHLDB2, KDR, FBLN2, NRP1, THBS1, VCL, POLDIP2, RCC2, GCNT2, JAG1, FN1, DAB2, PIK3CB, PLAU, PDPN, ARPC2, VEGFA, GBP1, FBLN1, ACTG1, APOD, S100A10, MEN1, ST6GAL1, EGFLAM, UNC13D, GFUS, CCN1, FOXF1, OLFM4, VIT, ITGA3, PDGFB, RAC3, CX3CL1, RRAS, LIMS1, CALR, CCDC80, MDK, CD3E, PTEN, MYADM, FUT1, SLC9A1, LDB1, AJAP1, P4HB, EMP2, RREB1, RAC2, SERPIN…	C5	GO:BP	Any process that modulates the frequency, rate or extent of cell-substrate adhesion. Cell-substrate adhesion is the attachment of a cell to the underlying substrate via adhesion molecules. [GOC:dph, GOC:pf, GOC:tb]
RGAGGAARY_PU1_Q6	0.000244948	0.00943523	0.498493	-0.24082	-1.4826	447	PAX8, PLVAP, TRPV2, PIK3CG, SSBP4, NDFIP1, HYAL3, EIF4EBP1, DOP1A, ABI3, TPM2, MATN3, MGAT4C, WNT3, DCAF1, SRP72, IL17RE, YRDC, ELOVL6, CDV3, TMEM59L, CCDC68, SYT7, NRP1, PSD3, MR1, CDC5L, NAA80, PLXNC1, PTK7, ELN, VIP, PPP1R14C, WNT6, CTSA, CAMK1D, CLIC1, CSF3, APOBR, EFNA1, VAV1, PI4K2A, DLAT, MTPN, ALDOA, E2F3, EFNB3, FAM81A, SLC9B2, CNOT6L, YWHAZ, LRRFIP1, PLCB2, SIPA1, GAL3ST3, ANKRD28, GPAT…	C3	TFT:TFT_Legacy	Genes having at least one occurrence of the highly conserved motif M50 RGAGGAARY in the regions spanning 4 kb centered on their transcription starting sites [-2kb, +2kb]. This matches the SPI1 [GeneSymbol=SPI1] transcription factor binding site V$PU1_Q6 (v7.4 TRANSFAC).
REACTOME_ACTIVATED_PKN1_STIMULATES_TRANSCRIPTION_OF_AR_ANDROGEN_RECEPTOR_REGULATED_GENES_KLK2_AND_KLK3	0.00024549	0.00944206	0.498493	0.475673	1.994	57	H2AC4, H3C3, H2BC3, H4C2, H2BC9, H2BC7, H3C7, H3C2, H2AX, H2BC17, H2AC14, H4C13, H3C8, H3C11, H4C14	C2	CP:REACTOME	Activated PKN1 stimulates transcription of AR (androgen receptor) regulated genes KLK2 and KLK3
GNF2_SPI1	0.000246544	0.00946854	0.498493	-0.537592	-2.08801	32	PPBP, SECTM1, PLXNC1, AQP9, ARRB2, HCK, LST1, MYO1F, SPI1, NADK, FCGR2A, MNDA, CSF3R, CLEC7A, PILRA, NCF2, VASP, TLR1, MSRB1, FPR1	C4	CGN	Neighborhood of SPI1
GSE21546_UNSTIM_VS_ANTI_CD3_STIM_DP_THYMOCYTES_UP	0.000247482	0.00948531	0.498493	-0.308431	-1.68557	169	SLC47A1, LSAMP, SRSF12, TAGLN, THAP8, OTUD1, CYP26B1, RAB27B, ARL6IP5, THBS1, ATP2B4, PLEKHM3, FN1, DAAM1, H3C6, ZNF671, OLFML3, DKK2, ATRN, AJUBA, KRT18, MKRN1, RAB6A, HSBP1L1, CYP26A1, CEBPD, ANXA2, DUSP1, SCYL2, MYO5A, NPC2, CCN1, KCTD10, NAPB, KIFAP3, PGM2L1, SUSD6, FSTL1, LTBP1, FNDC5, CCN2, CADPS, ZNF177, SAMD9L, CEMIP2, RND3, ELMOD1, LRP12, CAVIN1, PRKCH, LHFPL2, MYADM, RAB15, WDR11, EHD3,…	C7	IMMUNESIGDB	Genes up-regulated in double positive thymocytes: untreated versus stimulated by anti-CD3.
GSE9988_LOW_LPS_VS_CTRL_TREATED_MONOCYTE_UP	0.000247714	0.00948531	0.498493	-0.313932	-1.70294	159	TLNRD1, SOCS3, OTUD1, YRDC, CDK1, TXN, PLEK, GADD45B, AQP9, CSF3, IL10, NR4A3, PLK3, BTG2, NEDD4L, B3GNT2, RHCG, IL18, PLEKHF2, NBN, DUSP1, GBP1, C11orf96, JUN, IER3, RHOH, CCL4, PTGER4, GRAMD1A, CCRL2, RGS1, SOD2, NFKBIZ, SUSD6, PPP1R15A, TPD52, CASP5, GBP2, PHLDA2, MAP3K8, PTX3, GCH1, DYRK3, PTGS2, NOCT, BCL2A1, HES1, CXCL5, INHBA, CD83, ETS2, NLRP3, DUSP5, GADD45A, TRIP10, ANO5, FOSL1, EGR3, C…	C7	IMMUNESIGDB	Genes up-regulated in comparison of monocytes treated with 1 ng/ml LPS (TLR4 agonist) versus monocytes treated with control IgG.
GOMF_EXTRACELLULAR_MATRIX_BINDING	0.000248182	0.0094892	0.498493	-0.462731	-2.00213	50	PLEKHA2, OLFML2A, ADAMTS15, FBLN2, NTN4, THBS1, TGFBI, DCN, VTN, ELN, ECM1, VEGFA, SMOC2, ADGRG6, CCN1, ITGA3, SSC5D, ITGB3, OLFML2B, LGALS1, TINAGL1, COL11A1, ADAMTS5	C5	GO:MF	Binding to a component of the extracellular matrix. [GOC:ai]
GOBP_REGULATION_OF_MONONUCLEAR_CELL_MIGRATION	0.000249865	0.00953945	0.498493	-0.368387	-1.81303	93	CD47, MADCAM1, APP, LGMN, THBS1, CCN3, MIA3, ECM1, GAS6, STK10, IL27RA, C3AR1, AIF1, DUSP1, CCL5, SPI1, APOD, CCL4, PDGFD, CCL3, CSF1R, LGALS9, CXCL12, CD200R1, MAPK3, CCR1, ADAM8, WNT5A, CALR, RARRES2, DOCK8, MDK, LYN, IL34, RIPOR2, ITGA4, SERPINE1, SLIT2, TNFRSF14, SLAMF8, PYCARD, PLA2G7, JAM2, AGER, CCL21	C5	GO:BP	Any process that modulates the rate, frequency or extent of mononuclear cell migration. Mononuclear cell migration is the movement of a mononuclear cell within or between different tissues and organs of the body. [GOC:mah]
GOBP_ION_TRANSMEMBRANE_TRANSPORT	0.000250708	0.00955756	0.498493	-0.208662	-1.36506	880	ORAI1, KCNV1, GABRA2, PRNP, SLC26A8, SLC39A10, TRPV2, KCNN1, PIK3CG, SLC25A42, SLC47A1, MPC2, SLC6A20, XPR1, SLC24A3, SLC13A4, DLG4, KCNH5, COX6B1, SLC19A1, P2RX5, ATP10D, FXYD7, GJC1, SLC16A12, CEMIP, GABRB2, SLC16A11, APP, GLRX, RYR3, SLC22A8, OSR1, TMEM150C, CACNA2D4, TSPAN13, CASQ2, SCARA5, SLC47A2, FXYD6, MCU, SLC12A8, SLC22A6, HPCA, ARL6IP5, CCL19, GPR35, CALHM1, ANO1, OPRM1, SLC6A13, SLC9A…	C5	GO:BP	A process in which an ion is transported across a membrane. [GOC:mah]
GOBP_NEGATIVE_REGULATION_OF_IMMUNE_SYSTEM_PROCESS	0.000253039	0.00963221	0.498493	-0.259345	-1.54522	327	CCL28, CD47, GPS2, TAPBPL, PRNP, ARG2, NDFIP1, FCGR2B, COL3A1, PRKAR1A, PPP3CB, GPX1, HLA-DRB1, SERPING1, CEBPB, THBS1, ANXA1, GRN, TNFRSF21, STAT6, CCN3, CNR1, MIA3, ARRB2, IL10, HLA-DOB, BMP4, FGL2, CD300LF, DPP4, CD300A, HCK, MYC, RUNX1, IL27RA, CST7, LST1, MICA, LAPTM5, RHBDF2, DUSP1, GBP1, SPI1, CD68, APOD, SYK, HLA-B, PTPRC, PTPN6, PTGER4, MNDA, TYROBP, CCL3, HLA-A, LGALS9, CXCL12, CD200R1,…	C5	GO:BP	Any process that stops, prevents, or reduces the frequency, rate, or extent of an immune system process. [GOC:add]
GSE26727_WT_VS_KLF2_KO_LPS_STIM_MACROPHAGE_DN	0.000253936	0.00964104	0.498493	-0.308845	-1.70394	182	PRNP, CAND1, ARG2, CYP1B1, HOPX, POP4, SUCLA2, CDC42EP3, MATK, DAAM1, MAP2K3, CLIC1, DUSP14, HNRNPF, VDAC1, RGS10, TNFRSF1B, SACS, MBNL1, LRRFIP1, GEM, PPP2CA, TNFRSF1A, ACTG1, WBP1L, IER3, S100A11, CCT5, CCL4, ZNRD2, TUBB4B, LPCAT1, SLC5A3, PKM, ATP2B1, SUB1, RRAS2, PGAM1, CSTB, SERPINE2, CHMP1A, NSMAF, HNRNPA0, CHSY1, ATP1B3, BCL2A1, PAQR3, SPRY1, FEM1B, EIF4A3, TRA2B, TP53BP1, NLRP3, COX17, DU…	C7	IMMUNESIGDB	Genes down-regulated in peritoneal macrophages treated with LPS: wildtype versus KLF2 [GeneID=10365] knockout.
GSE17721_LPS_VS_POLYIC_8H_BMDC_UP	0.000254015	0.00964104	0.498493	-0.306427	-1.6884	181	PSMD4, WDR75, IMPACT, DCAF1, HRK, KIAA0319L, IGFBP4, ANXA1, EIF3I, RBM18, EHBP1L1, MLLT11, HMGCS1, NUP50, LMO4, CCT6A, SEPHS2, MED8, DDX24, KIF3C, SKP1, S100A11, FCGR2A, POLR2K, CUL1, ITGAL, ACAD9, GRAMD1A, SOD2, ARHGAP35, ST7, ATP13A3, PDIA6, ARPC3, SLC6A17, HMOX1, RAB11A, GPR155, TFPI, KYAT3, FCER1G, RND3, SERPINE2, PSMD12, ABCC1, TIMM23, NCKAP1, EIF6, DDX54, TP53BP1, RAC2, ELP5, AZIN1, RABGEF1…	C7	IMMUNESIGDB	Genes up-regulated in comparison of dendritic cells (DC) stimulated with LPS (TLR4 agonist) at 8 h versus DC cells stimulated with poly(I:C) (TLR3 agonist) at 8 h.
TRAVAGLINI_LUNG_MYOFIBROBLAST_CELL	0.000255495	0.00968301	0.498493	-0.441072	-1.96651	57	COL1A1, LTBP2, COL3A1, CCDC68, TGFBI, DKK3, COL12A1, CLU, CFH, GEM, CTHRC1, THBD, S100A10, MMP2, LXN, TYRP1, TNFRSF19, RARRES1, PRELP, CCN2, POSTN, WNT5A, ATP1B1, ROBO2, PKIG, ENC1	C8
HP_ABNORMAL_ORAL_MUCOSA_MORPHOLOGY	0.000257881	0.00975912	0.498493	-0.275957	-1.60646	265	ORAI1, HLA-DQA1, HLA-DQB1, STAT4, STX1A, WRAP53, DSP, ADAMTS2, PRMT7, FZD2, COL3A1, C1S, MMACHC, ABCA5, PRKAR1A, PLAGL1, F13A1, LAMC2, PIGS, F10, ELN, MIA3, C1R, KCNH1, GJB2, IL10, ECM1, ABCC6, FAM20A, HPS1, ATP6V1B2, NCF1, MEFV, PRKDC, RHOH, ROR2, CD27, KCNK4, SYK, HLA-B, MAP1B, PTPRC, FAS, MEN1, MMP2, SAA1, USB1, NABP1, IL1RN, LAT2, OSTM1, ADA2, CCR1, CDKN1A, PRKCD, EMC1, SAMD9, WNT5A, DHCR7, G…	C5	HPO	Abnormal oral mucosa morphology
GAUCHER_PBMC_YF_VAX_STAMARIL_UNKNOWN_AGE_60DY_UP	0.00026037	0.00983894	0.498493	-0.471007	-2.00184	46	TMEM268, EPB41L3, IFI30, SUSD1, KCNMB1, NAGK, LGALS9, NPC2, CD74, ADA2, ADAP2, RTCB, HK2, TTYH3, CD86, BLVRA, MYOF, LHFPL2, SMCO4, HAVCR2, EMILIN2, KYNU, NAGA, SLC37A2, NLRP3, SIL1, ANKRD22, WARS1	C7	VAX	Genes up-regulated in peripheral blood mononuclear cell 60d vs 0d in unknown after exposure to YF-Vax/Stamaril , time point 60D
REACTOME_B_WICH_COMPLEX_POSITIVELY_REGULATES_RRNA_EXPRESSION	0.000264299	0.00995389	0.498493	0.406618	1.83311	84	H2AC4, H3C3, H2BC3, H4C2, H2BC9, H2BC7, H3C7, H3C2, ERCC6, H2AX, H2BC17, H2AC14, H4C13, SMARCA5, H3C8, TBP, H3C11, H4C14, POLR1A, DEK	C2	CP:REACTOME	B-WICH complex positively regulates rRNA expression
GSE26343_UNSTIM_VS_LPS_STIM_NFAT5_KO_MACROPHAGE_DN	0.000265229	0.00995389	0.498493	-0.30672	-1.68864	178	ARG2, ITGA5, SOCS3, HTR7, KDR, CEBPB, LAMC2, PIK3R5, TAGAP, GADD45B, NR4A3, HCK, BTG2, UAP1, TNFAIP2, DUSP1, SKIL, IER3, HLA-B, FAS, DAPP1, PTGER4, SAA1, IL1RN, CCRL2, SOD2, GLIPR1, CASP4, NFKBIZ, SAMSN1, SLC5A3, HERPUD1, IL4I1, CDKN1A, UBE2F, PLK2, PDGFB, CX3CL1, PNRC1, RRAD, ZFP36L1, CSF2RB, ZNF516, BCL3, CD86, IRF1, MAP3K8, GCH1, GPR132, EIF6, CD14, PIM1, BCL2A1, FGR, RAB20, JUNB, ATF7, CD83, …	C7	IMMUNESIGDB	Genes down-regulated in bone marrow-derived macrophages with NFAT5 [GeneID=10725] knockout: control versus stimulated with LPS.
GOBP_ANTIGEN_PROCESSING_AND_PRESENTATION_OF_PEPTIDE_OR_POLYSACCHARIDE_ANTIGEN_VIA_MHC_CLASS_II	0.000265342	0.00995389	0.498493	-0.542295	-2.09001	31	HLA-DQA1, HLA-DQB1, CTSV, HLA-DRB5, FCGR2B, LGMN, HLA-DRB1, THBS1, PIKFYVE, IFI30, HLA-DOB, HLA-DRA, ARL8B, CD74, HLA-DMB, FCER1G, HLA-DOA, CTSD, TREM2, PYCARD, B2M	C5	GO:BP	The process in which an antigen-presenting cell expresses antigen (peptide or polysaccharide) on its cell surface in association with an MHC class II protein complex. [GOC:add, ISBN:0781735149, PMID:15531770, PMID:15771591, PMID:16153240]
BLANCO_MELO_COVID19_BRONCHIAL_EPITHELIAL_CELLS_SARS_COV_2_INFECTION_UP	0.000265472	0.00995389	0.498493	-0.354715	-1.80054	111	PARP12, COL8A1, SOCS3, C1S, CFB, C1QTNF1, C1R, IL32, CSF3, EFNA1, TUBA1C, TNFAIP2, RHCG, CSGALNACT1, VNN1, IER3, TGM1, POU2F2, LGALS9, SOD2, NFKBIZ, RHOF, C3, IKBKE, IFITM1, CORO1A, SAA2, S100A12, ADAM8, PDGFB, S100P, BCL3, ITGB3, TGM2, MAP3K8, IFITM3, ZP3, ADRB2, CXCL5, INHBA, LIF, IRAK3, TRIM47, PLSCR1, IL7R, CXCL8, RND1, IRF7, BST2, CXCL2, S100A8, IL6, IFI35, PDZK1IP1, SLC25A37, CHST2, TNIP1	C2	CGP	Genes up-regulated on infection of normal human bronchial epithelial cells by SARS-CoV-2 (MOI: 2, 24hpi)
REACTOME_ASSEMBLY_OF_COLLAGEN_FIBRILS_AND_OTHER_MULTIMERIC_STRUCTURES	0.000265637	0.00995389	0.498493	-0.454311	-1.98212	52	COL1A1, CTSV, COL14A1, COL8A1, CD151, COL1A2, COL6A2, PCOLCE, CTSB, COL3A1, COL6A3, COL18A1, LAMC2, COL15A1, COL12A1, COL4A2, COL4A1, LOX, COL8A2, PXDN	C2	CP:REACTOME	Assembly of collagen fibrils and other multimeric structures
GOCC_TRANSPORT_VESICLE_MEMBRANE	0.000265719	0.00995389	0.498493	-0.308892	-1.70321	180	GABRA2, HLA-DQA1, HLA-DQB1, SEC31B, SLC32A1, STX1A, HLA-DRB5, RAB11FIP5, PDCD6, RAB27B, RAB3A, HLA-DRB1, SYT7, OTOF, UNC13A, OPRK1, SV2B, HLA-DRA, GRIA1, STX5, SLC9B2, SEC13, SCAMP1, CNIH2, AP1G1, RPH3A, HLA-B, DMXL2, SV2A, HLA-A, HLA-E, SCGN, CD74, SEC24D, SNCA, DGKI, PRRT1, SNTB2, ATP2B1, MAL2, SLC6A17, RAB3B, RAB35, FOLR1, AP1S1, PAM, CLTC, LRRK2, SYT1, TMED2, SEC31A, PEF1, CD59, SYNPR, GAD2, …	C5	GO:CC	The lipid bilayer surrounding a transport vesicle. [GOC:mah]
REACTOME_APC_C_MEDIATED_DEGRADATION_OF_CELL_CYCLE_PROTEINS	0.000266839	0.00997596	0.498493	-0.385495	-1.85899	83	PSMD4, PSMA7, CDK1, PSMD13, PSMD1, ANAPC7, PTTG1, FBXO5, PSMB3, UBC, CDC23, SKP1, CUL1, PSMD8, PSMA1, PSME3, PSMA6, PSMC4, CCNB1, PSMD12, ANAPC1, RB1, PSMD3, PSMD2, PSMB7, BUB3, PSMC6, CDK2, BTRC, PSMB4, PSMC1, NEK2, PSMB5, PSMD14, ANAPC11, PLK1, MAD2L1, PSMB10, PSMD11	C2	CP:REACTOME	APC/C-mediated degradation of cell cycle proteins
MUELLER_METHYLATED_IN_GLIOBLASTOMA	0.000267079	0.00997596	0.498493	-0.557182	-2.13016	30	SERPINF1, LSR, SPINT1, TES, S100A4, LAPTM5, SERPIND1, F11R, IER3, LXN, KRT19, S100P, FBXO2, MAST3, SFN	C2	CGP	Genes up-regulated in short-term cultured glioblastomas after azacitidine [PubChem=9444] treatment.
DESCARTES_FETAL_MUSCLE_SMOOTH_MUSCLE_CELLS	0.000269781	0.0100573	0.498493	-0.432695	-1.9536	60	ACTG2, TAGLN, ACTA2, MYH11, CCN4, AOC3, ANO1, PLN, FHL5, KIAA1549L, NDUFA4L2, FOXS1, LAMC3, CABP1, ADRA1D, EDNRA, RRAD, RAB3B, RBPMS2, ENTPD3, PDGFRB, KCNAB1, SLIT3, CACNA1C, KCNA5, RCAN2, GUCY1A2, CCDC3, GPC6	C8		descartes DE_gene_by_organ.csv, fold.change>5, qval<0.05, pval<0.05
GSE10325_LUPUS_CD4_TCELL_VS_LUPUS_BCELL_DN	0.000270033	0.0100573	0.498493	-0.315652	-1.71596	160	HLA-DQA1, HLA-DQB1, COCH, TAGLN, P2RX5, ATP10D, SLC17A9, CHST15, FCGR2B, ADAM28, TSPAN13, HLA-DRB1, GRN, B4GALT1, CD180, LAMC1, TUBB6, TBC1D9, IFI30, PNOC, HLA-DOB, CD24, HLA-DRA, HCK, BLNK, SCPEP1, RHBDF2, SYK, FCGR2A, PLCG2, LAT2, CD37, CD74, BASP1, PRKCD, BEND5, IRF8, TPD52, HLA-DMB, CSF2RB, SHMT2, LRRK1, SEL1L3, BANK1, CD86, ALOX5, PDLIM1, DENND3, MAP3K8, RUBCNL, LYN, MEF2A, FGR, TNFRSF17, PK…	C7	IMMUNESIGDB	Genes down-regulated in comparison of systemic lupus erythematosus CD4 [GeneID=920] T cells versus systemic lupus erythematosus B cells.
GOBP_CELLULAR_RESPONSE_TO_INTERFERON_GAMMA	0.000271038	0.0100802	0.498493	-0.377207	-1.82561	85	CD47, ASS1, HSP90AB1, CCL19, MYO1C, MRC1, HCK, MYC, IL12RB1, AIF1, SP100, GBP1, CCL5, ACTG1, ACTR2, CCL4, CCL3, LGALS9, CASP1, JAK1, CX3CL1, IRF8, WNT5A, GBP2, ACTR3, IRF1, GAPDH, RAB20, CDC42, PARP14, CCL3L3, STAT1, NOS2, NR1H2, NLRC5, GSN, STXBP1, CCL21, VIM, TLR3, VPS26B	C5	GO:BP	Any process that results in a change in state or activity of a cell (in terms of movement, secretion, enzyme production, gene expression, etc.) as a result of an interferon-gamma stimulus. Interferon gamma is the only member of the type II interferon found so far. [GOC:mah]
SRF_Q6	0.000272343	0.0101142	0.498493	-0.28944	-1.63393	210	COL1A1, ACTG2, PRUNE2, TAGLN, COL1A2, MYH11, TPM2, MYL9, ROCK2, GPR158, SVIL, PDLIM4, THBS1, LPP, PFN1, VCL, CITED2, PDLIM7, TGFB1I1, JPH2, PLN, TES, SUSD1, CNN2, NPR3, MRGPRF, ELAVL4, AKIRIN2, MAP2K6, NR2F2, ACTB, MBNL1, LRRFIP1, SIPA1, KCNMB1, MUS81, NPAS4, KLF6, NFATC4, ACTC1, KBTBD12, PODN, CABP1, MYL6, ACTN1, FAM53C, SLC25A4, PRELP, CX3CL1, MAP3K20, WNT5A, TNNC1, ACTR3, LDHA, UBE2D3, LSP1, M…	C3	TFT:TFT_Legacy	Genes having at least one occurrence of the motif GNCCAWATAWGGMN in the regions spanning 4 kb centered on their transcription starting sites [-2kb, +2kb]. This matches the SRF [GeneSymbol=SRF] transcription factor binding site V$SRF_Q6 (v7.4 TRANSFAC).
REACTOME_CHEMOKINE_RECEPTORS_BIND_CHEMOKINES	0.000273489	0.0101422	0.498493	-0.534674	-2.07668	32	CCL28, PPBP, CCL19, CCR9, CCR5, CCL5, CCL4, CCL3, CXCL12, CCRL2, CCR1, CX3CL1, CXCR4, CXCL5, CXCR1, CXCR2, CCL3L3, CXCL8, CCL21, CXCL2	C2	CP:REACTOME	Chemokine receptors bind chemokines
REACTOME_HCMV_INFECTION	0.000275215	0.0101864	0.498493	0.356319	1.76443	147	H2AC4, NUP54, CHMP3, H3C3, H2BC3, H4C2, H2BC9, H2AC11, H2BC7, H2AC12, H3C7, NUP133, TRIM28, H3C2, NCOR1, H2AC17, H2BC17, H2AC14, H4C13, H3C8, DAXX, H3C11, H4C14, MVB12B, H2AC13, VPS4A	C2	CP:REACTOME	HCMV Infection
TURASHVILI_BREAST_LOBULAR_CARCINOMA_VS_DUCTAL_NORMAL_UP	0.000275552	0.0101864	0.498493	-0.432114	-1.95098	60	COL1A1, FBXO28, COL8A1, COL1A2, COL3A1, COL6A3, CCN4, UXS1, PLXNC1, TAGAP, FN1, COL12A1, LAMB1, SULF1, CTHRC1, LOX, RGS1, EDNRA, POSTN, GPX8, ADAM12, CXCR4, COL11A1, INHBA, AEBP1, PRRX1, SFRP2, HSPA6, SPARC, FBN1, ZEB1, MICAL2	C2	CGP	Genes up-regulated in lobular carcinoma vs normal ductal breast cells.
MODULE_91	0.00027586	0.0101864	0.498493	-0.534966	-2.14475	36	PSMD4, PSMA7, PSMD13, PSMD1, PSMB3, PSMD8, PSMA1, PSMA6, PSMC4, PSMD12, UBE2D3, PSMD3, PSMD2, PSMB7, PSMC6, PSMB4, PSMC1, H2AZ1, PSMB5, PSMD14	C4	CM	Proteasome.
GSE19401_UNSTIM_VS_RETINOIC_ACID_AND_PAM2CSK4_STIM_FOLLICULAR_DC_DN	0.000277477	0.0102244	0.498493	-0.310954	-1.71141	177	CD47, FBLN5, LSR, TNFSF8, TSPAN4, OLFML2A, ANKLE2, PPP3CB, NRP1, THBS1, F13A1, BID, TSPYL5, TNFRSF21, LAMC1, CITED2, CDC42EP3, GADD45B, FN1, MAP2K3, DUSP14, ATRN, CTSK, PDPN, BTG1, SLA, STK10, CCT6A, C3AR1, SLC26A2, GEM, CCL5, GYPC, STAB1, FAS, FOLR2, ACVR1, PTGER4, IL18R1, BATF, IRF8, RRAD, P2RX4, ATP1B1, MAP3K8, PTX3, HNRNPA0, OLFML2B, DYRK3, BCL2A1, AKR1B1, SDC2, SLC7A8, NLRP3, TRIP10, PES1, I…	C7	IMMUNESIGDB	Genes down-regulated in the in vitro follicular dendritic cells from peripheral lymph nodes: non-stimulated versus tretinoin [PubChem=444795] and Pam2CSK4 (96h).
GSE37605_TREG_VS_TCONV_NOD_FOXP3_FUSION_GFP_UP	0.00027768	0.0102244	0.498493	-0.34819	-1.81632	127	GSTO2, ITGA5, COL6A2, MFHAS1, ADAMTS15, ADAMTS1, CEBPB, TGFB1I1, PPM1E, SELE, NR4A3, RBM24, BTG2, OASL, COL4A2, CEBPD, UPP2, DUSP1, JUN, IER3, ARL4D, FOXS1, CCRL2, RGS1, TNFSF18, PPP1R15A, SMAD7, PLK2, FOSL2, SLC20A1, RND3, SLC25A25, ACADL, HSPA1A, PTGS2, PPP1R2, JUNB, SPRY1, APOLD1, DUSP5, GADD45A, CDKL1, ID3, ADAMTS9, IER2, NPAS2, SERPINE1, FOS, EGR3	C7	IMMUNESIGDB	Genes up-regulated in splenocytes from Foxp3-Fusion-GFP NOD mice: T reg (FOXP3+ [GeneID=50943]) versus T conv (FOXP3- [GeneID=50943]) cells.
[truncated: 25,182 more rows]

## Sheet: STable3
Age-associated CpGs shared between CBMAP and ROSMAP
[truncated: 411 more rows]

## Sheet: STable4
GO enrichment analysis of the CpGs shared by CBMAP and ROSMAP
[truncated: 10 more rows]

## Sheet: STable5
CBMAP-specific age-associated CpGs
[truncated: 28 more rows]

[truncated: 16 more sheets: STable6, STable7, STable8, STable9, STable10, STable11, STable12, STable13, STable14, STable15, STable16, STable17, STable18, STable19, STable20, STable21]
