# Supplementary material for: Epigenetic Rewiring Connects Aging to Alzheimer’s Pathology in the Human Prefrontal Cortex
Source: Research Square preprint supplement (doi:10.21203/rs.3.rs-7381745/v1), 2025-08-29
Supplement: Supplementary file 2 [file 9f2f999b3f9969fe6b52878d.docx]

**Epigenetic Rewiring Connects Aging to Alzheimer’s Pathology in the Human Prefrontal Cortex**

Supplementary Figure


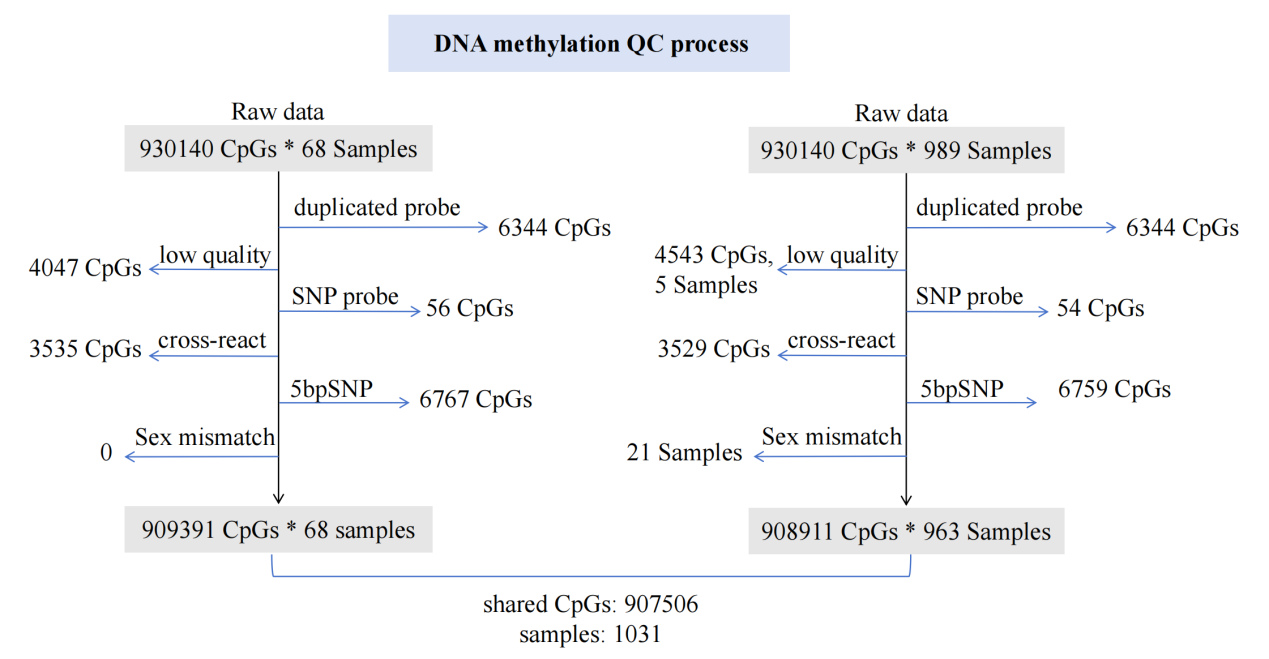


**Extended Data Fig. 1. DNA methylation quality control and filtering.** 907,506 CpG sites from 1,031 samples passed quality checks and were retained in downstream analyses.


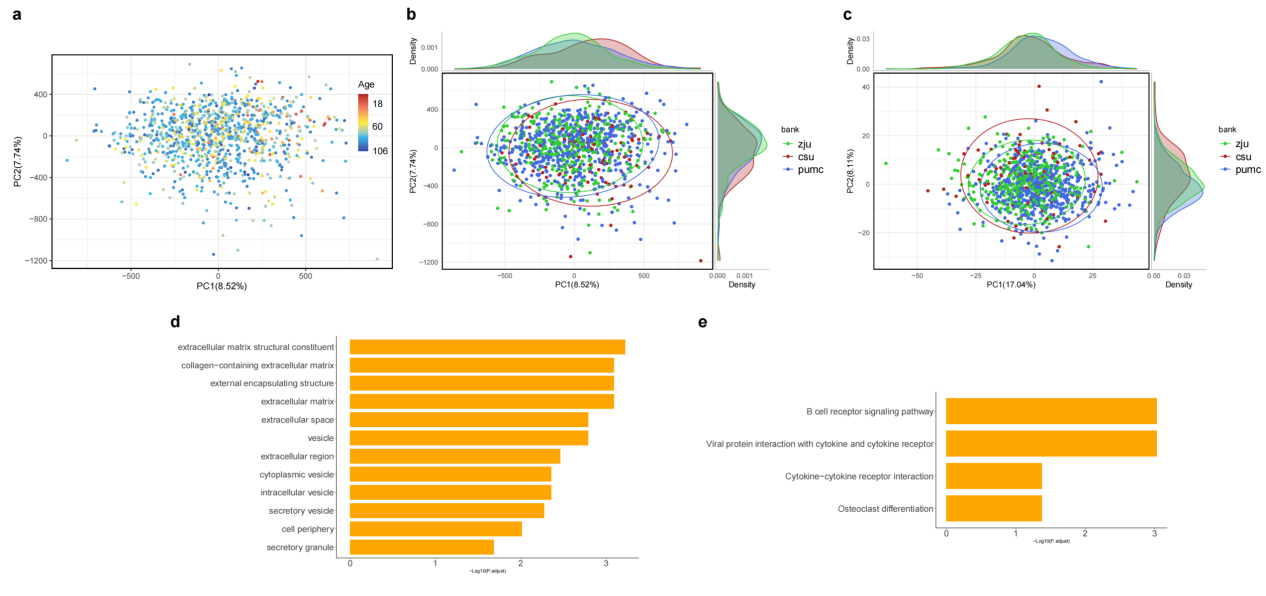


**Extended Data Fig. 2. PCA of methylation data and functional enrichment analysis (GO/KEGG) of genes linked to methylation differences between northern and southern regions.** **a,** PCA of methylation data across age; **b,** PCA of methylation data across regions; **c,** PCA of the most differentially methylated CpGs between northern and southern China. **d,** GO terms enriched in genes linked to differentially methylated CpGs between northern and southern China. **e,** KEGG pathways enriched in genes linked to differentially methylated CpGs between northern and southern China.


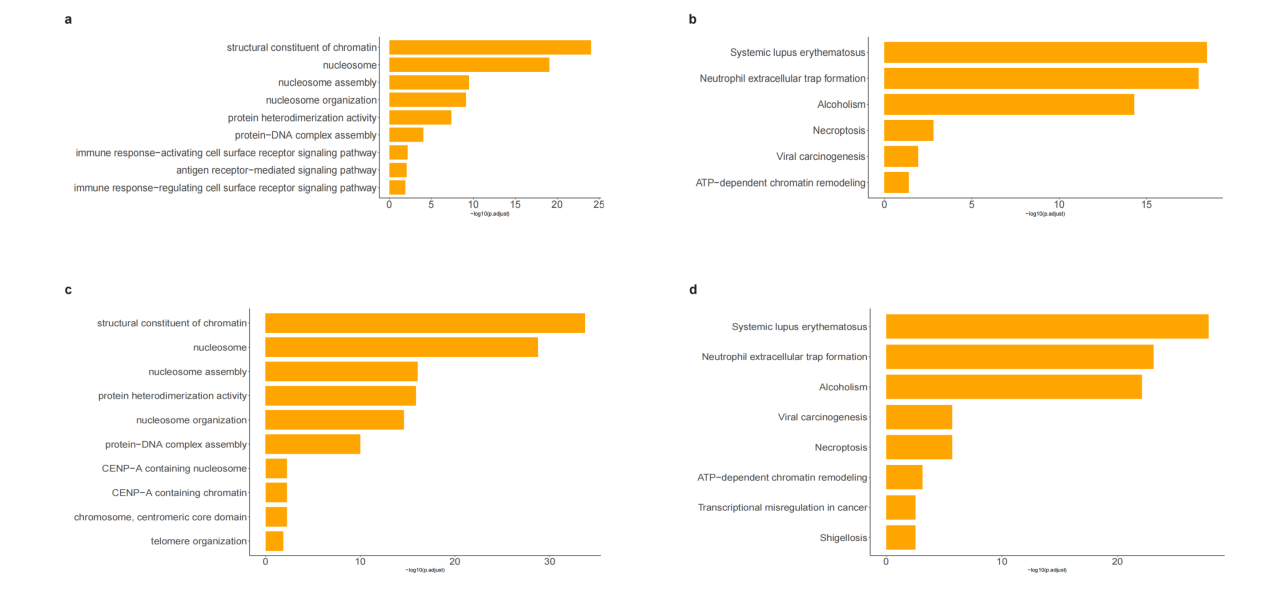


**Extended Data Fig. 3. Functional enrichment analysis (GO/KEGG) of genes linked to PFC-shared and PFC-specific CpGs. a,** PFC-shared GO terms; **b,** PFC-shared KEGG pathways; **c,** PFC-specific GO terms; **d,** PFC-specific KEGG pathways.


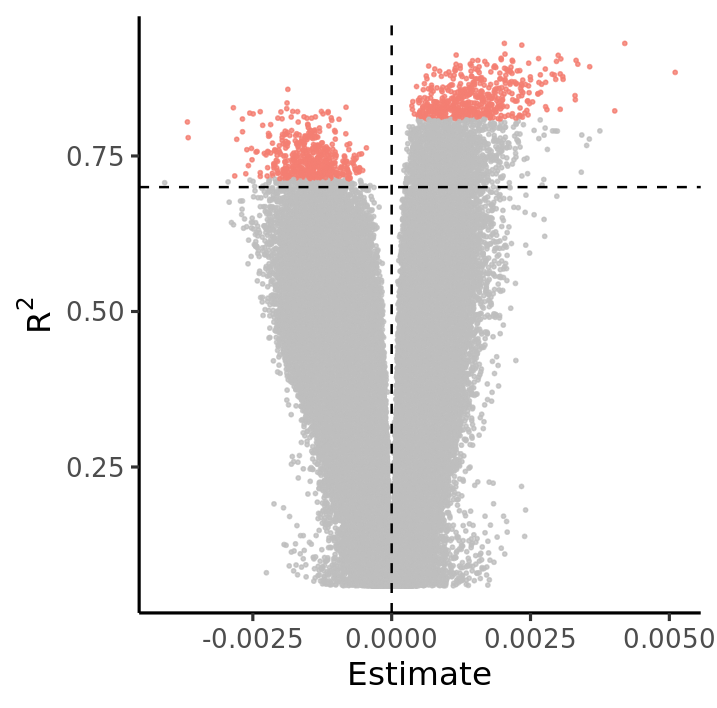


**Extended Data Fig. 4. Scatter plot of DNA methylation-age associations.** The x-axis represents the regression coefficient for the linear relationship between methylation levels and age at each CpG site. The y-axis shows the coefficient of determination (R2) from the regression model. Dashed lines indicate thresholds: x = 0 and y = 0.7 (high variance explained). Red highlights denote the top 500 CpG sites with the smallest *P*-values, stratified by positive and negative coefficients. These selected sites were prioritized for downstream analysis due to their strong age-related methylation signals.


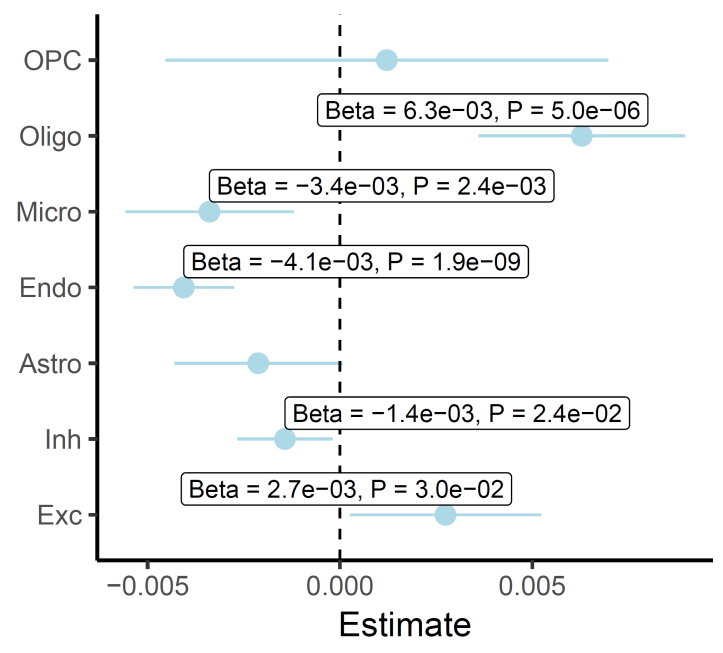


**Extended Data Fig. 5. Associations between MethAge and estimated cell-type proportions in ROSMAP.**


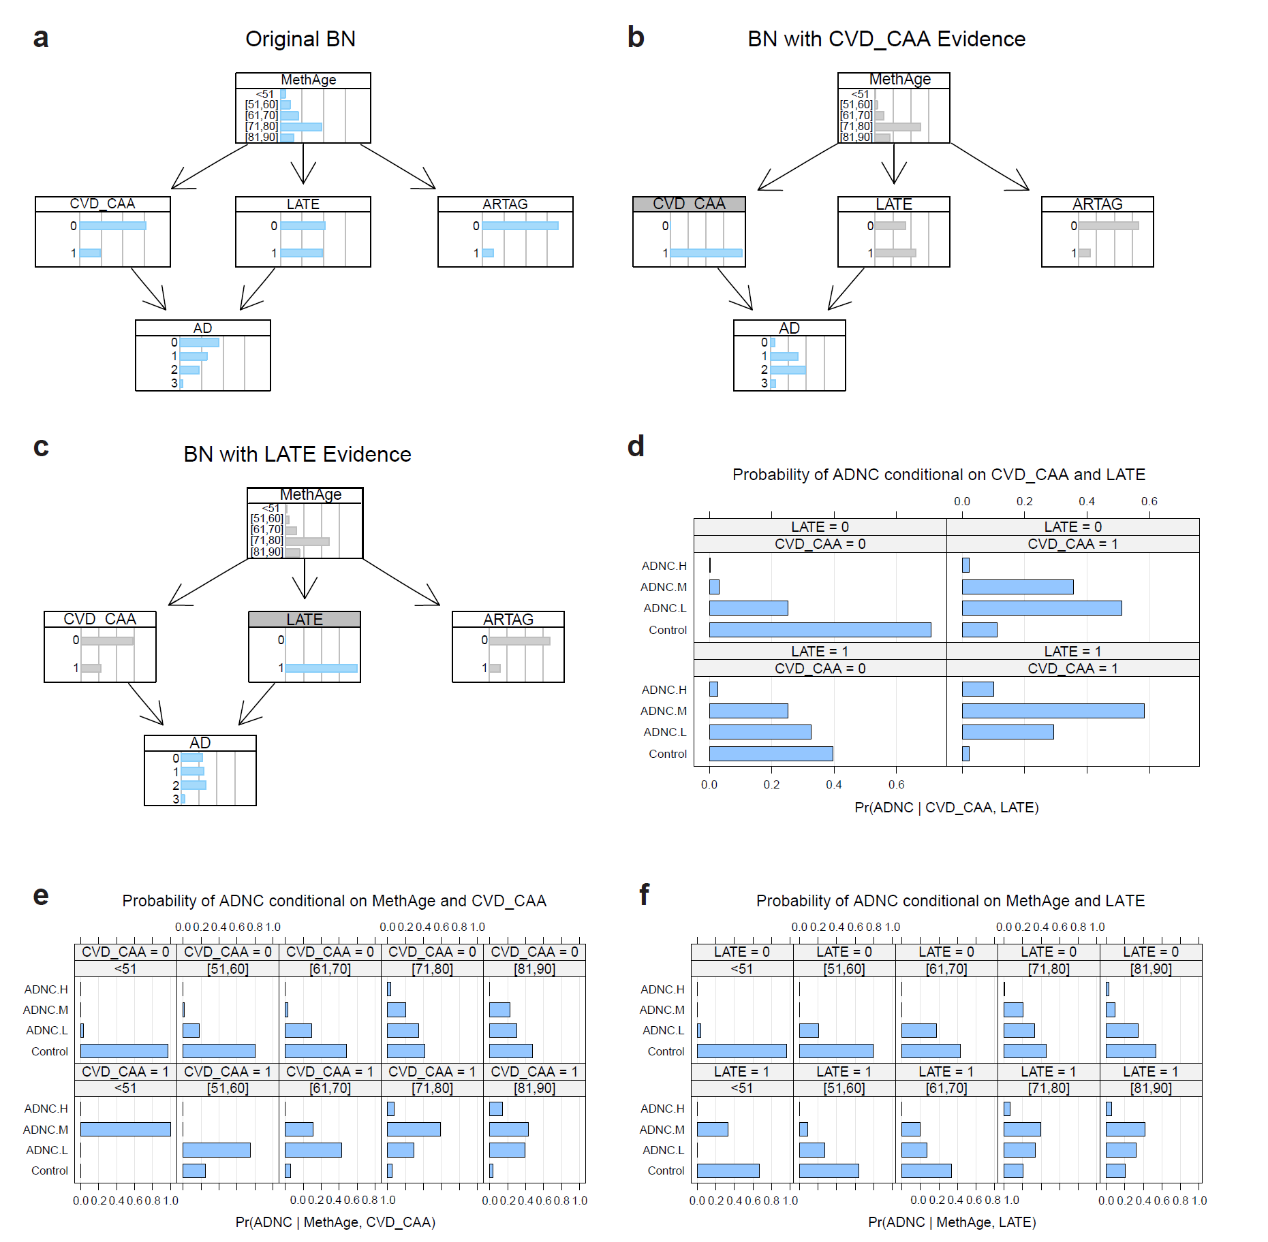


**Extended Data Fig. 6. Bayesian network analysis of conditional dependencies between MethAge, ADNC, and neuropathological variables.** **a,** The original Bayesian network (BN) structure with MethAge as the upstream variable and ADNC as the primary outcome. **b,** The Bayesian network incorporating cerebral amyloid angiopathy (CVD_CAA) evidence. **c,** The Bayesian network with limbic-predominant age-related TDP-43 encephalopathy (LATE) evidence. **d,** Conditional probabilities of ADNC given CVD_CAA and LATE, showing the distribution of probabilities across different ADNC groups under varying CVD_CAA and LATE conditions. **e,** Conditional probabilities of ADNC given MethAge and CVD_CAA, stratified by MethAge groups (<51, [51.60], [61.70], [71.80], [81.90]). **f,** Conditional probabilities of ADNC given MethAge and LATE, further stratified by MethAge groups.


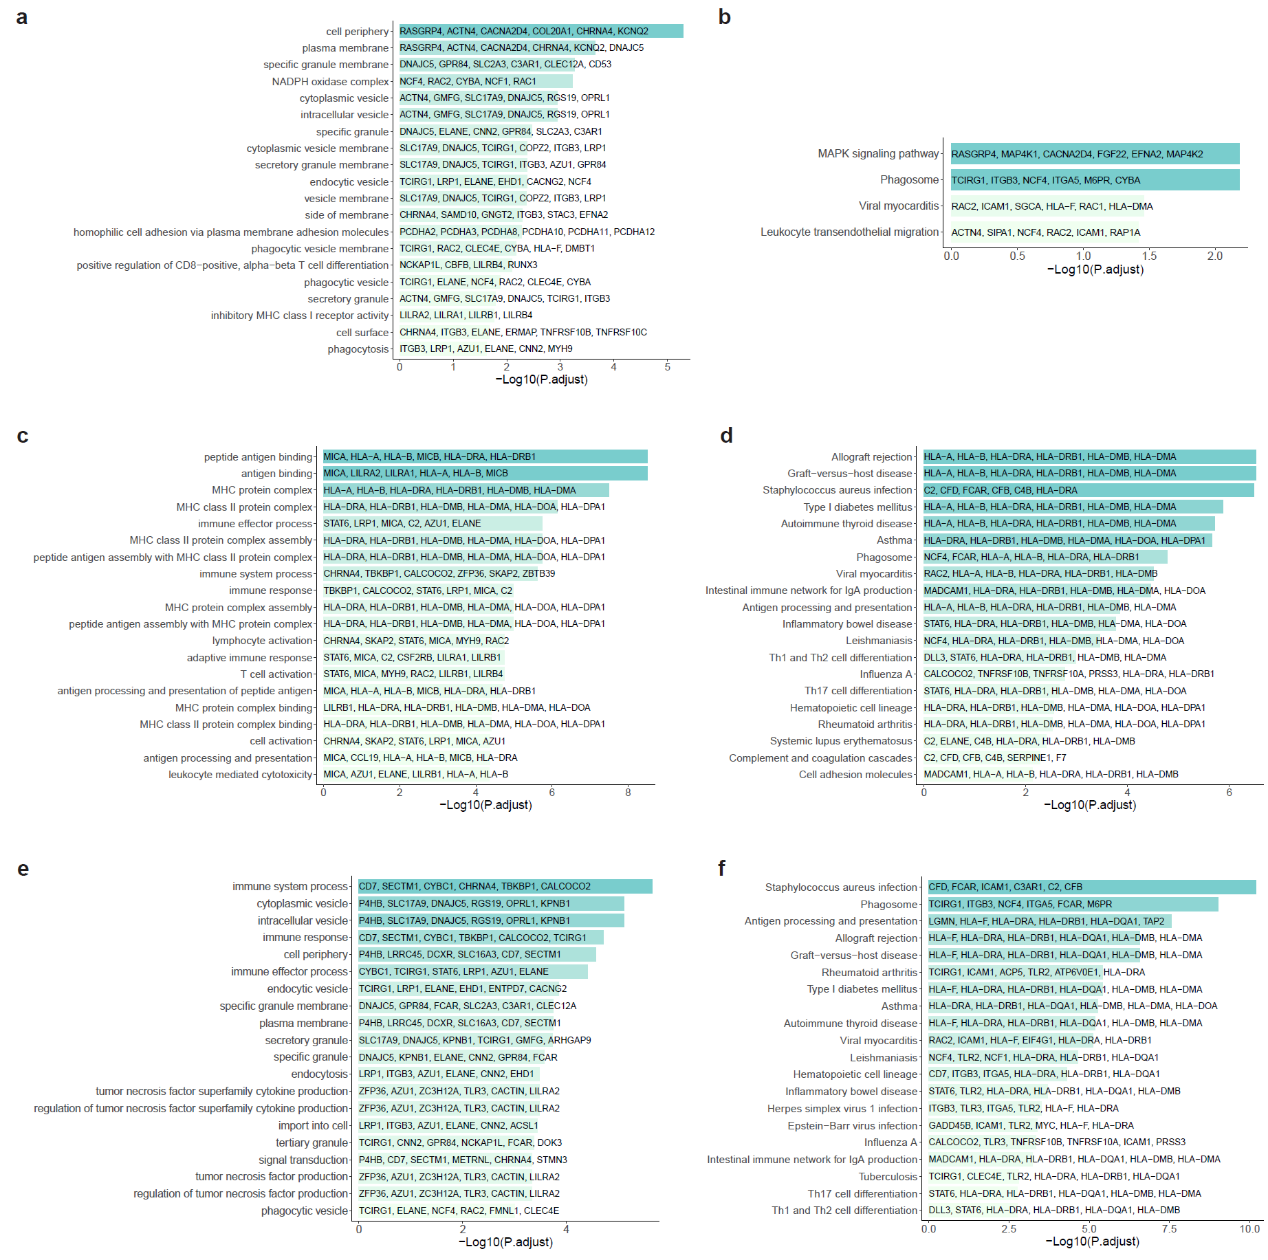


**Extended Data Fig. 7. Functional enrichment analysis (GO/KEGG) of genes linked to AD pathology-related CpGs. a,** ADNC-associated GO terms; **b,** ADNC-associated KEGG pathways; **c,** Braak-associated GO terms; **d,** Braak-associated KEGG pathways; **e,** Aβ-associated GO terms; **f,** Aβ-associated KEGG pathways. Top 20 terms most significant shown per panel; darker bars indicate lower *P*-values.


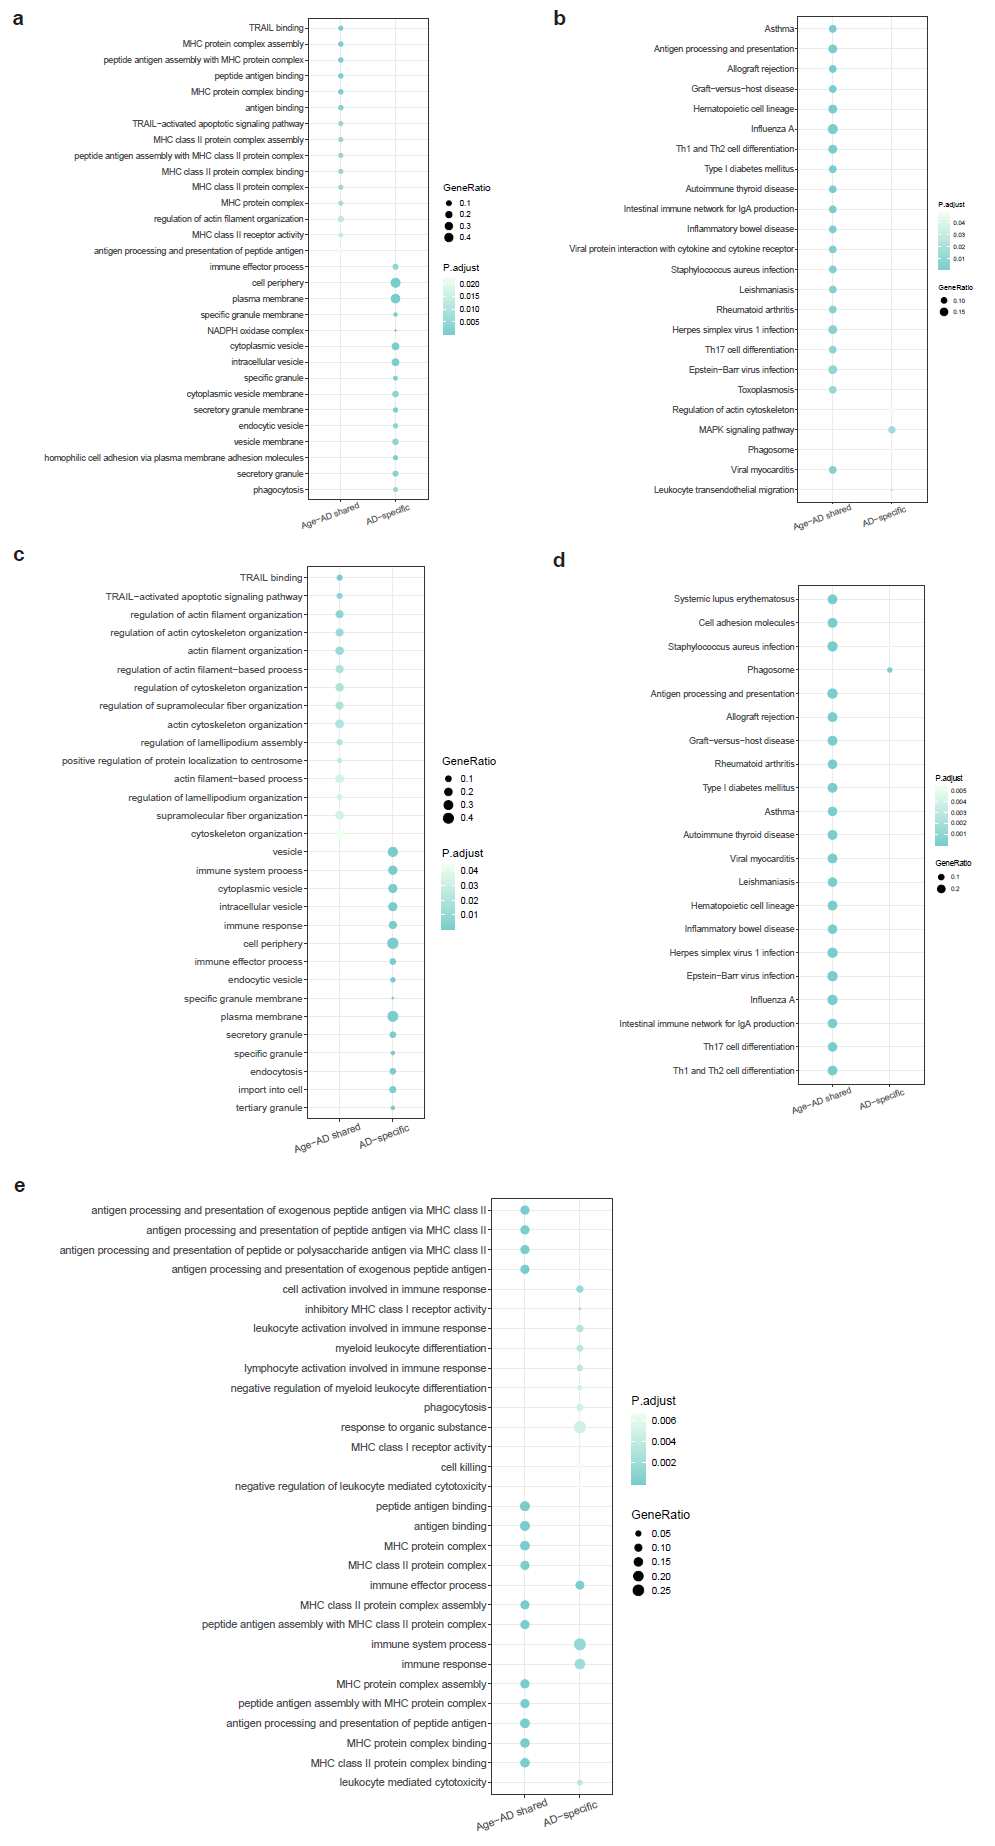


**Extended Data Fig. 8. Functional enrichment analysis (GO/KEGG) of genes linked to CpG sites associated with age and Alzheimer’s disease neuropathology. a–e,** Bubble plots showing Gene Ontology (GO) and KEGG pathway enrichment results for CpG sites associated with Alzheimer’s disease–related neuropathological traits. In each panel, the x-axis distinguishes CpG sites associated with both age and neuropathology (left column) from those associated exclusively with neuropathological features (right column), including ADNC level, Braak NFT stage, or A score. **a,** GO enrichment for CpG sites associated with ADNC. **b,** KEGG enrichment for CpG sites associated with ADNC. **c,** GO enrichment for CpG sites associated with A score. **d,** KEGG enrichment for CpG sites associated with A score. **e,** GO enrichment for CpG sites associated with Braak NFT stage.
